# Supplementary material for: GAS5, a long noncoding RNA, contributes to annulus fibroblast osteogenic differentiation and apoptosis in intervertebral disk degeneration via the miR-221-3p/SOX11 axis
Source: Aging (Albany NY). 2024 Feb 23;16(4):3896–914. doi: 10.18632/aging.205567 (PMC10929823; doi:10.18632/aging.205567)
Supplement: Supplementary Tables 2-4 [file aging-16-205567-s003.xlsx]

## Sheet: Supplementary Table 2
Supplementary Table 2. The potential target lncRNAs of miR-221-3p predicted by ENCORI.
miRNAid	miRNAname	geneID	geneName	geneType	chromosome	start	end	strand	clipExpNum	degraExpNum	RBP	merClass	miRseq	align	targetSeq	pancancerNum
MIMAT0000278	hsa-miR-221-3p	ENSG00000243960	AL390195.1	sense_overlapping	chr1	111983507	111983529	-	4	0	AGO1,AGO2	7mer-m8	cuuugggucgucuguUACAUCGa	|||||||	ugacgaaaggguuuuAUGUAGCu	2
MIMAT0000278	hsa-miR-221-3p	ENSG00000261716	AC239868.1	sense_overlapping	chr1	149817877	149817899	-	1	0	AGO1-4	7mer-m8	cuuugggucGUCUGUUACAUCGa	|: || |||||||	gucauaauaCGUACUAUGUAGCg	12
MIMAT0000278	hsa-miR-221-3p	ENSG00000234741	GAS5	processed_transcript	chr1	173833269	173833292	-	10	0	AGO1-4,AGO2	8mer	cuuUGGGUCGU-CUGUUACAUCGa	|::| ||| | |||||||	gauAUUCUGCAUUCCCAUGUAGCa	9
MIMAT0000278	hsa-miR-221-3p	ENSG00000261060	AL160286.2	sense_overlapping	chr1	179560089	179560112	+	1	0	AGO1-4	8mer	cuuuggGUCGUCUG-UUACAUCGa	|| :|| | |||||||	ugaggaCACUAGUCUCAUGUAGCa	13
MIMAT0000278	hsa-miR-221-3p	ENSG00000227403	LINC01806	lincRNA	chr2	162104966	162104991	+	1	0	AGO1-4	7mer-m8	cuUUG-GGUCGU-C-UGUUACAUCGa	:|| :: ||| | | ||||||||	uaGACAUUUGCAUGUAAAAUGUAGCu	4
MIMAT0000278	hsa-miR-221-3p	ENSG00000237298	TTN-AS1	antisense	chr2	179451409	179451430	+	2	0	AGO1-4,AGO2	7mer-m8	cuuugggUCGUCUGUUACAUCGa	| :|| ::|||||||	cucuguaACUAG-UGAUGUAGCc	4
MIMAT0000278	hsa-miR-221-3p	ENSG00000214773	AC112512.1	sense_intronic	chr3	47645612	47645633	-	1	0	AGO1-4	7mer-m8	cuuuGGGUCGUCUGUUACAUCGa	|: :|:| : ||||||||	acuuCUAGGUAUG-AAUGUAGCu	2
MIMAT0000278	hsa-miR-221-3p	ENSG00000241472	PTPRG-AS1	processed_transcript	chr3	62247595	62247616	-	1	0	AGO1-4	8mer	cuuUGGGUCGUCUGUUACAUCGa	|| ||| | | :|||||||	uuuACACAGAACA-GAUGUAGCa	6
MIMAT0000278	hsa-miR-221-3p	ENSG00000226950	DANCR	processed_transcript	chr4	53578993	53579013	+	2	0	AGO1-4	7mer-m8	cuUUGGGUCGUCUGUUACAUCGa	:|| |: | || |||||||	cuGACGCGCC--ACUAUGUAGCg	13
MIMAT0000278	hsa-miR-221-3p	ENSG00000273156	AC124016.2	lincRNA	chr4	83266066	83266088	-	1	0	AGO1-4	8mer	cuuUGGGUCGUCUGUUACAUCGa	::::| : |:||||||||	uauGUUUAAAGUAUAAUGUAGCa	7
MIMAT0000278	hsa-miR-221-3p	ENSG00000270681	AC095055.1	antisense	chr4	152062139	152062161	+	3	0	AGO2	7mer-m8	cuUUGGGUCGUCUGUUACAUCGa	| :|:| ::| :||||||||	agACUCUAAUGGCUAAUGUAGCu	8
MIMAT0000278	hsa-miR-221-3p	ENSG00000230551	AC021078.1	processed_transcript	chr5	148878382	148878404	-	2	0	AGO1-4	8mer	cuUUGGGUCGUCUGUUACAUCGa	| :::: | |||||||||||	guAUUUUGACUGACAAUGUAGCa	6
MIMAT0000278	hsa-miR-221-3p	ENSG00000235381	AL596202.1	antisense	chr6	155577462	155577483	-	2	0	AGO2	7mer-m8	cuUUGGGUCGUCUGUUACAUCGa	||:: :||| | ||||||||	guAAUUAGGCA-AAAAUGUAGCu	14
MIMAT0000278	hsa-miR-221-3p	ENSG00000257607	AC073957.2	antisense	chr7	1098040	1098060	-	1	0	AGO2	7mer-m8	cuUUGGGUCGUCUGUUACAUCGa	|:|:| ::| : |||||||	gaAGCUC--UGGUUCAUGUAGCg	0
MIMAT0000278	hsa-miR-221-3p	ENSG00000281332	LINC00997	lincRNA	chr7	32802346	32802369	+	1	0	AGO1-4	7mer-m8	cuuugGGUCGUCUGU-UACAUCGa	::||| ||:: |||||||	uucugUUAGCUGAUGUAUGUAGCc	8
MIMAT0000278	hsa-miR-221-3p	ENSG00000243107	AC000120.1	sense_overlapping	chr7	91829408	91829430	-	7	0	AGO1-4,AGO2	7mer-m8	cuuugggUCGUCUGUUACAUCGa	|| | ||||||||	ugugaugAGAUUAAAAUGUAGCu	8
MIMAT0000278	hsa-miR-221-3p	ENSG00000214106	PAXIP1-AS2	antisense	chr7	154743015	154743037	+	1	0	AGO2	7mer-m8	cuUUGGGUCGUCUGUUACAUCGa	:||||| | |||||||||	auGACCCAAAUGUCAAUGUAGCu	9
MIMAT0000278	hsa-miR-221-3p	ENSG00000272760	AC093726.1	antisense	chr7	154743015	154743037	+	1	0	AGO2	7mer-m8	cuUUGGGUCGUCUGUUACAUCGa	:||||| | |||||||||	auGACCCAAAUGUCAAUGUAGCu	7
MIMAT0000278	hsa-miR-221-3p	ENSG00000254343	AC091563.1	lincRNA	chr8	121068325	121068347	+	1	0	AGO1-4	7mer-m8	cuuugggucgucuGUUACAUCGa	| |||||||	auaucugauucucCUAUGUAGCc	12
MIMAT0000278	hsa-miR-221-3p	ENSG00000259891	AC107375.1	antisense	chr8	141517086	141517107	-	2	0	AGO1-4	7mer-m8	cuuuggGUCGUCUGUUACAUCGa	:|||||| :|||||||	ggcagaUAGCAGA-GAUGUAGCc	12
MIMAT0000278	hsa-miR-221-3p	ENSG00000237036	ZEB1-AS1	antisense	chr10	31606852	31606874	-	2	0	AGO1-4,AGO2	8mer	cuuugggucgucUGUUACAUCGa	||||||||||	aguuauaaauuaACAAUGUAGCa	13
MIMAT0000278	hsa-miR-221-3p	ENSG00000203876	ADD3-AS1	processed_transcript	chr10	111715877	111715899	-	1	0	AGO2	8mer	cuUUGGGUCGUCUGUUACAUCGa	|| : | || | |||||||	ugAAAUAAUCAUAAUAUGUAGCa	10
MIMAT0000278	hsa-miR-221-3p	ENSG00000260917	AL158212.3	sense_overlapping	chr10	114585845	114585867	+	1	0	AGO2	7mer-m8	cuUUGGGUCGUCUGUUACAUCGa	:::|| | | |: |||||||	ugGGUCCUGAAAAUUAUGUAGCc	8
MIMAT0000278	hsa-miR-221-3p	ENSG00000245532	NEAT1	lincRNA	chr11	65198076	65198097	+	10	0	AGO1-4	7mer-m8	cuuugGGUCGUCUGUUACAUCGa	|:| :||: |||||||	uuauaCUAAAGGAU-AUGUAGCc	2
MIMAT0000278	hsa-miR-221-3p	ENSG00000272301	AP002360.3	lincRNA	chr11	76101067	76101089	+	1	0	AGO1-4	7mer-m8	cuuugggucgUCUGUUACAUCGa	| |: |||||||	uuaaaaugaaAAAUCAUGUAGCu	14
MIMAT0000278	hsa-miR-221-3p	ENSG00000261098	AP000766.1	lincRNA	chr11	107183981	107184004	-	1	0	AGO2	8mer	cuUUGGGUCGUCUG-UUACAUCGa	::| ||||| | ||||||||	uaGGCACAGCAUUCUAAUGUAGCa	12
MIMAT0000278	hsa-miR-221-3p	ENSG00000246695	RASSF8-AS1	antisense	chr12	26098944	26098965	-	1	0	AGO1-4	8mer	cuuuggGUCGUCUGUUACAUCGa	| || || |||||||	cccuuaCUGCCCAC-AUGUAGCa	12
MIMAT0000278	hsa-miR-221-3p	ENSG00000228630	HOTAIR	antisense	chr12	54356181	54356203	-	3	0	AGO2	7mer-m8	cuUUGGGUCGUCUGU-UACAUCGa	|:: :| :| || |||||||	ggAGUAUA-UACUCACAUGUAGCu	6
MIMAT0000278	hsa-miR-221-3p	ENSG00000256571	AC079866.2	sense_intronic	chr12	64272567	64272581	+	2	0	AGO1-4	7mer-m8	cuuuggguCGUCUGUUACAUCGa	|| |:::|||||||	#NAME?	3
MIMAT0000278	hsa-miR-221-3p	ENSG00000215256	DHRS4-AS1	antisense	chr14	24408446	24408466	-	1	0	AGO2	7mer-m8	cuuUGGGUCGUCUGUUACAUCGa	|:|| :: || |||||||	agcAUCC-UUGUAC-AUGUAGCu	18
MIMAT0000278	hsa-miR-221-3p	ENSG00000257621	PSMA3-AS1	antisense	chr14	58732204	58732227	-	2	0	AGO1-4,AGO2	7mer-m8	cuuUGGGUCGUCUG--UUACAUCGa	| ||| ::||| ||||||||	agcAGCCA-UGGACUGAAUGUAGCu	10
MIMAT0000278	hsa-miR-221-3p	ENSG00000258532	LINC02305	lincRNA	chr14	84380338	84380361	-	1	0	AGO1-4	7mer-m8	cuuUGGGUCGUCUG-UUACAUCGa	| :||| || : :|||||||	acuAAUCAGAAGCUGGAUGUAGCu	0
MIMAT0000278	hsa-miR-221-3p	ENSG00000187951	ARHGAP11B	processed_transcript	chr15	31064995	31065016	+	1	0	AGO1-4	7mer-m8	cuuuggguCGUCUGUUACAUCGa	|||||: |||||||	guuaaguuGCAGAU-AUGUAGCu	3
MIMAT0000278	hsa-miR-221-3p	ENSG00000247556	OIP5-AS1	processed_transcript	chr15	41593687	41593709	+	2	0	AGO1-4,AGO2	7mer-m8	cuuugggUCGUCUGUUACAUCGa	| | |: ||||||||	ucaugagAACUGGAAAUGUAGCu	12
MIMAT0000278	hsa-miR-221-3p	ENSG00000263072	ZNF213-AS1	antisense	chr16	3183125	3183148	-	2	0	AGO1-4	7mer-m8	cuuugggUCGUC-UGUUACAUCGa	| ||| ::|||||||	auugggaAACAGCUUGAUGUAGCg	11
MIMAT0000278	hsa-miR-221-3p	ENSG00000278133	AC135050.6	sense_intronic	chr16	31133848	31133871	+	1	0	AGO1-4	7mer-m8	cuuUGGGUCGUCUGU-UACAUCGa	| ||| :|| || |||||||	cguAGCCACUAGCCACAUGUAGCu	13
MIMAT0000278	hsa-miR-221-3p	ENSG00000263276	AC020978.7	sense_overlapping	chr16	68260931	68260951	+	11	0	AGO1,AGO1-4,AGO2	7mer-m8	cuUUGGGUCGUCUGUUACAUCGa	||: ||| | ||||||||	gaAAUAAAGC-CA-AAUGUAGCu	5
MIMAT0000278	hsa-miR-221-3p	ENSG00000261777	AC012184.3	processed_transcript	chr16	70349550	70349574	-	1	0	AGO2	8mer	cuUUGGG--UCGUCUGUUACAUCGa	||||: ||:| :||||||||	uaAACCUAAAGUAAUUAAUGUAGCa	6
MIMAT0000278	hsa-miR-221-3p	ENSG00000279591	AC002044.2	TEC	chr16	73049400	73049421	-	1	0	AGO1-4	8mer	cuUUGGGUCGUCUGUUACAUCGa	:|: | :| || |||||||	uaGAUAAAAUAAAC-AUGUAGCa	2
MIMAT0000278	hsa-miR-221-3p	ENSG00000260923	LINC02193	lincRNA	chr16	90285744	90285765	+	1	0	AGO1-4	7mer-m8	cuuUGGGUCGUCUGUUACAUCGa	|| |||| | ||||||||	ugcACACAGC-CAGAAUGUAGCu	7
MIMAT0000278	hsa-miR-221-3p	ENSG00000267750	RUNDC3A-AS1	antisense	chr17	42379291	42379314	-	1	0	AGO1-4	7mer-m8	cuuugggucguCUG-UUACAUCGa	||: ||||||||	cacucuauuuuGAUGAAUGUAGCu	9
MIMAT0000278	hsa-miR-221-3p	ENSG00000279207	AC015813.6	TEC	chr17	56173783	56173805	+	1	0	AGO1-4	7mer-m8	cuuugggucgucugUUACAUCGa	||||||||	aauaauauuauguaAAUGUAGCu	7
MIMAT0000278	hsa-miR-221-3p	ENSG00000273702	AC091271.1	lincRNA	chr17	57696069	57696090	-	1	0	AGO1-4	7mer-m8	cuUUGGGUCGUCUGUUACAUCGa	|:| |:||| ||||||||	uuAGCAAUGUAGA-AAUGUAGCg	18
MIMAT0000278	hsa-miR-221-3p	ENSG00000215769	ARHGAP27P1-BPTFP1-KPNA2P3	processed_transcript	chr17	62746023	62746044	-	7	0	AGO1,AGO1-4,AGO2,AGO3	7mer-m8	cuUUGGGUCGUCUGUUACAUCGa	|||:: :|||: |||||||	uuAACUU-UUAGAUCAUGUAGCu	7
MIMAT0000278	hsa-miR-221-3p	ENSG00000263731	AC145207.5	lincRNA	chr17	79836636	79836658	-	2	0	AGO2	7mer-m8	cuuugggucguCUGUUACAUCGa	||: |||||||	agcuugucuguGAUCAUGUAGCc	8
MIMAT0000278	hsa-miR-221-3p	ENSG00000176912	TYMSOS	bidirectional_promoter_lncRNA	chr18	649752	649774	-	5	2	AGO2	8mer	cuUUGGGUCGUCUGUUACAUCGa	|| :::|:| |||||||	aaAAAUUGGUACUGUAUGUAGCa	9
MIMAT0000278	hsa-miR-221-3p	ENSG00000265413	AP001094.2	sense_intronic	chr18	8404421	8404442	+	1	0	AGO2	7mer-m8	cuuUGGGUCGUCUGUUACAUCGa	|:| |:: || |||||||	gucAUCAUGUGUAC-AUGUAGCc	12
MIMAT0000278	hsa-miR-221-3p	ENSG00000263917	AC011825.3	processed_transcript	chr18	29617162	29617184	+	1	0	AGO1	7mer-m8	cuuuGGGUCGUCUGUUACAUCGa	:|||||| ::|||||||	gaguUCCAGCAACUGAUGUAGCc	0
MIMAT0000278	hsa-miR-221-3p	ENSG00000267886	AC074135.1	lincRNA	chr19	23278160	23278182	+	1	0	AGO1-4	7mer-m8	cuuUGGGUCGUCUGUUACAUCGa	| | | ::| ::|||||||	uccAACAACUGGUUGAUGUAGCu	9
MIMAT0000278	hsa-miR-221-3p	ENSG00000236144	TMEM147-AS1	antisense	chr19	36036046	36036068	-	1	0	AGO1-4	7mer-m8	cuuuGGGUCGUCUGUUACAUCGa	|:|:|| || |||||||	uuguCUCGGCUGAACAUGUAGCg	12
MIMAT0000278	hsa-miR-221-3p	ENSG00000279861	AC073548.1	TEC	chr19	47991124	47991151	-	11	1	AGO1-4,AGO2	7mer-m8	cuUUGGGUCG----UCUGU-UACAUCGa	|:|| ||| | :|| |||||||	ccAGCCAAGCUCUAAAGCACAUGUAGCc	6
MIMAT0000278	hsa-miR-221-3p	ENSG00000269825	AC022150.4	sense_intronic	chr19	53154119	53154143	-	6	0	AGO1-4,AGO2	7mer-m8	cuuUGGGUCGUC-U-GUUACAUCGa	||:|| :|| | ::|||||||	accACUCAUUAGCAUUGAUGUAGCu	8
MIMAT0000278	hsa-miR-221-3p	ENSG00000228293	AL049712.1	antisense	chr20	2645066	2645091	+	1	0	AGO1-4	7mer-m8	cuUUG-GGUCGUC--UGUUACAUCGa	||| ::|| :| | ||||||||	auAACAUUAGGGGGAAAAAUGUAGCg	8
MIMAT0000278	hsa-miR-221-3p	ENSG00000274173	AL035661.1	lincRNA	chr20	24913430	24913453	+	1	0	AGO1-4	7mer-m8	cuuugGGUCGUCUGU-UACAUCGa	::||| ||:| |||||||	uucugUUAGCUGAUAUAUGUAGCc	9
MIMAT0000278	hsa-miR-221-3p	ENSG00000273840	AF254983.1	processed_transcript	chr21	11013543	11013565	-	1	0	AGO1-4	8mer	cuuugggUCGUCUGUUACAUCGa	||::|| ||||||||	aggaagaAGUGGAAAAUGUAGCa	4
MIMAT0000278	hsa-miR-221-3p	ENSG00000225783	MIAT	lincRNA	chr22	27072368	27072390	+	1	1	AGO1-4	7mer-m8	cuuuGGGUCGUCUGUUACAUCGa	::|| | ||||||||	uguuUUCAUCCAUGAAUGUAGCu	2
MIMAT0000278	hsa-miR-221-3p	ENSG00000253352	TUG1	bidirectional_promoter_lncRNA	chr22	31373372	31373398	+	20	0	AGO1,AGO1-4,AGO2	8mer	cuUUGGGUC-GUCUG---UUACAUCGa	:|||| | || | :|||||||	cuGACCCUGUCACUCCCAGAUGUAGCa	9
MIMAT0000278	hsa-miR-221-3p	ENSG00000280383	Z95331.1	sense_overlapping	chr22	46071625	46071647	+	1	0	AGO1-4	8mer	cuuugGGUCGUCUGUUACAUCGa	|:| : :| |||||||	uugggCUAAUUUGCUAUGUAGCa	7
MIMAT0000278	hsa-miR-221-3p	ENSG00000226179	LINC00685	antisense	chrX	281794	281815	+	1	0	AGO1-4	7mer-m8	cuUUGGGUCGUCUGUUACAUCGa	:|:: ||:|| ||||||||	ggGAUUGUGCGGA-AAUGUAGCc	5
MIMAT0000278	hsa-miR-221-3p	ENSG00000229563	LINC01204	lincRNA	chrX	45488730	45488752	+	1	0	AGO1-4	7mer-m8	cuuuGGGUCGUCUGUUACAUCGa	|:: || |: |||||||	aguuCUUUCCACAUCAUGUAGCu	0
MIMAT0000278	hsa-miR-221-3p	ENSG00000235244	DANT2	lincRNA	chrX	115034445	115034467	-	2	0	AGO1-4	7mer-m8	cuuUGGGUCGUCUGUUACAUCGa	| ::||| || |||||||	uacAAUUAGCUGAGCAUGUAGCc	7

## Sheet: Supplementary Table 3
Supplementary Table 3. The upregulated mRNA in IVDD based on GSE56081.
Gene Symbol	Regulation direction	Fold change	p-value	FDR
HBB	up	339.211	1.36e-05	0.00137439
MMP2	up	292.043	1.87e-07	0.000469
KCNJ2	up	261.401	7.79e-08	0.00038
COL1A2	up	130.078	6.9e-07	0.000469
PTP4A3	up	126.545	0.000206	0.0052494
MFAP4	up	73.1496	1.29e-05	0.0013322
GREM1	up	54.3931	3.68e-05	0.00237085
NKG7	up	46.8351	4.31e-06	0.000743
TREM1	up	44.4619	2.76e-06	0.000674
LUM	up	41.0319	1.17e-05	0.00126477
GAS1	up	38.4888	0.00319616	0.022253
PEMT	up	36.0136	7.59e-06	0.00104753
SERPINA3	up	35.6999	1.62e-07	0.000469
PPBP	up	34.764	7.71e-06	0.00105413
PCOLCE2	up	32.9121	1.24e-05	0.00131101
TWIST1	up	31.5747	4.04e-05	0.00245719
PKD1	up	30.3581	5.61e-06	0.000855
APLN	up	30.1792	3.58e-06	0.000725
COL8A2	up	28.0813	0.000147	0.00454083
NXPH4	up	27.0922	2.9e-05	0.00210858
S100A1	up	26.9703	3.77e-05	0.00240648
LRRC15	up	25.5259	2.76e-05	0.0020579
FLRT2	up	25.2483	7.95e-05	0.00338977
PF4	up	25.1409	0.000102	0.00379788
PTPRB	up	23.616	1.38e-05	0.00137587
KCNG1	up	23.1201	0.000239	0.00557238
IGFBP4	up	21.917	6.95e-05	0.00315011
PTGES	up	21.8132	0.000195	0.0051032
RGS11	up	21.5996	0.000152	0.00463301
LECT1	up	20.8297	4.75e-05	0.00267865
TPCN2	up	20.5434	0.000162	0.00471035
FUT4	up	20.3154	0.000571	0.00888067
HIST1H3B	up	20.2003	0.000465	0.00790938
CHI3L1	up	19.7156	1.4e-05	0.00138483
CCND2	up	18.7047	0.000205	0.00524625
SLC26A1	up	18.6405	2.31e-06	0.000632
HIST1H3G	up	18.6021	0.00102031	0.0120811
MAFB	up	18.3303	4.55e-05	0.0026085
QRICH1	up	18.0467	0.000238	0.00556336
ADAMTS2	up	18.005	4.31e-05	0.00255744
DLX4	up	17.7719	4.05e-05	0.00245719
THADA	up	17.7595	9.29e-05	0.00364751
MAGIX	up	17.6782	0.000134	0.00436159
DGKZ	up	17.3952	0.000241	0.00557531
C16orf58	up	16.9223	0.00167867	0.0156231
RASL10A	up	16.8697	0.000835	0.0108275
ID2	up	16.518	0.000856	0.0108947
CHSY1	up	16.2956	0.000509	0.00838604
ATF4	up	15.7147	0.000266	0.00587931
CEBPB	up	15.4797	2.86e-06	0.000675
TMEM45A	up	15.4577	0.000344	0.00675513
CYP1B1	up	15.2754	0.00290563	0.0210306
HSPBP1	up	14.9533	0.00214819	0.0179036
TNFAIP6	up	14.9448	0.00156757	0.0150633
RBM38	up	14.8006	0.00145242	0.0145536
AHNAK2	up	14.5283	0.00259504	0.0196709
CAMTA1	up	14.5015	0.000553	0.00874259
SFRP5	up	14.4808	0.000331	0.00665623
SLC25A37	up	14.2481	1.05e-05	0.00117826
FAM75A2	up	14.1458	0.000211	0.00528044
HIST1H2AG	up	14.0993	3.16e-05	0.00219242
INTS3	up	14.0426	8.91e-05	0.00357604
RCAN1	up	13.8655	0.000721	0.0100566
KIFC3	up	13.8004	0.00401696	0.0253386
TOB1	up	13.4982	6.71e-05	0.00309572
GLT8D2	up	13.4807	0.00052	0.00848976
C10orf10	up	13.3768	0.00137381	0.0140895
SC5DL	up	13.3646	0.00018	0.00490843
CCL5	up	13.1672	0.00238728	0.0188608
SCRG1	up	13.1356	5.91e-05	0.00300581
JUNB	up	13.0764	2.73e-06	0.000674
PLXNB1	up	12.7561	0.00041	0.00751344
HFE	up	12.6174	6.48e-05	0.00307012
THAP8	up	12.4834	3.89e-05	0.00244227
BCL2L10	up	12.3774	0.001295	0.0136628
HTRA1	up	12.3386	1.27e-05	0.00133072
SLFN12L	up	12.3376	0.000542	0.00866349
NDUFA4	up	12.3067	0.000769	0.0104034
C17orf49	up	12.2805	6.42e-05	0.00307012
SKP2	up	11.9987	0.00129007	0.0136351
LAMA4	up	11.9883	5.01e-05	0.0027338
MFGE8	up	11.9699	4.39e-05	0.00257618
COMMD6	up	11.9615	5.57e-05	0.00289906
ACAN	up	11.9603	0.000277	0.00600189
SAA1	up	11.9467	0.000173	0.00485238
ADAMTS13	up	11.9106	0.00501606	0.0287707
SCARA3	up	11.8319	0.000833	0.0108275
ARHGEF9	up	11.7762	4.04e-05	0.00245719
SIAH1	up	11.7385	0.000274	0.00598073
HMGCR	up	11.6596	7.33e-05	0.00324936
NRN1	up	11.6178	0.000159	0.00469479
GTF2A1	up	11.5532	0.00285177	0.020847
PMP22	up	11.5247	3.18e-06	0.000712
S100A9	up	11.4866	0.000145	0.00454083
ZCCHC3	up	11.4855	0.00163978	0.0154032
ZNF234	up	11.439	0.000557	0.00877488
FAM75C1	up	11.4111	0.00106619	0.0123543
PPP1CA	up	11.2953	0.000359	0.00690024
HMBOX1	up	11.2873	0.00216408	0.0179849
FPR1	up	11.1761	0.00136557	0.0140314
TC2N	up	11.1732	0.000762	0.0103397
HES6	up	11.0735	0.000234	0.00548682
CTSD	up	11.0477	0.000788	0.0105539
KLF4	up	11.0412	4.85e-05	0.00268549
LTBP1	up	10.969	0.00145674	0.0145624
DICER1	up	10.8935	8.78e-05	0.00357604
HMP19	up	10.7883	0.000907	0.0112393
LEPRE1	up	10.7116	0.000436	0.00772014
PDPN	up	10.6163	0.000629	0.00928593
SNAI1	up	10.4691	0.00106644	0.0123543
RNF39	up	10.4076	5.4e-05	0.00284248
ENO2	up	10.3317	0.000595	0.00911549
CSF3R	up	10.3082	0.000845	0.010867
PRELP	up	10.2998	2.08e-06	0.00062
ITGBL1	up	10.2984	4.27e-05	0.00255001
ITFG2	up	10.2921	0.00131725	0.0138193
NQO2	up	10.2861	0.000535	0.00861126
NCAN	up	10.2029	2.82e-05	0.00206703
SMAD3	up	10.1706	0.00120211	0.0132176
TXNRD1	up	10.1332	0.00100494	0.0119378
ANKRD37	up	10.0995	0.000919	0.0113038
ITGB1BP1	up	10.0252	0.000334	0.00667652
HIST1H2AD	up	9.94085	0.000739	0.0101404
HBD	up	9.92674	0.00102364	0.0120987
RMND5B	up	9.91548	0.000637	0.00934606
SIVA1	up	9.89003	0.00207416	0.0175465
SLC6A18	up	9.8736	0.011834	0.0474754
SIGMAR1	up	9.8541	5.2e-06	0.000816
SGK3	up	9.8172	0.000226	0.00541502
CEBPG	up	9.80959	0.000156	0.00466748
STARD8	up	9.58874	0.00972217	0.0422868
MEF2D	up	9.57119	2.4e-05	0.0018657
HIST1H2AB	up	9.48424	0.00135723	0.0140057
DSEL	up	9.47035	0.00284479	0.0208209
SNX6	up	9.44506	1.87e-05	0.00161572
GUSB	up	9.42714	0.000829	0.0108275
HIST1H3J	up	9.40029	0.000241	0.00557531
AP3M2	up	9.31825	0.00367543	0.0241861
FOXF1	up	9.29556	5.15e-05	0.00277279
ZFP36	up	9.2274	3.3e-05	0.00221451
TCHP	up	9.17911	0.000847	0.010867
HIST1H4D	up	9.17737	0.00153821	0.0149778
ACRV1	up	9.0891	0.00605802	0.0320668
CYTH3	up	9.07541	0.000347	0.00675513
HIST1H1A	up	9.02349	0.000913	0.0112784
MGP	up	8.96718	0.000294	0.00625939
GYPC	up	8.93994	0.00567925	0.0310133
NDUFA4L2	up	8.86768	6.2e-06	0.000916
DNAJC9	up	8.83309	0.000488	0.00815988
CHPT1	up	8.83116	0.00123825	0.0133158
RP9	up	8.81605	3.46e-06	0.000725
MFSD10	up	8.78461	0.000187	0.00499854
ANGPTL6	up	8.72643	0.000924	0.0113305
SERPINA5	up	8.67164	6.47e-05	0.00307012
FAM167A	up	8.65349	0.00516397	0.0292698
CP	up	8.62763	0.000338	0.00669327
PODN	up	8.55011	0.00046	0.00786894
LGALS3	up	8.54486	1.9e-05	0.00161868
RGS2	up	8.53678	0.00345728	0.0233167
BRI3	up	8.4945	2.3e-06	0.000632
CAMP	up	8.38962	0.000772	0.0104166
SPATA22	up	8.388	0.00103572	0.0121692
HHIPL1	up	8.37063	0.000177	0.00487991
TSHZ3	up	8.36547	0.00011	0.00392556
CRTAP	up	8.31066	0.0011876	0.0131426
CILP2	up	8.2455	5.69e-05	0.00293072
ZNF853	up	8.21383	0.00039	0.0072991
DEFA3	up	8.15703	1.98e-06	0.000604
SEMA7A	up	8.08398	0.000232	0.00546328
AEBP1	up	8.08226	0.000199	0.00545074
STARD10	up	8.07639	1.29e-05	0.0013322
BCCIP	up	8.07323	0.000177	0.00487991
LTBP2	up	8.03988	0.000182	0.0049459
POLR2C	up	8.03037	4.62e-05	0.00262997
NOL3	up	8.02055	6.63e-05	0.00309532
S100A8	up	8.00473	7.87e-05	0.00337714
TLR9	up	7.85128	0.00228002	0.0184762
HIST1H3F	up	7.83119	0.00118809	0.0131426
HIST1H2AI	up	7.8273	0.000456	0.00786176
BAMBI	up	7.81766	0.000886	0.0110628
CCDC9	up	7.73488	0.000259	0.00583513
PMVK	up	7.72862	0.00384785	0.0248514
DLGAP4	up	7.72671	0.00363432	0.024049
PPAPDC1B	up	7.71034	0.00263189	0.0198239
AP2S1	up	7.66616	0.00712003	0.0350557
PVALB	up	7.66318	0.000717	0.0100284
CHN1	up	7.65651	7.63e-05	0.00331452
GAS6	up	7.61143	0.000456	0.00786176
MAGEA6	up	7.57869	0.00188974	0.0166569
NOC3L	up	7.55857	0.00501693	0.0287707
FNDC1	up	7.55009	1.29e-06	0.000545
RPL41	up	7.5389	0.000155	0.00466434
COL2A1	up	7.45954	1.38e-05	0.00137587
SOX11	up	7.44182	0.00187824	0.0165956
HIST1H4E	up	7.44156	2.21e-05	0.00178746
NOSTRIN	up	7.42958	0.00168499	0.0156371
CD99	up	7.42007	4.27e-06	0.000743
MATK	up	7.36221	0.000278	0.00602242
EIF1	up	7.35267	1.09e-05	0.00120263
PYCR2	up	7.33109	0.000418	0.00757447
C9orf4	up	7.32689	0.000353	0.00685432
SFPQ	up	7.31823	0.000283	0.00607163
VGLL2	up	7.28643	0.00236511	0.0188044
MLEC	up	7.19898	5.93e-05	0.00300581
ABCB11	up	7.16702	0.00107519	0.0123804
ALOX15B	up	7.08619	0.000453	0.00785175
VKORC1	up	7.07443	0.000308	0.00643758
ICAM3	up	7.06797	0.00303831	0.0216168
HLA-DRB1	up	7.02826	0.00191548	0.0167732
CLEC3B	up	7.01797	5.38e-07	0.000469
SCG5	up	7.0039	0.000864	0.0109521
SYNPO	up	6.99635	0.000951	0.0115539
ZNF14	up	6.99131	0.00168312	0.0156297
FOXO1	up	6.95954	0.00172938	0.0158595
DOK2	up	6.93757	0.000907	0.0112393
TFR2	up	6.90764	0.0014554	0.0145589
POLR2J2	up	6.90605	1.09e-05	0.00120263
GPR146	up	6.8475	7.81e-05	0.00337128
CCDC97	up	6.82781	0.00534676	0.0299693
TRMT112	up	6.82489	0.000221	0.00537598
ZSWIM7	up	6.79504	0.00149027	0.0147965
PMM1	up	6.79454	0.00606896	0.0320763
METRNL	up	6.78941	0.00041	0.00751344
PAPL	up	6.77696	0.00022	0.00537598
C19orf52	up	6.76001	0.000626	0.00928562
RNF138	up	6.73462	0.0014083	0.0142971
TGFB1	up	6.71997	0.000114	0.00396072
HPN	up	6.67897	0.000213	0.00529815
SFRS8	up	6.66789	0.0102692	0.0436086
URGCP	up	6.66644	0.0020479	0.0174352
PTGER2	up	6.66053	2.97e-05	0.00213888
BAG1	up	6.64825	0.007783	0.0369339
FSTL5	up	6.6281	0.00282435	0.0207502
CRLF1	up	6.57467	1.7e-05	0.00154268
TMEM128	up	6.56345	0.000188	0.00499939
FAM180A	up	6.55833	0.00395091	0.0251289
CREB3L4	up	6.54551	0.00255308	0.0194707
PGF	up	6.54427	0.000936	0.011451
LTA	up	6.52685	0.00204639	0.0174352
HIST2H3D	up	6.49309	1.65e-06	0.00056
CCL3	up	6.48582	0.00324506	0.0224228
CHI3L2	up	6.45157	0.00235876	0.0187917
XPOT	up	6.43058	2.39e-05	0.0018657
NFKB2	up	6.42018	0.000261	0.00585323
COL9A3	up	6.41394	7.31e-05	0.00324936
NETO1	up	6.40443	0.000657	0.00956618
SAT2	up	6.40331	0.000592	0.00908932
ANO6	up	6.38821	0.000688	0.00987057
HSPA1B	up	6.38777	0.000885	0.0110628
MYBBP1A	up	6.37358	0.00162489	0.0153635
HIST1H2BF	up	6.31654	0.000208	0.00525402
KLF2	up	6.31221	0.000178	0.00487991
FST	up	6.30715	0.000288	0.00615461
CST2	up	6.27388	0.0106557	0.0445943
LYPD5	up	6.26129	0.00121912	0.0132649
KLHL21	up	6.25647	0.000251	0.00571271
S100A4	up	6.25325	7e-05	0.00316066
MXRA8	up	6.24794	0.0105539	0.0443762
SOCS6	up	6.24592	0.0010047	0.0119378
MYO1C	up	6.23437	8.6e-06	0.00112327
HIST1H2BJ	up	6.18619	5.25e-05	0.00279871
RPL15	up	6.17467	0.000158	0.00468759
C1RL	up	6.17314	0.000559	0.00878392
SLC36A2	up	6.17287	0.000122	0.00416381
ALS2CR8	up	6.16963	0.00302787	0.021581
RELL1	up	6.16468	0.000146	0.00454083
FLRT3	up	6.15586	0.0101844	0.0433836
HIST1H2AK	up	6.15379	0.000805	0.0106553
TNNT3	up	6.14984	0.000641	0.00938567
DEXI	up	6.14375	3.48e-05	0.00228484
HIST1H4B	up	6.13267	0.000104	0.00380677
NM_014621	up	6.12525	0.00108569	0.0124421
NBPF14	up	6.10903	0.000183	0.00495907
PRKAR1B	up	6.09044	0.000256	0.00580663
CRTC2	up	6.08685	0.000196	0.0051032
KIF9	up	6.08015	0.0025658	0.0195372
RPL13	up	6.05277	0.00150539	0.0147965
MARVELD1	up	6.05154	0.000302	0.00634806
FBXO7	up	5.98843	0.000458	0.00786184
QSOX1	up	5.94834	0.000439	0.00773609
TSPAN32	up	5.94304	0.000162	0.00471035
EIF6	up	5.9401	0.000145	0.00454083
MYH2	up	5.9238	0.00421531	0.0253386
HIST1H2BC	up	5.91187	1.81e-05	0.00160929
GPM6A	up	5.91171	0.0058029	0.0313666
WSB1	up	5.90619	6.68e-05	0.00309532
B3GNT7	up	5.90468	0.00119363	0.0131642
VPS28	up	5.87929	0.00608307	0.0321161
ACTG2	up	5.84707	0.000844	0.010867
HIST2H3A	up	5.84218	0.000127	0.00424569
BOD1	up	5.82943	0.000177	0.00487991
GPR25	up	5.82365	0.000176	0.00487991
ENOSF1	up	5.81721	0.00514886	0.0292181
SOCS3	up	5.81209	0.000104	0.003819
C13orf15	up	5.7956	1.07e-06	0.000492
TMBIM4	up	5.78505	0.000131	0.00431411
POSTN	up	5.78178	0.000404	0.00747976
ZNF521	up	5.77794	0.00777339	0.0369123
XCR1	up	5.776	0.000168	0.00479518
LTBP4	up	5.7633	1.31e-05	0.00133777
CMTM5	up	5.7595	0.00245365	0.0190164
CITED2	up	5.75043	0.000194	0.00508208
MINA	up	5.72722	0.000166	0.00479518
SPAG4	up	5.71002	0.00170216	0.0157168
CELF6	up	5.68645	2.3e-05	0.00184016
GLTP	up	5.68537	0.00121998	0.0132649
TNPO2	up	5.67857	0.000219	0.0053722
PLCXD3	up	5.6773	0.000545	0.00866771
FAM162A	up	5.64532	0.000216	0.00534068
CETN2	up	5.63898	0.00181697	0.0163438
AMPH	up	5.63555	0.00371396	0.0243531
SNX15	up	5.61114	7.46e-05	0.0032796
TMEM57	up	5.57855	0.000416	0.00756366
ZFX	up	5.5782	2.94e-05	0.0021318
TUSC3	up	5.56539	0.0026482	0.0199057
C1orf21	up	5.55544	0.0009	0.0111868
PKN1	up	5.5456	0.00534573	0.0299693
C6orf225	up	5.51754	0.0011615	0.0129547
UBE2G2	up	5.46848	0.00106931	0.0123672
ANKH	up	5.4645	0.0012376	0.0133158
ST6GALNAC4	up	5.45321	6.78e-05	0.00311972
RNF19B	up	5.41714	0.00821936	0.0380907
PDE4DIP	up	5.40169	0.000226	0.00541502
ANGPTL4	up	5.40079	0.000555	0.00875318
EIF4A2	up	5.39848	4.81e-05	0.00268549
ITGAM	up	5.3964	0.000177	0.00487991
FUT3	up	5.37169	2.31e-05	0.00184016
HIST1H2BK	up	5.36831	9.84e-05	0.00374174
DOK3	up	5.36471	0.000428	0.00764419
PPAP2B	up	5.3537	0.00161811	0.0153432
BCL2L2	up	5.30725	2.37e-05	0.00186337
BBC3	up	5.30452	0.000345	0.00675513
MRO	up	5.25777	0.00380148	0.0246826
PCBP1	up	5.25448	5.66e-05	0.00292873
NXF3	up	5.24747	0.000305	0.00638121
LPAR4	up	5.24731	0.00116676	0.0129853
PPP2R2B	up	5.23345	0.000952	0.0115576
CLNS1A	up	5.23153	0.00332437	0.0227433
HIST1H2BB	up	5.22222	6.04e-05	0.00300581
ZNF22	up	5.19467	0.00209654	0.017669
ECM1	up	5.18853	0.00130516	0.013722
FN1	up	5.18687	0.00443793	0.0267611
NR1H3	up	5.15831	0.000223	0.00539634
ENO1	up	5.11471	0.000229	0.00545074
MLPH	up	5.10011	0.00234396	0.0187554
PRM2	up	5.08798	9.36e-06	0.00114763
C7orf11	up	5.06925	0.000853	0.01089
SELPLG	up	5.06026	0.000426	0.00762908
MBP	up	5.05338	1.03e-05	0.00117826
C14orf179	up	5.03534	0.00371413	0.0243531
GSX2	up	5.03409	8.78e-05	0.00357604
CDK2AP1	up	5.01461	0.000156	0.00466748
FOS	up	5.00106	0.000216	0.00534068
STX8	up	5.00073	0.00338817	0.023031
CAPS	up	4.99918	8.48e-05	0.00351644
SAE1	up	4.9969	0.000667	0.00964625
SFT2D3	up	4.99419	0.00627953	0.032705
TNNC2	up	4.9848	0.00603371	0.0320437
RPS29	up	4.97443	2.95e-06	0.000686
SLC22A1	up	4.95326	0.00609456	0.0321651
SMARCD3	up	4.95301	0.000112	0.00393428
UBXN11	up	4.86043	0.000438	0.00773609
CATSPER2	up	4.85714	0.00479845	0.0279337
PRDX2	up	4.85359	1.95e-05	0.00162092
CDC23	up	4.84777	0.00182388	0.0163547
RUFY1	up	4.83438	0.00045	0.00782832
COL11A2	up	4.82975	0.000774	0.0104337
HNRNPH3	up	4.81957	0.00250908	0.0193164
CCDC91	up	4.81178	0.000969	0.011696
RAB6C	up	4.78825	1.71e-05	0.00154605
RAB28	up	4.77357	0.00678013	0.0341215
CRIP1	up	4.76819	0.00113922	0.0128052
UNC50	up	4.76533	0.000879	0.0110628
KLHL5	up	4.7649	0.000509	0.00838604
TRPV5	up	4.72591	0.00232623	0.0186954
KCTD12	up	4.72496	0.000964	0.0116546
VMA21	up	4.71679	0.00247148	0.0191174
IER2	up	4.70523	0.000563	0.00879986
HIST2H2AB	up	4.70115	8.94e-05	0.00357663
C7orf57	up	4.7011	3.12e-05	0.00217598
HADH	up	4.69979	0.000332	0.00666197
KDELR3	up	4.68074	1.89e-05	0.00161572
AMZ2	up	4.68032	0.00243748	0.0189862
DARS	up	4.67638	4.13e-05	0.00249671
JUN	up	4.67038	0.00012	0.00410354
COMP	up	4.66833	0.000345	0.00675513
HLA-DRB5	up	4.6652	1.57e-05	0.00144986
POM121	up	4.66236	0.00326011	0.022489
GNG4	up	4.6555	0.000304	0.00637098
NUDT6	up	4.6503	9.56e-05	0.00369277
PLOD1	up	4.63831	0.000325	0.00660677
BNIP3L	up	4.62788	0.000188	0.00499888
TRPV4	up	4.61863	0.000718	0.0100284
CLK1	up	4.56877	1.96e-05	0.00162092
PRDX6	up	4.56593	0.000224	0.00540821
LANCL1	up	4.54838	0.000658	0.00956618
RPL36	up	4.54196	0.000944	0.0114989
COPZ2	up	4.51413	0.000174	0.00487991
SNX8	up	4.51123	0.000117	0.00403752
LFNG	up	4.50227	6.09e-05	0.00300581
H2AFV	up	4.47629	0.00333972	0.022797
HIST2H2AA4	up	4.47093	0.000334	0.00667652
CES2	up	4.46573	0.00118584	0.0131426
CST3	up	4.46145	0.00662318	0.0336726
HIST1H2BE	up	4.45517	0.000194	0.00508134
FAM50B	up	4.44994	0.000297	0.00629771
IVNS1ABP	up	4.43551	0.000514	0.00845321
BTRC	up	4.4349	0.00151387	0.0148217
YBX1	up	4.42993	3.98e-05	0.00245719
PPP2R1A	up	4.42455	3.61e-06	0.000725
SEC22C	up	4.424	0.000228	0.00545074
TIMP1	up	4.39762	0.00019	0.00501449
RABGGTA	up	4.39303	4.04e-05	0.00245719
H1FX	up	4.38998	0.000108	0.00390677
SPARC	up	4.37871	4.98e-06	0.000806
RNF166	up	4.37341	0.00128301	0.0136163
ATHL1	up	4.37251	9.12e-05	0.00361647
CLTA	up	4.36997	4.46e-05	0.00259253
MKNK2	up	4.36916	0.00105961	0.0123453
FMOD	up	4.36685	0.000436	0.00772014

## Sheet: Supplementary Table 4
Supplementary Table 4. The potential target mRNAs of miR-221-3p predicted by ENCORI.
miRNAid	miRNAname	geneID	geneName	geneType	chromosome	narrowStart	narrowEnd	broadStart	broadEnd	strand	clipExpNum	degraExpNum	RBP	PITA	RNA22	miRmap	microT	miRanda	PicTar	TargetScan	pancancerNum
MIMAT0000278	hsa-miR-221-3p	ENSG00000277203	F8A1	protein_coding	chrX	154116032	154116052	154116032	154116052	+	4	0	AGO1-4	0	0	0	0	1	0	0	5
MIMAT0000278	hsa-miR-221-3p	ENSG00000188290	HES4	protein_coding	chr1	934368	934373	934368	934373	-	8	0	AGO1-4,AGO2	1	0	0	0	0	0	0	11
MIMAT0000278	hsa-miR-221-3p	ENSG00000160087	UBE2J2	protein_coding	chr1	1190334	1190339	1190334	1190339	-	8	0	AGO1-4,AGO2	1	0	0	0	0	0	0	8
MIMAT0000278	hsa-miR-221-3p	ENSG00000008130	NADK	protein_coding	chr1	1684222	1684227	1684222	1684227	-	2	0	AGO1-4,AGO2	1	0	0	0	0	0	0	8
MIMAT0000278	hsa-miR-221-3p	ENSG00000078369	GNB1	protein_coding	chr1	1718041	1718046	1718041	1718046	-	9	0	AGO1,AGO1-4,AGO2	1	0	0	0	0	0	0	5
MIMAT0000278	hsa-miR-221-3p	ENSG00000116254	CHD5	protein_coding	chr1	6161929	6161934	6161929	6161934	-	1	0	AGO2	1	0	0	0	0	0	0	9
MIMAT0000278	hsa-miR-221-3p	ENSG00000162413	KLHL21	protein_coding	chr1	6651733	6651738	6651733	6651738	-	2	0	AGO1-4,AGO2	1	0	0	0	0	0	0	2
MIMAT0000278	hsa-miR-221-3p	ENSG00000171603	CLSTN1	protein_coding	chr1	9789225	9789230	9789225	9789230	-	7	0	AGO1,AGO1-4,AGO2	1	0	0	0	0	0	0	4
MIMAT0000278	hsa-miR-221-3p	ENSG00000130940	CASZ1	protein_coding	chr1	10697202	10697207	10697201	10697229	-	4	0	AGO1-4	1	0	1	1	1	1	1	11
MIMAT0000278	hsa-miR-221-3p	ENSG00000198793	MTOR	protein_coding	chr1	11166661	11166668	11166660	11166682	-	3	0	AGO2	1	0	0	0	1	0	0	8
MIMAT0000278	hsa-miR-221-3p	ENSG00000177000	MTHFR	protein_coding	chr1	11848180	11848185	11848180	11848185	-	3	0	AGO1-4,AGO2	1	0	0	0	0	0	0	6
MIMAT0000278	hsa-miR-221-3p	ENSG00000159363	ATP13A2	protein_coding	chr1	17312479	17312486	17312479	17312486	-	3	0	AGO1-4,AGO2	1	0	0	0	0	0	0	8
MIMAT0000278	hsa-miR-221-3p	ENSG00000179051	RCC2	protein_coding	chr1	17734075	17734081	17734075	17734081	-	17	0	AGO1,AGO1-4,AGO2	1	0	0	0	0	0	0	7
MIMAT0000278	hsa-miR-221-3p	ENSG00000053371	AKR7A2	protein_coding	chr1	19630484	19630489	19630484	19630489	-	2	0	AGO1-4	1	0	0	0	0	0	0	13
MIMAT0000278	hsa-miR-221-3p	ENSG00000162542	TMCO4	protein_coding	chr1	20008778	20008783	20008778	20008783	-	1	0	AGO2	1	0	0	0	0	0	0	6
MIMAT0000278	hsa-miR-221-3p	ENSG00000127483	HP1BP3	protein_coding	chr1	21069357	21069362	21069357	21069362	-	3	0	AGO1-4,AGO2	1	0	0	0	0	0	0	8
MIMAT0000278	hsa-miR-221-3p	ENSG00000090686	USP48	protein_coding	chr1	22054893	22054898	22054892	22054920	-	4	0	AGO1-4,AGO2	1	0	0	0	1	0	0	8
MIMAT0000278	hsa-miR-221-3p	ENSG00000007968	E2F2	protein_coding	chr1	23834830	23834835	23834829	23834835	-	6	0	AGO1-4,AGO2	1	0	0	0	0	1	1	8
MIMAT0000278	hsa-miR-221-3p	ENSG00000188529	SRSF10	protein_coding	chr1	24295788	24295793	24295787	24295809	-	1	0	AGO2	0	0	1	0	1	0	1	11
MIMAT0000278	hsa-miR-221-3p	ENSG00000117632	STMN1	protein_coding	chr1	26226609	26226614	26226608	26226636	-	11	0	AGO1,AGO1-4,AGO2	1	0	1	1	1	0	0	5
MIMAT0000278	hsa-miR-221-3p	ENSG00000158195	WASF2	protein_coding	chr1	27733096	27733101	27733096	27733101	-	5	0	AGO1-4	1	0	1	0	0	0	0	4
MIMAT0000278	hsa-miR-221-3p	ENSG00000160058	BSDC1	protein_coding	chr1	32830849	32830854	32830849	32830854	-	7	0	AGO1-4,AGO2	1	0	0	0	0	0	0	8
MIMAT0000278	hsa-miR-221-3p	ENSG00000116525	TRIM62	protein_coding	chr1	33612577	33612582	33612577	33612582	-	1	0	AGO1-4	1	0	1	0	0	0	0	9
MIMAT0000278	hsa-miR-221-3p	ENSG00000134686	PHC2	protein_coding	chr1	33789806	33789811	33789805	33789811	-	10	0	AGO1-4,AGO2	1	0	0	0	0	1	0	5
MIMAT0000278	hsa-miR-221-3p	ENSG00000188786	MTF1	protein_coding	chr1	38277069	38277074	38277069	38277074	-	5	0	AGO1-4,AGO2	1	0	0	0	0	0	0	5
MIMAT0000278	hsa-miR-221-3p	ENSG00000183431	SF3A3	protein_coding	chr1	38423841	38423857	38423841	38423857	-	1	0	AGO1	0	0	0	0	1	0	0	5
MIMAT0000278	hsa-miR-221-3p	ENSG00000131238	PPT1	protein_coding	chr1	40538581	40538586	40538581	40538586	-	7	0	AGO1-4,AGO2	1	0	0	0	0	0	0	9
MIMAT0000278	hsa-miR-221-3p	ENSG00000117016	RIMS3	protein_coding	chr1	41087765	41087770	41087764	41087792	-	3	0	AGO1-4,AGO2	1	0	1	1	1	1	1	10
MIMAT0000278	hsa-miR-221-3p	ENSG00000198815	FOXJ3	protein_coding	chr1	42645156	42645162	42645156	42645162	-	8	0	AGO1-4,AGO2	1	0	0	0	0	0	0	8
MIMAT0000278	hsa-miR-221-3p	ENSG00000196517	SLC6A9	protein_coding	chr1	44462246	44462251	44462246	44462251	-	13	0	AGO1,AGO1-4,AGO2	1	0	0	0	0	0	0	2
MIMAT0000278	hsa-miR-221-3p	ENSG00000159658	EFCAB14	protein_coding	chr1	47144027	47144032	47144026	47144054	-	8	0	AGO1,AGO1-4,AGO2	1	0	1	1	0	0	0	9
MIMAT0000278	hsa-miR-221-3p	ENSG00000123473	STIL	protein_coding	chr1	47716467	47716472	47716467	47716472	-	1	0	AGO1-4	1	0	0	0	0	0	0	4
MIMAT0000278	hsa-miR-221-3p	ENSG00000269113	TRABD2B	protein_coding	chr1	48226232	48226238	48226232	48226238	-	1	0	AGO2	0	0	0	0	0	1	1	14
MIMAT0000278	hsa-miR-221-3p	ENSG00000085831	TTC39A	protein_coding	chr1	51753651	51753658	51753651	51753658	-	2	0	AGO1-4	1	0	0	0	0	0	0	10
MIMAT0000278	hsa-miR-221-3p	ENSG00000085832	EPS15	protein_coding	chr1	51820140	51820145	51820140	51820145	-	1	0	AGO1-4	1	0	0	0	0	0	0	6
MIMAT0000278	hsa-miR-221-3p	ENSG00000117862	TXNDC12	protein_coding	chr1	52485901	52485906	52485901	52485906	-	4	0	AGO2	1	0	0	0	0	0	0	11
MIMAT0000278	hsa-miR-221-3p	ENSG00000162377	COA7	protein_coding	chr1	53153267	53153272	53153267	53153272	-	3	0	AGO2	1	0	0	0	0	0	0	4
MIMAT0000278	hsa-miR-221-3p	ENSG00000116209	TMEM59	protein_coding	chr1	54497593	54497598	54497592	54497614	-	6	0	AGO1,AGO1-4,AGO2	1	0	0	0	1	0	0	9
MIMAT0000278	hsa-miR-221-3p	ENSG00000157216	SSBP3	protein_coding	chr1	54692231	54692236	54692230	54692251	-	4	0	AGO1-4,AGO2	1	0	0	0	1	0	0	10
MIMAT0000278	hsa-miR-221-3p	ENSG00000116133	DHCR24	protein_coding	chr1	55315702	55315707	55315702	55315707	-	1	0	AGO1-4	1	0	0	0	0	0	0	7
MIMAT0000278	hsa-miR-221-3p	ENSG00000162407	PLPP3	protein_coding	chr1	56960513	56960518	56960512	56960534	-	3	0	AGO2	1	0	0	0	1	0	0	11
MIMAT0000278	hsa-miR-221-3p	ENSG00000142864	SERBP1	protein_coding	chr1	67873694	67873699	67873694	67873699	-	7	0	AGO1-4,AGO2	1	0	0	0	0	0	0	7
MIMAT0000278	hsa-miR-221-3p	ENSG00000172380	GNG12	protein_coding	chr1	68169102	68169108	68169101	68169123	-	4	0	AGO1,AGO2	1	0	1	0	1	0	0	6
MIMAT0000278	hsa-miR-221-3p	ENSG00000162595	DIRAS3	protein_coding	chr1	68512252	68512257	68512251	68512279	-	1	1	AGO2	1	0	1	1	0	0	0	11
MIMAT0000278	hsa-miR-221-3p	ENSG00000116729	WLS	protein_coding	chr1	68591628	68591633	68591627	68591633	-	1	0	AGO1-4	1	0	0	0	0	0	1	6
MIMAT0000278	hsa-miR-221-3p	ENSG00000024526	DEPDC1	protein_coding	chr1	68942546	68942552	68942545	68942573	-	1	0	AGO1-4	1	0	1	1	1	0	0	4
MIMAT0000278	hsa-miR-221-3p	ENSG00000172260	NEGR1	protein_coding	chr1	71872248	71872253	71872248	71872253	-	1	0	AGO2	1	0	0	0	0	0	0	13
MIMAT0000278	hsa-miR-221-3p	ENSG00000055732	MCOLN3	protein_coding	chr1	85484762	85484767	85484762	85484767	-	2	0	AGO1-4,AGO2	1	0	0	0	0	0	0	3
MIMAT0000278	hsa-miR-221-3p	ENSG00000097096	SYDE2	protein_coding	chr1	85624092	85624097	85624092	85624097	-	3	0	AGO1-4,AGO2	1	0	0	0	0	0	0	14
MIMAT0000278	hsa-miR-221-3p	ENSG00000183291	SELENOF	protein_coding	chr1	87328619	87328624	87328619	87328624	-	12	0	AGO1,AGO1-4,AGO2,AGO3	1	0	0	0	0	0	0	8
MIMAT0000278	hsa-miR-221-3p	ENSG00000137947	GTF2B	protein_coding	chr1	89318688	89318693	89318687	89318709	-	5	0	AGO1-4,AGO2	1	0	0	0	1	0	1	6
MIMAT0000278	hsa-miR-221-3p	ENSG00000162654	GBP4	protein_coding	chr1	89649499	89649504	89649499	89649504	-	1	0	AGO1	1	0	0	0	0	0	0	3
MIMAT0000278	hsa-miR-221-3p	ENSG00000069702	TGFBR3	protein_coding	chr1	92148223	92148228	92148223	92148228	-	2	0	AGO1-4,AGO2	1	0	0	0	0	0	0	10
MIMAT0000278	hsa-miR-221-3p	ENSG00000174842	GLMN	protein_coding	chr1	92711971	92711977	92711970	92711993	-	1	0	AGO2	1	0	1	0	1	0	0	8
MIMAT0000278	hsa-miR-221-3p	ENSG00000067208	EVI5	protein_coding	chr1	92977365	92977370	92977365	92977370	-	2	0	AGO2	1	0	0	0	0	0	0	6
MIMAT0000278	hsa-miR-221-3p	ENSG00000117500	TMED5	protein_coding	chr1	93617787	93617794	93617786	93617809	-	9	0	AGO1-4,AGO2	1	0	0	0	1	0	0	6
MIMAT0000278	hsa-miR-221-3p	ENSG00000137992	DBT	protein_coding	chr1	100660777	100660784	100660777	100660784	-	1	0	AGO2	1	0	0	0	0	0	0	13
MIMAT0000278	hsa-miR-221-3p	ENSG00000134215	VAV3	protein_coding	chr1	108114518	108114523	108114518	108114523	-	1	0	AGO1-4	1	0	1	0	0	0	0	8
MIMAT0000278	hsa-miR-221-3p	ENSG00000085433	WDR47	protein_coding	chr1	109512926	109512931	109512925	109512953	-	4	0	AGO1-4,AGO2	1	0	1	1	1	1	1	9
MIMAT0000278	hsa-miR-221-3p	ENSG00000197780	TAF13	protein_coding	chr1	109606804	109606809	109606804	109606809	-	1	0	AGO1-4	0	0	1	0	0	0	0	6
MIMAT0000278	hsa-miR-221-3p	ENSG00000134243	SORT1	protein_coding	chr1	109855256	109855262	109855255	109855277	-	3	0	AGO1-4,AGO2	1	0	1	0	1	0	0	9
MIMAT0000278	hsa-miR-221-3p	ENSG00000116455	WDR77	protein_coding	chr1	111983508	111983514	111983507	111983535	-	5	0	AGO1,AGO1-4,AGO2	1	0	1	1	1	0	0	4
MIMAT0000278	hsa-miR-221-3p	ENSG00000081019	RSBN1	protein_coding	chr1	114304571	114304576	114304571	114304576	-	4	0	AGO1-4,AGO2	1	0	0	0	0	0	0	10
MIMAT0000278	hsa-miR-221-3p	ENSG00000009307	CSDE1	protein_coding	chr1	115259835	115259840	115259835	115259840	-	11	0	AGO1-4,AGO2	1	0	0	0	0	0	0	6
MIMAT0000278	hsa-miR-221-3p	ENSG00000052723	SIKE1	protein_coding	chr1	115313863	115313868	115313863	115313868	-	1	0	AGO1-4	1	0	0	0	0	0	0	10
MIMAT0000278	hsa-miR-221-3p	ENSG00000143061	IGSF3	protein_coding	chr1	117117233	117117238	117117232	117117238	-	2	0	AGO1-4,AGO2	1	0	0	0	0	0	1	13
MIMAT0000278	hsa-miR-221-3p	ENSG00000116874	WARS2	protein_coding	chr1	119575381	119575386	119575381	119575386	-	1	0	AGO1-4	1	0	0	0	0	0	0	9
MIMAT0000278	hsa-miR-221-3p	ENSG00000143067	ZNF697	protein_coding	chr1	120163893	120163898	120163892	120163915	-	3	0	AGO1-4,AGO2	1	0	0	0	1	0	0	6
MIMAT0000278	hsa-miR-221-3p	ENSG00000134250	NOTCH2	protein_coding	chr1	120457428	120457433	120457428	120457433	-	13	0	AGO1-4,AGO2	1	0	0	0	0	0	0	9
MIMAT0000278	hsa-miR-221-3p	ENSG00000178104	PDE4DIP	protein_coding	chr1	144851886	144851891	144851886	144851891	-	1	0	AGO1-4	1	0	0	0	0	0	0	11
MIMAT0000278	hsa-miR-221-3p	ENSG00000131791	PRKAB2	protein_coding	chr1	146627269	146627275	146627268	146627293	-	15	0	AGO1,AGO1-4,AGO2	1	0	0	0	1	0	0	13
MIMAT0000278	hsa-miR-221-3p	ENSG00000159164	SV2A	protein_coding	chr1	149875290	149875295	149875290	149875295	-	4	0	AGO2	1	0	0	0	0	0	0	14
MIMAT0000278	hsa-miR-221-3p	ENSG00000143368	SF3B4	protein_coding	chr1	149895358	149895363	149895358	149895363	-	3	0	AGO1-4,AGO2	1	0	0	0	0	0	0	8
MIMAT0000278	hsa-miR-221-3p	ENSG00000143457	GOLPH3L	protein_coding	chr1	150620347	150620353	150620346	150620374	-	4	0	AGO1-4,AGO2	1	0	1	1	1	0	0	15
MIMAT0000278	hsa-miR-221-3p	ENSG00000143437	ARNT	protein_coding	chr1	150782608	150782613	150782607	150782635	-	10	2	AGO1-4,AGO2	1	0	0	1	1	1	1	17
MIMAT0000278	hsa-miR-221-3p	ENSG00000143418	CERS2	protein_coding	chr1	150937995	150938000	150937995	150938000	-	13	0	AGO1-4,AGO2	1	0	0	0	0	0	0	13
MIMAT0000278	hsa-miR-221-3p	ENSG00000163155	LYSMD1	protein_coding	chr1	151132418	151132423	151132417	151132423	-	8	0	AGO1,AGO1-4,AGO2,AGO3	1	0	0	0	0	0	1	20
MIMAT0000278	hsa-miR-221-3p	ENSG00000143390	RFX5	protein_coding	chr1	151313771	151313776	151313771	151313776	-	2	0	AGO1-4,AGO2	1	0	0	0	0	0	0	8
MIMAT0000278	hsa-miR-221-3p	ENSG00000143416	SELENBP1	protein_coding	chr1	151337036	151337059	151337036	151337059	-	1	0	AGO1-4	0	0	0	0	1	0	0	13
MIMAT0000278	hsa-miR-221-3p	ENSG00000143442	POGZ	protein_coding	chr1	151378217	151378245	151378217	151378245	-	9	0	AGO1-4,AGO2	0	0	0	1	0	0	0	18
MIMAT0000278	hsa-miR-221-3p	ENSG00000182134	TDRKH	protein_coding	chr1	151746861	151746866	151746860	151746866	-	3	0	AGO1-4,AGO2	1	0	0	0	0	1	0	13
MIMAT0000278	hsa-miR-221-3p	ENSG00000143549	TPM3	protein_coding	chr1	154129802	154129807	154129801	154129823	-	7	0	AGO1-4,AGO2	1	0	0	0	1	0	1	9
MIMAT0000278	hsa-miR-221-3p	ENSG00000163346	PBXIP1	protein_coding	chr1	154916711	154916717	154916710	154916731	-	1	2	AGO1-4	1	0	0	0	1	0	0	12
MIMAT0000278	hsa-miR-221-3p	ENSG00000116539	ASH1L	protein_coding	chr1	155451873	155451878	155451873	155451878	-	4	0	AGO1-4,AGO2	0	0	1	0	0	0	0	14
MIMAT0000278	hsa-miR-221-3p	ENSG00000143622	RIT1	protein_coding	chr1	155867927	155867932	155867927	155867934	-	12	0	AGO1-4,AGO2	1	0	1	0	0	0	0	13
MIMAT0000278	hsa-miR-221-3p	ENSG00000254726	MEX3A	protein_coding	chr1	156044134	156044139	156044133	156044156	-	17	0	AGO1,AGO1-4,AGO2	1	0	0	0	1	1	1	15
MIMAT0000278	hsa-miR-221-3p	ENSG00000116604	MEF2D	protein_coding	chr1	156435501	156435508	156435501	156435508	-	1	0	AGO1-4	1	0	0	0	0	0	0	13
MIMAT0000278	hsa-miR-221-3p	ENSG00000143320	CRABP2	protein_coding	chr1	156669456	156669461	156669456	156669461	-	3	0	AGO1-4	1	0	0	0	0	0	0	4
MIMAT0000278	hsa-miR-221-3p	ENSG00000143321	HDGF	protein_coding	chr1	156712194	156712199	156712193	156712221	-	24	0	AGO1,AGO1-4,AGO2,AGO3	1	0	0	1	0	0	0	8
MIMAT0000278	hsa-miR-221-3p	ENSG00000117036	ETV3	protein_coding	chr1	157094571	157094576	157094570	157094598	-	12	0	AGO1,AGO2	0	0	1	1	1	1	1	9
MIMAT0000278	hsa-miR-221-3p	ENSG00000162739	SLAMF6	protein_coding	chr1	160455322	160455328	160455321	160455349	-	4	0	AGO2	1	0	0	0	1	0	0	5
MIMAT0000278	hsa-miR-221-3p	ENSG00000066294	CD84	protein_coding	chr1	160516606	160516611	160516606	160516611	-	1	0	AGO1-4	1	0	0	0	0	0	0	6
MIMAT0000278	hsa-miR-221-3p	ENSG00000143183	TMCO1	protein_coding	chr1	165697189	165697194	165697189	165697194	-	2	0	AGO1-4,AGO2	1	0	0	0	0	0	0	15
MIMAT0000278	hsa-miR-221-3p	ENSG00000235750	KIAA0040	protein_coding	chr1	175128159	175128165	175128158	175128180	-	4	0	AGO2	0	0	1	0	1	0	0	5
MIMAT0000278	hsa-miR-221-3p	ENSG00000135823	STX6	protein_coding	chr1	180945227	180945232	180945227	180945232	-	1	0	AGO1-4	1	0	0	0	0	0	0	7
MIMAT0000278	hsa-miR-221-3p	ENSG00000116406	EDEM3	protein_coding	chr1	184661190	184661195	184661190	184661195	-	3	0	AGO1-4,AGO2	1	0	0	0	0	0	0	11
MIMAT0000278	hsa-miR-221-3p	ENSG00000177888	ZBTB41	protein_coding	chr1	197128094	197128100	197128094	197128100	-	2	0	AGO1-4,AGO2	1	0	0	0	0	0	0	11
MIMAT0000278	hsa-miR-221-3p	ENSG00000213047	DENND1B	protein_coding	chr1	197474745	197474750	197474744	197474772	-	5	0	AGO1-4,AGO2	0	0	1	1	0	0	0	6
MIMAT0000278	hsa-miR-221-3p	ENSG00000118193	KIF14	protein_coding	chr1	200521770	200521775	200521770	200521775	-	2	0	AGO1-4,AGO2	1	0	1	0	0	0	0	7
MIMAT0000278	hsa-miR-221-3p	ENSG00000117139	KDM5B	protein_coding	chr1	202696823	202696828	202696823	202696828	-	2	0	AGO2	1	0	0	0	0	0	0	18
MIMAT0000278	hsa-miR-221-3p	ENSG00000159346	ADIPOR1	protein_coding	chr1	202910269	202910274	202910268	202910290	-	15	1	AGO1,AGO1-4,AGO2	1	0	0	0	1	1	0	10
MIMAT0000278	hsa-miR-221-3p	ENSG00000159348	CYB5R1	protein_coding	chr1	202931497	202931502	202931497	202931502	-	3	0	AGO1-4,AGO2	1	0	0	0	0	0	0	9
MIMAT0000278	hsa-miR-221-3p	ENSG00000143850	PLEKHA6	protein_coding	chr1	204190536	204190542	204190535	204190563	-	3	0	AGO1-4	1	0	0	1	0	0	1	9
MIMAT0000278	hsa-miR-221-3p	ENSG00000158615	PPP1R15B	protein_coding	chr1	204372785	204372790	204372784	204372812	-	23	0	AGO1,AGO1-4,AGO2	1	0	0	1	1	1	1	13
MIMAT0000278	hsa-miR-221-3p	ENSG00000133056	PIK3C2B	protein_coding	chr1	204391892	204391897	204391892	204391897	-	3	0	AGO1-4,AGO2	1	0	0	0	0	0	0	12
MIMAT0000278	hsa-miR-221-3p	ENSG00000158711	ELK4	protein_coding	chr1	205582775	205582780	205582775	205582780	-	1	0	AGO1-4	0	0	1	0	0	0	0	7
MIMAT0000278	hsa-miR-221-3p	ENSG00000158715	SLC45A3	protein_coding	chr1	205627920	205627927	205627919	205627946	-	2	0	AGO2	1	0	0	0	1	0	0	6
MIMAT0000278	hsa-miR-221-3p	ENSG00000180667	YOD1	protein_coding	chr1	207218011	207218017	207218010	207218032	-	4	0	AGO2	1	0	0	0	1	0	1	7
MIMAT0000278	hsa-miR-221-3p	ENSG00000196878	LAMB3	protein_coding	chr1	209788476	209788481	209788476	209788481	-	1	0	AGO2	1	0	0	0	0	0	0	2
MIMAT0000278	hsa-miR-221-3p	ENSG00000143473	KCNH1	protein_coding	chr1	210855655	210855661	210855655	210855674	-	1	0	AGO1-4	0	1	0	0	0	1	0	7
MIMAT0000278	hsa-miR-221-3p	ENSG00000123684	LPGAT1	protein_coding	chr1	211918969	211918974	211918969	211918974	-	4	0	AGO1-4,AGO2	1	0	0	0	0	0	0	10
MIMAT0000278	hsa-miR-221-3p	ENSG00000117697	NSL1	protein_coding	chr1	212911442	212911447	212911442	212911447	-	2	0	AGO2	1	0	1	0	0	0	0	20
MIMAT0000278	hsa-miR-221-3p	ENSG00000186063	AIDA	protein_coding	chr1	222841509	222841514	222841508	222841528	-	3	0	AGO1-4,AGO2	1	0	1	0	1	0	1	11
MIMAT0000278	hsa-miR-221-3p	ENSG00000143514	TP53BP2	protein_coding	chr1	223968446	223968452	223968445	223968473	-	4	0	AGO1,AGO1-4,AGO2	1	0	1	1	1	0	0	10
MIMAT0000278	hsa-miR-221-3p	ENSG00000162923	WDR26	protein_coding	chr1	224575961	224575966	224575961	224575966	-	2	0	AGO1-4,AGO2	1	0	0	0	0	0	0	11
MIMAT0000278	hsa-miR-221-3p	ENSG00000143815	LBR	protein_coding	chr1	225590440	225590445	225590439	225590467	-	23	0	AGO1-4,AGO2	1	0	1	1	0	0	0	12
MIMAT0000278	hsa-miR-221-3p	ENSG00000154380	ENAH	protein_coding	chr1	225681378	225681384	225681377	225681405	-	5	0	AGO1-4,AGO2	1	0	0	1	0	0	0	13
MIMAT0000278	hsa-miR-221-3p	ENSG00000143799	PARP1	protein_coding	chr1	226589694	226589700	226589694	226589700	-	1	0	AGO1-4	0	0	1	0	0	0	0	18
MIMAT0000278	hsa-miR-221-3p	ENSG00000143776	CDC42BPA	protein_coding	chr1	227179545	227179550	227179545	227179550	-	1	0	AGO1-4	1	0	1	0	0	0	0	8
MIMAT0000278	hsa-miR-221-3p	ENSG00000154429	CCSAP	protein_coding	chr1	229457361	229457367	229457360	229457382	-	22	0	AGO1,AGO1-4,AGO2	1	0	1	0	1	0	0	4
MIMAT0000278	hsa-miR-221-3p	ENSG00000119280	C1orf198	protein_coding	chr1	230974989	230974995	230974988	230975009	-	10	0	AGO1-4,AGO2	1	0	1	0	1	0	0	12
MIMAT0000278	hsa-miR-221-3p	ENSG00000116903	EXOC8	protein_coding	chr1	231470872	231470878	231470872	231470878	-	7	0	AGO1,AGO1-4,AGO2,AGO3	1	0	0	0	0	0	0	8
MIMAT0000278	hsa-miR-221-3p	ENSG00000116991	SIPA1L2	protein_coding	chr1	232534748	232534753	232534748	232534753	-	1	0	AGO1-4	1	0	0	0	0	0	0	12
MIMAT0000278	hsa-miR-221-3p	ENSG00000173726	TOMM20	protein_coding	chr1	235272988	235272993	235272988	235272993	-	3	0	AGO1-4,AGO2	1	0	0	0	0	0	0	11
MIMAT0000278	hsa-miR-221-3p	ENSG00000162885	B3GALNT2	protein_coding	chr1	235613325	235613330	235613325	235613330	-	13	0	AGO1-4,AGO2	1	0	0	0	0	0	0	12
MIMAT0000278	hsa-miR-221-3p	ENSG00000143669	LYST	protein_coding	chr1	235824423	235824428	235824423	235824428	-	3	0	AGO2	1	0	0	0	0	0	0	8
MIMAT0000278	hsa-miR-221-3p	ENSG00000180875	GREM2	protein_coding	chr1	240653993	240653998	240653993	240653998	-	1	0	AGO1-4	1	0	0	0	0	0	0	13
MIMAT0000278	hsa-miR-221-3p	ENSG00000153187	HNRNPU	protein_coding	chr1	245014263	245014268	245014263	245014268	-	4	0	AGO2	1	0	0	0	0	0	0	12
MIMAT0000278	hsa-miR-221-3p	ENSG00000158109	TPRG1L	protein_coding	chr1	3546519	3546524	3546519	3546524	+	3	0	AGO1-4,AGO2	1	0	0	0	0	0	0	4
MIMAT0000278	hsa-miR-221-3p	ENSG00000171735	CAMTA1	protein_coding	chr1	7827407	7827413	7827392	7827414	+	4	0	AGO1-4,AGO2	1	0	0	0	1	0	1	3
MIMAT0000278	hsa-miR-221-3p	ENSG00000049245	VAMP3	protein_coding	chr1	7840705	7840710	7840705	7840710	+	2	0	AGO1-4	1	0	0	0	0	0	0	3
MIMAT0000278	hsa-miR-221-3p	ENSG00000188807	TMEM201	protein_coding	chr1	9662556	9662561	9662556	9662561	+	4	0	AGO1,AGO1-4,AGO2	1	0	0	0	0	0	0	6
MIMAT0000278	hsa-miR-221-3p	ENSG00000171608	PIK3CD	protein_coding	chr1	9787793	9787799	9787793	9787799	+	1	0	AGO2	1	0	0	0	0	0	0	3
MIMAT0000278	hsa-miR-221-3p	ENSG00000054523	KIF1B	protein_coding	chr1	10365534	10365539	10365534	10365539	+	1	0	AGO2	1	0	1	0	0	0	0	8
MIMAT0000278	hsa-miR-221-3p	ENSG00000116688	MFN2	protein_coding	chr1	12073293	12073299	12073278	12073300	+	3	0	AGO1-4,AGO2	1	0	1	0	1	0	0	7
MIMAT0000278	hsa-miR-221-3p	ENSG00000028137	TNFRSF1B	protein_coding	chr1	12268508	12268513	12268508	12268513	+	7	0	AGO1-4,AGO2	1	0	0	0	0	0	0	5
MIMAT0000278	hsa-miR-221-3p	ENSG00000116731	PRDM2	protein_coding	chr1	14113732	14113737	14113710	14113738	+	10	0	AGO1,AGO2	1	0	1	1	1	1	0	6
MIMAT0000278	hsa-miR-221-3p	ENSG00000116786	PLEKHM2	protein_coding	chr1	16061057	16061062	16061057	16061062	+	1	0	AGO1-4	1	0	0	0	0	0	0	4
MIMAT0000278	hsa-miR-221-3p	ENSG00000157191	NECAP2	protein_coding	chr1	16785818	16785823	16785818	16785823	+	1	0	AGO1-4	1	0	0	0	0	0	0	8
MIMAT0000278	hsa-miR-221-3p	ENSG00000142794	NBPF3	protein_coding	chr1	21810092	21810098	21810071	21810099	+	1	0	AGO1-4	1	0	1	1	1	0	0	11
MIMAT0000278	hsa-miR-221-3p	ENSG00000184677	ZBTB40	protein_coding	chr1	22853101	22853106	22853101	22853106	+	1	0	AGO2	1	0	0	0	0	0	0	13
MIMAT0000278	hsa-miR-221-3p	ENSG00000189266	PNRC2	protein_coding	chr1	24289157	24289162	24289141	24289163	+	14	0	AGO1,AGO1-4,AGO2	1	0	0	0	1	0	1	9
MIMAT0000278	hsa-miR-221-3p	ENSG00000169504	CLIC4	protein_coding	chr1	25167385	25167410	25167385	25167410	+	16	0	AGO1-4,AGO2	0	0	0	0	1	0	0	9
MIMAT0000278	hsa-miR-221-3p	ENSG00000204178	MACO1	protein_coding	chr1	25775306	25775328	25775306	25775328	+	1	0	AGO1-4	0	0	0	0	1	0	0	12
MIMAT0000278	hsa-miR-221-3p	ENSG00000157978	LDLRAP1	protein_coding	chr1	25895115	25895120	25895115	25895120	+	1	0	AGO2	1	0	0	0	0	0	0	3
MIMAT0000278	hsa-miR-221-3p	ENSG00000175087	PDIK1L	protein_coding	chr1	26451830	26451835	26451830	26451836	+	13	0	AGO1,AGO2,AGO3	1	0	0	0	0	0	1	8
MIMAT0000278	hsa-miR-221-3p	ENSG00000117682	DHDDS	protein_coding	chr1	26797007	26797012	26797007	26797012	+	1	0	AGO2	1	0	0	0	0	0	0	6
MIMAT0000278	hsa-miR-221-3p	ENSG00000117713	ARID1A	protein_coding	chr1	27108465	27108470	27108450	27108471	+	8	0	AGO1,AGO1-4,AGO2,AGO3	1	0	1	0	1	1	1	8
MIMAT0000278	hsa-miR-221-3p	ENSG00000117758	STX12	protein_coding	chr1	28150408	28150413	28150408	28150413	+	1	0	AGO2	1	0	0	0	0	0	0	7
MIMAT0000278	hsa-miR-221-3p	ENSG00000117751	PPP1R8	protein_coding	chr1	28177984	28177989	28177962	28177990	+	7	0	AGO1-4,AGO2	1	0	0	1	1	0	0	6
MIMAT0000278	hsa-miR-221-3p	ENSG00000130766	SESN2	protein_coding	chr1	28608605	28608610	28608588	28608611	+	33	0	AGO1,AGO1-4,AGO2,AGO3	1	0	0	0	1	0	0	7
MIMAT0000278	hsa-miR-221-3p	ENSG00000204138	PHACTR4	protein_coding	chr1	28823201	28823207	28823180	28823208	+	16	0	AGO1-4,AGO2	1	0	1	1	1	0	1	8
MIMAT0000278	hsa-miR-221-3p	ENSG00000025800	KPNA6	protein_coding	chr1	32637319	32637324	32637319	32637324	+	8	0	AGO1-4,AGO2	1	0	0	0	0	0	0	4
MIMAT0000278	hsa-miR-221-3p	ENSG00000084652	TXLNA	protein_coding	chr1	32661097	32661102	32661097	32661102	+	2	0	AGO1-4	1	0	0	0	0	0	0	1
MIMAT0000278	hsa-miR-221-3p	ENSG00000162522	KIAA1522	protein_coding	chr1	33239985	33239990	33239985	33239990	+	2	0	AGO1-4	1	0	0	0	0	0	0	8
MIMAT0000278	hsa-miR-221-3p	ENSG00000116497	S100PBP	protein_coding	chr1	33324423	33324428	33324423	33324429	+	2	0	AGO1-4,AGO2	1	0	0	0	0	0	1	7
MIMAT0000278	hsa-miR-221-3p	ENSG00000160094	ZNF362	protein_coding	chr1	33765963	33765968	33765963	33765968	+	3	0	AGO1-4,AGO2	1	0	0	0	0	0	0	11
MIMAT0000278	hsa-miR-221-3p	ENSG00000134698	AGO4	protein_coding	chr1	36322100	36322107	36322100	36322107	+	1	0	AGO1-4	0	0	0	0	0	0	1	7
MIMAT0000278	hsa-miR-221-3p	ENSG00000092847	AGO1	protein_coding	chr1	36385565	36385570	36385565	36385570	+	1	0	AGO2	1	0	1	0	0	0	0	10
MIMAT0000278	hsa-miR-221-3p	ENSG00000185090	MANEAL	protein_coding	chr1	38265953	38265958	38265953	38265958	+	2	0	AGO1	1	0	0	0	0	0	0	6
MIMAT0000278	hsa-miR-221-3p	ENSG00000131236	CAP1	protein_coding	chr1	40537824	40537829	40537824	40537829	+	4	0	AGO1-4,AGO2	1	0	0	0	0	0	0	2
MIMAT0000278	hsa-miR-221-3p	ENSG00000084073	ZMPSTE24	protein_coding	chr1	40759097	40759102	40759097	40759102	+	5	0	AGO1-4,AGO2	1	0	0	0	0	0	0	8
MIMAT0000278	hsa-miR-221-3p	ENSG00000066136	NFYC	protein_coding	chr1	41236979	41236984	41236979	41236984	+	1	0	AGO2	1	0	0	0	0	0	0	8
MIMAT0000278	hsa-miR-221-3p	ENSG00000132763	MMACHC	protein_coding	chr1	45973957	45973979	45973957	45973979	+	1	0	AGO1	0	0	0	0	1	0	0	7
MIMAT0000278	hsa-miR-221-3p	ENSG00000085999	RAD54L	protein_coding	chr1	46743972	46743977	46743972	46743977	+	2	0	AGO2	1	0	0	0	0	0	0	3
MIMAT0000278	hsa-miR-221-3p	ENSG00000117481	NSUN4	protein_coding	chr1	46828292	46828298	46828292	46828298	+	1	0	AGO1-4	1	0	0	0	0	0	0	10
MIMAT0000278	hsa-miR-221-3p	ENSG00000134717	BTF3L4	protein_coding	chr1	52553590	52553595	52553590	52553595	+	11	0	AGO1-4,AGO2	1	0	0	0	0	0	0	9
MIMAT0000278	hsa-miR-221-3p	ENSG00000134748	PRPF38A	protein_coding	chr1	52882853	52882858	52882853	52882858	+	1	0	AGO1-4	1	0	0	0	0	0	0	8
MIMAT0000278	hsa-miR-221-3p	ENSG00000157184	CPT2	protein_coding	chr1	53679630	53679635	53679630	53679635	+	5	0	AGO1-4,AGO2	1	0	0	0	0	0	0	11
MIMAT0000278	hsa-miR-221-3p	ENSG00000169174	PCSK9	protein_coding	chr1	55530466	55530471	55530450	55530472	+	2	1	AGO2	1	0	0	0	1	0	0	6
MIMAT0000278	hsa-miR-221-3p	ENSG00000162409	PRKAA2	protein_coding	chr1	57176831	57176837	57176831	57176837	+	2	0	AGO2,AGO3	1	0	1	0	0	0	0	16
MIMAT0000278	hsa-miR-221-3p	ENSG00000134709	HOOK1	protein_coding	chr1	60341846	60341852	60341831	60341853	+	7	0	AGO1-4,AGO2	1	0	0	0	1	0	0	12
MIMAT0000278	hsa-miR-221-3p	ENSG00000116675	DNAJC6	protein_coding	chr1	65881528	65881534	65881507	65881535	+	1	0	AGO1-4	1	0	1	1	1	0	0	10
MIMAT0000278	hsa-miR-221-3p	ENSG00000184588	PDE4B	protein_coding	chr1	66839952	66839958	66839936	66839959	+	9	0	AGO1-4,AGO2	1	0	1	0	1	0	0	9
MIMAT0000278	hsa-miR-221-3p	ENSG00000198160	MIER1	protein_coding	chr1	67451251	67451256	67451251	67451256	+	3	0	AGO1-4,AGO2	1	0	0	0	0	0	0	6
MIMAT0000278	hsa-miR-221-3p	ENSG00000116754	SRSF11	protein_coding	chr1	70703116	70703122	70703116	70703122	+	6	0	AGO1-4,AGO2	0	0	0	0	0	0	1	9
MIMAT0000278	hsa-miR-221-3p	ENSG00000254685	FPGT	protein_coding	chr1	74671630	74671635	74671614	74671636	+	3	0	AGO2	1	0	0	0	1	0	0	13
MIMAT0000278	hsa-miR-221-3p	ENSG00000117054	ACADM	protein_coding	chr1	76228726	76228732	76228705	76228733	+	1	0	AGO1-4	1	0	1	1	1	0	0	19
MIMAT0000278	hsa-miR-221-3p	ENSG00000162616	DNAJB4	protein_coding	chr1	78482472	78482477	78482456	78482478	+	5	0	AGO1-4,AGO2	1	0	0	0	1	0	0	8
MIMAT0000278	hsa-miR-221-3p	ENSG00000142875	PRKACB	protein_coding	chr1	84704098	84704103	84704098	84704103	+	4	0	AGO2	1	0	0	0	0	0	0	12
MIMAT0000278	hsa-miR-221-3p	ENSG00000142871	CYR61	protein_coding	chr1	86049264	86049270	86049243	86049271	+	25	4	AGO1,AGO1-4,AGO2,AGO3	1	0	1	1	1	0	1	8
MIMAT0000278	hsa-miR-221-3p	ENSG00000097033	SH3GLB1	protein_coding	chr1	87211054	87211059	87211054	87211059	+	1	0	AGO2	1	0	0	0	0	0	0	4
MIMAT0000278	hsa-miR-221-3p	ENSG00000143013	LMO4	protein_coding	chr1	87810569	87810574	87810569	87810574	+	8	0	AGO1,AGO1-4,AGO2	1	0	1	0	0	0	0	2
MIMAT0000278	hsa-miR-221-3p	ENSG00000162664	ZNF326	protein_coding	chr1	90493758	90493763	90493742	90493764	+	3	0	AGO1-4	1	0	0	0	1	1	0	7
MIMAT0000278	hsa-miR-221-3p	ENSG00000122483	CCDC18	protein_coding	chr1	93744099	93744105	93744078	93744106	+	2	0	AGO2	1	0	1	1	1	0	0	5
MIMAT0000278	hsa-miR-221-3p	ENSG00000137942	FNBP1L	protein_coding	chr1	94018674	94018679	94018674	94018679	+	3	0	AGO1-4,AGO2	1	0	0	0	0	0	0	16
MIMAT0000278	hsa-miR-221-3p	ENSG00000162688	AGL	protein_coding	chr1	100389021	100389028	100389007	100389029	+	1	0	AGO2	1	0	0	0	1	0	0	12
MIMAT0000278	hsa-miR-221-3p	ENSG00000162695	SLC30A7	protein_coding	chr1	101441120	101441125	101441120	101441125	+	1	0	AGO1-4	1	0	0	0	0	0	0	8
MIMAT0000278	hsa-miR-221-3p	ENSG00000198890	PRMT6	protein_coding	chr1	107601619	107601624	107601619	107601624	+	2	0	AGO1-4	1	0	0	0	0	0	0	11
MIMAT0000278	hsa-miR-221-3p	ENSG00000215717	TMEM167B	protein_coding	chr1	109639002	109639024	109639002	109639024	+	5	0	AGO2	0	0	0	0	1	0	0	7
MIMAT0000278	hsa-miR-221-3p	ENSG00000065135	GNAI3	protein_coding	chr1	110135252	110135258	110135231	110135259	+	8	0	AGO1,AGO1-4,AGO2	1	0	1	1	1	0	1	6
MIMAT0000278	hsa-miR-221-3p	ENSG00000064703	DDX20	protein_coding	chr1	112309944	112309967	112309944	112309967	+	1	0	AGO1-4	0	0	0	0	1	0	0	9
MIMAT0000278	hsa-miR-221-3p	ENSG00000163349	HIPK1	protein_coding	chr1	114519513	114519520	114519513	114519520	+	4	2	AGO1-4,AGO2	1	0	0	0	0	0	0	9
MIMAT0000278	hsa-miR-221-3p	ENSG00000173218	VANGL1	protein_coding	chr1	116237182	116237187	116237182	116237187	+	2	0	AGO1-4	1	0	1	0	0	0	0	6
MIMAT0000278	hsa-miR-221-3p	ENSG00000163399	ATP1A1	protein_coding	chr1	116947220	116947225	116947202	116947226	+	13	2	AGO1-4,AGO2	1	0	0	0	1	1	0	5
MIMAT0000278	hsa-miR-221-3p	ENSG00000116830	TTF2	protein_coding	chr1	117645287	117645292	117645271	117645293	+	4	0	AGO1-4,AGO2	1	0	1	0	1	0	0	5
MIMAT0000278	hsa-miR-221-3p	ENSG00000271601	LIX1L	protein_coding	chr1	145499056	145499061	145499037	145499062	+	9	0	AGO1,AGO2	1	0	0	0	1	0	0	11
MIMAT0000278	hsa-miR-221-3p	ENSG00000131779	PEX11B	protein_coding	chr1	145523615	145523620	145523594	145523621	+	9	0	AGO1-4,AGO2	1	0	0	0	1	0	0	11
MIMAT0000278	hsa-miR-221-3p	ENSG00000116128	BCL9	protein_coding	chr1	147097036	147097041	147097036	147097041	+	2	0	AGO1-4	1	0	0	0	0	0	0	15
MIMAT0000278	hsa-miR-221-3p	ENSG00000163125	RPRD2	protein_coding	chr1	150446284	150446289	150446284	150446289	+	2	0	AGO2	0	0	1	0	0	0	0	17
MIMAT0000278	hsa-miR-221-3p	ENSG00000143363	PRUNE1	protein_coding	chr1	151007803	151007808	151007781	151007830	+	15	0	AGO1,AGO1-4,AGO2,AGO3	1	0	1	2	0	0	0	21
MIMAT0000278	hsa-miR-221-3p	ENSG00000169242	EFNA1	protein_coding	chr1	155107069	155107074	155107069	155107074	+	16	0	AGO1-4,AGO2	1	0	1	0	0	0	0	9
MIMAT0000278	hsa-miR-221-3p	ENSG00000143630	HCN3	protein_coding	chr1	155258729	155258734	155258729	155258734	+	1	0	AGO2	1	0	0	0	0	0	0	12
MIMAT0000278	hsa-miR-221-3p	ENSG00000160785	SLC25A44	protein_coding	chr1	156180985	156180991	156180964	156180992	+	8	0	AGO1-4,AGO2	1	0	1	1	1	0	0	14
MIMAT0000278	hsa-miR-221-3p	ENSG00000026751	SLAMF7	protein_coding	chr1	160723574	160723579	160723574	160723579	+	2	0	AGO1-4,AGO2	1	0	0	0	0	0	0	4
MIMAT0000278	hsa-miR-221-3p	ENSG00000122224	LY9	protein_coding	chr1	160772377	160772382	160772377	160772382	+	2	0	AGO2	1	0	0	0	0	0	0	4
MIMAT0000278	hsa-miR-221-3p	ENSG00000143258	USP21	protein_coding	chr1	161135357	161135362	161135357	161135362	+	2	0	AGO1-4	1	0	0	0	0	0	0	20
MIMAT0000278	hsa-miR-221-3p	ENSG00000118217	ATF6	protein_coding	chr1	161928673	161928680	161928659	161928681	+	2	0	AGO1-4	1	0	0	0	1	0	0	14
MIMAT0000278	hsa-miR-221-3p	ENSG00000239887	C1orf226	protein_coding	chr1	162356108	162356113	162356108	162356113	+	1	0	AGO2	1	0	0	0	0	0	0	12
MIMAT0000278	hsa-miR-221-3p	ENSG00000152332	UHMK1	protein_coding	chr1	162492611	162492617	162492590	162492618	+	11	0	AGO1,AGO1-4,AGO2	1	0	1	1	1	0	0	6
MIMAT0000278	hsa-miR-221-3p	ENSG00000117152	RGS4	protein_coding	chr1	163044452	163044457	163044452	163044457	+	12	0	AGO1-4	1	0	0	0	0	0	0	6
MIMAT0000278	hsa-miR-221-3p	ENSG00000185630	PBX1	protein_coding	chr1	164816927	164816951	164816927	164816951	+	4	0	AGO1-4,AGO2	0	0	0	0	1	0	0	17
MIMAT0000278	hsa-miR-221-3p	ENSG00000143190	POU2F1	protein_coding	chr1	167385969	167385974	167385969	167385974	+	4	0	AGO1-4,AGO2	0	0	1	0	0	0	0	12
MIMAT0000278	hsa-miR-221-3p	ENSG00000197965	MPZL1	protein_coding	chr1	167757222	167757226	167757199	167757244	+	6	0	AGO1-4,AGO2	1	2	1	2	1	0	0	11
MIMAT0000278	hsa-miR-221-3p	ENSG00000143155	TIPRL	protein_coding	chr1	168169394	168169399	168169394	168169399	+	2	1	AGO1-4	1	0	0	0	0	0	0	11
MIMAT0000278	hsa-miR-221-3p	ENSG00000143153	ATP1B1	protein_coding	chr1	169100959	169100964	169100943	169100965	+	9	0	AGO1-4,AGO2	1	0	0	0	1	1	1	9
MIMAT0000278	hsa-miR-221-3p	ENSG00000116132	PRRX1	protein_coding	chr1	170707028	170707033	170707028	170707033	+	4	0	AGO1-4,AGO2	1	0	0	0	0	0	0	7
MIMAT0000278	hsa-miR-221-3p	ENSG00000117592	PRDX6	protein_coding	chr1	173457729	173457734	173457729	173457734	+	7	0	AGO1-4,AGO2	1	0	0	0	0	0	0	5
MIMAT0000278	hsa-miR-221-3p	ENSG00000185278	ZBTB37	protein_coding	chr1	173871212	173871219	173871212	173871219	+	4	0	AGO1-4,AGO2	0	0	0	0	0	0	1	19
MIMAT0000278	hsa-miR-221-3p	ENSG00000135837	CEP350	protein_coding	chr1	180082166	180082171	180082166	180082171	+	2	0	AGO1-4,AGO2	1	0	0	0	0	0	0	13
MIMAT0000278	hsa-miR-221-3p	ENSG00000116698	SMG7	protein_coding	chr1	183521600	183521605	183521600	183521605	+	1	0	AGO2	1	0	0	0	0	0	0	9
MIMAT0000278	hsa-miR-221-3p	ENSG00000143344	RGL1	protein_coding	chr1	183897263	183897269	183897248	183897270	+	1	0	AGO2	1	0	0	0	1	0	0	11
MIMAT0000278	hsa-miR-221-3p	ENSG00000198860	TSEN15	protein_coding	chr1	184023521	184023541	184023521	184023541	+	3	0	AGO1-4,AGO2	0	0	0	0	1	0	0	10
MIMAT0000278	hsa-miR-221-3p	ENSG00000121481	RNF2	protein_coding	chr1	185070358	185070363	185070358	185070363	+	3	0	AGO1-4,AGO2	1	0	0	0	0	0	0	12
MIMAT0000278	hsa-miR-221-3p	ENSG00000118200	CAMSAP2	protein_coding	chr1	200828768	200828773	200828768	200828773	+	3	0	AGO1-4,AGO2	1	0	0	0	0	0	0	6
MIMAT0000278	hsa-miR-221-3p	ENSG00000081277	PKP1	protein_coding	chr1	201301622	201301628	201301622	201301628	+	1	0	AGO2	1	0	0	0	0	0	0	2
MIMAT0000278	hsa-miR-221-3p	ENSG00000198700	IPO9	protein_coding	chr1	201846029	201846034	201846029	201846034	+	1	0	AGO1-4	1	0	0	0	0	0	0	15
MIMAT0000278	hsa-miR-221-3p	ENSG00000077157	PPP1R12B	protein_coding	chr1	202551655	202551661	202551655	202551661	+	1	0	AGO2	1	0	0	0	0	0	0	10
MIMAT0000278	hsa-miR-221-3p	ENSG00000058668	ATP2B4	protein_coding	chr1	203709182	203709187	203709182	203709187	+	3	0	AGO1-4,AGO2	1	0	0	0	0	0	0	6
MIMAT0000278	hsa-miR-221-3p	ENSG00000058673	ZC3H11A	protein_coding	chr1	203822484	203822489	203822484	203822489	+	1	0	AGO1-4	1	0	0	0	0	0	0	12
MIMAT0000278	hsa-miR-221-3p	ENSG00000257315	ZBED6	protein_coding	chr1	203822484	203822489	203822484	203822489	+	1	0	AGO1-4	1	0	0	0	0	0	0	9
MIMAT0000278	hsa-miR-221-3p	ENSG00000198625	MDM4	protein_coding	chr1	204511981	204511987	204511965	204511988	+	5	0	AGO1-4,AGO2	0	0	1	0	1	0	1	15
MIMAT0000278	hsa-miR-221-3p	ENSG00000163486	SRGAP2	protein_coding	chr1	206635295	206635300	206635295	206635300	+	1	0	AGO2	1	0	0	0	0	0	0	0
MIMAT0000278	hsa-miR-221-3p	ENSG00000266094	RASSF5	protein_coding	chr1	206760749	206760754	206760749	206760755	+	3	0	AGO2,AGO3	1	0	0	0	0	1	0	4
MIMAT0000278	hsa-miR-221-3p	ENSG00000123836	PFKFB2	protein_coding	chr1	207253681	207253687	207253665	207253688	+	2	0	AGO2	1	0	1	0	1	0	0	8
MIMAT0000278	hsa-miR-221-3p	ENSG00000162772	ATF3	protein_coding	chr1	212793880	212793886	212793865	212793887	+	2	0	AGO1,AGO2	1	0	0	0	1	0	0	5
MIMAT0000278	hsa-miR-221-3p	ENSG00000116141	MARK1	protein_coding	chr1	220835695	220835700	220835673	220835701	+	2	0	AGO2	1	0	1	1	1	0	0	12
MIMAT0000278	hsa-miR-221-3p	ENSG00000162817	C1orf115	protein_coding	chr1	220871283	220871288	220871283	220871288	+	1	0	AGO2	1	0	0	0	0	0	0	12
MIMAT0000278	hsa-miR-221-3p	ENSG00000154305	MIA3	protein_coding	chr1	222839219	222839224	222839197	222839225	+	27	0	AGO1-4,AGO2	1	0	1	1	1	1	1	18
MIMAT0000278	hsa-miR-221-3p	ENSG00000143756	FBXO28	protein_coding	chr1	224346821	224346827	224346800	224346828	+	9	0	AGO1,AGO2,AGO3	1	0	1	1	1	0	0	11
MIMAT0000278	hsa-miR-221-3p	ENSG00000143786	CNIH3	protein_coding	chr1	224928207	224928212	224928207	224928212	+	2	0	AGO1-4	1	0	0	0	0	0	0	10
MIMAT0000278	hsa-miR-221-3p	ENSG00000163041	H3F3A	protein_coding	chr1	226259560	226259565	226259544	226259566	+	1	0	AGO1-4	1	0	0	0	1	1	1	17
MIMAT0000278	hsa-miR-221-3p	ENSG00000143761	ARF1	protein_coding	chr1	228286637	228286643	228286622	228286644	+	16	5	AGO1,AGO1-4,AGO2	1	0	0	0	1	0	0	11
MIMAT0000278	hsa-miR-221-3p	ENSG00000181873	IBA57	protein_coding	chr1	228365636	228365641	228365636	228365641	+	1	0	AGO1-4	1	0	0	0	0	0	0	9
MIMAT0000278	hsa-miR-221-3p	ENSG00000116574	RHOU	protein_coding	chr1	228880845	228880850	228880845	228880850	+	5	0	AGO1,AGO1-4,AGO2	1	0	0	0	0	0	0	16
MIMAT0000278	hsa-miR-221-3p	ENSG00000168118	RAB4A	protein_coding	chr1	229439822	229439827	229439822	229439827	+	5	0	AGO1-4,AGO2	1	0	0	0	0	0	0	15
MIMAT0000278	hsa-miR-221-3p	ENSG00000135775	COG2	protein_coding	chr1	230829238	230829243	230829238	230829243	+	1	0	AGO2	1	0	0	0	0	0	0	20
MIMAT0000278	hsa-miR-221-3p	ENSG00000077585	GPR137B	protein_coding	chr1	236372164	236372170	236372143	236372171	+	3	0	AGO1-4,AGO2	1	0	1	1	1	0	0	11
MIMAT0000278	hsa-miR-221-3p	ENSG00000116984	MTR	protein_coding	chr1	237061434	237061439	237061434	237061439	+	2	0	AGO1-4,AGO2	1	0	1	0	0	0	0	12
MIMAT0000278	hsa-miR-221-3p	ENSG00000057608	GDI2	protein_coding	chr10	5807654	5807661	5807654	5807661	-	5	0	AGO1,AGO1-4,AGO2	1	0	0	0	0	0	0	7
MIMAT0000278	hsa-miR-221-3p	ENSG00000065675	PRKCQ	protein_coding	chr10	6470013	6470018	6470013	6470018	-	2	0	AGO2	1	0	0	0	0	0	0	6
MIMAT0000278	hsa-miR-221-3p	ENSG00000148429	USP6NL	protein_coding	chr10	11502791	11502797	11502790	11502818	-	9	0	AGO1-4,AGO2	1	0	1	1	1	0	1	7
MIMAT0000278	hsa-miR-221-3p	ENSG00000107897	ACBD5	protein_coding	chr10	27484844	27484849	27484844	27484849	-	1	0	AGO2	1	0	0	0	0	0	0	15
MIMAT0000278	hsa-miR-221-3p	ENSG00000165757	JCAD	protein_coding	chr10	30305752	30305757	30305752	30305759	-	1	0	AGO2	1	0	1	0	0	0	0	10
MIMAT0000278	hsa-miR-221-3p	ENSG00000165322	ARHGAP12	protein_coding	chr10	32095880	32095885	32095880	32095885	-	5	0	AGO1-4,AGO2	1	0	0	0	0	0	0	8
MIMAT0000278	hsa-miR-221-3p	ENSG00000099250	NRP1	protein_coding	chr10	33468469	33468474	33468469	33468474	-	16	0	AGO1-4,AGO2	1	0	0	0	0	0	0	9
MIMAT0000278	hsa-miR-221-3p	ENSG00000175395	ZNF25	protein_coding	chr10	38239120	38239125	38239120	38239125	-	4	0	AGO1-4,AGO2	1	0	0	0	0	0	0	15
MIMAT0000278	hsa-miR-221-3p	ENSG00000107562	CXCL12	protein_coding	chr10	44868614	44868620	44868613	44868641	-	4	0	AGO1-4,AGO2	1	0	1	1	1	0	1	10
MIMAT0000278	hsa-miR-221-3p	ENSG00000165406	44263	protein_coding	chr10	45951059	45951064	45951059	45951064	-	1	0	AGO1-4	0	0	1	0	0	0	0	11
MIMAT0000278	hsa-miR-221-3p	ENSG00000225830	ERCC6	protein_coding	chr10	50723320	50723327	50723320	50723327	-	2	0	AGO1-4	1	0	0	0	0	0	0	6
MIMAT0000278	hsa-miR-221-3p	ENSG00000177613	CSTF2T	protein_coding	chr10	53457411	53457416	53457411	53457416	-	10	0	AGO1,AGO2,AGO3	1	0	0	0	0	0	0	11
MIMAT0000278	hsa-miR-221-3p	ENSG00000079332	SAR1A	protein_coding	chr10	71911206	71911211	71911206	71911211	-	11	0	AGO1,AGO1-4,AGO2,AGO3	1	0	1	0	0	0	0	9
MIMAT0000278	hsa-miR-221-3p	ENSG00000197746	PSAP	protein_coding	chr10	73577051	73577056	73577051	73577056	-	24	0	AGO1-4,AGO2	1	0	0	0	0	0	0	9
MIMAT0000278	hsa-miR-221-3p	ENSG00000148719	DNAJB12	protein_coding	chr10	74093748	74093753	74093748	74093753	-	2	0	AGO1-4,AGO2	1	0	0	0	0	0	0	7
MIMAT0000278	hsa-miR-221-3p	ENSG00000107758	PPP3CB	protein_coding	chr10	75203848	75203854	75203847	75203866	-	1	0	AGO1-4	0	0	0	0	1	0	1	12
MIMAT0000278	hsa-miR-221-3p	ENSG00000166348	USP54	protein_coding	chr10	75257603	75257626	75257603	75257626	-	1	0	AGO1	0	0	0	0	1	0	0	13
MIMAT0000278	hsa-miR-221-3p	ENSG00000185009	AP3M1	protein_coding	chr10	75883033	75883038	75883032	75883054	-	14	0	AGO1,AGO1-4,AGO2	1	1	0	0	0	1	1	14
MIMAT0000278	hsa-miR-221-3p	ENSG00000165424	ZCCHC24	protein_coding	chr10	81142450	81142455	81142450	81142455	-	12	0	AGO1-4,AGO2	1	0	0	0	0	0	0	11
MIMAT0000278	hsa-miR-221-3p	ENSG00000107864	CPEB3	protein_coding	chr10	93808835	93808841	93808834	93808862	-	3	0	AGO2	1	0	1	1	1	0	1	11
MIMAT0000278	hsa-miR-221-3p	ENSG00000213390	ARHGAP19	protein_coding	chr10	98984530	98984536	98984530	98984536	-	2	0	AGO2	1	0	0	0	0	0	0	8
MIMAT0000278	hsa-miR-221-3p	ENSG00000181274	FRAT2	protein_coding	chr10	99092359	99092365	99092358	99092386	-	1	0	AGO1-4	1	0	0	1	1	0	1	11
MIMAT0000278	hsa-miR-221-3p	ENSG00000052749	RRP12	protein_coding	chr10	99116532	99116537	99116532	99116537	-	3	0	AGO1-4,AGO2	1	0	0	0	0	0	0	7
MIMAT0000278	hsa-miR-221-3p	ENSG00000171160	MORN4	protein_coding	chr10	99375710	99375715	99375710	99375717	-	1	0	AGO2	1	0	1	0	0	0	0	17
MIMAT0000278	hsa-miR-221-3p	ENSG00000014919	COX15	protein_coding	chr10	101473796	101473802	101473795	101473818	-	7	0	AGO2	1	0	1	0	1	0	0	15
MIMAT0000278	hsa-miR-221-3p	ENSG00000095485	CWF19L1	protein_coding	chr10	101992841	101992846	101992841	101992846	-	1	0	AGO1-4	1	0	0	0	0	0	0	11
MIMAT0000278	hsa-miR-221-3p	ENSG00000138107	ACTR1A	protein_coding	chr10	104239462	104239467	104239462	104239467	-	2	0	AGO1-4,AGO2	1	0	0	0	0	0	0	5
MIMAT0000278	hsa-miR-221-3p	ENSG00000119927	GPAM	protein_coding	chr10	113912958	113912965	113912957	113912977	-	6	0	AGO1-4,AGO2	1	0	0	0	1	0	0	16
MIMAT0000278	hsa-miR-221-3p	ENSG00000198924	DCLRE1A	protein_coding	chr10	115594864	115594886	115594864	115594886	-	1	0	AGO2	0	0	0	0	1	0	0	17
MIMAT0000278	hsa-miR-221-3p	ENSG00000187164	SHTN1	protein_coding	chr10	118644705	118644710	118644704	118644726	-	7	0	AGO1-4,AGO2	1	0	0	0	1	1	1	16
MIMAT0000278	hsa-miR-221-3p	ENSG00000107560	RAB11FIP2	protein_coding	chr10	119765201	119765206	119765201	119765206	-	7	0	AGO1-4,AGO2	1	0	0	0	0	0	0	11
MIMAT0000278	hsa-miR-221-3p	ENSG00000197771	MCMBP	protein_coding	chr10	121590947	121590952	121590947	121590952	-	2	0	AGO1-4,AGO2	1	0	0	0	0	0	0	8
MIMAT0000278	hsa-miR-221-3p	ENSG00000107672	NSMCE4A	protein_coding	chr10	123716672	123716692	123716672	123716692	-	1	0	AGO2	0	0	0	0	1	0	0	11
MIMAT0000278	hsa-miR-221-3p	ENSG00000095574	IKZF5	protein_coding	chr10	124750785	124750791	124750784	124750806	-	3	0	AGO1-4,AGO2	0	0	1	0	1	0	0	14
MIMAT0000278	hsa-miR-221-3p	ENSG00000189319	FAM53B	protein_coding	chr10	126308195	126308200	126308195	126308200	-	1	0	AGO2	1	0	1	0	0	0	0	6
MIMAT0000278	hsa-miR-221-3p	ENSG00000203791	EEF1AKMT2	protein_coding	chr10	126449003	126449010	126449003	126449010	-	1	0	AGO1-4	1	0	0	0	0	0	0	9
MIMAT0000278	hsa-miR-221-3p	ENSG00000258539	AC068896.1	protein_coding	chr10	126449003	126449010	126449003	126449010	-	1	0	AGO1-4	1	0	0	0	0	0	0	7
MIMAT0000278	hsa-miR-221-3p	ENSG00000148848	ADAM12	protein_coding	chr10	127701235	127701240	127701235	127701240	-	1	0	AGO1-4	0	0	1	0	0	0	0	4
MIMAT0000278	hsa-miR-221-3p	ENSG00000148773	MKI67	protein_coding	chr10	129895087	129895092	129895087	129895092	-	2	0	AGO1-4,AGO2	1	0	0	0	0	0	0	3
MIMAT0000278	hsa-miR-221-3p	ENSG00000108001	EBF3	protein_coding	chr10	131635269	131635274	131635268	131635290	-	8	0	AGO1,AGO1-4,AGO2	1	0	0	0	1	0	0	7
MIMAT0000278	hsa-miR-221-3p	ENSG00000047056	WDR37	protein_coding	chr10	1175534	1175540	1175534	1175541	+	5	0	AGO1-4,AGO2	1	0	0	0	0	0	1	7
MIMAT0000278	hsa-miR-221-3p	ENSG00000173848	NET1	protein_coding	chr10	5499785	5499792	5499771	5499793	+	8	0	AGO1-4,AGO2	1	0	0	0	1	0	0	9
MIMAT0000278	hsa-miR-221-3p	ENSG00000165632	TAF3	protein_coding	chr10	8057853	8057858	8057838	8057859	+	8	0	AGO1,AGO2	0	1	1	0	0	0	0	10
MIMAT0000278	hsa-miR-221-3p	ENSG00000181192	DHTKD1	protein_coding	chr10	12164787	12164793	12164787	12164793	+	3	0	AGO1-4,AGO2	1	0	0	0	0	0	0	17
MIMAT0000278	hsa-miR-221-3p	ENSG00000183049	CAMK1D	protein_coding	chr10	12877428	12877435	12877407	12877435	+	2	0	AGO2	0	0	0	1	1	0	1	9
MIMAT0000278	hsa-miR-221-3p	ENSG00000065328	MCM10	protein_coding	chr10	13252491	13252496	13252491	13252496	+	1	0	AGO2	1	0	0	0	0	0	0	10
MIMAT0000278	hsa-miR-221-3p	ENSG00000136738	STAM	protein_coding	chr10	17757435	17757440	17757435	17757440	+	1	0	AGO1-4	1	0	0	0	0	0	0	7
MIMAT0000278	hsa-miR-221-3p	ENSG00000120594	PLXDC2	protein_coding	chr10	20568861	20568866	20568861	20568866	+	4	0	AGO1-4,AGO2	1	0	0	0	0	0	0	10
MIMAT0000278	hsa-miR-221-3p	ENSG00000078403	MLLT10	protein_coding	chr10	22002705	22002726	22002705	22002726	+	7	0	AGO1,AGO1-4,AGO2	0	0	0	0	1	0	0	10
MIMAT0000278	hsa-miR-221-3p	ENSG00000168283	BMI1	protein_coding	chr10	22618940	22618946	22618919	22618947	+	21	0	AGO1,AGO1-4,AGO2	1	0	1	1	1	0	1	10
MIMAT0000278	hsa-miR-221-3p	ENSG00000099246	RAB18	protein_coding	chr10	27827187	27827193	27827166	27827194	+	14	0	AGO1,AGO1-4,AGO2	1	0	1	1	1	0	0	12
MIMAT0000278	hsa-miR-221-3p	ENSG00000107968	MAP3K8	protein_coding	chr10	30750270	30750275	30750254	30750276	+	2	4	AGO1-4,AGO2	1	0	0	0	1	0	0	4
MIMAT0000278	hsa-miR-221-3p	ENSG00000165512	ZNF22	protein_coding	chr10	45500525	45500530	45500525	45500530	+	3	0	AGO1-4,AGO2	1	0	0	0	0	0	0	13
MIMAT0000278	hsa-miR-221-3p	ENSG00000107643	MAPK8	protein_coding	chr10	49643571	49643576	49643571	49643576	+	3	0	AGO1-4	0	0	1	0	0	0	0	17
MIMAT0000278	hsa-miR-221-3p	ENSG00000072401	UBE2D1	protein_coding	chr10	60129318	60129323	60129302	60129324	+	8	0	AGO1,AGO1-4,AGO2	1	0	0	0	1	0	0	6
MIMAT0000278	hsa-miR-221-3p	ENSG00000108064	TFAM	protein_coding	chr10	60150561	60150584	60150561	60150584	+	1	0	AGO1	0	0	0	0	1	0	0	9
MIMAT0000278	hsa-miR-221-3p	ENSG00000170312	CDK1	protein_coding	chr10	62553713	62553735	62553713	62553735	+	9	0	AGO1-4,AGO2	0	0	0	0	1	0	0	6
MIMAT0000278	hsa-miR-221-3p	ENSG00000181915	ADO	protein_coding	chr10	64567639	64567644	64567639	64567644	+	2	0	AGO2	1	0	1	0	0	0	0	13
MIMAT0000278	hsa-miR-221-3p	ENSG00000096717	SIRT1	protein_coding	chr10	69677054	69677060	69677040	69677061	+	1	0	AGO1-4	1	0	0	0	1	0	0	10
MIMAT0000278	hsa-miR-221-3p	ENSG00000096746	HNRNPH3	protein_coding	chr10	70102781	70102787	70102760	70102788	+	15	0	AGO1-4,AGO2	1	0	1	1	1	0	1	8
MIMAT0000278	hsa-miR-221-3p	ENSG00000165732	DDX21	protein_coding	chr10	70743793	70743799	70743793	70743799	+	3	0	AGO1,AGO1-4	1	0	0	0	0	0	0	5
MIMAT0000278	hsa-miR-221-3p	ENSG00000099282	TSPAN15	protein_coding	chr10	71267090	71267095	71267090	71267095	+	3	0	AGO2	1	0	0	0	0	0	0	10
MIMAT0000278	hsa-miR-221-3p	ENSG00000166224	SGPL1	protein_coding	chr10	72639480	72639485	72639480	72639485	+	16	0	AGO1,AGO1-4,AGO2,AGO3	1	0	0	0	0	0	0	13
MIMAT0000278	hsa-miR-221-3p	ENSG00000122863	CHST3	protein_coding	chr10	73773061	73773066	73773041	73773067	+	3	2	AGO1-4,AGO2	1	1	0	0	0	0	0	6
MIMAT0000278	hsa-miR-221-3p	ENSG00000166295	ANAPC16	protein_coding	chr10	73993555	73993560	73993555	73993561	+	9	0	AGO1,AGO1-4,AGO2,AGO3	1	0	0	0	0	0	1	16
MIMAT0000278	hsa-miR-221-3p	ENSG00000168209	DDIT4	protein_coding	chr10	74035158	74035163	74035158	74035164	+	43	0	AGO1,AGO1-4,AGO2,AGO3	1	0	1	0	0	1	0	4
MIMAT0000278	hsa-miR-221-3p	ENSG00000156026	MCU	protein_coding	chr10	74646469	74646474	74646469	74646474	+	2	0	AGO1-4,AGO2	1	0	0	0	0	0	0	9
MIMAT0000278	hsa-miR-221-3p	ENSG00000176986	SEC24C	protein_coding	chr10	75531099	75531105	75531081	75531106	+	12	1	AGO1-4,AGO2	1	0	1	0	1	0	0	11
MIMAT0000278	hsa-miR-221-3p	ENSG00000035403	VCL	protein_coding	chr10	75878928	75878933	75878928	75878933	+	2	0	AGO1-4,AGO2	1	0	0	0	0	0	0	4
MIMAT0000278	hsa-miR-221-3p	ENSG00000156650	KAT6B	protein_coding	chr10	76791859	76791864	76791843	76791865	+	7	0	AGO1-4,AGO2	1	0	0	0	1	0	0	13
MIMAT0000278	hsa-miR-221-3p	ENSG00000156671	SAMD8	protein_coding	chr10	76910312	76910340	76910312	76910340	+	2	0	AGO1-4	0	0	0	1	0	0	0	8
MIMAT0000278	hsa-miR-221-3p	ENSG00000108175	ZMIZ1	protein_coding	chr10	81075372	81075377	81075372	81075377	+	3	0	AGO1-4,AGO2	1	0	0	0	0	0	0	14
MIMAT0000278	hsa-miR-221-3p	ENSG00000107771	CCSER2	protein_coding	chr10	86277553	86277558	86277553	86277558	+	2	0	AGO1-4	1	0	0	0	0	0	0	11
MIMAT0000278	hsa-miR-221-3p	ENSG00000122376	FAM35A	protein_coding	chr10	88950684	88950690	88950663	88950691	+	3	0	AGO1-4,AGO2	1	0	1	1	1	0	0	14
MIMAT0000278	hsa-miR-221-3p	ENSG00000171862	PTEN	protein_coding	chr10	89727909	89727914	89727887	89727915	+	4	0	AGO1-4	1	0	1	1	0	0	0	5
MIMAT0000278	hsa-miR-221-3p	ENSG00000119922	IFIT2	protein_coding	chr10	91067863	91067870	91067843	91067871	+	5	0	AGO1-4,AGO2	1	0	0	1	1	0	0	4
MIMAT0000278	hsa-miR-221-3p	ENSG00000152778	IFIT5	protein_coding	chr10	91178819	91178824	91178819	91178824	+	1	0	AGO2	1	0	0	0	0	0	0	3
MIMAT0000278	hsa-miR-221-3p	ENSG00000165338	HECTD2	protein_coding	chr10	93272172	93272177	93272150	93272178	+	8	0	AGO2	1	0	1	1	1	1	1	11
MIMAT0000278	hsa-miR-221-3p	ENSG00000107854	TNKS2	protein_coding	chr10	93624611	93624617	93624597	93624618	+	9	0	AGO1,AGO1-4,AGO2	1	0	0	0	1	0	0	8
MIMAT0000278	hsa-miR-221-3p	ENSG00000198060	44260	protein_coding	chr10	94112388	94112395	94112388	94112395	+	4	0	AGO1-4,AGO2	1	0	0	0	0	0	0	10
MIMAT0000278	hsa-miR-221-3p	ENSG00000138180	CEP55	protein_coding	chr10	95288638	95288644	95288621	95288645	+	5	0	AGO2	1	0	0	0	1	0	0	4
MIMAT0000278	hsa-miR-221-3p	ENSG00000119969	HELLS	protein_coding	chr10	96370952	96370957	96370930	96370958	+	1	0	AGO1-4	0	0	1	1	0	0	0	7
MIMAT0000278	hsa-miR-221-3p	ENSG00000177853	ZNF518A	protein_coding	chr10	97920913	97920920	97920913	97920920	+	3	0	AGO1-4,AGO2	1	0	0	0	0	0	0	15
MIMAT0000278	hsa-miR-221-3p	ENSG00000196233	LCOR	protein_coding	chr10	98720761	98720766	98720761	98720766	+	4	0	AGO1,AGO2	0	0	1	0	0	0	0	12
MIMAT0000278	hsa-miR-221-3p	ENSG00000171314	PGAM1	protein_coding	chr10	99192392	99192397	99192392	99192397	+	18	0	AGO1,AGO1-4,AGO2	1	0	0	0	0	0	0	4
MIMAT0000278	hsa-miR-221-3p	ENSG00000155252	PI4K2A	protein_coding	chr10	99433880	99433885	99433880	99433885	+	1	0	AGO1-4	1	0	0	0	0	0	0	3
MIMAT0000278	hsa-miR-221-3p	ENSG00000198018	ENTPD7	protein_coding	chr10	101464813	101464818	101464813	101464818	+	3	0	AGO1-4,AGO2	1	0	1	0	0	0	0	10
MIMAT0000278	hsa-miR-221-3p	ENSG00000099194	SCD	protein_coding	chr10	102121030	102121035	102121030	102121035	+	12	0	AGO1-4,AGO2	1	0	1	0	0	0	0	8
MIMAT0000278	hsa-miR-221-3p	ENSG00000166135	HIF1AN	protein_coding	chr10	102309723	102309730	102309723	102309730	+	7	0	AGO1,AGO1-4,AGO2	1	0	0	0	0	0	0	9
MIMAT0000278	hsa-miR-221-3p	ENSG00000095539	SEMA4G	protein_coding	chr10	102745154	102745159	102745154	102745159	+	1	0	AGO2	1	0	0	0	0	0	0	12
MIMAT0000278	hsa-miR-221-3p	ENSG00000107815	TWNK	protein_coding	chr10	102753422	102753428	102753405	102753429	+	1	1	AGO1	1	0	1	0	1	0	0	10
MIMAT0000278	hsa-miR-221-3p	ENSG00000166272	WBP1L	protein_coding	chr10	104574190	104574195	104574190	104574195	+	1	0	AGO1-4	1	0	0	0	0	0	0	13
MIMAT0000278	hsa-miR-221-3p	ENSG00000148842	CNNM2	protein_coding	chr10	104837527	104837532	104837527	104837532	+	2	0	AGO1-4,AGO2	1	0	0	0	0	0	0	14
MIMAT0000278	hsa-miR-221-3p	ENSG00000065613	SLK	protein_coding	chr10	105786948	105786953	105786948	105786953	+	12	0	AGO1-4,AGO2	1	0	0	0	0	0	0	6
MIMAT0000278	hsa-miR-221-3p	ENSG00000148700	ADD3	protein_coding	chr10	111893462	111893486	111893462	111893486	+	1	0	AGO1-4	0	0	0	0	1	0	0	11
MIMAT0000278	hsa-miR-221-3p	ENSG00000148737	TCF7L2	protein_coding	chr10	114925988	114925993	114925966	114925994	+	8	0	AGO1,AGO2	1	0	1	1	1	0	0	7
MIMAT0000278	hsa-miR-221-3p	ENSG00000196865	NHLRC2	protein_coding	chr10	115663416	115663438	115663416	115663438	+	10	0	AGO1-4,AGO2	0	0	0	0	1	0	0	14
MIMAT0000278	hsa-miR-221-3p	ENSG00000095627	TDRD1	protein_coding	chr10	115991990	115991995	115991990	115991995	+	4	0	AGO1-4	1	0	0	0	0	0	0	7
MIMAT0000278	hsa-miR-221-3p	ENSG00000151553	FAM160B1	protein_coding	chr10	116622664	116622670	116622649	116622671	+	4	0	AGO2	1	0	0	0	1	0	0	11
MIMAT0000278	hsa-miR-221-3p	ENSG00000165832	TRUB1	protein_coding	chr10	116736175	116736182	116736161	116736183	+	1	0	AGO2	1	0	0	0	1	0	0	11
MIMAT0000278	hsa-miR-221-3p	ENSG00000107518	ATRNL1	protein_coding	chr10	116881492	116881515	116881492	116881515	+	1	0	AGO2	0	0	0	0	1	0	0	11
MIMAT0000278	hsa-miR-221-3p	ENSG00000188613	NANOS1	protein_coding	chr10	120790853	120790858	120790853	120790859	+	1	0	AGO1-4	1	0	0	0	0	1	1	14
MIMAT0000278	hsa-miR-221-3p	ENSG00000151929	BAG3	protein_coding	chr10	121437101	121437106	121437101	121437106	+	8	0	AGO1-4	1	0	0	0	0	0	0	6
MIMAT0000278	hsa-miR-221-3p	ENSG00000107651	SEC23IP	protein_coding	chr10	121700406	121700411	121700390	121700412	+	5	0	AGO1-4,AGO2	1	0	0	0	1	0	1	10
MIMAT0000278	hsa-miR-221-3p	ENSG00000019995	ZRANB1	protein_coding	chr10	126675423	126675429	126675423	126675429	+	1	0	AGO1-4	1	0	0	0	0	0	0	10
MIMAT0000278	hsa-miR-221-3p	ENSG00000068383	INPP5A	protein_coding	chr10	134595585	134595590	134595585	134595590	+	3	0	AGO1-4,AGO2	1	0	0	0	0	0	0	10
MIMAT0000278	hsa-miR-221-3p	ENSG00000078902	TOLLIP	protein_coding	chr11	1297244	1297249	1297244	1297249	-	1	0	AGO1-4	1	0	0	0	0	0	0	7
MIMAT0000278	hsa-miR-221-3p	ENSG00000129757	CDKN1C	protein_coding	chr11	2904625	2904653	2904625	2904653	-	1	1	AGO2	0	0	0	1	0	0	0	11
MIMAT0000278	hsa-miR-221-3p	ENSG00000205531	NAP1L4	protein_coding	chr11	2966589	2966594	2966589	2966594	-	4	0	AGO1-4,AGO2	1	0	0	0	0	0	0	6
MIMAT0000278	hsa-miR-221-3p	ENSG00000021762	OSBPL5	protein_coding	chr11	3108459	3108464	3108459	3108464	-	1	0	AGO2	1	0	0	0	0	0	0	6
MIMAT0000278	hsa-miR-221-3p	ENSG00000170955	CAVIN3	protein_coding	chr11	6340326	6340332	6340325	6340345	-	8	0	AGO1-4	1	0	1	0	1	0	0	6
MIMAT0000278	hsa-miR-221-3p	ENSG00000130413	STK33	protein_coding	chr11	8413954	8413959	8413954	8413959	-	1	0	AGO1	1	0	0	0	0	0	0	14
MIMAT0000278	hsa-miR-221-3p	ENSG00000166444	ST5	protein_coding	chr11	8715103	8715108	8715103	8715108	-	1	0	AGO2	1	0	0	0	0	0	0	7
MIMAT0000278	hsa-miR-221-3p	ENSG00000175348	TMEM9B	protein_coding	chr11	8969359	8969366	8969359	8969366	-	13	0	AGO1-4,AGO2	1	0	0	0	0	0	0	7
MIMAT0000278	hsa-miR-221-3p	ENSG00000110315	RNF141	protein_coding	chr11	10536070	10536075	10536070	10536075	-	2	0	AGO1-4,AGO2	1	0	0	0	0	0	0	4
MIMAT0000278	hsa-miR-221-3p	ENSG00000110693	SOX6	protein_coding	chr11	15989131	15989136	15989131	15989136	-	1	0	AGO2	0	0	1	0	0	0	0	6
MIMAT0000278	hsa-miR-221-3p	ENSG00000198168	SVIP	protein_coding	chr11	22844078	22844084	22844077	22844105	-	1	0	AGO2	1	0	1	1	1	0	0	9
MIMAT0000278	hsa-miR-221-3p	ENSG00000110436	SLC1A2	protein_coding	chr11	35274370	35274375	35274370	35274375	-	1	0	AGO2	1	0	1	0	0	0	0	14
MIMAT0000278	hsa-miR-221-3p	ENSG00000110442	COMMD9	protein_coding	chr11	36295495	36295500	36295495	36295500	-	1	0	AGO1-4	1	0	0	0	0	0	0	4
MIMAT0000278	hsa-miR-221-3p	ENSG00000030066	NUP160	protein_coding	chr11	47800303	47800308	47800303	47800308	-	7	0	AGO1-4,AGO2	1	0	0	0	0	0	0	11
MIMAT0000278	hsa-miR-221-3p	ENSG00000149136	SSRP1	protein_coding	chr11	57093544	57093549	57093544	57093549	-	9	0	AGO1,AGO1-4,AGO2	1	0	0	0	0	0	0	7
MIMAT0000278	hsa-miR-221-3p	ENSG00000149485	FADS1	protein_coding	chr11	61568506	61568511	61568506	61568511	-	1	0	AGO1-4	1	0	0	0	0	0	0	12
MIMAT0000278	hsa-miR-221-3p	ENSG00000254470	AP5B1	protein_coding	chr11	65545262	65545267	65545262	65545267	-	1	0	AGO1-4	1	0	0	0	0	0	0	2
MIMAT0000278	hsa-miR-221-3p	ENSG00000175376	EIF1AD	protein_coding	chr11	65765236	65765241	65765236	65765241	-	5	0	AGO1-4,AGO2,AGO3	1	0	0	0	0	0	0	5
MIMAT0000278	hsa-miR-221-3p	ENSG00000173914	RBM4B	protein_coding	chr11	66432860	66432865	66432859	66432881	-	4	0	AGO1-4,AGO2	1	0	0	0	1	0	0	10
MIMAT0000278	hsa-miR-221-3p	ENSG00000110721	CHKA	protein_coding	chr11	67820473	67820480	67820473	67820480	-	5	0	AGO1-4,AGO2	1	0	0	0	0	0	0	8
MIMAT0000278	hsa-miR-221-3p	ENSG00000110066	KMT5B	protein_coding	chr11	67933287	67933292	67933287	67933292	-	2	0	AGO1-4	1	0	1	0	0	0	0	15
MIMAT0000278	hsa-miR-221-3p	ENSG00000132749	TESMIN	protein_coding	chr11	68503709	68503714	68503709	68503714	-	2	0	AGO1-4,AGO2	1	0	0	0	0	0	0	9
MIMAT0000278	hsa-miR-221-3p	ENSG00000149716	ORAOV1	protein_coding	chr11	69480554	69480559	69480554	69480559	-	1	0	AGO1-4	1	0	0	0	0	0	0	7
MIMAT0000278	hsa-miR-221-3p	ENSG00000162105	SHANK2	protein_coding	chr11	70314144	70314149	70314143	70314171	-	1	0	AGO1-4	1	0	1	1	1	1	1	12
MIMAT0000278	hsa-miR-221-3p	ENSG00000162129	CLPB	protein_coding	chr11	72003894	72003899	72003894	72003899	-	1	0	AGO1-4	1	0	0	0	0	0	0	10
MIMAT0000278	hsa-miR-221-3p	ENSG00000048649	RSF1	protein_coding	chr11	77376478	77376483	77376478	77376483	-	3	0	AGO1-4	0	0	1	0	0	0	0	8
MIMAT0000278	hsa-miR-221-3p	ENSG00000151366	NDUFC2	protein_coding	chr11	77780628	77780634	77780627	77780648	-	2	0	AGO2,AGO3	1	0	0	0	1	0	0	3
MIMAT0000278	hsa-miR-221-3p	ENSG00000188997	KCTD21	protein_coding	chr11	77883556	77883561	77883556	77883561	-	1	0	AGO1-4	1	0	1	0	0	0	0	3
MIMAT0000278	hsa-miR-221-3p	ENSG00000137502	RAB30	protein_coding	chr11	82684353	82684358	82684353	82684358	-	1	0	AGO1-4	0	0	1	0	0	0	0	12
MIMAT0000278	hsa-miR-221-3p	ENSG00000137504	CREBZF	protein_coding	chr11	85371898	85371904	85371897	85371925	-	1	0	AGO1-4	1	0	1	1	0	0	0	12
MIMAT0000278	hsa-miR-221-3p	ENSG00000174804	FZD4	protein_coding	chr11	86658919	86658924	86658919	86658924	-	1	0	AGO1-4	1	0	0	0	0	0	0	19
MIMAT0000278	hsa-miR-221-3p	ENSG00000109861	CTSC	protein_coding	chr11	88059505	88059510	88059505	88059510	-	2	0	AGO1-4,AGO2	1	0	1	0	0	0	0	4
MIMAT0000278	hsa-miR-221-3p	ENSG00000020922	MRE11	protein_coding	chr11	94152734	94152739	94152734	94152739	-	1	0	AGO1-4	1	0	0	0	0	0	0	8
MIMAT0000278	hsa-miR-221-3p	ENSG00000149212	SESN3	protein_coding	chr11	94899585	94899592	94899585	94899613	-	18	0	AGO1,AGO1-4,AGO2,AGO3	0	0	0	1	0	0	1	8
MIMAT0000278	hsa-miR-221-3p	ENSG00000087053	MTMR2	protein_coding	chr11	95568298	95568303	95568297	95568303	-	5	0	AGO1-4,AGO2	1	0	0	0	0	0	1	11
MIMAT0000278	hsa-miR-221-3p	ENSG00000196611	MMP1	protein_coding	chr11	102660976	102660982	102660975	102660997	-	5	0	AGO1-4,AGO2	1	0	1	0	1	0	0	1
MIMAT0000278	hsa-miR-221-3p	ENSG00000170962	PDGFD	protein_coding	chr11	103778199	103778205	103778198	103778226	-	1	0	AGO2	1	0	1	1	1	0	0	13
MIMAT0000278	hsa-miR-221-3p	ENSG00000152402	GUCY1A2	protein_coding	chr11	106556339	106556367	106556339	106556367	-	2	0	AGO1-4	0	0	0	1	0	0	0	13
MIMAT0000278	hsa-miR-221-3p	ENSG00000137710	RDX	protein_coding	chr11	110101263	110101268	110101263	110101268	-	5	0	AGO1-4,AGO2	1	0	0	0	0	0	0	8
MIMAT0000278	hsa-miR-221-3p	ENSG00000110367	DDX6	protein_coding	chr11	118620649	118620654	118620648	118620670	-	15	0	AGO1,AGO1-4,AGO2	1	0	0	0	1	1	0	9
MIMAT0000278	hsa-miR-221-3p	ENSG00000149428	HYOU1	protein_coding	chr11	118915160	118915165	118915160	118915165	-	38	0	AGO1-4,AGO2	1	0	0	0	0	0	0	6
MIMAT0000278	hsa-miR-221-3p	ENSG00000110400	NECTIN1	protein_coding	chr11	119533139	119533145	119533138	119533160	-	4	0	AGO1-4	1	1	0	0	0	0	0	7
MIMAT0000278	hsa-miR-221-3p	ENSG00000109971	HSPA8	protein_coding	chr11	122928420	122928426	122928419	122928440	-	27	1	AGO1,AGO1-4,AGO2	1	0	0	0	1	0	0	4
MIMAT0000278	hsa-miR-221-3p	ENSG00000064309	CDON	protein_coding	chr11	125827405	125827411	125827404	125827426	-	3	0	AGO2	1	0	0	0	1	0	1	12
MIMAT0000278	hsa-miR-221-3p	ENSG00000182934	SRPRA	protein_coding	chr11	126132928	126132933	126132928	126132933	-	26	0	AGO1,AGO1-4,AGO2	1	0	0	0	0	0	0	8
MIMAT0000278	hsa-miR-221-3p	ENSG00000134954	ETS1	protein_coding	chr11	128328719	128328724	128328718	128328746	-	4	0	AGO1-4,AGO2	1	0	1	1	0	0	0	6
MIMAT0000278	hsa-miR-221-3p	ENSG00000170325	PRDM10	protein_coding	chr11	129770032	129770038	129770031	129770056	-	1	1	AGO1-4	1	0	0	0	1	0	0	9
MIMAT0000278	hsa-miR-221-3p	ENSG00000120451	SNX19	protein_coding	chr11	130748161	130748166	130748161	130748166	-	1	0	AGO2	1	0	0	0	0	0	0	7
MIMAT0000278	hsa-miR-221-3p	ENSG00000167323	STIM1	protein_coding	chr11	4114075	4114080	4114075	4114080	+	2	0	AGO1,AGO2	1	0	0	0	0	0	0	4
MIMAT0000278	hsa-miR-221-3p	ENSG00000166402	TUB	protein_coding	chr11	8123639	8123645	8123618	8123646	+	8	0	AGO1,AGO2,AGO3	1	1	0	1	1	0	0	14
MIMAT0000278	hsa-miR-221-3p	ENSG00000166483	WEE1	protein_coding	chr11	9610727	9610732	9610711	9610733	+	57	0	AGO1,AGO1-4,AGO2,AGO3	1	0	0	0	1	0	1	5
MIMAT0000278	hsa-miR-221-3p	ENSG00000170242	USP47	protein_coding	chr11	11977723	11977738	11977723	11977738	+	6	0	AGO1-4,AGO2	0	0	0	0	1	0	0	13
MIMAT0000278	hsa-miR-221-3p	ENSG00000187079	TEAD1	protein_coding	chr11	12958961	12958966	12958939	12958967	+	4	0	AGO1,AGO1-4,AGO2	1	0	0	1	0	0	0	7
MIMAT0000278	hsa-miR-221-3p	ENSG00000151117	TMEM86A	protein_coding	chr11	18724337	18724342	18724337	18724342	+	1	0	AGO1-4	1	0	0	0	0	0	0	6
MIMAT0000278	hsa-miR-221-3p	ENSG00000187398	LUZP2	protein_coding	chr11	25101609	25101615	25101593	25101616	+	1	0	AGO2	1	0	0	0	1	0	0	8
MIMAT0000278	hsa-miR-221-3p	ENSG00000109911	ELP4	protein_coding	chr11	31806325	31806331	31806325	31806331	+	1	0	AGO1-4	0	0	0	0	0	0	1	9
MIMAT0000278	hsa-miR-221-3p	ENSG00000060749	QSER1	protein_coding	chr11	32999190	32999195	32999190	32999195	+	12	0	AGO1,AGO1-4,AGO2	1	0	0	0	0	0	0	7
MIMAT0000278	hsa-miR-221-3p	ENSG00000110422	HIPK3	protein_coding	chr11	33360364	33360386	33360358	33360386	+	3	0	AGO1-4,AGO2	0	0	0	1	1	0	0	9
MIMAT0000278	hsa-miR-221-3p	ENSG00000110427	KIAA1549L	protein_coding	chr11	33691000	33691005	33690978	33691006	+	2	0	AGO1-4,AGO2	1	0	1	1	0	0	0	3
MIMAT0000278	hsa-miR-221-3p	ENSG00000135387	CAPRIN1	protein_coding	chr11	34120264	34120269	34120264	34120270	+	5	0	AGO1,AGO2,AGO3	1	0	0	0	0	1	0	10
MIMAT0000278	hsa-miR-221-3p	ENSG00000026508	CD44	protein_coding	chr11	35253580	35253585	35253580	35253585	+	1	0	AGO1-4	1	0	0	0	0	0	0	2
MIMAT0000278	hsa-miR-221-3p	ENSG00000110455	ACCS	protein_coding	chr11	44105492	44105497	44105492	44105497	+	1	0	AGO1-4	1	0	0	0	0	0	0	5
MIMAT0000278	hsa-miR-221-3p	ENSG00000019485	PRDM11	protein_coding	chr11	45251731	45251737	45251731	45251737	+	2	0	AGO1-4,AGO2	0	0	0	0	0	1	0	10
MIMAT0000278	hsa-miR-221-3p	ENSG00000121671	CRY2	protein_coding	chr11	45902682	45902687	45902682	45902687	+	2	0	AGO1,AGO2	1	0	0	0	0	0	0	17
MIMAT0000278	hsa-miR-221-3p	ENSG00000165915	SLC39A13	protein_coding	chr11	47437136	47437143	47437136	47437143	+	3	0	AGO1-4,AGO2	1	0	0	0	0	0	0	4
MIMAT0000278	hsa-miR-221-3p	ENSG00000149177	PTPRJ	protein_coding	chr11	48192143	48192148	48192143	48192148	+	4	0	AGO1-4,AGO2	1	0	0	0	0	0	0	7
MIMAT0000278	hsa-miR-221-3p	ENSG00000242689	CNTF	protein_coding	chr11	58390252	58390280	58390252	58390280	+	1	0	AGO2	0	0	0	1	0	0	0	5
MIMAT0000278	hsa-miR-221-3p	ENSG00000255073	ZFP91-CNTF	protein_coding	chr11	58390252	58390280	58390252	58390280	+	1	0	AGO2	0	0	0	1	0	0	0	3
MIMAT0000278	hsa-miR-221-3p	ENSG00000156738	MS4A1	protein_coding	chr11	60236095	60236117	60236089	60236117	+	1	0	AGO2	0	0	0	1	1	0	0	2
MIMAT0000278	hsa-miR-221-3p	ENSG00000149503	INCENP	protein_coding	chr11	61919844	61919849	61919844	61919849	+	3	0	AGO1-4,AGO2	1	0	0	0	0	0	0	4
MIMAT0000278	hsa-miR-221-3p	ENSG00000168002	POLR2G	protein_coding	chr11	62534116	62534121	62534116	62534121	+	8	0	AGO1-4,AGO2	1	0	0	0	0	0	0	7
MIMAT0000278	hsa-miR-221-3p	ENSG00000133318	RTN3	protein_coding	chr11	63525949	63525954	63525949	63525954	+	7	0	AGO1-4,AGO2	1	0	0	0	0	0	0	9
MIMAT0000278	hsa-miR-221-3p	ENSG00000173933	RBM4	protein_coding	chr11	66413710	66413715	66413694	66413716	+	10	0	AGO1,AGO1-4,AGO2,AGO3	1	0	0	0	1	0	0	8
MIMAT0000278	hsa-miR-221-3p	ENSG00000248643	RBM14-RBM4	protein_coding	chr11	66413710	66413715	66413694	66413716	+	10	0	AGO1,AGO1-4,AGO2,AGO3	1	0	0	0	1	0	0	8
MIMAT0000278	hsa-miR-221-3p	ENSG00000173120	KDM2A	protein_coding	chr11	67024047	67024052	67024047	67024052	+	12	0	AGO1-4,AGO2	1	0	0	0	0	0	0	4
MIMAT0000278	hsa-miR-221-3p	ENSG00000110092	CCND1	protein_coding	chr11	69468516	69468521	69468516	69468521	+	24	0	AGO1-4,AGO2	1	0	0	0	0	0	0	4
MIMAT0000278	hsa-miR-221-3p	ENSG00000131626	PPFIA1	protein_coding	chr11	70189813	70189840	70189813	70189840	+	5	0	AGO1-4	0	0	0	0	1	0	0	9
MIMAT0000278	hsa-miR-221-3p	ENSG00000085733	CTTN	protein_coding	chr11	70282616	70282621	70282600	70282622	+	11	0	AGO1,AGO1-4,AGO2	1	0	0	0	1	1	1	3
MIMAT0000278	hsa-miR-221-3p	ENSG00000214517	PPME1	protein_coding	chr11	73965617	73965622	73965617	73965622	+	7	0	AGO1-4,AGO2	1	0	0	0	0	0	0	8
MIMAT0000278	hsa-miR-221-3p	ENSG00000166439	RNF169	protein_coding	chr11	74551169	74551175	74551169	74551175	+	1	0	AGO2	1	0	0	0	0	0	0	5
MIMAT0000278	hsa-miR-221-3p	ENSG00000118363	SPCS2	protein_coding	chr11	74688267	74688272	74688267	74688272	+	2	0	AGO1-4	1	0	1	0	0	0	0	8
MIMAT0000278	hsa-miR-221-3p	ENSG00000162139	NEU3	protein_coding	chr11	74718440	74718446	74718423	74718447	+	2	0	AGO2	1	0	1	0	1	0	0	13
MIMAT0000278	hsa-miR-221-3p	ENSG00000158636	EMSY	protein_coding	chr11	76164491	76164513	76164491	76164513	+	1	0	AGO2	0	0	0	0	1	0	0	10
MIMAT0000278	hsa-miR-221-3p	ENSG00000078124	ACER3	protein_coding	chr11	76732608	76732613	76732608	76732613	+	1	0	AGO2	1	0	0	0	0	0	0	5
MIMAT0000278	hsa-miR-221-3p	ENSG00000118369	USP35	protein_coding	chr11	77925626	77925631	77925626	77925631	+	1	0	AGO2	1	0	0	0	0	0	0	9
MIMAT0000278	hsa-miR-221-3p	ENSG00000166004	CEP295	protein_coding	chr11	93463474	93463480	93463453	93463481	+	4	0	AGO2	0	0	1	1	1	0	0	9
MIMAT0000278	hsa-miR-221-3p	ENSG00000165895	ARHGAP42	protein_coding	chr11	100859673	100859678	100859657	100859679	+	6	0	AGO1,AGO1-4,AGO2	0	0	1	0	1	1	1	12
MIMAT0000278	hsa-miR-221-3p	ENSG00000137693	YAP1	protein_coding	chr11	102101495	102101500	102101495	102101500	+	5	0	AGO1-4,AGO2	1	0	0	0	0	0	0	4
MIMAT0000278	hsa-miR-221-3p	ENSG00000166266	CUL5	protein_coding	chr11	107976080	107976085	107976080	107976085	+	1	0	AGO2	1	0	1	0	0	0	0	6
MIMAT0000278	hsa-miR-221-3p	ENSG00000149289	ZC3H12C	protein_coding	chr11	110041247	110041252	110041247	110041252	+	2	0	AGO2	1	0	0	0	0	0	0	5
MIMAT0000278	hsa-miR-221-3p	ENSG00000150787	PTS	protein_coding	chr11	112104166	112104172	112104166	112104172	+	1	0	AGO1-4	0	0	1	0	0	0	1	6
MIMAT0000278	hsa-miR-221-3p	ENSG00000110344	UBE4A	protein_coding	chr11	118269155	118269160	118269155	118269160	+	13	0	AGO1,AGO1-4,AGO2	1	0	0	0	0	0	0	7
MIMAT0000278	hsa-miR-221-3p	ENSG00000118058	KMT2A	protein_coding	chr11	118393842	118393847	118393826	118393848	+	1	0	AGO1-4	1	0	1	0	1	1	1	6
MIMAT0000278	hsa-miR-221-3p	ENSG00000149582	TMEM25	protein_coding	chr11	118405743	118405749	118405728	118405750	+	3	0	AGO2	1	0	1	0	1	0	0	7
MIMAT0000278	hsa-miR-221-3p	ENSG00000110395	CBL	protein_coding	chr11	119174344	119174349	119174344	119174349	+	3	0	AGO1-4,AGO2	1	0	0	0	0	0	0	5
MIMAT0000278	hsa-miR-221-3p	ENSG00000196914	ARHGEF12	protein_coding	chr11	120356497	120356502	120356497	120356502	+	2	0	AGO1-4,AGO2	1	0	0	0	0	0	0	8
MIMAT0000278	hsa-miR-221-3p	ENSG00000109929	SC5D	protein_coding	chr11	121178930	121178936	121178909	121178937	+	3	0	AGO1-4,AGO2	1	0	1	1	1	0	0	7
MIMAT0000278	hsa-miR-221-3p	ENSG00000109944	JHY	protein_coding	chr11	122830499	122830505	122830499	122830505	+	1	0	AGO1-4	0	0	1	0	0	0	0	9
MIMAT0000278	hsa-miR-221-3p	ENSG00000084234	APLP2	protein_coding	chr11	130003579	130003601	130003579	130003601	+	5	0	AGO1-4,AGO2	0	1	0	0	0	0	0	3
MIMAT0000278	hsa-miR-221-3p	ENSG00000166086	JAM3	protein_coding	chr11	134020455	134020461	134020455	134020461	+	1	0	AGO2	1	0	0	0	0	0	0	10
MIMAT0000278	hsa-miR-221-3p	ENSG00000059804	SLC2A3	protein_coding	chr12	8072559	8072566	8072559	8072566	-	14	0	AGO1-4,AGO2	1	0	0	0	0	0	0	9
MIMAT0000278	hsa-miR-221-3p	ENSG00000003056	M6PR	protein_coding	chr12	9094105	9094110	9094105	9094110	-	2	0	AGO1,AGO2	1	0	0	0	0	0	0	2
MIMAT0000278	hsa-miR-221-3p	ENSG00000070018	LRP6	protein_coding	chr12	12270636	12270641	12270636	12270641	-	4	0	AGO1-4,AGO2	1	0	1	0	0	0	0	11
MIMAT0000278	hsa-miR-221-3p	ENSG00000111341	MGP	protein_coding	chr12	15035005	15035010	15035005	15035010	-	4	0	AGO1-4	1	0	0	0	0	0	0	9
MIMAT0000278	hsa-miR-221-3p	ENSG00000060982	BCAT1	protein_coding	chr12	24966789	24966794	24966789	24966794	-	3	0	AGO2	1	0	0	0	0	0	0	5
MIMAT0000278	hsa-miR-221-3p	ENSG00000110888	CAPRIN2	protein_coding	chr12	30862624	30862629	30862623	30862651	-	28	0	AGO1,AGO1-4,AGO2,AGO3	1	0	0	1	1	1	1	6
MIMAT0000278	hsa-miR-221-3p	ENSG00000170456	DENND5B	protein_coding	chr12	31536174	31536181	31536174	31536181	-	1	0	AGO2	1	0	0	0	0	0	0	15
MIMAT0000278	hsa-miR-221-3p	ENSG00000139117	CPNE8	protein_coding	chr12	39046813	39046818	39046812	39046832	-	2	0	AGO2	1	0	1	0	1	1	1	8
MIMAT0000278	hsa-miR-221-3p	ENSG00000151229	SLC2A13	protein_coding	chr12	40149875	40149880	40149875	40149880	-	1	0	AGO2	1	0	1	0	0	0	0	10
MIMAT0000278	hsa-miR-221-3p	ENSG00000139168	ZCRB1	protein_coding	chr12	42706536	42706541	42706535	42706563	-	3	0	AGO1,AGO2	1	0	1	1	0	0	0	9
MIMAT0000278	hsa-miR-221-3p	ENSG00000139218	SCAF11	protein_coding	chr12	46313056	46313062	46313055	46313078	-	3	0	AGO1-4,AGO2	1	0	0	0	1	0	0	6
MIMAT0000278	hsa-miR-221-3p	ENSG00000111371	SLC38A1	protein_coding	chr12	46581312	46581317	46581312	46581317	-	2	0	AGO1-4	1	0	0	0	0	0	0	6
MIMAT0000278	hsa-miR-221-3p	ENSG00000169884	WNT10B	protein_coding	chr12	49359707	49359712	49359707	49359712	-	2	0	AGO2	1	0	0	0	0	0	0	7
MIMAT0000278	hsa-miR-221-3p	ENSG00000167552	TUBA1A	protein_coding	chr12	49578698	49578704	49578697	49578725	-	8	0	AGO1-4	1	0	1	1	1	0	1	14
MIMAT0000278	hsa-miR-221-3p	ENSG00000170653	ATF7	protein_coding	chr12	53906203	53906209	53906202	53906223	-	2	0	AGO1-4,AGO2	0	0	1	0	1	0	1	13
MIMAT0000278	hsa-miR-221-3p	ENSG00000094916	CBX5	protein_coding	chr12	54625031	54625036	54625030	54625058	-	8	2	AGO1,AGO1-4,AGO2	0	0	1	1	0	0	0	12
MIMAT0000278	hsa-miR-221-3p	ENSG00000161642	ZNF385A	protein_coding	chr12	54762995	54763000	54762994	54763022	-	6	3	AGO1-4,AGO2	1	0	1	1	1	1	1	5
MIMAT0000278	hsa-miR-221-3p	ENSG00000135392	DNAJC14	protein_coding	chr12	56215071	56215076	56215070	56215091	-	1	0	AGO1-4	1	0	0	0	1	1	1	8
MIMAT0000278	hsa-miR-221-3p	ENSG00000139645	ANKRD52	protein_coding	chr12	56635579	56635584	56635578	56635600	-	22	0	AGO1,AGO1-4,AGO2,AGO3	1	0	0	0	1	1	1	11
MIMAT0000278	hsa-miR-221-3p	ENSG00000166860	ZBTB39	protein_coding	chr12	57395524	57395529	57395524	57395529	-	4	0	AGO1-4	1	0	0	0	0	0	0	11
MIMAT0000278	hsa-miR-221-3p	ENSG00000111110	PPM1H	protein_coding	chr12	63038266	63038272	63038265	63038287	-	6	0	AGO1-4,AGO2	1	0	0	0	1	0	0	16
MIMAT0000278	hsa-miR-221-3p	ENSG00000135677	GNS	protein_coding	chr12	65110092	65110097	65110091	65110119	-	1	0	AGO2	1	0	1	1	0	0	0	11
MIMAT0000278	hsa-miR-221-3p	ENSG00000139289	PHLDA1	protein_coding	chr12	76421229	76421234	76421229	76421234	-	2	0	AGO1-4	1	0	0	0	0	0	0	1
MIMAT0000278	hsa-miR-221-3p	ENSG00000187109	NAP1L1	protein_coding	chr12	76441942	76441948	76441941	76441963	-	2	0	AGO1-4,AGO2	1	0	1	0	1	0	1	7
MIMAT0000278	hsa-miR-221-3p	ENSG00000091039	OSBPL8	protein_coding	chr12	76747113	76747120	76747112	76747132	-	3	0	AGO2	1	0	0	0	1	0	0	7
MIMAT0000278	hsa-miR-221-3p	ENSG00000165891	E2F7	protein_coding	chr12	77416917	77416922	77416917	77416922	-	4	0	AGO2	1	0	0	0	0	0	0	2
MIMAT0000278	hsa-miR-221-3p	ENSG00000072041	SLC6A15	protein_coding	chr12	85276253	85276258	85276253	85276258	-	1	0	AGO1	1	0	0	0	0	0	0	6
MIMAT0000278	hsa-miR-221-3p	ENSG00000177889	UBE2N	protein_coding	chr12	93802342	93802348	93802341	93802363	-	4	0	AGO1,AGO2	1	0	1	0	1	0	0	10
MIMAT0000278	hsa-miR-221-3p	ENSG00000173588	CEP83	protein_coding	chr12	94762833	94762838	94762833	94762838	-	1	0	AGO1-4	0	0	1	0	0	0	0	12
MIMAT0000278	hsa-miR-221-3p	ENSG00000059758	CDK17	protein_coding	chr12	96672459	96672464	96672459	96672464	-	7	0	AGO1-4,AGO2	1	0	0	0	0	0	0	7
MIMAT0000278	hsa-miR-221-3p	ENSG00000185046	ANKS1B	protein_coding	chr12	99137946	99137952	99137946	99137952	-	1	0	AGO2	0	0	1	0	0	0	0	14
MIMAT0000278	hsa-miR-221-3p	ENSG00000017427	IGF1	protein_coding	chr12	102792665	102792671	102792664	102792688	-	2	0	AGO1-4,AGO2	1	0	0	0	1	0	1	11
MIMAT0000278	hsa-miR-221-3p	ENSG00000120837	NFYB	protein_coding	chr12	104513391	104513397	104513390	104513418	-	22	0	AGO1,AGO1-4,AGO2,AGO3	1	0	1	1	1	0	1	13
MIMAT0000278	hsa-miR-221-3p	ENSG00000008405	CRY1	protein_coding	chr12	107385297	107385302	107385297	107385302	-	2	0	AGO1-4,AGO2	1	0	0	0	0	0	0	14
MIMAT0000278	hsa-miR-221-3p	ENSG00000110880	CORO1C	protein_coding	chr12	109039108	109039113	109039108	109039113	-	2	0	AGO2	1	0	1	0	0	0	0	8
MIMAT0000278	hsa-miR-221-3p	ENSG00000110906	KCTD10	protein_coding	chr12	109886513	109886535	109886513	109886535	-	10	0	AGO1,AGO2	0	0	0	0	1	0	0	8
MIMAT0000278	hsa-miR-221-3p	ENSG00000174456	C12orf76	protein_coding	chr12	110479995	110480000	110479995	110480000	-	4	0	AGO1,AGO1-4,AGO2	1	0	0	0	0	0	0	10
MIMAT0000278	hsa-miR-221-3p	ENSG00000196850	PPTC7	protein_coding	chr12	110972762	110972768	110972761	110972784	-	1	0	AGO1-4	1	0	0	0	1	0	0	5
MIMAT0000278	hsa-miR-221-3p	ENSG00000111300	NAA25	protein_coding	chr12	112465266	112465271	112465265	112465293	-	4	0	AGO1,AGO2	1	0	0	1	1	1	1	7
MIMAT0000278	hsa-miR-221-3p	ENSG00000122965	RBM19	protein_coding	chr12	114260780	114260785	114260780	114260785	-	1	0	AGO2	1	0	0	0	0	0	0	5
MIMAT0000278	hsa-miR-221-3p	ENSG00000135111	TBX3	protein_coding	chr12	115108834	115108839	115108834	115108839	-	7	0	AGO1,AGO1-4,AGO2,AGO3	1	0	0	0	0	0	0	9
MIMAT0000278	hsa-miR-221-3p	ENSG00000123066	MED13L	protein_coding	chr12	116398816	116398821	116398816	116398821	-	5	0	AGO1-4	1	0	0	0	0	0	0	10
MIMAT0000278	hsa-miR-221-3p	ENSG00000176871	WSB2	protein_coding	chr12	118471870	118471876	118471869	118471897	-	14	0	AGO1-4,AGO2	1	0	1	1	1	0	1	17
MIMAT0000278	hsa-miR-221-3p	ENSG00000122966	CIT	protein_coding	chr12	120124917	120124922	120124916	120124934	-	1	0	AGO2	1	1	0	0	0	1	0	8
MIMAT0000278	hsa-miR-221-3p	ENSG00000089159	PXN	protein_coding	chr12	120649904	120649909	120649904	120649909	-	1	0	AGO1-4	1	0	0	0	0	0	0	2
MIMAT0000278	hsa-miR-221-3p	ENSG00000157837	SPPL3	protein_coding	chr12	121201873	121201878	121201872	121201897	-	6	1	AGO1,AGO1-4,AGO2	1	0	1	0	1	0	1	10
MIMAT0000278	hsa-miR-221-3p	ENSG00000110931	CAMKK2	protein_coding	chr12	121677219	121677224	121677219	121677224	-	1	0	AGO1-4	1	0	0	0	0	0	0	10
MIMAT0000278	hsa-miR-221-3p	ENSG00000111011	RSRC2	protein_coding	chr12	122989542	122989547	122989541	122989563	-	4	0	AGO1,AGO1-4	1	0	0	0	1	0	1	11
MIMAT0000278	hsa-miR-221-3p	ENSG00000090975	PITPNM2	protein_coding	chr12	123469028	123469034	123469027	123469049	-	4	0	AGO1-4,AGO2	1	0	0	0	1	0	1	11
MIMAT0000278	hsa-miR-221-3p	ENSG00000051825	MPHOSPH9	protein_coding	chr12	123641343	123641353	123641343	123641353	-	5	0	AGO1,AGO1-4,AGO2	0	0	0	0	1	0	0	14
MIMAT0000278	hsa-miR-221-3p	ENSG00000188026	RILPL1	protein_coding	chr12	123956443	123956464	123956443	123956464	-	1	0	AGO1-4	0	0	0	0	1	0	0	3
MIMAT0000278	hsa-miR-221-3p	ENSG00000176915	ANKLE2	protein_coding	chr12	133302445	133302450	133302445	133302450	-	2	0	AGO1-4	1	0	0	0	0	0	0	4
MIMAT0000278	hsa-miR-221-3p	ENSG00000196458	ZNF605	protein_coding	chr12	133499630	133499635	133499630	133499635	-	1	0	AGO2	1	0	0	0	0	0	0	11
MIMAT0000278	hsa-miR-221-3p	ENSG00000118971	CCND2	protein_coding	chr12	4409936	4409942	4409915	4409943	+	6	0	AGO1,AGO1-4,AGO2	1	0	1	1	0	0	0	11
MIMAT0000278	hsa-miR-221-3p	ENSG00000010610	CD4	protein_coding	chr12	6928573	6928578	6928551	6928579	+	1	0	AGO1-4	1	0	1	1	1	1	1	7
MIMAT0000278	hsa-miR-221-3p	ENSG00000111667	USP5	protein_coding	chr12	6975583	6975588	6975583	6975588	+	1	0	AGO2	1	0	0	0	0	0	0	10
MIMAT0000278	hsa-miR-221-3p	ENSG00000111752	PHC1	protein_coding	chr12	9092526	9092533	9092526	9092533	+	1	0	AGO2	1	0	0	0	0	0	0	18
MIMAT0000278	hsa-miR-221-3p	ENSG00000111269	CREBL2	protein_coding	chr12	12797687	12797693	12797671	12797694	+	3	0	AGO1,AGO2	1	0	1	0	1	0	0	12
MIMAT0000278	hsa-miR-221-3p	ENSG00000111276	CDKN1B	protein_coding	chr12	12874163	12874168	12874141	12874169	+	45	0	AGO1,AGO1-4,AGO2,AGO3	1	0	1	1	1	1	1	16
MIMAT0000278	hsa-miR-221-3p	ENSG00000178878	APOLD1	protein_coding	chr12	12940649	12940654	12940627	12940655	+	1	0	AGO2	1	0	1	1	0	0	0	11
MIMAT0000278	hsa-miR-221-3p	ENSG00000134531	EMP1	protein_coding	chr12	13368558	13368563	13368558	13368563	+	2	0	AGO1-4	1	0	0	0	0	0	0	3
MIMAT0000278	hsa-miR-221-3p	ENSG00000023734	STRAP	protein_coding	chr12	16056205	16056210	16056189	16056211	+	8	0	AGO1,AGO1-4,AGO2	1	0	0	0	1	0	0	12
MIMAT0000278	hsa-miR-221-3p	ENSG00000123094	RASSF8	protein_coding	chr12	26222002	26222008	26222002	26222008	+	8	0	AGO1-4,AGO2	0	0	0	0	0	1	0	9
MIMAT0000278	hsa-miR-221-3p	ENSG00000211455	STK38L	protein_coding	chr12	27478150	27478156	27478129	27478157	+	1	0	AGO1-4	1	0	0	1	1	0	0	7
MIMAT0000278	hsa-miR-221-3p	ENSG00000110841	PPFIBP1	protein_coding	chr12	27846183	27846188	27846183	27846188	+	2	0	AGO1-4	1	0	0	0	0	0	0	6
MIMAT0000278	hsa-miR-221-3p	ENSG00000061794	MRPS35	protein_coding	chr12	27909124	27909130	27909109	27909131	+	7	1	AGO1,AGO1-4,AGO2	1	0	1	0	1	0	0	12
MIMAT0000278	hsa-miR-221-3p	ENSG00000139160	ETFBKMT	protein_coding	chr12	31821237	31821242	31821237	31821242	+	1	0	AGO2	1	0	1	0	0	0	0	14
MIMAT0000278	hsa-miR-221-3p	ENSG00000087470	DNM1L	protein_coding	chr12	32884410	32884431	32884410	32884431	+	1	0	AGO1-4	0	0	0	0	1	0	0	6
MIMAT0000278	hsa-miR-221-3p	ENSG00000189079	ARID2	protein_coding	chr12	46301255	46301260	46301255	46301260	+	1	0	AGO2	1	0	0	0	0	0	0	14
MIMAT0000278	hsa-miR-221-3p	ENSG00000167535	CACNB3	protein_coding	chr12	49222435	49222440	49222435	49222440	+	1	0	AGO1-4	1	0	0	0	0	0	0	19
MIMAT0000278	hsa-miR-221-3p	ENSG00000139644	TMBIM6	protein_coding	chr12	50156916	50156921	50156916	50156921	+	26	0	AGO1,AGO1-4,AGO2,AGO3	1	0	0	0	0	0	0	11
MIMAT0000278	hsa-miR-221-3p	ENSG00000066117	SMARCD1	protein_coding	chr12	50493303	50493308	50493303	50493308	+	4	0	AGO1-4	1	0	0	0	0	0	0	10
MIMAT0000278	hsa-miR-221-3p	ENSG00000161813	LARP4	protein_coding	chr12	50871008	50871013	50871008	50871013	+	5	0	AGO1,AGO1-4,AGO2	1	0	0	0	0	0	0	10
MIMAT0000278	hsa-miR-221-3p	ENSG00000066084	DIP2B	protein_coding	chr12	51140983	51140988	51140983	51140988	+	1	0	AGO1-4	1	0	0	0	0	0	0	9
MIMAT0000278	hsa-miR-221-3p	ENSG00000205352	PRR13	protein_coding	chr12	53839924	53839931	53839910	53839932	+	6	0	AGO1-4,AGO2	1	0	0	0	1	0	0	4
MIMAT0000278	hsa-miR-221-3p	ENSG00000180818	HOXC10	protein_coding	chr12	54384004	54384009	54383982	54384010	+	1	0	AGO2	1	0	1	1	1	1	0	8
MIMAT0000278	hsa-miR-221-3p	ENSG00000135486	HNRNPA1	protein_coding	chr12	54678167	54678173	54678150	54678174	+	8	0	AGO1-4,AGO2	0	0	1	0	1	0	0	11
MIMAT0000278	hsa-miR-221-3p	ENSG00000111481	COPZ1	protein_coding	chr12	54744627	54744632	54744627	54744632	+	9	0	AGO1-4,AGO2	1	0	0	0	0	0	0	10
MIMAT0000278	hsa-miR-221-3p	ENSG00000123374	CDK2	protein_coding	chr12	56366535	56366540	56366535	56366540	+	1	0	AGO2	1	0	0	0	0	0	0	7
MIMAT0000278	hsa-miR-221-3p	ENSG00000123411	IKZF4	protein_coding	chr12	56429207	56429212	56429185	56429213	+	2	1	AGO1-4	1	0	1	1	0	0	0	14
MIMAT0000278	hsa-miR-221-3p	ENSG00000065361	ERBB3	protein_coding	chr12	56496014	56496020	56496000	56496021	+	8	0	AGO1-4,AGO2	1	0	1	0	1	0	1	8
MIMAT0000278	hsa-miR-221-3p	ENSG00000139641	ESYT1	protein_coding	chr12	56538089	56538116	56538089	56538116	+	2	6	AGO2	0	0	0	0	1	0	0	11
MIMAT0000278	hsa-miR-221-3p	ENSG00000139579	NABP2	protein_coding	chr12	56623078	56623083	56623078	56623083	+	2	0	AGO1-4	1	0	0	0	0	0	0	11
MIMAT0000278	hsa-miR-221-3p	ENSG00000166987	MBD6	protein_coding	chr12	57923591	57923596	57923591	57923596	+	5	0	AGO1-4,AGO2	1	0	0	0	0	0	0	13
MIMAT0000278	hsa-miR-221-3p	ENSG00000178498	DTX3	protein_coding	chr12	58003541	58003546	58003519	58003547	+	3	0	AGO1-4,AGO2	1	0	0	1	0	0	0	16
MIMAT0000278	hsa-miR-221-3p	ENSG00000135655	USP15	protein_coding	chr12	62803147	62803167	62803147	62803167	+	1	0	AGO2	0	1	0	0	0	0	0	5
MIMAT0000278	hsa-miR-221-3p	ENSG00000061987	MON2	protein_coding	chr12	62987347	62987352	62987347	62987353	+	7	0	AGO1-4,AGO2	1	0	0	0	0	0	1	10
MIMAT0000278	hsa-miR-221-3p	ENSG00000196935	SRGAP1	protein_coding	chr12	64536767	64536774	64536767	64536774	+	6	0	AGO1-4,AGO2	1	0	0	0	0	0	0	9
MIMAT0000278	hsa-miR-221-3p	ENSG00000174099	MSRB3	protein_coding	chr12	65858673	65858679	65858673	65858679	+	1	0	AGO2	1	0	0	0	0	0	0	11
MIMAT0000278	hsa-miR-221-3p	ENSG00000111530	CAND1	protein_coding	chr12	67706773	67706778	67706757	67706779	+	13	0	AGO1-4,AGO2	1	0	1	0	1	0	1	12
MIMAT0000278	hsa-miR-221-3p	ENSG00000127334	DYRK2	protein_coding	chr12	68052921	68052926	68052921	68052926	+	2	0	AGO1-4	1	0	0	0	0	0	0	12
MIMAT0000278	hsa-miR-221-3p	ENSG00000127314	RAP1B	protein_coding	chr12	69053468	69053490	69053468	69053490	+	5	0	AGO1,AGO1-4,AGO2	0	0	0	0	1	0	0	6
MIMAT0000278	hsa-miR-221-3p	ENSG00000135679	MDM2	protein_coding	chr12	69233815	69233821	69233794	69233822	+	36	0	AGO1,AGO1-4,AGO2,AGO3	1	0	1	1	1	0	0	8
MIMAT0000278	hsa-miR-221-3p	ENSG00000111605	CPSF6	protein_coding	chr12	69666072	69666077	69666072	69666077	+	2	0	AGO1-4,AGO2	0	0	1	0	0	0	0	12
MIMAT0000278	hsa-miR-221-3p	ENSG00000166225	FRS2	protein_coding	chr12	69970035	69970040	69970035	69970040	+	10	0	AGO1-4,AGO2	1	0	1	0	0	0	0	13
MIMAT0000278	hsa-miR-221-3p	ENSG00000111596	CNOT2	protein_coding	chr12	70748086	70748091	70748067	70748092	+	2	0	AGO1-4,AGO2	1	0	0	0	1	1	1	11
MIMAT0000278	hsa-miR-221-3p	ENSG00000135643	KCNMB4	protein_coding	chr12	70824627	70824632	70824627	70824632	+	1	0	AGO2	1	0	0	0	0	0	0	7
MIMAT0000278	hsa-miR-221-3p	ENSG00000139291	TMEM19	protein_coding	chr12	72095713	72095718	72095713	72095718	+	9	0	AGO1,AGO1-4,AGO2	1	0	0	0	0	0	0	7
MIMAT0000278	hsa-miR-221-3p	ENSG00000186908	ZDHHC17	protein_coding	chr12	77203548	77203572	77203548	77203572	+	1	0	AGO2	0	0	0	0	1	0	0	11
MIMAT0000278	hsa-miR-221-3p	ENSG00000136040	PLXNC1	protein_coding	chr12	94701070	94701076	94701049	94701077	+	1	0	AGO1-4	0	0	1	1	0	0	1	9
MIMAT0000278	hsa-miR-221-3p	ENSG00000028203	VEZT	protein_coding	chr12	95695465	95695470	95695465	95695470	+	4	0	AGO1-4	1	0	0	0	0	0	0	7
MIMAT0000278	hsa-miR-221-3p	ENSG00000120802	TMPO	protein_coding	chr12	98942203	98942208	98942203	98942208	+	12	0	AGO1,AGO1-4,AGO2,AGO4	1	0	0	0	0	0	0	10
MIMAT0000278	hsa-miR-221-3p	ENSG00000120868	APAF1	protein_coding	chr12	99126498	99126504	99126477	99126505	+	5	0	AGO1,AGO1-4,AGO2	1	0	1	1	1	0	0	8
MIMAT0000278	hsa-miR-221-3p	ENSG00000139372	TDG	protein_coding	chr12	104382389	104382394	104382389	104382394	+	7	0	AGO1,AGO1-4,AGO2	1	0	0	0	0	0	0	13
MIMAT0000278	hsa-miR-221-3p	ENSG00000151148	UBE3B	protein_coding	chr12	109974447	109974452	109974447	109974452	+	4	0	AGO1-4	1	0	0	0	0	0	0	9
MIMAT0000278	hsa-miR-221-3p	ENSG00000179295	PTPN11	protein_coding	chr12	112945310	112945315	112945310	112945315	+	1	0	AGO1-4	1	0	0	0	0	0	0	11
MIMAT0000278	hsa-miR-221-3p	ENSG00000111331	OAS3	protein_coding	chr12	113382951	113382973	113382951	113382973	+	1	0	AGO1-4	0	0	0	0	1	0	0	2
MIMAT0000278	hsa-miR-221-3p	ENSG00000111335	OAS2	protein_coding	chr12	113447119	113447124	113447119	113447124	+	2	0	AGO1-4,AGO2	1	0	0	0	0	0	0	1
MIMAT0000278	hsa-miR-221-3p	ENSG00000135119	RNFT2	protein_coding	chr12	117290601	117290606	117290601	117290606	+	1	0	AGO1-4	1	0	1	0	0	0	0	14
MIMAT0000278	hsa-miR-221-3p	ENSG00000174989	FBXW8	protein_coding	chr12	117468472	117468479	117468472	117468479	+	1	0	AGO1-4	1	0	0	0	0	0	0	15
MIMAT0000278	hsa-miR-221-3p	ENSG00000111707	SUDS3	protein_coding	chr12	118854940	118854945	118854940	118854945	+	4	0	AGO1-4,AGO2	1	0	0	0	0	0	0	11
MIMAT0000278	hsa-miR-221-3p	ENSG00000135127	BICDL1	protein_coding	chr12	120532160	120532165	120532144	120532166	+	4	0	AGO1-4,AGO2	1	0	1	0	1	1	1	15
MIMAT0000278	hsa-miR-221-3p	ENSG00000110917	MLEC	protein_coding	chr12	121136149	121136154	121136149	121136154	+	7	0	AGO1-4,AGO2	1	0	1	0	0	0	0	11
MIMAT0000278	hsa-miR-221-3p	ENSG00000135100	HNF1A	protein_coding	chr12	121440247	121440252	121440247	121440252	+	1	0	AGO2	1	0	0	0	0	0	0	13
MIMAT0000278	hsa-miR-221-3p	ENSG00000135124	P2RX4	protein_coding	chr12	121671779	121671784	121671779	121671784	+	2	0	AGO1-4,AGO2	1	0	0	0	0	0	0	11
MIMAT0000278	hsa-miR-221-3p	ENSG00000139364	TMEM132B	protein_coding	chr12	126139690	126139696	126139673	126139697	+	2	0	AGO2,AGO3	1	0	0	0	1	0	1	7
MIMAT0000278	hsa-miR-221-3p	ENSG00000165474	GJB2	protein_coding	chr13	20762292	20762297	20762292	20762297	-	1	0	AGO2	1	0	0	0	0	0	0	7
MIMAT0000278	hsa-miR-221-3p	ENSG00000165480	SKA3	protein_coding	chr13	21729087	21729093	21729086	21729107	-	1	0	AGO1-4	1	0	0	0	1	0	0	3
MIMAT0000278	hsa-miR-221-3p	ENSG00000151835	SACS	protein_coding	chr13	23904231	23904236	23904231	23904236	-	6	0	AGO1-4,AGO2	1	0	0	0	0	0	0	10
MIMAT0000278	hsa-miR-221-3p	ENSG00000102699	PARP4	protein_coding	chr13	24995149	24995156	24995148	24995170	-	3	0	AGO2	1	0	0	0	1	0	0	6
MIMAT0000278	hsa-miR-221-3p	ENSG00000139505	MTMR6	protein_coding	chr13	25822967	25822973	25822966	25822987	-	7	0	AGO1,AGO1-4,AGO2	1	0	1	0	1	0	0	9
MIMAT0000278	hsa-miR-221-3p	ENSG00000139517	LNX2	protein_coding	chr13	28120279	28120284	28120279	28120284	-	1	0	AGO1-4	1	0	1	0	0	0	0	12
MIMAT0000278	hsa-miR-221-3p	ENSG00000133083	DCLK1	protein_coding	chr13	36345651	36345656	36345650	36345656	-	1	0	AGO1-4	1	0	1	0	0	0	1	10
MIMAT0000278	hsa-miR-221-3p	ENSG00000133104	SPART	protein_coding	chr13	36878262	36878267	36878261	36878289	-	6	0	AGO1-4,AGO2,AGO3	1	0	1	1	0	0	0	12
MIMAT0000278	hsa-miR-221-3p	ENSG00000165572	KBTBD6	protein_coding	chr13	41703180	41703185	41703180	41703185	-	3	0	AGO1-4,AGO2	1	0	0	0	0	0	0	17
MIMAT0000278	hsa-miR-221-3p	ENSG00000120658	ENOX1	protein_coding	chr13	43787793	43787798	43787792	43787813	-	2	0	AGO2	1	0	0	0	1	0	0	15
MIMAT0000278	hsa-miR-221-3p	ENSG00000136167	LCP1	protein_coding	chr13	46700167	46700172	46700167	46700172	-	4	0	AGO1-4	1	0	0	0	0	0	0	6
MIMAT0000278	hsa-miR-221-3p	ENSG00000136100	VPS36	protein_coding	chr13	52987782	52987787	52987782	52987787	-	7	0	AGO1-4,AGO2	1	0	0	0	0	0	0	9
MIMAT0000278	hsa-miR-221-3p	ENSG00000276644	DACH1	protein_coding	chr13	72013111	72013116	72013111	72013116	-	1	0	AGO2	1	0	0	0	0	0	0	16
MIMAT0000278	hsa-miR-221-3p	ENSG00000083520	DIS3	protein_coding	chr13	73330593	73330598	73330592	73330615	-	1	0	AGO2	1	0	0	0	1	0	0	8
MIMAT0000278	hsa-miR-221-3p	ENSG00000118922	KLF12	protein_coding	chr13	74265757	74265764	74265756	74265784	-	1	0	AGO2	1	0	0	1	0	0	0	11
MIMAT0000278	hsa-miR-221-3p	ENSG00000178695	KCTD12	protein_coding	chr13	77455206	77455211	77455206	77455211	-	1	0	AGO2	1	0	1	0	0	0	0	8
MIMAT0000278	hsa-miR-221-3p	ENSG00000139746	RBM26	protein_coding	chr13	79886190	79886195	79886189	79886217	-	3	0	AGO1-4,AGO2	0	0	1	1	0	0	0	8
MIMAT0000278	hsa-miR-221-3p	ENSG00000102572	STK24	protein_coding	chr13	99102641	99102647	99102640	99102668	-	1	0	AGO1-4	1	0	1	1	1	0	0	5
MIMAT0000278	hsa-miR-221-3p	ENSG00000125266	EFNB2	protein_coding	chr13	107145214	107145219	107145214	107145219	-	1	0	AGO2	1	0	0	0	0	0	0	6
MIMAT0000278	hsa-miR-221-3p	ENSG00000088448	ANKRD10	protein_coding	chr13	111531916	111531922	111531915	111531938	-	7	0	AGO1,AGO2	1	0	0	0	1	0	0	10
MIMAT0000278	hsa-miR-221-3p	ENSG00000121741	ZMYM2	protein_coding	chr13	20660261	20660266	20660239	20660267	+	13	0	AGO1-4,AGO2	1	0	0	1	1	1	1	18
MIMAT0000278	hsa-miR-221-3p	ENSG00000173141	MRPL57	protein_coding	chr13	21751438	21751443	21751438	21751443	+	5	0	AGO1-4	1	0	0	0	0	0	0	16
MIMAT0000278	hsa-miR-221-3p	ENSG00000127863	TNFRSF19	protein_coding	chr13	24249480	24249485	24249480	24249485	+	1	0	AGO2	1	0	0	0	0	0	0	12
MIMAT0000278	hsa-miR-221-3p	ENSG00000151846	PABPC3	protein_coding	chr13	25671427	25671433	25671406	25671434	+	25	5	AGO1,AGO1-4,AGO2,AGO3	0	0	1	1	0	0	0	9
MIMAT0000278	hsa-miR-221-3p	ENSG00000139496	NUP58	protein_coding	chr13	25909820	25909825	25909820	25909825	+	4	0	AGO1-4,AGO2	0	0	1	0	0	0	0	10
MIMAT0000278	hsa-miR-221-3p	ENSG00000132964	CDK8	protein_coding	chr13	26978514	26978519	26978497	26978520	+	2	0	AGO2	1	0	0	0	1	1	1	14
MIMAT0000278	hsa-miR-221-3p	ENSG00000132970	WASF3	protein_coding	chr13	27262167	27262172	27262167	27262172	+	2	0	AGO1-4,AGO2	1	0	0	0	0	0	0	16
MIMAT0000278	hsa-miR-221-3p	ENSG00000187676	B3GLCT	protein_coding	chr13	31905089	31905094	31905089	31905094	+	1	0	AGO2	1	0	0	0	0	0	0	5
MIMAT0000278	hsa-miR-221-3p	ENSG00000150893	FREM2	protein_coding	chr13	39456766	39456771	39456766	39456771	+	2	0	AGO1-4	1	0	0	0	0	0	0	15
MIMAT0000278	hsa-miR-221-3p	ENSG00000188811	NHLRC3	protein_coding	chr13	39623321	39623326	39623321	39623326	+	12	0	AGO1-4,AGO2	1	0	0	0	0	0	0	12
MIMAT0000278	hsa-miR-221-3p	ENSG00000102780	DGKH	protein_coding	chr13	42816807	42816813	42816792	42816814	+	4	1	AGO1-4,AGO2	0	0	0	0	1	0	1	6
MIMAT0000278	hsa-miR-221-3p	ENSG00000179630	LACC1	protein_coding	chr13	44467651	44467656	44467651	44467656	+	1	0	AGO2	0	0	1	0	0	0	0	5
MIMAT0000278	hsa-miR-221-3p	ENSG00000133114	GPALPP1	protein_coding	chr13	45604179	45604184	45604179	45604184	+	1	0	AGO1-4	0	0	1	0	0	0	0	14
MIMAT0000278	hsa-miR-221-3p	ENSG00000139687	RB1	protein_coding	chr13	49054445	49054450	49054445	49054450	+	4	0	AGO1-4,AGO2	1	0	1	0	0	0	0	7
MIMAT0000278	hsa-miR-221-3p	ENSG00000102531	FNDC3A	protein_coding	chr13	49720211	49720233	49720211	49720233	+	1	0	AGO1-4	0	0	0	0	1	0	0	12
MIMAT0000278	hsa-miR-221-3p	ENSG00000253797	UTP14C	protein_coding	chr13	52607068	52607073	52607068	52607073	+	8	0	AGO1,AGO1-4,AGO2,AGO3	1	0	0	0	0	0	0	15
MIMAT0000278	hsa-miR-221-3p	ENSG00000083535	PIBF1	protein_coding	chr13	73402024	73402047	73402024	73402047	+	1	0	AGO1-4	0	0	0	0	1	0	0	12
MIMAT0000278	hsa-miR-221-3p	ENSG00000102471	NDFIP2	protein_coding	chr13	80126913	80126918	80126913	80126919	+	1	0	AGO2	1	0	1	0	0	1	0	7
MIMAT0000278	hsa-miR-221-3p	ENSG00000165300	SLITRK5	protein_coding	chr13	88331242	88331247	88331226	88331248	+	3	0	AGO1-4,AGO2	1	0	1	0	1	1	1	8
MIMAT0000278	hsa-miR-221-3p	ENSG00000185352	HS6ST3	protein_coding	chr13	97489533	97489538	97489533	97489538	+	3	0	AGO2	1	0	0	0	0	0	0	16
MIMAT0000278	hsa-miR-221-3p	ENSG00000125249	RAP2A	protein_coding	chr13	98117269	98117274	98117269	98117274	+	3	0	AGO1-4,AGO2	1	0	1	0	0	0	0	9
MIMAT0000278	hsa-miR-221-3p	ENSG00000065150	IPO5	protein_coding	chr13	98674988	98674993	98674988	98674993	+	3	0	AGO1-4,AGO2	1	0	1	0	0	0	0	11
MIMAT0000278	hsa-miR-221-3p	ENSG00000102606	ARHGEF7	protein_coding	chr13	111945903	111945908	111945903	111945908	+	1	0	AGO2	1	0	1	0	0	0	0	12
MIMAT0000278	hsa-miR-221-3p	ENSG00000100888	CHD8	protein_coding	chr14	21853471	21853477	21853470	21853498	-	8	0	AGO1-4,AGO2	1	0	0	1	1	1	1	11
MIMAT0000278	hsa-miR-221-3p	ENSG00000100461	RBM23	protein_coding	chr14	23370377	23370382	23370376	23370403	-	1	0	AGO1-4	1	1	0	0	0	0	0	11
MIMAT0000278	hsa-miR-221-3p	ENSG00000215271	HOMEZ	protein_coding	chr14	23743796	23743801	23743796	23743801	-	1	0	AGO1-4	1	0	0	0	0	0	0	9
MIMAT0000278	hsa-miR-221-3p	ENSG00000139910	NOVA1	protein_coding	chr14	26915200	26915205	26915199	26915205	-	1	0	AGO2	1	0	0	0	0	1	0	13
MIMAT0000278	hsa-miR-221-3p	ENSG00000129480	DTD2	protein_coding	chr14	31916641	31916646	31916640	31916663	-	1	0	AGO1-4	1	0	0	0	1	0	0	11
MIMAT0000278	hsa-miR-221-3p	ENSG00000165389	SPTSSA	protein_coding	chr14	34903357	34903363	34903356	34903378	-	9	0	AGO1,AGO1-4,AGO2	1	0	0	0	1	0	1	9
MIMAT0000278	hsa-miR-221-3p	ENSG00000174373	RALGAPA1	protein_coding	chr14	36007723	36007728	36007722	36007750	-	3	1	AGO1-4,AGO2	1	0	1	1	1	1	1	17
MIMAT0000278	hsa-miR-221-3p	ENSG00000100934	SEC23A	protein_coding	chr14	39501397	39501402	39501396	39501418	-	24	0	AGO1,AGO1-4,AGO2	1	0	0	0	1	1	0	7
MIMAT0000278	hsa-miR-221-3p	ENSG00000182400	TRAPPC6B	protein_coding	chr14	39618104	39618109	39618104	39618109	-	1	0	AGO2	1	0	0	0	0	0	0	8
MIMAT0000278	hsa-miR-221-3p	ENSG00000179454	KLHL28	protein_coding	chr14	45393814	45393819	45393814	45393819	-	7	0	AGO1-4,AGO2	1	0	0	0	0	0	0	13
MIMAT0000278	hsa-miR-221-3p	ENSG00000100485	SOS2	protein_coding	chr14	50583967	50583972	50583967	50583972	-	1	0	AGO1-4	1	0	0	0	0	0	0	6
MIMAT0000278	hsa-miR-221-3p	ENSG00000012983	MAP4K5	protein_coding	chr14	50885835	50885842	50885834	50885856	-	3	0	AGO1-4,AGO2	1	0	0	0	1	0	0	5
MIMAT0000278	hsa-miR-221-3p	ENSG00000087301	TXNDC16	protein_coding	chr14	52897553	52897558	52897553	52897558	-	2	0	AGO1-4	1	0	0	0	0	0	0	17
MIMAT0000278	hsa-miR-221-3p	ENSG00000073712	FERMT2	protein_coding	chr14	53324298	53324303	53324297	53324325	-	10	0	AGO1-4,AGO2	1	0	1	1	1	1	0	10
MIMAT0000278	hsa-miR-221-3p	ENSG00000197045	GMFB	protein_coding	chr14	54942044	54942051	54942043	54942071	-	11	0	AGO1-4,AGO2	1	0	0	1	1	0	0	10
MIMAT0000278	hsa-miR-221-3p	ENSG00000139970	RTN1	protein_coding	chr14	60063135	60063140	60063135	60063140	-	1	0	AGO2	1	0	0	0	0	0	0	10
MIMAT0000278	hsa-miR-221-3p	ENSG00000154001	PPP2R5E	protein_coding	chr14	63841701	63841726	63841701	63841726	-	1	0	AGO1-4	0	0	0	0	1	0	0	4
MIMAT0000278	hsa-miR-221-3p	ENSG00000139998	RAB15	protein_coding	chr14	65413962	65413968	65413961	65413986	-	1	0	AGO1-4	1	0	1	0	1	0	0	12
MIMAT0000278	hsa-miR-221-3p	ENSG00000100568	VTI1B	protein_coding	chr14	68116354	68116359	68116354	68116359	-	3	0	AGO1-4	0	0	1	0	0	0	0	7
MIMAT0000278	hsa-miR-221-3p	ENSG00000213463	SYNJ2BP	protein_coding	chr14	70833430	70833435	70833430	70833435	-	1	0	AGO1-4	1	0	0	0	0	0	0	13
MIMAT0000278	hsa-miR-221-3p	ENSG00000006432	MAP3K9	protein_coding	chr14	71189826	71189831	71189826	71189831	-	2	0	AGO1-4	0	0	1	0	0	0	0	9
MIMAT0000278	hsa-miR-221-3p	ENSG00000119655	NPC2	protein_coding	chr14	74946838	74946843	74946838	74946843	-	3	0	AGO1-4	1	0	0	0	0	0	0	3
MIMAT0000278	hsa-miR-221-3p	ENSG00000119681	LTBP2	protein_coding	chr14	74967023	74967028	74967023	74967028	-	1	0	AGO1-4	1	0	0	0	0	0	0	5
MIMAT0000278	hsa-miR-221-3p	ENSG00000119682	AREL1	protein_coding	chr14	75129673	75129678	75129673	75129678	-	3	0	AGO1-4	1	0	1	0	0	0	0	8
MIMAT0000278	hsa-miR-221-3p	ENSG00000009830	POMT2	protein_coding	chr14	77741462	77741467	77741462	77741467	-	1	0	AGO2	1	0	0	0	0	0	0	13
MIMAT0000278	hsa-miR-221-3p	ENSG00000165417	GTF2A1	protein_coding	chr14	81646371	81646377	81646371	81646377	-	6	0	AGO1-4,AGO2	0	0	0	0	0	1	0	8
MIMAT0000278	hsa-miR-221-3p	ENSG00000119714	GPR68	protein_coding	chr14	91698911	91698917	91698910	91698936	-	1	2	AGO1-4	1	0	1	0	1	0	1	7
MIMAT0000278	hsa-miR-221-3p	ENSG00000165943	MOAP1	protein_coding	chr14	93648850	93648857	93648850	93648857	-	3	0	AGO1-4	1	0	0	0	0	0	0	18
MIMAT0000278	hsa-miR-221-3p	ENSG00000170270	GON7	protein_coding	chr14	93669302	93669307	93669302	93669307	-	1	0	AGO2	1	0	0	0	0	0	0	9
MIMAT0000278	hsa-miR-221-3p	ENSG00000100697	DICER1	protein_coding	chr14	95552599	95552604	95552599	95552604	-	2	0	AGO1-4	1	0	0	0	0	0	0	8
MIMAT0000278	hsa-miR-221-3p	ENSG00000176438	SYNE3	protein_coding	chr14	95874182	95874204	95874182	95874204	-	2	0	AGO1-4	0	0	0	0	1	0	0	8
MIMAT0000278	hsa-miR-221-3p	ENSG00000183092	BEGAIN	protein_coding	chr14	101003568	101003573	101003568	101003573	-	5	0	AGO1-4,AGO2	1	0	0	0	0	0	0	8
MIMAT0000278	hsa-miR-221-3p	ENSG00000166170	BAG5	protein_coding	chr14	104025243	104025250	104025242	104025267	-	4	0	AGO1-4,AGO2	1	0	0	0	1	0	0	3
MIMAT0000278	hsa-miR-221-3p	ENSG00000088808	PPP1R13B	protein_coding	chr14	104200237	104200242	104200237	104200242	-	3	0	AGO1-4	1	0	0	0	0	0	0	12
MIMAT0000278	hsa-miR-221-3p	ENSG00000198805	PNP	protein_coding	chr14	20944857	20944862	20944857	20944862	+	9	0	AGO1-4,AGO2	1	0	0	0	0	0	0	8
MIMAT0000278	hsa-miR-221-3p	ENSG00000157227	MMP14	protein_coding	chr14	23315511	23315516	23315511	23315516	+	8	0	AGO1-4,AGO2	1	0	0	0	0	0	0	3
MIMAT0000278	hsa-miR-221-3p	ENSG00000197324	LRP10	protein_coding	chr14	23346882	23346888	23346865	23346889	+	7	0	AGO1,AGO1-4,AGO2	1	0	0	0	1	0	0	5
MIMAT0000278	hsa-miR-221-3p	ENSG00000129473	BCL2L2	protein_coding	chr14	23780051	23780056	23780051	23780056	+	4	0	AGO1-4,AGO2	1	0	0	0	0	0	0	6
MIMAT0000278	hsa-miR-221-3p	ENSG00000100836	PABPN1	protein_coding	chr14	23795076	23795081	23795076	23795081	+	20	0	AGO1,AGO1-4,AGO2,AGO3	1	0	0	0	0	0	0	5
MIMAT0000278	hsa-miR-221-3p	ENSG00000092140	G2E3	protein_coding	chr14	31086440	31086447	31086425	31086448	+	4	0	AGO1-4,AGO2	1	0	0	0	1	0	0	11
MIMAT0000278	hsa-miR-221-3p	ENSG00000092208	GEMIN2	protein_coding	chr14	39605683	39605689	39605670	39605690	+	2	0	AGO1-4,AGO2	1	0	1	0	1	0	0	7
MIMAT0000278	hsa-miR-221-3p	ENSG00000139926	FRMD6	protein_coding	chr14	52195292	52195297	52195292	52195297	+	11	0	AGO1-4,AGO2	1	0	0	0	0	0	0	5
MIMAT0000278	hsa-miR-221-3p	ENSG00000198252	STYX	protein_coding	chr14	53238722	53238727	53238700	53238728	+	9	0	AGO1-4,AGO2	1	0	1	1	1	1	1	6
MIMAT0000278	hsa-miR-221-3p	ENSG00000180008	SOCS4	protein_coding	chr14	55512794	55512800	55512794	55512800	+	3	0	AGO1,AGO1-4	1	0	1	0	0	0	0	8
MIMAT0000278	hsa-miR-221-3p	ENSG00000168175	MAPK1IP1L	protein_coding	chr14	55532260	55532265	55532260	55532265	+	5	0	AGO1-4,AGO2	1	0	0	0	0	0	0	6
MIMAT0000278	hsa-miR-221-3p	ENSG00000100592	DAAM1	protein_coding	chr14	59758165	59758171	59758165	59758171	+	2	0	AGO1-4,AGO2	0	0	1	0	0	0	0	6
MIMAT0000278	hsa-miR-221-3p	ENSG00000027075	PRKCH	protein_coding	chr14	62017685	62017690	62017669	62017691	+	2	0	AGO1-4,AGO2	1	0	0	0	1	0	0	2
MIMAT0000278	hsa-miR-221-3p	ENSG00000023608	SNAPC1	protein_coding	chr14	62262447	62262452	62262431	62262453	+	2	0	AGO2	1	0	0	0	1	0	0	5
MIMAT0000278	hsa-miR-221-3p	ENSG00000179841	AKAP5	protein_coding	chr14	64939857	64939863	64939842	64939864	+	2	0	AGO2	1	0	0	0	1	0	1	11
MIMAT0000278	hsa-miR-221-3p	ENSG00000258289	CHURC1	protein_coding	chr14	65399157	65399162	65399155	65399162	+	2	0	AGO1-4	1	0	1	0	0	0	0	6
MIMAT0000278	hsa-miR-221-3p	ENSG00000072415	MPP5	protein_coding	chr14	67800997	67801002	67800997	67801002	+	5	0	AGO1-4,AGO2	1	0	0	0	0	0	0	5
MIMAT0000278	hsa-miR-221-3p	ENSG00000029364	SLC39A9	protein_coding	chr14	69926040	69926045	69926040	69926045	+	3	0	AGO1-4,AGO2	1	0	0	0	0	0	0	11
MIMAT0000278	hsa-miR-221-3p	ENSG00000198732	SMOC1	protein_coding	chr14	70499043	70499048	70499043	70499048	+	1	0	AGO2	1	0	0	0	0	0	0	8
MIMAT0000278	hsa-miR-221-3p	ENSG00000133985	TTC9	protein_coding	chr14	71140898	71140904	71140898	71140904	+	1	0	AGO1-4	1	0	1	0	0	0	0	3
MIMAT0000278	hsa-miR-221-3p	ENSG00000100731	PCNX1	protein_coding	chr14	71577835	71577840	71577835	71577840	+	2	0	AGO2	1	0	0	0	0	0	0	7
MIMAT0000278	hsa-miR-221-3p	ENSG00000182732	RGS6	protein_coding	chr14	73032924	73032929	73032908	73032930	+	1	0	AGO2	1	0	0	0	1	1	1	9
MIMAT0000278	hsa-miR-221-3p	ENSG00000119661	DNAL1	protein_coding	chr14	74168534	74168540	74168534	74168540	+	1	0	AGO1-4	0	0	0	0	0	1	1	19
MIMAT0000278	hsa-miR-221-3p	ENSG00000119616	FCF1	protein_coding	chr14	75201702	75201709	75201682	75201710	+	3	0	AGO1,AGO2	1	0	0	1	1	0	0	5
MIMAT0000278	hsa-miR-221-3p	ENSG00000119689	DLST	protein_coding	chr14	75369784	75369789	75369784	75369789	+	2	0	AGO1-4,AGO2	1	0	0	0	0	0	0	10
MIMAT0000278	hsa-miR-221-3p	ENSG00000119703	ZC2HC1C	protein_coding	chr14	75544398	75544405	75544398	75544405	+	1	0	AGO1-4	1	0	0	0	0	0	0	11
MIMAT0000278	hsa-miR-221-3p	ENSG00000170345	FOS	protein_coding	chr14	75748331	75748336	75748309	75748337	+	6	0	AGO1-4,AGO2	1	0	1	1	1	1	1	5
MIMAT0000278	hsa-miR-221-3p	ENSG00000089916	GPATCH2L	protein_coding	chr14	76680180	76680208	76680180	76680208	+	1	0	AGO1	0	0	0	1	0	0	0	11
MIMAT0000278	hsa-miR-221-3p	ENSG00000071246	VASH1	protein_coding	chr14	77245900	77245905	77245900	77245905	+	1	0	AGO2	1	0	1	0	0	0	0	9
MIMAT0000278	hsa-miR-221-3p	ENSG00000021645	NRXN3	protein_coding	chr14	80329527	80329532	80329527	80329532	+	1	0	AGO1-4	1	0	0	0	0	0	0	13
MIMAT0000278	hsa-miR-221-3p	ENSG00000185070	FLRT2	protein_coding	chr14	86090612	86090617	86090612	86090617	+	3	0	AGO1-4,AGO2	1	0	0	0	0	0	0	6
MIMAT0000278	hsa-miR-221-3p	ENSG00000165533	TTC8	protein_coding	chr14	89344115	89344121	89344094	89344122	+	4	0	AGO1,AGO1-4,AGO2	1	0	1	1	1	0	0	15
MIMAT0000278	hsa-miR-221-3p	ENSG00000198668	CALM1	protein_coding	chr14	90872944	90872949	90872922	90872950	+	6	0	AGO1-4,AGO2	1	0	1	1	0	0	0	8
MIMAT0000278	hsa-miR-221-3p	ENSG00000089723	OTUB2	protein_coding	chr14	94512362	94512367	94512362	94512367	+	1	0	AGO1-4	1	0	0	0	0	0	0	7
MIMAT0000278	hsa-miR-221-3p	ENSG00000182512	GLRX5	protein_coding	chr14	96010837	96010842	96010837	96010842	+	9	0	AGO1,AGO1-4,AGO2,AGO3	1	0	0	0	0	0	0	8
MIMAT0000278	hsa-miR-221-3p	ENSG00000090060	PAPOLA	protein_coding	chr14	97033110	97033115	97033110	97033115	+	2	0	AGO2	1	0	0	0	0	0	0	11
MIMAT0000278	hsa-miR-221-3p	ENSG00000196663	TECPR2	protein_coding	chr14	102966427	102966432	102966427	102966432	+	11	0	AGO1-4,AGO2	1	0	1	0	0	0	0	7
MIMAT0000278	hsa-miR-221-3p	ENSG00000089902	RCOR1	protein_coding	chr14	103193526	103193531	103193526	103193531	+	5	0	AGO1-4,AGO2	1	0	0	0	0	0	0	6
MIMAT0000278	hsa-miR-221-3p	ENSG00000185215	TNFAIP2	protein_coding	chr14	103603086	103603091	103603086	103603091	+	1	0	AGO1-4	1	0	0	0	0	0	0	7
MIMAT0000278	hsa-miR-221-3p	ENSG00000100664	EIF5	protein_coding	chr14	103809587	103809592	103809587	103809592	+	1	0	AGO1-4	1	0	1	0	0	0	0	7
MIMAT0000278	hsa-miR-221-3p	ENSG00000126214	KLC1	protein_coding	chr14	104151599	104151604	104151577	104151605	+	4	0	AGO1-4,AGO2	0	0	1	1	0	0	0	3
MIMAT0000278	hsa-miR-221-3p	ENSG00000256500	AL139300.1	protein_coding	chr14	104152169	104152174	104152147	104152175	+	4	0	AGO1-4,AGO2	1	0	1	1	1	1	0	4
MIMAT0000278	hsa-miR-221-3p	ENSG00000185347	TEDC1	protein_coding	chr14	105965549	105965554	105965549	105965554	+	1	0	AGO1-4	1	0	0	0	0	0	0	7
MIMAT0000278	hsa-miR-221-3p	ENSG00000170113	NIPA1	protein_coding	chr15	23046635	23046657	23046635	23046657	-	1	0	AGO2	0	0	0	0	1	0	0	9
MIMAT0000278	hsa-miR-221-3p	ENSG00000128731	HERC2	protein_coding	chr15	28356327	28356332	28356327	28356332	-	3	0	AGO1-4,AGO2	1	0	0	0	0	0	0	7
MIMAT0000278	hsa-miR-221-3p	ENSG00000185115	NSMCE3	protein_coding	chr15	29560872	29560877	29560872	29560877	-	6	0	AGO1,AGO1-4,AGO2,AGO3	1	0	0	0	0	0	0	10
MIMAT0000278	hsa-miR-221-3p	ENSG00000134152	KATNBL1	protein_coding	chr15	34433098	34433103	34433097	34433125	-	2	0	AGO2	1	0	0	1	0	0	0	8
MIMAT0000278	hsa-miR-221-3p	ENSG00000134146	DPH6	protein_coding	chr15	35663220	35663226	35663219	35663242	-	3	0	AGO1-4	1	0	1	0	1	0	0	8
MIMAT0000278	hsa-miR-221-3p	ENSG00000172575	RASGRP1	protein_coding	chr15	38782098	38782103	38782098	38782103	-	2	0	AGO1-4	1	0	0	0	0	0	0	4
MIMAT0000278	hsa-miR-221-3p	ENSG00000104081	BMF	protein_coding	chr15	40380298	40380303	40380297	40380318	-	7	2	AGO2	1	0	0	0	1	1	1	16
MIMAT0000278	hsa-miR-221-3p	ENSG00000103978	TMEM87A	protein_coding	chr15	42503004	42503009	42503004	42503009	-	6	0	AGO1-4,AGO2	1	0	0	0	0	0	0	7
MIMAT0000278	hsa-miR-221-3p	ENSG00000128881	TTBK2	protein_coding	chr15	43036369	43036376	43036369	43036376	-	1	0	AGO1-4	0	0	0	0	0	0	1	11
MIMAT0000278	hsa-miR-221-3p	ENSG00000159459	UBR1	protein_coding	chr15	43309330	43309335	43309330	43309335	-	1	0	AGO2	0	0	1	0	0	0	0	9
MIMAT0000278	hsa-miR-221-3p	ENSG00000128886	ELL3	protein_coding	chr15	44064901	44064906	44064901	44064906	-	2	0	AGO1-4	1	0	0	0	0	0	0	9
MIMAT0000278	hsa-miR-221-3p	ENSG00000262560	AC018512.1	protein_coding	chr15	44064901	44064906	44064901	44064906	-	2	0	AGO1-4	1	0	0	0	0	0	0	1
MIMAT0000278	hsa-miR-221-3p	ENSG00000104177	MYEF2	protein_coding	chr15	48434480	48434486	48434479	48434507	-	2	0	AGO2	1	0	1	1	1	0	1	18
MIMAT0000278	hsa-miR-221-3p	ENSG00000166147	FBN1	protein_coding	chr15	48702975	48702980	48702975	48702980	-	5	0	AGO1-4,AGO2	1	0	0	0	0	0	0	8
MIMAT0000278	hsa-miR-221-3p	ENSG00000138593	SECISBP2L	protein_coding	chr15	49284286	49284291	49284285	49284313	-	10	0	AGO1-4,AGO2	1	0	1	1	0	0	0	11
MIMAT0000278	hsa-miR-221-3p	ENSG00000140280	LYSMD2	protein_coding	chr15	52015584	52015589	52015584	52015589	-	6	0	AGO1-4,AGO2	1	0	0	0	0	0	0	4
MIMAT0000278	hsa-miR-221-3p	ENSG00000069966	GNB5	protein_coding	chr15	52414853	52414860	52414853	52414860	-	1	0	AGO1-4	1	0	0	0	0	0	0	14
MIMAT0000278	hsa-miR-221-3p	ENSG00000197535	MYO5A	protein_coding	chr15	52603827	52603832	52603827	52603832	-	2	0	AGO1-4	1	0	1	0	0	0	0	6
MIMAT0000278	hsa-miR-221-3p	ENSG00000128989	ARPP19	protein_coding	chr15	52841184	52841189	52841184	52841189	-	6	0	AGO1,AGO1-4,AGO2	1	0	0	0	0	0	0	9
MIMAT0000278	hsa-miR-221-3p	ENSG00000047346	FAM214A	protein_coding	chr15	52874010	52874015	52874009	52874037	-	4	0	AGO1-4,AGO2	1	0	1	1	1	1	1	14
MIMAT0000278	hsa-miR-221-3p	ENSG00000069974	RAB27A	protein_coding	chr15	55496568	55496573	55496567	55496589	-	1	0	AGO1-4	1	0	0	0	1	0	0	3
MIMAT0000278	hsa-miR-221-3p	ENSG00000069869	NEDD4	protein_coding	chr15	56140582	56140610	56140582	56140610	-	10	2	AGO1-4,AGO2	0	0	0	1	0	0	0	9
MIMAT0000278	hsa-miR-221-3p	ENSG00000181827	RFX7	protein_coding	chr15	56383415	56383420	56383414	56383442	-	2	0	AGO1-4,AGO2	1	0	1	1	1	1	1	7
MIMAT0000278	hsa-miR-221-3p	ENSG00000137871	ZNF280D	protein_coding	chr15	56922885	56922890	56922885	56922890	-	1	0	AGO1-4	1	0	0	0	0	0	0	16
MIMAT0000278	hsa-miR-221-3p	ENSG00000128918	ALDH1A2	protein_coding	chr15	58245765	58245770	58245765	58245770	-	2	0	AGO2	1	0	0	0	0	0	0	13
MIMAT0000278	hsa-miR-221-3p	ENSG00000137845	ADAM10	protein_coding	chr15	58888805	58888810	58888804	58888826	-	6	0	AGO1,AGO1-4,AGO2	1	0	0	0	1	0	0	8
MIMAT0000278	hsa-miR-221-3p	ENSG00000137776	SLTM	protein_coding	chr15	59171563	59171570	59171563	59171570	-	2	0	AGO1-4,AGO2	1	0	0	0	0	0	0	14
MIMAT0000278	hsa-miR-221-3p	ENSG00000140307	GTF2A2	protein_coding	chr15	59931175	59931180	59931175	59931180	-	12	0	AGO1,AGO1-4,AGO2	1	0	0	0	0	0	0	7
MIMAT0000278	hsa-miR-221-3p	ENSG00000129003	VPS13C	protein_coding	chr15	62145665	62145672	62145664	62145692	-	1	0	AGO2	1	0	0	1	1	0	0	8
MIMAT0000278	hsa-miR-221-3p	ENSG00000074410	CA12	protein_coding	chr15	63618382	63618387	63618382	63618387	-	8	0	AGO1-4,AGO2	1	0	0	0	0	0	0	6
MIMAT0000278	hsa-miR-221-3p	ENSG00000169118	CSNK1G1	protein_coding	chr15	64462738	64462743	64462738	64462743	-	1	0	AGO1-4	1	0	0	0	0	0	0	10
MIMAT0000278	hsa-miR-221-3p	ENSG00000166831	RBPMS2	protein_coding	chr15	65032889	65032894	65032889	65032894	-	1	0	AGO2	1	0	0	0	0	0	0	15
MIMAT0000278	hsa-miR-221-3p	ENSG00000090470	PDCD7	protein_coding	chr15	65410259	65410266	65410259	65410266	-	2	0	AGO1-4	1	0	0	0	0	0	0	6
MIMAT0000278	hsa-miR-221-3p	ENSG00000174498	IGDCC3	protein_coding	chr15	65620870	65620875	65620870	65620875	-	2	0	AGO1-4	1	0	0	0	0	0	0	12
MIMAT0000278	hsa-miR-221-3p	ENSG00000074603	DPP8	protein_coding	chr15	65738511	65738517	65738510	65738538	-	4	0	AGO1-4,AGO2	1	0	0	1	1	0	1	10
MIMAT0000278	hsa-miR-221-3p	ENSG00000140332	TLE3	protein_coding	chr15	70340904	70340909	70340903	70340924	-	11	0	AGO1,AGO1-4,AGO2	1	0	0	0	1	1	1	7
MIMAT0000278	hsa-miR-221-3p	ENSG00000140474	ULK3	protein_coding	chr15	75128566	75128571	75128566	75128571	-	2	0	AGO1-4	1	0	0	0	0	0	0	12
MIMAT0000278	hsa-miR-221-3p	ENSG00000178761	FAM219B	protein_coding	chr15	75192904	75192911	75192903	75192925	-	1	0	AGO2	1	0	0	0	1	0	0	15
MIMAT0000278	hsa-miR-221-3p	ENSG00000140395	WDR61	protein_coding	chr15	78575669	78575674	78575668	78575690	-	12	0	AGO1,AGO1-4,AGO2,AGO3	1	0	1	0	1	0	0	14
MIMAT0000278	hsa-miR-221-3p	ENSG00000117899	MESD	protein_coding	chr15	81271072	81271077	81271072	81271077	-	15	0	AGO1,AGO1-4,AGO2	1	0	0	0	0	0	0	4
MIMAT0000278	hsa-miR-221-3p	ENSG00000183496	MEX3B	protein_coding	chr15	82334759	82334764	82334759	82334764	-	3	0	AGO1-4,AGO2	1	0	1	0	0	0	0	17
MIMAT0000278	hsa-miR-221-3p	ENSG00000242498	ARPIN	protein_coding	chr15	90444402	90444407	90444402	90444407	-	1	0	AGO2	1	0	1	0	0	0	0	10
MIMAT0000278	hsa-miR-221-3p	ENSG00000198901	PRC1	protein_coding	chr15	91509929	91509934	91509929	91509934	-	5	0	AGO1-4,AGO2	1	0	0	0	0	0	0	5
MIMAT0000278	hsa-miR-221-3p	ENSG00000284946	AC068831.7	protein_coding	chr15	91509929	91509934	91509929	91509934	-	5	0	AGO1-4,AGO2	1	0	0	0	0	0	0	0
MIMAT0000278	hsa-miR-221-3p	ENSG00000131873	CHSY1	protein_coding	chr15	101717387	101717392	101717386	101717408	-	17	0	AGO1-4,AGO2	1	0	1	0	1	1	1	7
MIMAT0000278	hsa-miR-221-3p	ENSG00000128739	SNRPN	protein_coding	chr15	25222951	25222956	25222951	25222957	+	1	0	AGO1-4	1	0	0	0	0	1	0	11
MIMAT0000278	hsa-miR-221-3p	ENSG00000214265	AC124312.1	protein_coding	chr15	25222951	25222956	25222951	25222957	+	1	0	AGO1-4	1	0	0	0	0	1	0	4
MIMAT0000278	hsa-miR-221-3p	ENSG00000273173	SNURF	protein_coding	chr15	25222951	25222956	25222951	25222957	+	1	0	AGO1-4	1	0	0	0	0	1	0	11
MIMAT0000278	hsa-miR-221-3p	ENSG00000198826	ARHGAP11A	protein_coding	chr15	32930126	32930131	32930126	32930131	+	7	0	AGO1-4,AGO2	1	0	0	0	0	0	0	6
MIMAT0000278	hsa-miR-221-3p	ENSG00000137801	THBS1	protein_coding	chr15	39888358	39888362	39888341	39888378	+	28	0	AGO1-4,AGO2	1	0	1	0	2	0	1	8
MIMAT0000278	hsa-miR-221-3p	ENSG00000140323	DISP2	protein_coding	chr15	40662821	40662826	40662821	40662826	+	1	0	AGO1-4	1	0	0	0	0	0	0	7
MIMAT0000278	hsa-miR-221-3p	ENSG00000140320	BAHD1	protein_coding	chr15	40758703	40758708	40758703	40758708	+	3	0	AGO1-4,AGO2	1	0	0	0	0	0	0	9
MIMAT0000278	hsa-miR-221-3p	ENSG00000051180	RAD51	protein_coding	chr15	41020926	41020948	41020926	41020948	+	3	0	AGO1,AGO1-4,AGO2	0	0	0	0	1	0	0	3
MIMAT0000278	hsa-miR-221-3p	ENSG00000285396	AC012476.1	protein_coding	chr15	41020926	41020948	41020926	41020948	+	3	0	AGO1,AGO1-4,AGO2	0	0	0	0	1	0	0	0
MIMAT0000278	hsa-miR-221-3p	ENSG00000137815	RTF1	protein_coding	chr15	41773659	41773664	41773659	41773664	+	1	0	AGO2	1	0	0	0	0	0	0	9
MIMAT0000278	hsa-miR-221-3p	ENSG00000174197	MGA	protein_coding	chr15	42059860	42059865	42059860	42059865	+	1	0	AGO2	1	0	1	0	0	0	0	13
MIMAT0000278	hsa-miR-221-3p	ENSG00000092531	SNAP23	protein_coding	chr15	42824966	42824972	42824945	42824973	+	10	0	AGO1-4,AGO2	1	0	1	1	1	0	0	6
MIMAT0000278	hsa-miR-221-3p	ENSG00000166734	CASC4	protein_coding	chr15	44707644	44707649	44707644	44707649	+	4	0	AGO2	1	0	0	0	0	0	0	10
MIMAT0000278	hsa-miR-221-3p	ENSG00000137770	CTDSPL2	protein_coding	chr15	44816760	44816765	44816760	44816765	+	15	0	AGO1-4,AGO2	1	0	1	0	0	0	0	9
MIMAT0000278	hsa-miR-221-3p	ENSG00000104131	EIF3J	protein_coding	chr15	44853400	44853405	44853378	44853406	+	6	2	AGO1,AGO1-4,AGO2	1	0	0	1	1	1	1	11
MIMAT0000278	hsa-miR-221-3p	ENSG00000140263	SORD	protein_coding	chr15	45365923	45365928	45365923	45365928	+	1	0	AGO2	1	0	0	0	0	0	0	12
MIMAT0000278	hsa-miR-221-3p	ENSG00000137872	SEMA6D	protein_coding	chr15	48064121	48064148	48064121	48064148	+	1	0	AGO2	0	0	0	0	1	0	0	12
MIMAT0000278	hsa-miR-221-3p	ENSG00000128872	TMOD2	protein_coding	chr15	52101294	52101300	52101293	52101300	+	3	0	AGO2	1	0	1	0	0	0	0	9
MIMAT0000278	hsa-miR-221-3p	ENSG00000140262	TCF12	protein_coding	chr15	57579889	57579895	57579868	57579896	+	10	1	AGO1-4,AGO2	1	0	1	1	1	0	0	11
MIMAT0000278	hsa-miR-221-3p	ENSG00000128923	MINDY2	protein_coding	chr15	59147060	59147065	59147060	59147065	+	9	0	AGO1-4,AGO2	1	0	0	0	0	0	0	7
MIMAT0000278	hsa-miR-221-3p	ENSG00000157470	FAM81A	protein_coding	chr15	59813640	59813645	59813640	59813645	+	1	0	AGO1-4	1	0	0	0	0	0	0	7
MIMAT0000278	hsa-miR-221-3p	ENSG00000198535	C2CD4A	protein_coding	chr15	62363075	62363081	62363054	62363082	+	1	0	AGO2	1	0	1	1	1	0	0	9
MIMAT0000278	hsa-miR-221-3p	ENSG00000140463	BBS4	protein_coding	chr15	73030199	73030205	73030184	73030206	+	1	0	AGO1-4	1	0	0	0	1	0	0	17
MIMAT0000278	hsa-miR-221-3p	ENSG00000167196	FBXO22	protein_coding	chr15	76225532	76225560	76225532	76225560	+	1	0	AGO2	0	0	0	1	0	0	0	7
MIMAT0000278	hsa-miR-221-3p	ENSG00000041357	PSMA4	protein_coding	chr15	78841552	78841557	78841552	78841557	+	2	0	AGO1-4,AGO2	1	0	0	0	0	0	0	4
MIMAT0000278	hsa-miR-221-3p	ENSG00000185787	MORF4L1	protein_coding	chr15	79189996	79190001	79189980	79190002	+	24	0	AGO1,AGO1-4,AGO2	1	0	0	0	1	0	0	8
MIMAT0000278	hsa-miR-221-3p	ENSG00000140406	TLNRD1	protein_coding	chr15	81296106	81296111	81296084	81296112	+	10	0	AGO1,AGO1-4,AGO2	1	0	1	1	1	1	1	5
MIMAT0000278	hsa-miR-221-3p	ENSG00000073417	PDE8A	protein_coding	chr15	85681333	85681338	85681333	85681338	+	2	0	AGO1-4,AGO2	1	0	0	0	0	0	0	8
MIMAT0000278	hsa-miR-221-3p	ENSG00000170776	AKAP13	protein_coding	chr15	86289498	86289503	86289476	86289504	+	10	0	AGO1-4,AGO2	1	0	1	1	0	0	0	6
MIMAT0000278	hsa-miR-221-3p	ENSG00000140526	ABHD2	protein_coding	chr15	89741535	89741540	89741535	89741540	+	4	0	AGO1-4,AGO2	1	0	1	0	0	0	0	8
MIMAT0000278	hsa-miR-221-3p	ENSG00000182768	NGRN	protein_coding	chr15	90815433	90815439	90815412	90815440	+	8	0	AGO1,AGO1-4,AGO2	1	0	1	1	1	0	1	9
MIMAT0000278	hsa-miR-221-3p	ENSG00000261147	AC091167.2	protein_coding	chr15	90815433	90815439	90815412	90815440	+	8	0	AGO1,AGO1-4,AGO2	1	0	1	1	1	0	1	3
MIMAT0000278	hsa-miR-221-3p	ENSG00000140575	IQGAP1	protein_coding	chr15	91045304	91045309	91045304	91045309	+	7	0	AGO1-4,AGO2	1	0	0	0	0	0	0	5
MIMAT0000278	hsa-miR-221-3p	ENSG00000140577	CRTC3	protein_coding	chr15	91186491	91186496	91186491	91186496	+	3	0	AGO1-4,AGO2	1	0	0	0	0	0	0	13
MIMAT0000278	hsa-miR-221-3p	ENSG00000185518	SV2B	protein_coding	chr15	91844183	91844189	91844183	91844189	+	1	0	AGO1-4	0	0	1	0	0	0	0	8
MIMAT0000278	hsa-miR-221-3p	ENSG00000140450	ARRDC4	protein_coding	chr15	98516726	98516733	98516711	98516734	+	5	0	AGO1-4,AGO2	1	0	0	0	1	0	0	8
MIMAT0000278	hsa-miR-221-3p	ENSG00000140443	IGF1R	protein_coding	chr15	99506680	99506687	99506680	99506687	+	2	0	AGO1-4,AGO2	1	0	0	0	0	0	0	7
MIMAT0000278	hsa-miR-221-3p	ENSG00000182253	SYNM	protein_coding	chr15	99674637	99674644	99674637	99674644	+	3	0	AGO2	1	0	0	0	0	0	0	9
MIMAT0000278	hsa-miR-221-3p	ENSG00000183475	ASB7	protein_coding	chr15	101189200	101189205	101189184	101189206	+	3	0	AGO2	1	0	1	0	1	1	0	9
MIMAT0000278	hsa-miR-221-3p	ENSG00000059145	UNKL	protein_coding	chr16	1413326	1413331	1413326	1413331	-	6	0	AGO1-4,AGO2	1	0	0	0	0	0	0	12
MIMAT0000278	hsa-miR-221-3p	ENSG00000205937	RNPS1	protein_coding	chr16	2303201	2303206	2303200	2303222	-	15	6	AGO1,AGO1-4,AGO2,AGO3	1	0	0	0	1	1	1	6
MIMAT0000278	hsa-miR-221-3p	ENSG00000162104	ADCY9	protein_coding	chr16	4013715	4013720	4013715	4013720	-	4	0	AGO1-4,AGO2	1	0	0	0	0	0	0	11
MIMAT0000278	hsa-miR-221-3p	ENSG00000185338	SOCS1	protein_coding	chr16	11348468	11348473	11348467	11348473	-	17	0	AGO1-4,AGO2	1	0	0	0	0	1	1	2
MIMAT0000278	hsa-miR-221-3p	ENSG00000166783	MARF1	protein_coding	chr16	15690162	15690167	15690161	15690189	-	5	0	AGO1-4,AGO2	1	0	0	1	1	1	1	10
MIMAT0000278	hsa-miR-221-3p	ENSG00000170540	ARL6IP1	protein_coding	chr16	18803196	18803201	18803196	18803201	-	27	0	AGO1,AGO1-4,AGO2	1	0	0	0	0	0	0	13
MIMAT0000278	hsa-miR-221-3p	ENSG00000066654	THUMPD1	protein_coding	chr16	20747041	20747046	20747041	20747046	-	1	0	AGO1-4	1	0	0	0	0	0	0	12
MIMAT0000278	hsa-miR-221-3p	ENSG00000196678	ERI2	protein_coding	chr16	20808585	20808608	20808585	20808608	-	1	0	AGO2	0	0	0	0	1	0	0	12
MIMAT0000278	hsa-miR-221-3p	ENSG00000103404	USP31	protein_coding	chr16	23076076	23076081	23076076	23076081	-	1	0	AGO1-4	1	0	0	0	0	0	0	5
MIMAT0000278	hsa-miR-221-3p	ENSG00000103365	GGA2	protein_coding	chr16	23476970	23476975	23476970	23476975	-	1	0	AGO1-4	1	0	1	0	0	0	0	6
MIMAT0000278	hsa-miR-221-3p	ENSG00000090238	YPEL3	protein_coding	chr16	30103668	30103673	30103668	30103673	-	2	0	AGO1-4	1	0	0	0	0	0	0	5
MIMAT0000278	hsa-miR-221-3p	ENSG00000102870	ZNF629	protein_coding	chr16	30790526	30790531	30790526	30790531	-	1	0	AGO1	1	0	1	0	0	0	0	11
MIMAT0000278	hsa-miR-221-3p	ENSG00000102921	N4BP1	protein_coding	chr16	48574669	48574674	48574669	48574674	-	1	0	AGO2	1	0	0	0	0	0	0	4
MIMAT0000278	hsa-miR-221-3p	ENSG00000166971	AKTIP	protein_coding	chr16	53525851	53525856	53525851	53525856	-	6	0	AGO1-4,AGO2	1	0	0	0	0	0	0	8
MIMAT0000278	hsa-miR-221-3p	ENSG00000167005	NUDT21	protein_coding	chr16	56463601	56463606	56463601	56463606	-	3	0	AGO1-4,AGO2	1	0	1	0	0	0	0	6
MIMAT0000278	hsa-miR-221-3p	ENSG00000005194	CIAPIN1	protein_coding	chr16	57462529	57462534	57462529	57462534	-	3	0	AGO1-4,AGO2	1	0	0	0	0	0	0	11
MIMAT0000278	hsa-miR-221-3p	ENSG00000125107	CNOT1	protein_coding	chr16	58553879	58553884	58553879	58553884	-	2	0	AGO1-4,AGO2	1	0	1	0	0	0	0	3
MIMAT0000278	hsa-miR-221-3p	ENSG00000183723	CMTM4	protein_coding	chr16	66649231	66649236	66649231	66649236	-	4	0	AGO1-4,AGO2	1	0	1	0	0	0	0	13
MIMAT0000278	hsa-miR-221-3p	ENSG00000135720	DYNC1LI2	protein_coding	chr16	66756436	66756442	66756435	66756457	-	16	0	AGO1,AGO1-4,AGO2	1	0	0	0	1	0	1	9
MIMAT0000278	hsa-miR-221-3p	ENSG00000141084	RANBP10	protein_coding	chr16	67760081	67760087	67760081	67760087	-	1	0	AGO2	1	0	0	0	0	0	1	10
MIMAT0000278	hsa-miR-221-3p	ENSG00000103061	SLC7A6OS	protein_coding	chr16	68334717	68334722	68334717	68334722	-	1	0	AGO2	1	0	0	0	0	0	0	5
MIMAT0000278	hsa-miR-221-3p	ENSG00000132604	TERF2	protein_coding	chr16	69389498	69389504	69389498	69389504	-	5	0	AGO1,AGO1-4,AGO2,AGO3	0	0	0	0	0	0	1	8
MIMAT0000278	hsa-miR-221-3p	ENSG00000223496	EXOSC6	protein_coding	chr16	70284171	70284176	70284171	70284176	-	9	0	AGO1-4,AGO2	1	0	0	0	0	0	0	5
MIMAT0000278	hsa-miR-221-3p	ENSG00000166747	AP1G1	protein_coding	chr16	71764877	71764882	71764877	71764882	-	5	0	AGO1-4,AGO2	1	0	0	0	0	0	0	9
MIMAT0000278	hsa-miR-221-3p	ENSG00000140836	ZFHX3	protein_coding	chr16	72818627	72818632	72818626	72818632	-	21	0	AGO1-4,AGO2	1	0	1	0	0	1	1	8
MIMAT0000278	hsa-miR-221-3p	ENSG00000065427	KARS	protein_coding	chr16	75661838	75661866	75661838	75661866	-	15	5	AGO1-4,AGO2	0	0	0	1	0	0	0	5
MIMAT0000278	hsa-miR-221-3p	ENSG00000131148	EMC8	protein_coding	chr16	85813226	85813231	85813226	85813231	-	5	0	AGO1-4,AGO2	1	0	0	0	0	0	0	7
MIMAT0000278	hsa-miR-221-3p	ENSG00000140948	ZCCHC14	protein_coding	chr16	87443209	87443214	87443209	87443214	-	11	0	AGO1-4,AGO2	1	0	0	0	0	0	0	11
MIMAT0000278	hsa-miR-221-3p	ENSG00000141012	GALNS	protein_coding	chr16	88880210	88880215	88880210	88880215	-	1	0	AGO2	1	0	0	0	0	0	0	5
MIMAT0000278	hsa-miR-221-3p	ENSG00000187741	FANCA	protein_coding	chr16	89865182	89865187	89865182	89865187	-	1	0	AGO2	1	0	0	0	0	0	0	6
MIMAT0000278	hsa-miR-221-3p	ENSG00000140983	RHOT2	protein_coding	chr16	724072	724077	724072	724077	+	2	0	AGO1-4,AGO2	1	0	0	0	0	0	0	12
MIMAT0000278	hsa-miR-221-3p	ENSG00000100726	TELO2	protein_coding	chr16	1560021	1560026	1560021	1560026	+	3	0	AGO1-4,AGO2	1	0	0	0	0	0	0	6
MIMAT0000278	hsa-miR-221-3p	ENSG00000007545	CRAMP1	protein_coding	chr16	1726842	1726847	1726842	1726847	+	1	0	AGO1-4	1	0	0	0	0	0	0	9
MIMAT0000278	hsa-miR-221-3p	ENSG00000127561	SYNGR3	protein_coding	chr16	2044112	2044117	2044112	2044117	+	2	0	AGO1-4,AGO2	1	0	0	0	0	0	0	6
MIMAT0000278	hsa-miR-221-3p	ENSG00000162065	TBC1D24	protein_coding	chr16	2552537	2552543	2552537	2552543	+	2	0	AGO1-4	1	0	0	0	0	0	0	10
MIMAT0000278	hsa-miR-221-3p	ENSG00000140992	PDPK1	protein_coding	chr16	2652748	2652753	2652748	2652753	+	6	0	AGO1-4,AGO2	1	0	0	0	0	0	0	11
MIMAT0000278	hsa-miR-221-3p	ENSG00000162086	ZNF75A	protein_coding	chr16	3368512	3368517	3368512	3368517	+	4	0	AGO1-4,AGO2	1	0	0	0	0	0	0	9
MIMAT0000278	hsa-miR-221-3p	ENSG00000122390	NAA60	protein_coding	chr16	3536907	3536912	3536907	3536912	+	7	0	AGO1-4,AGO2	1	0	0	0	0	0	0	10
MIMAT0000278	hsa-miR-221-3p	ENSG00000183044	ABAT	protein_coding	chr16	8876078	8876083	8876078	8876083	+	3	0	AGO1-4	1	0	0	0	0	0	0	14
MIMAT0000278	hsa-miR-221-3p	ENSG00000182831	C16orf72	protein_coding	chr16	9211951	9211956	9211951	9211956	+	5	0	AGO1-4,AGO2	1	0	0	0	0	0	0	8
MIMAT0000278	hsa-miR-221-3p	ENSG00000166669	ATF7IP2	protein_coding	chr16	10524660	10524682	10524660	10524682	+	1	0	AGO1-4	0	0	0	0	1	0	0	7
MIMAT0000278	hsa-miR-221-3p	ENSG00000184602	SNN	protein_coding	chr16	11770428	11770433	11770428	11770433	+	11	0	AGO1-4,AGO2	1	0	0	0	0	0	0	7
MIMAT0000278	hsa-miR-221-3p	ENSG00000048471	SNX29	protein_coding	chr16	12666907	12666912	12666907	12666913	+	1	0	AGO1	1	0	1	0	0	0	1	11
MIMAT0000278	hsa-miR-221-3p	ENSG00000175595	ERCC4	protein_coding	chr16	14042938	14042958	14042938	14042958	+	5	0	AGO1,AGO1-4,AGO2	0	0	0	0	1	0	0	12
MIMAT0000278	hsa-miR-221-3p	ENSG00000186260	MKL2	protein_coding	chr16	14360555	14360560	14360555	14360560	+	6	0	AGO1-4,AGO2	1	0	0	0	0	0	0	10
MIMAT0000278	hsa-miR-221-3p	ENSG00000166780	C16orf45	protein_coding	chr16	15680860	15680865	15680858	15680866	+	1	0	AGO2	1	0	0	0	0	0	1	12
MIMAT0000278	hsa-miR-221-3p	ENSG00000103540	CCP110	protein_coding	chr16	19563091	19563097	19563075	19563098	+	4	0	AGO1-4,AGO2	1	0	1	0	1	0	0	11
MIMAT0000278	hsa-miR-221-3p	ENSG00000185716	MOSMO	protein_coding	chr16	22093131	22093137	22093131	22093137	+	3	0	AGO1-4,AGO2	0	0	0	0	0	1	1	8
MIMAT0000278	hsa-miR-221-3p	ENSG00000166847	DCTN5	protein_coding	chr16	23678836	23678842	23678836	23678842	+	7	0	AGO1-4,AGO2	1	0	0	0	0	0	0	8
MIMAT0000278	hsa-miR-221-3p	ENSG00000122257	RBBP6	protein_coding	chr16	24560357	24560363	24560357	24560363	+	1	0	AGO2	0	0	0	0	1	0	0	10
MIMAT0000278	hsa-miR-221-3p	ENSG00000090905	TNRC6A	protein_coding	chr16	24836960	24836965	24836960	24836965	+	11	0	AGO1-4,AGO2	1	0	0	0	0	0	0	10
MIMAT0000278	hsa-miR-221-3p	ENSG00000188322	SBK1	protein_coding	chr16	28332868	28332873	28332846	28332874	+	1	0	AGO1	1	0	1	1	1	1	1	17
MIMAT0000278	hsa-miR-221-3p	ENSG00000175938	ORAI3	protein_coding	chr16	30965615	30965620	30965600	30965621	+	1	0	AGO1-4	1	1	0	0	0	0	0	7
MIMAT0000278	hsa-miR-221-3p	ENSG00000099381	SETD1A	protein_coding	chr16	30995586	30995591	30995586	30995591	+	5	0	AGO1-4,AGO2	1	0	0	0	0	0	0	12
MIMAT0000278	hsa-miR-221-3p	ENSG00000089280	FUS	protein_coding	chr16	31203944	31203964	31203944	31203964	+	1	0	AGO1-4	0	1	0	0	0	0	0	9
MIMAT0000278	hsa-miR-221-3p	ENSG00000197302	ZNF720	protein_coding	chr16	31766527	31766555	31766527	31766555	+	1	0	AGO2	0	0	0	1	0	0	0	13
MIMAT0000278	hsa-miR-221-3p	ENSG00000166123	GPT2	protein_coding	chr16	46964967	46964972	46964967	46964972	+	2	0	AGO1-4,AGO2	1	0	0	0	0	0	0	7
MIMAT0000278	hsa-miR-221-3p	ENSG00000083799	CYLD	protein_coding	chr16	50830820	50830825	50830798	50830826	+	1	0	AGO2	1	0	1	1	0	0	0	4
MIMAT0000278	hsa-miR-221-3p	ENSG00000176842	IRX5	protein_coding	chr16	54968033	54968038	54968011	54968039	+	2	0	AGO1-4,AGO2	1	0	1	1	1	1	1	7
MIMAT0000278	hsa-miR-221-3p	ENSG00000087253	LPCAT2	protein_coding	chr16	55618079	55618101	55618079	55618101	+	1	0	AGO2	0	0	0	0	1	0	0	4
MIMAT0000278	hsa-miR-221-3p	ENSG00000103021	CCDC113	protein_coding	chr16	58314627	58314632	58314627	58314632	+	1	0	AGO1-4	1	0	0	0	0	0	0	11
MIMAT0000278	hsa-miR-221-3p	ENSG00000140931	CMTM3	protein_coding	chr16	66647579	66647584	66647579	66647584	+	5	0	AGO1,AGO1-4,AGO2	1	0	0	0	0	0	0	7
MIMAT0000278	hsa-miR-221-3p	ENSG00000172840	PDP2	protein_coding	chr16	66920038	66920043	66920038	66920043	+	4	0	AGO1-4,AGO2	1	0	0	0	0	0	0	9
MIMAT0000278	hsa-miR-221-3p	ENSG00000067955	CBFB	protein_coding	chr16	67132883	67132888	67132861	67132889	+	15	0	AGO1,AGO1-4,AGO2	1	0	1	1	1	1	1	9
MIMAT0000278	hsa-miR-221-3p	ENSG00000102974	CTCF	protein_coding	chr16	67672481	67672486	67672459	67672487	+	13	0	AGO1,AGO1-4,AGO2,AGO3	1	0	0	1	1	1	1	11
MIMAT0000278	hsa-miR-221-3p	ENSG00000072736	NFATC3	protein_coding	chr16	68260945	68260950	68260923	68260951	+	11	0	AGO1,AGO1-4,AGO2	0	0	1	1	0	1	1	11
MIMAT0000278	hsa-miR-221-3p	ENSG00000103064	SLC7A6	protein_coding	chr16	68334058	68334063	68334058	68334063	+	1	0	AGO1-4	1	0	0	0	0	0	0	8
MIMAT0000278	hsa-miR-221-3p	ENSG00000184939	ZFP90	protein_coding	chr16	68597854	68597882	68597854	68597882	+	3	0	AGO1-4,AGO2	0	0	0	1	0	0	0	12
MIMAT0000278	hsa-miR-221-3p	ENSG00000103047	TANGO6	protein_coding	chr16	69118948	69118955	69118948	69118955	+	2	0	AGO1-4	1	0	0	0	0	0	0	8
MIMAT0000278	hsa-miR-221-3p	ENSG00000103044	HAS3	protein_coding	chr16	69150919	69150924	69150919	69150924	+	3	0	AGO2	1	0	0	0	0	0	0	5
MIMAT0000278	hsa-miR-221-3p	ENSG00000168807	SNTB2	protein_coding	chr16	69339799	69339804	69339799	69339804	+	7	0	AGO1-4,AGO2	1	0	0	0	0	0	0	3
MIMAT0000278	hsa-miR-221-3p	ENSG00000102908	NFAT5	protein_coding	chr16	69731180	69731185	69731180	69731185	+	4	0	AGO1-4,AGO2	1	0	1	0	0	0	0	6
MIMAT0000278	hsa-miR-221-3p	ENSG00000168872	DDX19A	protein_coding	chr16	70407161	70407166	70407161	70407166	+	2	0	AGO2	1	0	0	0	0	0	0	8
MIMAT0000278	hsa-miR-221-3p	ENSG00000172137	CALB2	protein_coding	chr16	71424185	71424190	71424185	71424190	+	3	0	AGO1-4	1	0	0	0	0	0	0	2
MIMAT0000278	hsa-miR-221-3p	ENSG00000182149	IST1	protein_coding	chr16	71962450	71962455	71962450	71962455	+	11	0	AGO1-4,AGO2	1	0	1	0	0	0	0	9
MIMAT0000278	hsa-miR-221-3p	ENSG00000166848	TERF2IP	protein_coding	chr16	75690657	75690662	75690657	75690662	+	2	0	AGO1-4	1	0	0	0	0	0	0	10
MIMAT0000278	hsa-miR-221-3p	ENSG00000166451	CENPN	protein_coding	chr16	81062457	81062462	81062457	81062462	+	8	0	AGO1-4,AGO2	1	0	0	0	0	0	0	4
MIMAT0000278	hsa-miR-221-3p	ENSG00000153815	CMIP	protein_coding	chr16	81743643	81743648	81743643	81743648	+	4	0	AGO1-4,AGO2	1	0	0	0	0	0	0	6
MIMAT0000278	hsa-miR-221-3p	ENSG00000103175	WFDC1	protein_coding	chr16	84363372	84363377	84363372	84363377	+	1	0	AGO2	1	0	0	0	0	0	0	13
MIMAT0000278	hsa-miR-221-3p	ENSG00000135709	KIAA0513	protein_coding	chr16	85122990	85122995	85122990	85122995	+	1	0	AGO1-4	1	0	0	0	0	0	0	7
MIMAT0000278	hsa-miR-221-3p	ENSG00000131149	GSE1	protein_coding	chr16	85709216	85709221	85709216	85709221	+	3	0	AGO1-4	1	0	0	0	0	0	0	18
MIMAT0000278	hsa-miR-221-3p	ENSG00000140941	MAP1LC3B	protein_coding	chr16	87437943	87437948	87437943	87437948	+	9	0	AGO1-4,AGO2	1	0	0	0	0	0	0	4
MIMAT0000278	hsa-miR-221-3p	ENSG00000154118	JPH3	protein_coding	chr16	87731358	87731363	87731358	87731363	+	1	0	AGO2	1	0	0	0	0	0	0	10
MIMAT0000278	hsa-miR-221-3p	ENSG00000167699	GLOD4	protein_coding	chr17	663058	663063	663058	663063	-	2	0	AGO1-4,AGO2	1	0	0	0	0	0	0	9
MIMAT0000278	hsa-miR-221-3p	ENSG00000197879	MYO1C	protein_coding	chr17	1368613	1368620	1368613	1368620	-	5	0	AGO1-4,AGO2	1	0	0	0	0	0	0	10
MIMAT0000278	hsa-miR-221-3p	ENSG00000174238	PITPNA	protein_coding	chr17	1423712	1423717	1423712	1423717	-	6	0	AGO1-4,AGO2	1	0	0	0	0	0	0	9
MIMAT0000278	hsa-miR-221-3p	ENSG00000070444	MNT	protein_coding	chr17	2287597	2287602	2287597	2287602	-	8	0	AGO1-4,AGO2	1	0	0	0	0	0	0	7
MIMAT0000278	hsa-miR-221-3p	ENSG00000127804	METTL16	protein_coding	chr17	2322541	2322546	2322541	2322546	-	1	0	AGO1-4	1	0	0	0	0	0	0	12
MIMAT0000278	hsa-miR-221-3p	ENSG00000074356	NCBP3	protein_coding	chr17	3743419	3743439	3743419	3743439	-	1	0	AGO2	0	1	0	0	0	0	0	15
MIMAT0000278	hsa-miR-221-3p	ENSG00000074370	ATP2A3	protein_coding	chr17	3827378	3827383	3827378	3827383	-	1	0	AGO1-4	1	0	0	0	0	0	0	12
MIMAT0000278	hsa-miR-221-3p	ENSG00000074755	ZZEF1	protein_coding	chr17	3909237	3909242	3909237	3909242	-	1	0	AGO2	1	0	1	0	0	0	0	11
MIMAT0000278	hsa-miR-221-3p	ENSG00000185722	ANKFY1	protein_coding	chr17	4069953	4069958	4069953	4069958	-	3	0	AGO1-4,AGO2	1	0	0	0	0	0	0	8
MIMAT0000278	hsa-miR-221-3p	ENSG00000180626	ZNF594	protein_coding	chr17	5084347	5084354	5084346	5084374	-	5	0	AGO1-4,AGO2	1	0	0	1	1	0	0	15
MIMAT0000278	hsa-miR-221-3p	ENSG00000072849	DERL2	protein_coding	chr17	5377303	5377308	5377303	5377308	-	1	0	AGO1-4	0	0	1	0	0	0	0	11
MIMAT0000278	hsa-miR-221-3p	ENSG00000004975	DVL2	protein_coding	chr17	7128729	7128735	7128728	7128750	-	4	0	AGO1-4,AGO2	1	0	0	0	1	0	0	13
MIMAT0000278	hsa-miR-221-3p	ENSG00000196544	BORCS6	protein_coding	chr17	8092139	8092144	8092139	8092144	-	1	0	AGO2	1	0	0	0	0	0	0	8
MIMAT0000278	hsa-miR-221-3p	ENSG00000197566	ZNF624	protein_coding	chr17	16525233	16525239	16525232	16525255	-	2	0	AGO2	1	0	1	0	1	0	0	12
MIMAT0000278	hsa-miR-221-3p	ENSG00000176974	SHMT1	protein_coding	chr17	18231726	18231731	18231726	18231731	-	1	0	AGO1-4	1	0	0	0	0	0	0	13
MIMAT0000278	hsa-miR-221-3p	ENSG00000083290	ULK2	protein_coding	chr17	19679564	19679569	19679564	19679569	-	2	0	AGO1-4,AGO2	1	0	1	0	0	0	0	14
MIMAT0000278	hsa-miR-221-3p	ENSG00000212719	C17orf51	protein_coding	chr17	21435154	21435160	21435154	21435160	-	3	0	AGO2	0	0	1	0	0	0	0	9
MIMAT0000278	hsa-miR-221-3p	ENSG00000109083	IFT20	protein_coding	chr17	26655604	26655609	26655604	26655609	-	3	0	AGO2	1	0	0	0	0	0	0	14
MIMAT0000278	hsa-miR-221-3p	ENSG00000076351	SLC46A1	protein_coding	chr17	26721927	26721933	26721926	26721954	-	3	0	AGO1-4,AGO2	1	0	1	1	1	0	0	16
MIMAT0000278	hsa-miR-221-3p	ENSG00000173065	FAM222B	protein_coding	chr17	27083093	27083098	27083093	27083098	-	16	0	AGO1,AGO1-4,AGO2	1	0	1	0	0	0	0	13
MIMAT0000278	hsa-miR-221-3p	ENSG00000132589	FLOT2	protein_coding	chr17	27206457	27206462	27206457	27206462	-	7	0	AGO1-4,AGO2	1	0	0	0	0	0	0	9
MIMAT0000278	hsa-miR-221-3p	ENSG00000109118	PHF12	protein_coding	chr17	27232464	27232469	27232463	27232485	-	10	0	AGO1-4,AGO2,AGO3	1	0	0	0	1	0	1	13
MIMAT0000278	hsa-miR-221-3p	ENSG00000108256	NUFIP2	protein_coding	chr17	27585777	27585783	27585777	27585783	-	12	0	AGO1,AGO1-4,AGO2	0	0	0	0	0	1	0	10
MIMAT0000278	hsa-miR-221-3p	ENSG00000108262	GIT1	protein_coding	chr17	27901264	27901269	27901264	27901269	-	6	0	AGO1-4,AGO2	1	0	0	0	0	0	0	6
MIMAT0000278	hsa-miR-221-3p	ENSG00000126860	EVI2A	protein_coding	chr17	29645007	29645013	29645006	29645028	-	3	0	AGO1-4,AGO2	1	0	1	0	1	0	0	6
MIMAT0000278	hsa-miR-221-3p	ENSG00000278540	ACACA	protein_coding	chr17	35442859	35442864	35442859	35442864	-	2	0	AGO1-4,AGO2	1	0	0	0	0	0	0	12
MIMAT0000278	hsa-miR-221-3p	ENSG00000275066	SYNRG	protein_coding	chr17	35875154	35875159	35875154	35875159	-	3	0	AGO2	0	0	1	0	0	0	0	12
MIMAT0000278	hsa-miR-221-3p	ENSG00000278053	DDX52	protein_coding	chr17	35973118	35973123	35973118	35973123	-	2	0	AGO2	1	0	0	0	0	0	0	10
MIMAT0000278	hsa-miR-221-3p	ENSG00000277363	SRCIN1	protein_coding	chr17	36686463	36686468	36686462	36686468	-	2	0	AGO1-4	1	0	0	0	0	0	1	14
MIMAT0000278	hsa-miR-221-3p	ENSG00000108306	FBXL20	protein_coding	chr17	37417045	37417050	37417045	37417050	-	5	0	AGO1-4,AGO2	1	0	0	0	0	0	0	12
MIMAT0000278	hsa-miR-221-3p	ENSG00000125686	MED1	protein_coding	chr17	37562996	37563001	37562996	37563001	-	2	0	AGO2	1	0	0	0	0	0	0	10
MIMAT0000278	hsa-miR-221-3p	ENSG00000173757	STAT5B	protein_coding	chr17	40352439	40352444	40352439	40352444	-	2	0	AGO2	1	0	0	0	0	0	0	14
MIMAT0000278	hsa-miR-221-3p	ENSG00000168610	STAT3	protein_coding	chr17	40465653	40465658	40465653	40465658	-	6	0	AGO1-4,AGO2	1	0	0	0	0	0	0	13
MIMAT0000278	hsa-miR-221-3p	ENSG00000012048	BRCA1	protein_coding	chr17	41196664	41196669	41196664	41196669	-	2	0	AGO2	1	0	0	0	0	0	0	9
MIMAT0000278	hsa-miR-221-3p	ENSG00000013306	SLC25A39	protein_coding	chr17	42397086	42397091	42397086	42397091	-	14	0	AGO1-4,AGO2	1	0	0	0	0	0	0	4
MIMAT0000278	hsa-miR-221-3p	ENSG00000120071	KANSL1	protein_coding	chr17	44107422	44107428	44107421	44107443	-	2	0	AGO1-4,AGO2	1	0	1	0	1	0	1	13
MIMAT0000278	hsa-miR-221-3p	ENSG00000260027	HOXB7	protein_coding	chr17	46684908	46684913	46684908	46684913	-	5	0	AGO1,AGO2	1	0	0	0	0	0	0	6
MIMAT0000278	hsa-miR-221-3p	ENSG00000170689	HOXB9	protein_coding	chr17	46699339	46699344	46699339	46699344	-	1	0	AGO2	1	0	0	0	0	0	0	8
MIMAT0000278	hsa-miR-221-3p	ENSG00000198740	ZNF652	protein_coding	chr17	47366707	47366713	47366707	47366714	-	21	0	AGO1,AGO1-4,AGO2,AGO3	0	0	0	0	0	1	1	17
MIMAT0000278	hsa-miR-221-3p	ENSG00000011258	MBTD1	protein_coding	chr17	49270297	49270321	49270297	49270321	-	2	0	AGO1,AGO2	0	0	0	0	1	0	0	14
MIMAT0000278	hsa-miR-221-3p	ENSG00000180891	CUEDC1	protein_coding	chr17	55940387	55940392	55940387	55940392	-	1	0	AGO2	1	0	0	0	0	0	0	6
MIMAT0000278	hsa-miR-221-3p	ENSG00000136451	VEZF1	protein_coding	chr17	56049925	56049930	56049924	56049952	-	6	0	AGO1-4,AGO2	1	0	0	1	1	1	1	10
MIMAT0000278	hsa-miR-221-3p	ENSG00000136450	SRSF1	protein_coding	chr17	56082090	56082095	56082090	56082095	-	5	0	AGO1,AGO1-4	1	0	0	0	0	0	0	11
MIMAT0000278	hsa-miR-221-3p	ENSG00000170832	USP32	protein_coding	chr17	58256560	58256565	58256560	58256565	-	8	0	AGO1-4,AGO2	1	0	0	0	0	0	0	8
MIMAT0000278	hsa-miR-221-3p	ENSG00000062725	APPBP2	protein_coding	chr17	58521649	58521654	58521649	58521654	-	1	0	AGO1-4	1	0	0	0	0	0	0	16
MIMAT0000278	hsa-miR-221-3p	ENSG00000108506	INTS2	protein_coding	chr17	59943274	59943279	59943274	59943279	-	6	0	AGO1-4,AGO2	1	0	0	0	0	0	0	10
MIMAT0000278	hsa-miR-221-3p	ENSG00000008283	CYB561	protein_coding	chr17	61510982	61510987	61510982	61510987	-	1	0	AGO1-4	1	0	0	0	0	0	0	12
MIMAT0000278	hsa-miR-221-3p	ENSG00000136478	TEX2	protein_coding	chr17	62226251	62226256	62226251	62226256	-	2	0	AGO1-4,AGO2	1	0	0	0	0	0	0	10
MIMAT0000278	hsa-miR-221-3p	ENSG00000120063	GNA13	protein_coding	chr17	63006961	63006966	63006961	63006966	-	3	0	AGO1-4,AGO2	1	0	0	0	0	0	0	9
MIMAT0000278	hsa-miR-221-3p	ENSG00000168646	AXIN2	protein_coding	chr17	63524709	63524714	63524708	63524736	-	2	0	AGO2	1	0	1	1	1	1	1	16
MIMAT0000278	hsa-miR-221-3p	ENSG00000108932	SLC16A6	protein_coding	chr17	66263483	66263490	66263483	66263490	-	3	0	AGO1-4,AGO2	0	0	0	0	0	0	1	7
MIMAT0000278	hsa-miR-221-3p	ENSG00000141338	ABCA8	protein_coding	chr17	66863493	66863499	66863492	66863520	-	1	0	AGO2	1	0	1	1	1	0	0	15
MIMAT0000278	hsa-miR-221-3p	ENSG00000179604	CDC42EP4	protein_coding	chr17	71280081	71280087	71280081	71280087	-	1	0	AGO1-4	1	0	0	0	0	0	0	7
MIMAT0000278	hsa-miR-221-3p	ENSG00000125447	GGA3	protein_coding	chr17	73234254	73234259	73234254	73234259	-	11	0	AGO1-4,AGO2	1	0	0	0	0	0	0	5
MIMAT0000278	hsa-miR-221-3p	ENSG00000161533	ACOX1	protein_coding	chr17	73942089	73942094	73942089	73942094	-	2	0	AGO1-4	1	0	0	0	0	0	0	13
MIMAT0000278	hsa-miR-221-3p	ENSG00000175931	UBE2O	protein_coding	chr17	74386481	74386486	74386481	74386486	-	4	0	AGO2	1	0	0	0	0	0	0	10
MIMAT0000278	hsa-miR-221-3p	ENSG00000161547	SRSF2	protein_coding	chr17	74730630	74730635	74730629	74730635	-	27	0	AGO1,AGO1-4,AGO2,AGO3	1	0	0	0	0	1	1	9
MIMAT0000278	hsa-miR-221-3p	ENSG00000167900	TK1	protein_coding	chr17	76170199	76170204	76170199	76170204	-	9	0	AGO1,AGO1-4,AGO2	1	0	0	0	0	0	0	3
MIMAT0000278	hsa-miR-221-3p	ENSG00000184557	SOCS3	protein_coding	chr17	76353250	76353256	76353249	76353269	-	12	0	AGO1-4,AGO2	1	0	1	0	1	0	1	5
MIMAT0000278	hsa-miR-221-3p	ENSG00000055483	USP36	protein_coding	chr17	76793256	76793261	76793256	76793261	-	9	0	AGO1,AGO1-4,AGO2	1	0	0	0	0	0	0	5
MIMAT0000278	hsa-miR-221-3p	ENSG00000035862	TIMP2	protein_coding	chr17	76851336	76851341	76851335	76851341	-	2	0	AGO1-4	1	0	0	0	0	0	1	8
MIMAT0000278	hsa-miR-221-3p	ENSG00000171246	NPTX1	protein_coding	chr17	78442541	78442546	78442541	78442546	-	2	0	AGO2	1	0	0	0	0	0	0	11
MIMAT0000278	hsa-miR-221-3p	ENSG00000129204	USP6	protein_coding	chr17	5076324	5076329	5076324	5076329	+	1	0	AGO2	1	0	0	0	0	0	0	7
MIMAT0000278	hsa-miR-221-3p	ENSG00000167842	MIS12	protein_coding	chr17	5393510	5393516	5393494	5393517	+	2	0	AGO1-4,AGO2	1	0	1	0	1	0	0	14
MIMAT0000278	hsa-miR-221-3p	ENSG00000166579	NDEL1	protein_coding	chr17	8371324	8371329	8371308	8371330	+	7	0	AGO1-4,AGO2	1	0	0	0	1	0	0	7
MIMAT0000278	hsa-miR-221-3p	ENSG00000065559	MAP2K4	protein_coding	chr17	12045491	12045496	12045491	12045496	+	1	0	AGO2	1	0	0	0	0	0	0	8
MIMAT0000278	hsa-miR-221-3p	ENSG00000125430	HS3ST3B1	protein_coding	chr17	14249460	14249466	14249445	14249467	+	1	0	AGO1-4	1	0	0	0	1	0	0	7
MIMAT0000278	hsa-miR-221-3p	ENSG00000133030	MPRIP	protein_coding	chr17	17095878	17095884	17095878	17095884	+	1	0	AGO1-4	0	0	0	0	0	0	1	5
MIMAT0000278	hsa-miR-221-3p	ENSG00000142494	SLC47A1	protein_coding	chr17	19482162	19482167	19482162	19482167	+	1	0	AGO2	1	0	0	0	0	0	0	11
MIMAT0000278	hsa-miR-221-3p	ENSG00000128487	SPECC1	protein_coding	chr17	20222113	20222118	20222113	20222118	+	1	0	AGO1-4	0	0	1	0	0	0	0	8
MIMAT0000278	hsa-miR-221-3p	ENSG00000141068	KSR1	protein_coding	chr17	25950414	25950419	25950394	25950420	+	1	0	AGO1-4	1	0	0	0	1	1	1	11
MIMAT0000278	hsa-miR-221-3p	ENSG00000266728	AC015688.5	protein_coding	chr17	25950414	25950419	25950394	25950420	+	1	0	AGO1-4	1	0	0	0	1	1	1	3
MIMAT0000278	hsa-miR-221-3p	ENSG00000087095	NLK	protein_coding	chr17	26521695	26521700	26521673	26521701	+	6	0	AGO1-4,AGO2	1	0	1	1	1	1	1	15
MIMAT0000278	hsa-miR-221-3p	ENSG00000076604	TRAF4	protein_coding	chr17	27077826	27077831	27077826	27077831	+	1	0	AGO2	1	0	0	0	0	0	0	11
MIMAT0000278	hsa-miR-221-3p	ENSG00000160551	TAOK1	protein_coding	chr17	27872730	27872736	27872730	27872736	+	1	0	AGO2	0	0	0	0	0	1	0	12
MIMAT0000278	hsa-miR-221-3p	ENSG00000108587	GOSR1	protein_coding	chr17	28853477	28853484	28853477	28853484	+	2	0	AGO1,AGO1-4	1	0	0	0	0	0	0	13
MIMAT0000278	hsa-miR-221-3p	ENSG00000181481	RNF135	protein_coding	chr17	29326767	29326772	29326767	29326772	+	4	0	AGO1-4,AGO2	1	0	0	0	0	0	0	9
MIMAT0000278	hsa-miR-221-3p	ENSG00000010244	ZNF207	protein_coding	chr17	30699631	30699636	30699609	30699637	+	1	0	AGO1-4	0	0	1	1	0	0	0	10
MIMAT0000278	hsa-miR-221-3p	ENSG00000108671	PSMD11	protein_coding	chr17	30807771	30807786	30807771	30807786	+	3	0	AGO1-4,AGO2	0	0	0	0	1	0	0	7
MIMAT0000278	hsa-miR-221-3p	ENSG00000176749	CDK5R1	protein_coding	chr17	30818063	30818068	30818063	30818068	+	16	0	AGO1,AGO1-4,AGO2,AGO3	1	0	0	0	0	0	0	8
MIMAT0000278	hsa-miR-221-3p	ENSG00000166750	SLFN5	protein_coding	chr17	33592546	33592552	33592530	33592553	+	3	0	AGO1-4,AGO2	0	0	1	0	1	0	0	5
MIMAT0000278	hsa-miR-221-3p	ENSG00000006125	AP2B1	protein_coding	chr17	34051950	34051955	34051950	34051955	+	4	0	AGO1-4,AGO2	1	0	0	0	0	0	0	8
MIMAT0000278	hsa-miR-221-3p	ENSG00000273611	ZNHIT3	protein_coding	chr17	34842544	34842565	34842544	34842565	+	2	0	AGO1-4	0	0	0	0	1	0	0	14
MIMAT0000278	hsa-miR-221-3p	ENSG00000274211	SOCS7	protein_coding	chr17	36560135	36560140	36560134	36560141	+	5	0	AGO1-4,AGO2	0	0	0	0	0	1	1	17
MIMAT0000278	hsa-miR-221-3p	ENSG00000275023	MLLT6	protein_coding	chr17	36885796	36885801	36885795	36885802	+	1	0	AGO1-4	1	0	0	0	0	1	1	10
MIMAT0000278	hsa-miR-221-3p	ENSG00000108342	CSF3	protein_coding	chr17	38173355	38173360	38173355	38173360	+	3	0	AGO1-4	1	0	0	0	0	0	0	3
MIMAT0000278	hsa-miR-221-3p	ENSG00000188895	MSL1	protein_coding	chr17	38290655	38290660	38290655	38290661	+	13	0	AGO1,AGO1-4,AGO2	1	0	0	0	0	1	1	14
MIMAT0000278	hsa-miR-221-3p	ENSG00000141753	IGFBP4	protein_coding	chr17	38613794	38613799	38613794	38613799	+	12	1	AGO1-4,AGO2	1	0	0	0	0	0	0	9
MIMAT0000278	hsa-miR-221-3p	ENSG00000173812	EIF1	protein_coding	chr17	39847743	39847749	39847729	39847750	+	28	0	AGO1,AGO1-4,AGO2	1	0	0	0	1	0	1	7
MIMAT0000278	hsa-miR-221-3p	ENSG00000198863	RUNDC1	protein_coding	chr17	41145608	41145613	41145608	41145613	+	2	0	AGO1-4,AGO2	1	0	1	0	0	0	0	14
MIMAT0000278	hsa-miR-221-3p	ENSG00000175906	ARL4D	protein_coding	chr17	41478281	41478305	41478281	41478305	+	1	0	AGO2	0	0	0	0	1	0	0	4
MIMAT0000278	hsa-miR-221-3p	ENSG00000186834	HEXIM1	protein_coding	chr17	43227789	43227795	43227768	43227796	+	11	0	AGO1-4,AGO2	1	0	1	1	1	0	0	9
MIMAT0000278	hsa-miR-221-3p	ENSG00000082641	NFE2L1	protein_coding	chr17	46138026	46138033	46138026	46138033	+	6	0	AGO1-4,AGO2	1	0	0	0	0	0	0	6
MIMAT0000278	hsa-miR-221-3p	ENSG00000005884	ITGA3	protein_coding	chr17	48167760	48167765	48167760	48167765	+	6	0	AGO1-4,AGO2	1	0	0	0	0	0	0	2
MIMAT0000278	hsa-miR-221-3p	ENSG00000108848	LUC7L3	protein_coding	chr17	48828239	48828244	48828239	48828245	+	4	0	AGO1-4,AGO2	1	0	1	0	0	1	1	12
MIMAT0000278	hsa-miR-221-3p	ENSG00000153933	DGKE	protein_coding	chr17	54941225	54941230	54941225	54941230	+	2	0	AGO1-4,AGO2	0	0	1	0	0	0	0	12
MIMAT0000278	hsa-miR-221-3p	ENSG00000121057	AKAP1	protein_coding	chr17	55183595	55183617	55183595	55183617	+	5	0	AGO1-4,AGO2	0	0	0	0	1	0	0	12
MIMAT0000278	hsa-miR-221-3p	ENSG00000153944	MSI2	protein_coding	chr17	55759395	55759400	55759395	55759400	+	2	0	AGO1-4	0	0	1	0	0	0	0	14
MIMAT0000278	hsa-miR-221-3p	ENSG00000175175	PPM1E	protein_coding	chr17	57059546	57059552	57059546	57059552	+	2	0	AGO1-4,AGO2	1	0	0	0	0	0	0	14
MIMAT0000278	hsa-miR-221-3p	ENSG00000108443	RPS6KB1	protein_coding	chr17	58026915	58026920	58026915	58026920	+	2	0	AGO1-4,AGO2	1	0	0	0	0	0	0	9
MIMAT0000278	hsa-miR-221-3p	ENSG00000170836	PPM1D	protein_coding	chr17	58700949	58700973	58700949	58700973	+	8	0	AGO1-4,AGO2	0	0	0	0	1	0	0	14
MIMAT0000278	hsa-miR-221-3p	ENSG00000087995	METTL2A	protein_coding	chr17	60526154	60526159	60526154	60526159	+	5	0	AGO1-4,AGO2	1	0	0	0	0	0	0	14
MIMAT0000278	hsa-miR-221-3p	ENSG00000146872	TLK2	protein_coding	chr17	60690386	60690391	60690386	60690391	+	1	0	AGO1-4	1	0	0	0	0	0	0	14
MIMAT0000278	hsa-miR-221-3p	ENSG00000136485	DCAF7	protein_coding	chr17	61667883	61667888	61667883	61667888	+	1	0	AGO1-4	1	0	0	0	0	0	0	12
MIMAT0000278	hsa-miR-221-3p	ENSG00000198909	MAP3K3	protein_coding	chr17	61772258	61772263	61772258	61772263	+	5	0	AGO1-4,AGO2	1	0	0	0	0	0	0	5
MIMAT0000278	hsa-miR-221-3p	ENSG00000198231	DDX42	protein_coding	chr17	61896074	61896080	61896059	61896081	+	3	0	AGO1-4,AGO2	1	0	1	0	1	0	0	13
MIMAT0000278	hsa-miR-221-3p	ENSG00000182481	KPNA2	protein_coding	chr17	66042713	66042723	66042713	66042723	+	28	0	AGO1,AGO1-4,AGO2,AGO3	0	0	0	0	1	0	0	6
MIMAT0000278	hsa-miR-221-3p	ENSG00000109089	CDR2L	protein_coding	chr17	73000848	73000853	73000848	73000853	+	2	0	AGO1-4,AGO2	1	0	0	0	0	0	0	8
MIMAT0000278	hsa-miR-221-3p	ENSG00000180901	KCTD2	protein_coding	chr17	73060706	73060711	73060706	73060711	+	2	0	AGO1-4	1	0	0	0	0	0	0	10
MIMAT0000278	hsa-miR-221-3p	ENSG00000125445	MRPS7	protein_coding	chr17	73262129	73262135	73262112	73262136	+	11	0	AGO1-4,AGO2	1	0	1	0	1	0	0	12
MIMAT0000278	hsa-miR-221-3p	ENSG00000182173	TSEN54	protein_coding	chr17	73520591	73520596	73520591	73520596	+	4	0	AGO1-4,AGO2	1	0	0	0	0	0	0	7
MIMAT0000278	hsa-miR-221-3p	ENSG00000078687	TNRC6C	protein_coding	chr17	76102696	76102702	76102696	76102702	+	10	0	AGO1,AGO2,AGO3	0	0	0	0	0	1	1	16
MIMAT0000278	hsa-miR-221-3p	ENSG00000173894	CBX2	protein_coding	chr17	77760655	77760660	77760655	77760660	+	3	0	AGO2	1	0	0	0	0	0	0	14
MIMAT0000278	hsa-miR-221-3p	ENSG00000173821	RNF213	protein_coding	chr17	78367606	78367611	78367606	78367611	+	11	0	AGO1-4,AGO2	1	0	1	0	0	0	0	4
MIMAT0000278	hsa-miR-221-3p	ENSG00000141564	RPTOR	protein_coding	chr17	78939017	78939022	78939017	78939022	+	1	0	AGO1-4	1	0	0	0	0	0	0	11
MIMAT0000278	hsa-miR-221-3p	ENSG00000175866	BAIAP2	protein_coding	chr17	79089689	79089695	79089689	79089695	+	2	0	AGO1-4,AGO2	1	0	0	0	0	0	0	5
MIMAT0000278	hsa-miR-221-3p	ENSG00000183048	SLC25A10	protein_coding	chr17	79687290	79687295	79687290	79687295	+	2	0	AGO1-4,AGO2	1	0	0	0	0	0	0	12
MIMAT0000278	hsa-miR-221-3p	ENSG00000262660	AC139530.2	protein_coding	chr17	79687290	79687295	79687290	79687295	+	2	0	AGO1-4,AGO2	1	0	0	0	0	0	0	0
MIMAT0000278	hsa-miR-221-3p	ENSG00000154864	PIEZO2	protein_coding	chr18	10670396	10670401	10670395	10670402	-	1	0	AGO2	0	0	1	0	0	1	1	11
MIMAT0000278	hsa-miR-221-3p	ENSG00000141446	ESCO1	protein_coding	chr18	19109941	19109948	19109940	19109963	-	1	0	AGO1-4	1	0	0	0	1	0	0	12
MIMAT0000278	hsa-miR-221-3p	ENSG00000158201	ABHD3	protein_coding	chr18	19231383	19231388	19231382	19231403	-	8	0	AGO1,AGO2,AGO3	1	0	0	0	1	0	0	4
MIMAT0000278	hsa-miR-221-3p	ENSG00000170558	CDH2	protein_coding	chr18	25531519	25531524	25531518	25531540	-	4	0	AGO1,AGO2	1	0	0	0	1	1	1	14
MIMAT0000278	hsa-miR-221-3p	ENSG00000172466	ZNF24	protein_coding	chr18	32916380	32916385	32916380	32916385	-	2	0	AGO1-4,AGO2	1	0	1	0	0	0	0	17
MIMAT0000278	hsa-miR-221-3p	ENSG00000141424	SLC39A6	protein_coding	chr18	33688565	33688570	33688565	33688570	-	21	0	AGO1,AGO1-4,AGO2,AGO3,AGO4	1	0	0	0	0	0	0	12
MIMAT0000278	hsa-miR-221-3p	ENSG00000152223	EPG5	protein_coding	chr18	43431178	43431183	43431178	43431183	-	1	0	AGO2	1	0	0	0	0	0	0	4
MIMAT0000278	hsa-miR-221-3p	ENSG00000078043	PIAS2	protein_coding	chr18	44398168	44398174	44398167	44398174	-	1	0	AGO2	0	0	1	0	0	0	1	7
MIMAT0000278	hsa-miR-221-3p	ENSG00000167220	HDHD2	protein_coding	chr18	44634058	44634063	44634058	44634063	-	1	1	AGO2	1	0	0	0	0	0	0	12
MIMAT0000278	hsa-miR-221-3p	ENSG00000175387	SMAD2	protein_coding	chr18	45360015	45360020	45360015	45360020	-	5	0	AGO1-4,AGO2	1	0	1	0	0	0	0	13
MIMAT0000278	hsa-miR-221-3p	ENSG00000184828	ZBTB7C	protein_coding	chr18	45555001	45555006	45555001	45555006	-	1	0	AGO1-4	1	0	0	0	0	0	0	7
MIMAT0000278	hsa-miR-221-3p	ENSG00000101665	SMAD7	protein_coding	chr18	46447025	46447030	46447025	46447030	-	3	0	AGO1-4,AGO2	1	0	0	0	0	0	0	8
MIMAT0000278	hsa-miR-221-3p	ENSG00000177576	C18orf32	protein_coding	chr18	47008494	47008500	47008493	47008521	-	18	0	AGO1,AGO1-4,AGO2,AGO3,AGO4	1	0	1	1	1	0	0	16
MIMAT0000278	hsa-miR-221-3p	ENSG00000215472	RPL17-C18orf32	protein_coding	chr18	47008494	47008500	47008493	47008521	-	18	0	AGO1,AGO1-4,AGO2,AGO3,AGO4	1	0	1	1	1	0	0	2
MIMAT0000278	hsa-miR-221-3p	ENSG00000134046	MBD2	protein_coding	chr18	51679139	51679144	51679138	51679166	-	4	0	AGO1,AGO1-4,AGO2,AGO3	0	0	1	1	0	0	0	7
MIMAT0000278	hsa-miR-221-3p	ENSG00000196628	TCF4	protein_coding	chr18	52890706	52890711	52890705	52890711	-	3	0	AGO2	1	0	1	0	0	1	1	13
MIMAT0000278	hsa-miR-221-3p	ENSG00000134440	NARS	protein_coding	chr18	55268092	55268097	55268091	55268113	-	6	0	AGO1-4,AGO2	1	1	0	0	0	0	0	5
MIMAT0000278	hsa-miR-221-3p	ENSG00000171791	BCL2	protein_coding	chr18	60792386	60792392	60792386	60792392	-	1	0	AGO1-4	1	0	0	0	0	0	0	15
MIMAT0000278	hsa-miR-221-3p	ENSG00000119537	KDSR	protein_coding	chr18	60996136	60996142	60996135	60996163	-	1	0	AGO2	1	0	1	1	1	0	0	5
MIMAT0000278	hsa-miR-221-3p	ENSG00000176225	RTTN	protein_coding	chr18	67671312	67671317	67671312	67671317	-	1	0	AGO1-4	1	0	0	0	0	0	0	10
MIMAT0000278	hsa-miR-221-3p	ENSG00000180011	ZADH2	protein_coding	chr18	72911888	72911894	72911887	72911909	-	6	0	AGO1,AGO1-4,AGO2	1	0	1	0	1	0	1	12
MIMAT0000278	hsa-miR-221-3p	ENSG00000197971	MBP	protein_coding	chr18	74727444	74727449	74727444	74727449	-	1	0	AGO2	1	0	0	0	0	0	0	3
MIMAT0000278	hsa-miR-221-3p	ENSG00000122490	PQLC1	protein_coding	chr18	77662522	77662527	77662522	77662527	-	4	0	AGO1-4,AGO2	1	0	0	0	0	0	0	3
MIMAT0000278	hsa-miR-221-3p	ENSG00000101557	USP14	protein_coding	chr18	211693	211698	211693	211698	+	8	0	AGO1,AGO1-4,AGO2	1	0	1	0	0	0	0	6
MIMAT0000278	hsa-miR-221-3p	ENSG00000101596	SMCHD1	protein_coding	chr18	2800947	2800953	2800947	2800953	+	1	0	AGO2	0	0	1	0	0	0	0	6
MIMAT0000278	hsa-miR-221-3p	ENSG00000088756	ARHGAP28	protein_coding	chr18	6912499	6912505	6912484	6912506	+	1	0	AGO2	1	0	0	0	1	0	1	13
MIMAT0000278	hsa-miR-221-3p	ENSG00000173482	PTPRM	protein_coding	chr18	8406620	8406626	8406605	8406627	+	5	0	AGO1-4,AGO2	1	0	1	0	1	0	0	13
MIMAT0000278	hsa-miR-221-3p	ENSG00000168461	RAB31	protein_coding	chr18	9861700	9861707	9861700	9861707	+	6	0	AGO1-4,AGO2	1	0	0	0	0	0	0	6
MIMAT0000278	hsa-miR-221-3p	ENSG00000085415	SEH1L	protein_coding	chr18	12985877	12985882	12985877	12985882	+	4	0	AGO2	1	0	0	0	0	0	0	7
MIMAT0000278	hsa-miR-221-3p	ENSG00000101654	RNMT	protein_coding	chr18	13764135	13764140	13764133	13764140	+	1	0	AGO1-4	1	0	1	0	0	0	0	6
MIMAT0000278	hsa-miR-221-3p	ENSG00000168234	TTC39C	protein_coding	chr18	21712705	21712711	21712691	21712712	+	3	0	AGO1-4,AGO2	1	0	1	0	1	0	0	8
MIMAT0000278	hsa-miR-221-3p	ENSG00000154040	CABYR	protein_coding	chr18	21739914	21739919	21739892	21739920	+	2	0	AGO1,AGO1-4	1	0	0	1	1	1	0	11
MIMAT0000278	hsa-miR-221-3p	ENSG00000046604	DSG2	protein_coding	chr18	29127899	29127904	29127899	29127904	+	2	0	AGO1-4,AGO2	0	0	1	0	0	0	0	2
MIMAT0000278	hsa-miR-221-3p	ENSG00000141431	ASXL3	protein_coding	chr18	31330186	31330192	31330186	31330192	+	6	0	AGO1,AGO2,AGO3	0	0	1	0	0	0	0	14
MIMAT0000278	hsa-miR-221-3p	ENSG00000166974	MAPRE2	protein_coding	chr18	32721072	32721078	32721072	32721078	+	1	0	AGO1	1	0	0	0	0	0	0	16
MIMAT0000278	hsa-miR-221-3p	ENSG00000152242	C18orf25	protein_coding	chr18	43844022	43844028	43844001	43844029	+	2	0	AGO2	1	0	1	1	1	0	0	6
MIMAT0000278	hsa-miR-221-3p	ENSG00000141622	RNF165	protein_coding	chr18	44040245	44040250	44040245	44040251	+	1	0	AGO2	1	0	0	0	0	1	0	8
MIMAT0000278	hsa-miR-221-3p	ENSG00000134030	CTIF	protein_coding	chr18	46386420	46386425	46386420	46386426	+	1	0	AGO1-4	1	0	0	0	0	0	1	11
MIMAT0000278	hsa-miR-221-3p	ENSG00000119547	ONECUT2	protein_coding	chr18	55149839	55149845	55149839	55149845	+	1	0	AGO2	1	0	0	0	0	0	0	9
MIMAT0000278	hsa-miR-221-3p	ENSG00000206075	SERPINB5	protein_coding	chr18	61171093	61171099	61171074	61171100	+	2	0	AGO2	1	0	1	0	1	0	0	1
MIMAT0000278	hsa-miR-221-3p	ENSG00000197632	SERPINB2	protein_coding	chr18	61570872	61570878	61570851	61570879	+	5	0	AGO1-4,AGO2	1	0	1	1	1	0	0	1
MIMAT0000278	hsa-miR-221-3p	ENSG00000130856	ZNF236	protein_coding	chr18	74681145	74681150	74681145	74681150	+	1	0	AGO1-4	1	0	0	0	0	0	0	9
MIMAT0000278	hsa-miR-221-3p	ENSG00000101544	ADNP2	protein_coding	chr18	77897113	77897118	77897113	77897118	+	8	0	AGO1-4,AGO2	1	0	1	0	0	0	0	7
MIMAT0000278	hsa-miR-221-3p	ENSG00000127540	UQCR11	protein_coding	chr19	1597996	1598001	1597996	1598001	-	3	0	AGO1-4	1	0	0	0	0	0	0	10
MIMAT0000278	hsa-miR-221-3p	ENSG00000071564	TCF3	protein_coding	chr19	1609316	1609321	1609315	1609321	-	11	0	AGO1-4,AGO2	1	0	0	0	0	0	1	11
MIMAT0000278	hsa-miR-221-3p	ENSG00000176490	DIRAS1	protein_coding	chr19	2714622	2714627	2714621	2714649	-	3	0	AGO2	1	0	1	1	0	0	0	9
MIMAT0000278	hsa-miR-221-3p	ENSG00000105355	PLIN3	protein_coding	chr19	4838520	4838525	4838520	4838525	-	9	0	AGO1-4,AGO2	1	0	0	0	0	0	0	4
MIMAT0000278	hsa-miR-221-3p	ENSG00000130254	SAFB2	protein_coding	chr19	5587135	5587140	5587135	5587140	-	2	0	AGO1,AGO2	1	0	0	0	0	0	0	10
MIMAT0000278	hsa-miR-221-3p	ENSG00000074181	NOTCH3	protein_coding	chr19	15270516	15270521	15270516	15270521	-	7	0	AGO1-4,AGO2	1	0	0	0	0	0	0	8
MIMAT0000278	hsa-miR-221-3p	ENSG00000171903	CYP4F11	protein_coding	chr19	16023314	16023319	16023314	16023319	-	1	0	AGO1-4	1	0	0	0	0	0	0	3
MIMAT0000278	hsa-miR-221-3p	ENSG00000085872	CHERP	protein_coding	chr19	16628812	16628817	16628811	16628839	-	8	0	AGO1-4,AGO2	1	0	1	1	0	0	0	10
MIMAT0000278	hsa-miR-221-3p	ENSG00000127526	SLC35E1	protein_coding	chr19	16664160	16664167	16664160	16664167	-	3	0	AGO1-4	1	0	0	0	0	0	0	8
MIMAT0000278	hsa-miR-221-3p	ENSG00000131351	HAUS8	protein_coding	chr19	17160627	17160632	17160626	17160648	-	32	0	AGO1,AGO1-4,AGO2,AGO3	1	0	1	0	1	0	0	5
MIMAT0000278	hsa-miR-221-3p	ENSG00000105639	JAK3	protein_coding	chr19	17935753	17935758	17935752	17935780	-	1	0	AGO1-4	0	0	1	1	0	0	0	2
MIMAT0000278	hsa-miR-221-3p	ENSG00000105649	RAB3A	protein_coding	chr19	18308140	18308145	18308139	18308167	-	1	0	AGO2	1	0	1	1	1	0	0	16
MIMAT0000278	hsa-miR-221-3p	ENSG00000223802	CERS1	protein_coding	chr19	18988825	18988830	18988825	18988830	-	1	0	AGO2	1	0	0	0	0	0	0	11
MIMAT0000278	hsa-miR-221-3p	ENSG00000184162	NR2C2AP	protein_coding	chr19	19312258	19312263	19312257	19312279	-	20	0	AGO1,AGO1-4,AGO2,AGO3	1	0	1	0	1	0	0	8
MIMAT0000278	hsa-miR-221-3p	ENSG00000081665	ZNF506	protein_coding	chr19	19909853	19909859	19909853	19909859	-	1	0	AGO1-4	0	0	1	0	0	0	0	10
MIMAT0000278	hsa-miR-221-3p	ENSG00000197020	ZNF100	protein_coding	chr19	21906561	21906568	21906561	21906568	-	3	0	AGO1,AGO2	1	0	0	0	0	0	0	9
MIMAT0000278	hsa-miR-221-3p	ENSG00000167232	ZNF91	protein_coding	chr19	23541039	23541045	23541038	23541061	-	6	0	AGO1-4,AGO2	1	0	1	0	1	0	0	12
MIMAT0000278	hsa-miR-221-3p	ENSG00000131943	C19orf12	protein_coding	chr19	30192344	30192349	30192344	30192349	-	1	0	AGO2	1	0	0	0	0	0	0	10
MIMAT0000278	hsa-miR-221-3p	ENSG00000105186	ANKRD27	protein_coding	chr19	33088370	33088375	33088370	33088375	-	2	0	AGO1-4	1	0	0	0	0	0	0	6
MIMAT0000278	hsa-miR-221-3p	ENSG00000254004	ZNF260	protein_coding	chr19	37002036	37002041	37002036	37002041	-	10	0	AGO1,AGO2,AGO3	1	0	0	0	0	0	0	16
MIMAT0000278	hsa-miR-221-3p	ENSG00000120784	ZFP30	protein_coding	chr19	38123440	38123446	38123439	38123462	-	7	0	AGO1,AGO2,AGO3	1	0	1	0	1	0	0	13
MIMAT0000278	hsa-miR-221-3p	ENSG00000128000	ZNF780B	protein_coding	chr19	40539803	40539808	40539803	40539808	-	3	0	AGO2	0	0	1	0	0	0	0	8
MIMAT0000278	hsa-miR-221-3p	ENSG00000105221	AKT2	protein_coding	chr19	40738469	40738474	40738469	40738474	-	1	0	AGO1-4	1	0	0	0	0	0	0	8
MIMAT0000278	hsa-miR-221-3p	ENSG00000167378	IRGQ	protein_coding	chr19	44093556	44093561	44093555	44093583	-	4	0	AGO1-4	0	0	1	1	0	0	0	14
MIMAT0000278	hsa-miR-221-3p	ENSG00000125741	OPA3	protein_coding	chr19	46055029	46055035	46055029	46055035	-	3	0	AGO1,AGO1-4,AGO2	1	0	0	0	0	0	0	5
MIMAT0000278	hsa-miR-221-3p	ENSG00000104936	DMPK	protein_coding	chr19	46273531	46273536	46273531	46273536	-	4	0	AGO1-4	1	0	0	0	0	0	0	10
MIMAT0000278	hsa-miR-221-3p	ENSG00000105327	BBC3	protein_coding	chr19	47724957	47724962	47724956	47724984	-	6	0	AGO1,AGO1-4,AGO2	1	0	0	1	1	1	1	6
MIMAT0000278	hsa-miR-221-3p	ENSG00000105402	NAPA	protein_coding	chr19	47991125	47991131	47991124	47991151	-	11	2	AGO1-4,AGO2	1	0	0	0	1	0	0	10
MIMAT0000278	hsa-miR-221-3p	ENSG00000105483	CARD8	protein_coding	chr19	48714347	48714352	48714347	48714352	-	1	0	AGO2	1	0	1	0	0	0	0	8
MIMAT0000278	hsa-miR-221-3p	ENSG00000174951	FUT1	protein_coding	chr19	49252089	49252094	49252089	49252094	-	3	0	AGO1,AGO1-4,AGO2	1	0	0	0	0	0	0	4
MIMAT0000278	hsa-miR-221-3p	ENSG00000105552	BCAT2	protein_coding	chr19	49311075	49311098	49311075	49311098	-	2	0	AGO2	0	1	0	0	0	0	0	13
MIMAT0000278	hsa-miR-221-3p	ENSG00000126456	IRF3	protein_coding	chr19	50165794	50165816	50165794	50165816	-	4	0	AGO2	0	1	0	0	0	0	0	2
MIMAT0000278	hsa-miR-221-3p	ENSG00000197619	ZNF615	protein_coding	chr19	52495000	52495006	52494999	52495027	-	1	0	AGO2	1	0	1	1	1	0	0	10
MIMAT0000278	hsa-miR-221-3p	ENSG00000142556	ZNF614	protein_coding	chr19	52517753	52517758	52517753	52517758	-	2	0	AGO2	1	0	0	0	0	0	0	11
MIMAT0000278	hsa-miR-221-3p	ENSG00000204611	ZNF616	protein_coding	chr19	52617897	52617903	52617896	52617916	-	2	0	AGO1-4	1	0	1	0	1	0	0	11
MIMAT0000278	hsa-miR-221-3p	ENSG00000167766	ZNF83	protein_coding	chr19	53116177	53116183	53116176	53116200	-	5	0	AGO1,AGO1-4,AGO2	1	0	1	0	1	0	0	9
MIMAT0000278	hsa-miR-221-3p	ENSG00000179943	FIZ1	protein_coding	chr19	56103003	56103008	56103003	56103008	-	4	0	AGO1-4,AGO2	1	0	0	0	0	0	0	9
MIMAT0000278	hsa-miR-221-3p	ENSG00000197128	ZNF772	protein_coding	chr19	57984561	57984566	57984561	57984566	-	3	0	AGO1,AGO1-4,AGO2	1	0	0	0	0	0	0	8
MIMAT0000278	hsa-miR-221-3p	ENSG00000173480	ZNF417	protein_coding	chr19	58419045	58419050	58419045	58419050	-	1	0	AGO1-4	1	0	0	0	0	0	0	11
MIMAT0000278	hsa-miR-221-3p	ENSG00000083807	SLC27A5	protein_coding	chr19	59009733	59009738	59009733	59009738	-	1	0	AGO2	1	0	0	0	0	0	0	11
MIMAT0000278	hsa-miR-221-3p	ENSG00000099804	CDC34	protein_coding	chr19	541946	541951	541946	541951	+	1	0	AGO1-4	1	0	0	0	0	0	0	6
MIMAT0000278	hsa-miR-221-3p	ENSG00000167470	MIDN	protein_coding	chr19	1257601	1257606	1257579	1257607	+	44	0	AGO1,AGO1-4,AGO2,AGO3	1	0	1	1	1	1	1	6
MIMAT0000278	hsa-miR-221-3p	ENSG00000160633	SAFB	protein_coding	chr19	5668405	5668410	5668405	5668410	+	10	0	AGO1,AGO2	1	0	0	0	0	0	0	12
MIMAT0000278	hsa-miR-221-3p	ENSG00000130803	ZNF317	protein_coding	chr19	9272320	9272325	9272320	9272325	+	2	0	AGO2,AGO3	1	0	0	0	0	0	0	6
MIMAT0000278	hsa-miR-221-3p	ENSG00000090339	ICAM1	protein_coding	chr19	10396376	10396381	10396360	10396382	+	4	0	AGO1-4,AGO2	1	1	0	0	0	0	0	3
MIMAT0000278	hsa-miR-221-3p	ENSG00000065989	PDE4A	protein_coding	chr19	10579669	10579674	10579669	10579674	+	2	0	AGO1-4,AGO2	1	0	0	0	0	0	0	7
MIMAT0000278	hsa-miR-221-3p	ENSG00000142453	CARM1	protein_coding	chr19	11033272	11033277	11033272	11033277	+	8	0	AGO1-4,AGO2	1	0	0	0	0	0	0	2
MIMAT0000278	hsa-miR-221-3p	ENSG00000130164	LDLR	protein_coding	chr19	11244447	11244452	11244447	11244452	+	25	0	AGO1-4,AGO2	1	0	0	0	0	0	0	3
MIMAT0000278	hsa-miR-221-3p	ENSG00000132003	ZSWIM4	protein_coding	chr19	13942234	13942240	13942218	13942241	+	4	0	AGO1-4	1	0	1	0	1	0	1	6
MIMAT0000278	hsa-miR-221-3p	ENSG00000187912	CLEC17A	protein_coding	chr19	14721504	14721509	14721504	14721509	+	1	0	AGO2	1	0	0	0	0	0	0	4
MIMAT0000278	hsa-miR-221-3p	ENSG00000160961	ZNF333	protein_coding	chr19	14831144	14831150	14831129	14831151	+	2	0	AGO1-4	1	0	0	0	1	0	0	9
MIMAT0000278	hsa-miR-221-3p	ENSG00000072958	AP1M1	protein_coding	chr19	16345884	16345889	16345884	16345889	+	2	0	AGO1-4	1	0	0	0	0	0	0	11
MIMAT0000278	hsa-miR-221-3p	ENSG00000127511	SIN3B	protein_coding	chr19	16990389	16990394	16990389	16990394	+	1	0	AGO1-4	1	0	0	0	0	0	0	10
MIMAT0000278	hsa-miR-221-3p	ENSG00000179913	B3GNT3	protein_coding	chr19	17923793	17923798	17923793	17923798	+	1	0	AGO2	1	0	0	0	0	0	0	4
MIMAT0000278	hsa-miR-221-3p	ENSG00000130517	PGPEP1	protein_coding	chr19	18478404	18478410	18478404	18478410	+	1	0	AGO2	1	0	0	0	0	0	0	14
MIMAT0000278	hsa-miR-221-3p	ENSG00000005007	UPF1	protein_coding	chr19	18978926	18978931	18978926	18978931	+	7	0	AGO1-4,AGO2	1	0	0	0	0	0	0	9
MIMAT0000278	hsa-miR-221-3p	ENSG00000129933	MAU2	protein_coding	chr19	19468954	19468959	19468954	19468959	+	2	0	AGO2	1	0	0	0	0	0	0	12
MIMAT0000278	hsa-miR-221-3p	ENSG00000184635	ZNF93	protein_coding	chr19	20043523	20043545	20043523	20043545	+	1	0	AGO1-4	0	0	0	0	1	0	0	9
MIMAT0000278	hsa-miR-221-3p	ENSG00000160352	ZNF714	protein_coding	chr19	21304978	21304985	21304964	21304986	+	6	0	AGO1,AGO2	1	0	0	0	1	0	0	7
MIMAT0000278	hsa-miR-221-3p	ENSG00000196705	ZNF431	protein_coding	chr19	21368564	21368569	21368564	21368569	+	1	0	AGO1-4	1	0	1	0	0	0	0	8
MIMAT0000278	hsa-miR-221-3p	ENSG00000178904	DPY19L3	protein_coding	chr19	32973872	32973878	32973854	32973879	+	3	0	AGO1-4,AGO2	1	0	0	0	1	0	0	18
MIMAT0000278	hsa-miR-221-3p	ENSG00000153879	CEBPG	protein_coding	chr19	33872162	33872168	33872149	33872169	+	6	0	AGO1,AGO2	1	0	0	0	1	0	0	7
MIMAT0000278	hsa-miR-221-3p	ENSG00000257103	LSM14A	protein_coding	chr19	34719191	34719196	34719175	34719197	+	3	0	AGO1-4,AGO2	1	0	0	0	1	0	0	9
MIMAT0000278	hsa-miR-221-3p	ENSG00000089335	ZNF302	protein_coding	chr19	35176786	35176792	35176772	35176793	+	10	0	AGO1,AGO1-4,AGO2	1	0	0	0	1	0	0	13
MIMAT0000278	hsa-miR-221-3p	ENSG00000197841	ZNF181	protein_coding	chr19	35233249	35233255	35233228	35233256	+	5	0	AGO1-4,AGO2	1	0	1	1	1	0	0	16
MIMAT0000278	hsa-miR-221-3p	ENSG00000063322	MED29	protein_coding	chr19	39889855	39889860	39889855	39889860	+	1	0	AGO1-4	1	0	0	0	0	0	0	10
MIMAT0000278	hsa-miR-221-3p	ENSG00000128016	ZFP36	protein_coding	chr19	39899584	39899589	39899568	39899590	+	25	0	AGO1-4,AGO2	1	0	0	0	1	0	0	3
MIMAT0000278	hsa-miR-221-3p	ENSG00000130758	MAP3K10	protein_coding	chr19	40721235	40721241	40721214	40721242	+	2	0	AGO2	1	0	0	1	1	1	0	9
MIMAT0000278	hsa-miR-221-3p	ENSG00000196961	AP2A1	protein_coding	chr19	50310298	50310303	50310298	50310303	+	4	0	AGO1-4,AGO2	1	0	0	0	0	0	0	8
MIMAT0000278	hsa-miR-221-3p	ENSG00000108107	RPL28	protein_coding	chr19	55900087	55900092	55900087	55900092	+	2	0	AGO2	1	0	0	0	0	0	0	6
MIMAT0000278	hsa-miR-221-3p	ENSG00000197951	ZNF71	protein_coding	chr19	57134359	57134364	57134359	57134364	+	1	0	AGO2	1	0	0	0	0	0	0	10
MIMAT0000278	hsa-miR-221-3p	ENSG00000083844	ZNF264	protein_coding	chr19	57724925	57724930	57724925	57724930	+	3	0	AGO1,AGO1-4,AGO2	1	0	0	0	0	0	0	7
MIMAT0000278	hsa-miR-221-3p	ENSG00000197714	ZNF460	protein_coding	chr19	57804455	57804460	57804455	57804460	+	15	0	AGO1,AGO1-4,AGO2	1	0	1	0	0	0	0	3
MIMAT0000278	hsa-miR-221-3p	ENSG00000178229	ZNF543	protein_coding	chr19	57841817	57841823	57841800	57841824	+	3	0	AGO1-4,AGO2	1	0	1	0	1	0	0	10
MIMAT0000278	hsa-miR-221-3p	ENSG00000152433	ZNF547	protein_coding	chr19	57888596	57888624	57888596	57888624	+	1	0	AGO1	0	0	0	1	0	0	0	8
MIMAT0000278	hsa-miR-221-3p	ENSG00000171649	ZIK1	protein_coding	chr19	58103685	58103690	58103685	58103690	+	1	0	AGO2	1	0	1	0	0	0	0	11
MIMAT0000278	hsa-miR-221-3p	ENSG00000183647	ZNF530	protein_coding	chr19	58119212	58119217	58119212	58119217	+	3	0	AGO1-4,AGO2	1	0	0	0	0	0	0	8
MIMAT0000278	hsa-miR-221-3p	ENSG00000121417	ZNF211	protein_coding	chr19	58153288	58153316	58153288	58153316	+	2	0	AGO1-4,AGO2	0	0	0	1	0	0	0	9
MIMAT0000278	hsa-miR-221-3p	ENSG00000152443	ZNF776	protein_coding	chr19	58268671	58268676	58268669	58268676	+	2	0	AGO1-4	1	0	1	0	0	0	0	10
MIMAT0000278	hsa-miR-221-3p	ENSG00000182318	ZSCAN22	protein_coding	chr19	58851067	58851072	58851067	58851072	+	1	0	AGO2	1	0	0	0	0	0	0	10
MIMAT0000278	hsa-miR-221-3p	ENSG00000171574	ZNF584	protein_coding	chr19	58928935	58928957	58928935	58928957	+	3	0	AGO1-4,AGO2	0	0	0	0	1	0	0	8
MIMAT0000278	hsa-miR-221-3p	ENSG00000151353	TMEM18	protein_coding	chr2	668384	668389	668384	668389	-	1	0	AGO1-4	1	0	0	0	0	0	0	11
MIMAT0000278	hsa-miR-221-3p	ENSG00000130508	PXDN	protein_coding	chr2	1636022	1636027	1636022	1636027	-	9	0	AGO1-4,AGO2	1	0	0	0	0	0	0	10
MIMAT0000278	hsa-miR-221-3p	ENSG00000151694	ADAM17	protein_coding	chr2	9628652	9628657	9628652	9628657	-	1	0	AGO1-4	0	0	1	0	0	0	0	5
MIMAT0000278	hsa-miR-221-3p	ENSG00000115758	ODC1	protein_coding	chr2	10580585	10580590	10580585	10580590	-	6	0	AGO1-4,AGO2	1	0	0	0	0	0	0	13
MIMAT0000278	hsa-miR-221-3p	ENSG00000115761	NOL10	protein_coding	chr2	10762159	10762165	10762159	10762165	-	1	0	AGO1-4	0	0	1	0	0	0	0	8
MIMAT0000278	hsa-miR-221-3p	ENSG00000143870	PDIA6	protein_coding	chr2	10924178	10924183	10924178	10924183	-	23	0	AGO1-4,AGO2	1	0	0	0	0	0	0	8
MIMAT0000278	hsa-miR-221-3p	ENSG00000118965	WDR35	protein_coding	chr2	20113279	20113285	20113278	20113301	-	3	0	AGO1,AGO2	1	0	1	0	1	0	0	16
MIMAT0000278	hsa-miR-221-3p	ENSG00000115884	SDC1	protein_coding	chr2	20402122	20402127	20402122	20402127	-	7	0	AGO1,AGO1-4,AGO2	1	0	0	0	0	0	0	3
MIMAT0000278	hsa-miR-221-3p	ENSG00000119778	ATAD2B	protein_coding	chr2	23972864	23972869	23972863	23972891	-	1	0	AGO1-4	1	0	1	1	0	0	1	12
MIMAT0000278	hsa-miR-221-3p	ENSG00000163026	WDCP	protein_coding	chr2	24253777	24253782	24253777	24253782	-	2	0	AGO1-4,AGO2	1	0	1	0	0	0	0	12
MIMAT0000278	hsa-miR-221-3p	ENSG00000115128	SF3B6	protein_coding	chr2	24290467	24290472	24290466	24290488	-	12	0	AGO1,AGO1-4,AGO2	1	0	0	0	1	0	0	8
MIMAT0000278	hsa-miR-221-3p	ENSG00000115204	MPV17	protein_coding	chr2	27532435	27532440	27532435	27532440	-	4	0	AGO1-4,AGO2	1	0	0	0	0	0	0	9
MIMAT0000278	hsa-miR-221-3p	ENSG00000171055	FEZ2	protein_coding	chr2	36779730	36779735	36779730	36779735	-	4	0	AGO1-4,AGO2	1	0	0	0	0	0	0	4
MIMAT0000278	hsa-miR-221-3p	ENSG00000163171	CDC42EP3	protein_coding	chr2	37870869	37870874	37870869	37870874	-	1	0	AGO2	1	0	0	0	0	0	0	8
MIMAT0000278	hsa-miR-221-3p	ENSG00000138061	CYP1B1	protein_coding	chr2	38294724	38294729	38294723	38294751	-	1	0	AGO1-4	0	0	1	1	0	0	0	10
MIMAT0000278	hsa-miR-221-3p	ENSG00000119787	ATL2	protein_coding	chr2	38522383	38522388	38522382	38522404	-	3	0	AGO2	0	0	1	0	1	0	0	8
MIMAT0000278	hsa-miR-221-3p	ENSG00000115875	SRSF7	protein_coding	chr2	38971211	38971217	38971210	38971232	-	5	0	AGO1,AGO1-4,AGO2	1	0	0	0	1	0	1	11
MIMAT0000278	hsa-miR-221-3p	ENSG00000115944	COX7A2L	protein_coding	chr2	42577884	42577890	42577883	42577906	-	6	0	AGO1,AGO1-4,AGO2	1	0	1	0	1	0	0	7
MIMAT0000278	hsa-miR-221-3p	ENSG00000152518	ZFP36L2	protein_coding	chr2	43450074	43450080	43450074	43450102	-	33	0	AGO1,AGO1-4,AGO2	0	0	0	1	1	1	1	6
MIMAT0000278	hsa-miR-221-3p	ENSG00000180398	MCFD2	protein_coding	chr2	47132478	47132483	47132478	47132483	-	6	0	AGO1-4,AGO2	1	0	0	0	0	0	0	5
MIMAT0000278	hsa-miR-221-3p	ENSG00000138081	FBXO11	protein_coding	chr2	48040177	48040182	48040177	48040182	-	2	0	AGO1-4,AGO2	1	0	0	0	0	0	0	9
MIMAT0000278	hsa-miR-221-3p	ENSG00000115355	CCDC88A	protein_coding	chr2	55515665	55515670	55515665	55515670	-	1	0	AGO2	1	0	1	0	0	0	0	11
MIMAT0000278	hsa-miR-221-3p	ENSG00000275052	PPP4R3B	protein_coding	chr2	55776060	55776066	55776059	55776085	-	2	0	AGO1-4	1	0	0	0	1	0	0	12
MIMAT0000278	hsa-miR-221-3p	ENSG00000119866	BCL11A	protein_coding	chr2	60686756	60686761	60686756	60686761	-	1	0	AGO2	1	0	0	0	0	0	0	9
MIMAT0000278	hsa-miR-221-3p	ENSG00000115464	USP34	protein_coding	chr2	61415223	61415236	61415223	61415236	-	4	1	AGO1-4,AGO2	0	0	0	0	1	0	0	12
MIMAT0000278	hsa-miR-221-3p	ENSG00000115484	CCT4	protein_coding	chr2	62095254	62095260	62095253	62095281	-	3	0	AGO1-4,AGO2	0	0	1	1	0	0	1	8
MIMAT0000278	hsa-miR-221-3p	ENSG00000197329	PELI1	protein_coding	chr2	64320049	64320054	64320048	64320076	-	5	0	AGO2	1	0	1	1	1	0	0	8
MIMAT0000278	hsa-miR-221-3p	ENSG00000138069	RAB1A	protein_coding	chr2	65315537	65315542	65315536	65315564	-	33	0	AGO1,AGO1-4,AGO2,AGO3	1	0	1	1	1	1	1	8
MIMAT0000278	hsa-miR-221-3p	ENSG00000198369	SPRED2	protein_coding	chr2	65538031	65538037	65538030	65538058	-	9	0	AGO1-4,AGO2	1	0	1	1	1	0	1	6
MIMAT0000278	hsa-miR-221-3p	ENSG00000221823	PPP3R1	protein_coding	chr2	68407746	68407751	68407745	68407773	-	7	1	AGO1,AGO1-4,AGO2	1	0	1	1	1	1	1	7
MIMAT0000278	hsa-miR-221-3p	ENSG00000144040	SFXN5	protein_coding	chr2	73171499	73171506	73171499	73171506	-	3	0	AGO1-4,AGO2	1	0	0	0	0	0	0	5
MIMAT0000278	hsa-miR-221-3p	ENSG00000135631	RAB11FIP5	protein_coding	chr2	73302332	73302337	73302331	73302354	-	3	0	AGO1-4,AGO2	1	0	0	0	1	0	0	6
MIMAT0000278	hsa-miR-221-3p	ENSG00000114978	MOB1A	protein_coding	chr2	74383418	74383423	74383417	74383439	-	13	0	AGO1,AGO1-4,AGO2	1	0	0	0	1	0	0	5
MIMAT0000278	hsa-miR-221-3p	ENSG00000152291	TGOLN2	protein_coding	chr2	85549154	85549160	85549153	85549175	-	2	0	AGO1-4	1	0	1	0	1	0	0	5
MIMAT0000278	hsa-miR-221-3p	ENSG00000115561	CHMP3	protein_coding	chr2	86730824	86730845	86730824	86730845	-	1	0	AGO2	0	0	0	0	1	0	0	7
MIMAT0000278	hsa-miR-221-3p	ENSG00000172071	EIF2AK3	protein_coding	chr2	88856702	88856707	88856701	88856723	-	6	0	AGO1-4,AGO2	1	0	0	0	1	0	0	13
MIMAT0000278	hsa-miR-221-3p	ENSG00000186281	GPAT2	protein_coding	chr2	96687909	96687937	96687909	96687937	-	1	0	AGO1-4	0	0	0	1	0	0	0	5
MIMAT0000278	hsa-miR-221-3p	ENSG00000135956	TMEM127	protein_coding	chr2	96918674	96918679	96918674	96918679	-	7	0	AGO1-4,AGO2	1	0	0	0	0	0	0	7
MIMAT0000278	hsa-miR-221-3p	ENSG00000114988	LMAN2L	protein_coding	chr2	97371702	97371707	97371702	97371707	-	1	0	AGO1-4	1	0	0	0	0	0	0	9
MIMAT0000278	hsa-miR-221-3p	ENSG00000168758	SEMA4C	protein_coding	chr2	97526320	97526325	97526320	97526325	-	31	0	AGO1,AGO1-4,AGO2,AGO3	1	0	0	0	0	0	0	11
MIMAT0000278	hsa-miR-221-3p	ENSG00000071073	MGAT4A	protein_coding	chr2	99238022	99238028	99238021	99238043	-	6	0	AGO1-4,AGO2	1	0	0	0	1	0	0	15
MIMAT0000278	hsa-miR-221-3p	ENSG00000135945	REV1	protein_coding	chr2	100017503	100017508	100017502	100017524	-	4	0	AGO1-4,AGO2	1	0	0	0	1	0	1	11
MIMAT0000278	hsa-miR-221-3p	ENSG00000170500	LONRF2	protein_coding	chr2	100894354	100894359	100894354	100894359	-	2	0	AGO1-4	1	0	0	0	0	0	0	14
MIMAT0000278	hsa-miR-221-3p	ENSG00000163162	RNF149	protein_coding	chr2	101893198	101893203	101893198	101893203	-	8	0	AGO1-4,AGO2	1	0	0	0	0	0	0	5
MIMAT0000278	hsa-miR-221-3p	ENSG00000135966	TGFBRAP1	protein_coding	chr2	105882159	105882184	105882159	105882184	-	4	0	AGO1-4,AGO2	0	1	0	0	0	0	0	8
MIMAT0000278	hsa-miR-221-3p	ENSG00000125618	PAX8	protein_coding	chr2	113975829	113975835	113975828	113975849	-	1	0	AGO1-4	1	0	1	0	1	0	0	5
MIMAT0000278	hsa-miR-221-3p	ENSG00000115084	SLC35F5	protein_coding	chr2	114470650	114470655	114470649	114470677	-	3	0	AGO1-4	0	0	1	1	0	0	0	10
MIMAT0000278	hsa-miR-221-3p	ENSG00000163064	EN1	protein_coding	chr2	119600175	119600180	119600175	119600180	-	1	0	AGO1-4	1	0	0	0	0	0	0	2
MIMAT0000278	hsa-miR-221-3p	ENSG00000074054	CLASP1	protein_coding	chr2	122097271	122097276	122097271	122097276	-	1	0	AGO2	1	0	0	0	0	0	0	14
MIMAT0000278	hsa-miR-221-3p	ENSG00000169967	MAP3K2	protein_coding	chr2	128057732	128057738	128057732	128057738	-	1	0	AGO1-4	0	0	1	0	0	0	0	9
MIMAT0000278	hsa-miR-221-3p	ENSG00000144233	AMMECR1L	protein_coding	chr2	128620075	128620080	128620075	128620080	-	4	0	AGO1-4	1	0	0	0	0	0	0	10
MIMAT0000278	hsa-miR-221-3p	ENSG00000136715	SAP130	protein_coding	chr2	128698868	128698873	128698868	128698873	-	5	0	AGO1-4,AGO2	1	0	0	0	0	0	0	12
MIMAT0000278	hsa-miR-221-3p	ENSG00000136720	HS6ST1	protein_coding	chr2	129025193	129025198	129025193	129025198	-	2	0	AGO1-4,AGO2	1	0	0	0	0	0	0	7
MIMAT0000278	hsa-miR-221-3p	ENSG00000176771	NCKAP5	protein_coding	chr2	133430287	133430292	133430286	133430308	-	5	0	AGO2	1	0	0	0	1	0	0	10
MIMAT0000278	hsa-miR-221-3p	ENSG00000169554	ZEB2	protein_coding	chr2	145145590	145145611	145145590	145145618	-	1	1	AGO2	0	0	0	1	1	0	0	9
MIMAT0000278	hsa-miR-221-3p	ENSG00000162980	ARL5A	protein_coding	chr2	152657917	152657923	152657916	152657944	-	4	0	AGO1-4,AGO2	1	0	1	1	1	0	0	10
MIMAT0000278	hsa-miR-221-3p	ENSG00000283228	AC068547.1	protein_coding	chr2	152659526	152659531	152659525	152659553	-	7	0	AGO1-4,AGO2	1	0	1	1	0	0	0	0
MIMAT0000278	hsa-miR-221-3p	ENSG00000123636	BAZ2B	protein_coding	chr2	160175990	160175995	160175989	160176009	-	4	0	AGO1-4,AGO2	1	0	0	0	1	1	1	13
MIMAT0000278	hsa-miR-221-3p	ENSG00000153250	RBMS1	protein_coding	chr2	161130652	161130657	161130652	161130657	-	6	0	AGO1-4	1	0	0	0	0	0	0	7
MIMAT0000278	hsa-miR-221-3p	ENSG00000182263	FIGN	protein_coding	chr2	164461686	164461692	164461686	164461692	-	1	0	AGO1-4	0	0	0	0	0	0	1	10
MIMAT0000278	hsa-miR-221-3p	ENSG00000082438	COBLL1	protein_coding	chr2	165542040	165542047	165542040	165542047	-	2	0	AGO1-4	1	0	0	0	0	0	0	2
MIMAT0000278	hsa-miR-221-3p	ENSG00000115339	GALNT3	protein_coding	chr2	166605144	166605150	166605143	166605165	-	13	0	AGO1,AGO1-4,AGO2	1	0	1	0	1	0	0	7
MIMAT0000278	hsa-miR-221-3p	ENSG00000128656	CHN1	protein_coding	chr2	175664694	175664699	175664694	175664699	-	1	0	AGO2	1	0	0	0	0	0	0	9
MIMAT0000278	hsa-miR-221-3p	ENSG00000115966	ATF2	protein_coding	chr2	175939188	175939193	175939187	175939209	-	14	0	AGO1,AGO1-4,AGO2,AGO3	1	0	0	0	1	0	0	14
MIMAT0000278	hsa-miR-221-3p	ENSG00000144320	LNPK	protein_coding	chr2	176792284	176792289	176792284	176792289	-	1	0	AGO2	1	0	1	0	0	0	0	12
MIMAT0000278	hsa-miR-221-3p	ENSG00000144331	ZNF385B	protein_coding	chr2	180307167	180307172	180307166	180307188	-	1	0	AGO2	1	0	0	0	1	0	0	11
MIMAT0000278	hsa-miR-221-3p	ENSG00000138449	SLC40A1	protein_coding	chr2	190425968	190425974	190425967	190425995	-	1	0	AGO2	1	0	0	0	1	0	1	8
MIMAT0000278	hsa-miR-221-3p	ENSG00000081320	STK17B	protein_coding	chr2	197002098	197002103	197002098	197002103	-	16	0	AGO1-4,AGO2	1	0	0	0	0	0	0	6
MIMAT0000278	hsa-miR-221-3p	ENSG00000197121	PGAP1	protein_coding	chr2	197700259	197700287	197700259	197700287	-	1	0	AGO2	0	0	0	1	0	0	0	13
MIMAT0000278	hsa-miR-221-3p	ENSG00000173166	RAPH1	protein_coding	chr2	204301554	204301560	204301554	204301560	-	1	0	AGO1-4	1	0	0	0	0	0	0	10
MIMAT0000278	hsa-miR-221-3p	ENSG00000114933	INO80D	protein_coding	chr2	206862900	206862928	206862900	206862928	-	1	0	AGO2	0	0	0	1	0	0	0	9
MIMAT0000278	hsa-miR-221-3p	ENSG00000118263	KLF7	protein_coding	chr2	207943375	207943381	207943375	207943381	-	1	0	AGO2	0	0	0	0	0	1	0	4
MIMAT0000278	hsa-miR-221-3p	ENSG00000115365	LANCL1	protein_coding	chr2	211297859	211297864	211297859	211297864	-	6	0	AGO2	1	0	0	0	0	0	0	13
MIMAT0000278	hsa-miR-221-3p	ENSG00000178568	ERBB4	protein_coding	chr2	212241707	212241712	212241706	212241734	-	1	0	AGO2	1	0	1	1	1	1	1	10
MIMAT0000278	hsa-miR-221-3p	ENSG00000152056	AP1S3	protein_coding	chr2	224623204	224623209	224623204	224623209	-	6	0	AGO1-4,AGO2	1	0	0	0	0	0	0	7
MIMAT0000278	hsa-miR-221-3p	ENSG00000135905	DOCK10	protein_coding	chr2	225630195	225630200	225630195	225630200	-	7	0	AGO1-4,AGO2	1	0	0	0	0	0	0	4
MIMAT0000278	hsa-miR-221-3p	ENSG00000169047	IRS1	protein_coding	chr2	227596924	227596945	227596924	227596945	-	2	0	AGO1-4	0	0	0	0	1	0	0	6
MIMAT0000278	hsa-miR-221-3p	ENSG00000081052	COL4A4	protein_coding	chr2	227867821	227867826	227867821	227867826	-	1	0	AGO2	1	0	0	0	0	0	0	11
MIMAT0000278	hsa-miR-221-3p	ENSG00000085982	USP40	protein_coding	chr2	234384452	234384457	234384452	234384457	-	2	0	AGO1-4,AGO2	1	0	1	0	0	0	0	8
MIMAT0000278	hsa-miR-221-3p	ENSG00000168505	GBX2	protein_coding	chr2	237073960	237073966	237073959	237073987	-	1	0	AGO1-4	0	0	1	1	0	0	1	7
MIMAT0000278	hsa-miR-221-3p	ENSG00000144485	HES6	protein_coding	chr2	239146989	239146994	239146989	239146994	-	3	0	AGO2,AGO3	1	0	0	0	0	0	0	19
MIMAT0000278	hsa-miR-221-3p	ENSG00000132326	PER2	protein_coding	chr2	239153029	239153034	239153029	239153034	-	8	0	AGO1-4,AGO2	1	0	0	0	0	0	0	10
MIMAT0000278	hsa-miR-221-3p	ENSG00000068024	HDAC4	protein_coding	chr2	239974317	239974322	239974317	239974322	-	2	0	AGO1-4,AGO2	1	0	1	0	0	0	0	15
MIMAT0000278	hsa-miR-221-3p	ENSG00000122085	MTERF4	protein_coding	chr2	242034937	242034943	242034936	242034958	-	6	0	AGO1,AGO2	1	0	0	0	1	0	0	12
MIMAT0000278	hsa-miR-221-3p	ENSG00000176887	SOX11	protein_coding	chr2	5835646	5835651	5835646	5835652	+	5	0	AGO1-4,AGO2	1	0	0	0	0	0	1	10
MIMAT0000278	hsa-miR-221-3p	ENSG00000151692	RNF144A	protein_coding	chr2	7182067	7182072	7182067	7182072	+	1	0	AGO1-4	1	0	1	0	0	0	0	8
MIMAT0000278	hsa-miR-221-3p	ENSG00000134330	IAH1	protein_coding	chr2	9628393	9628413	9628393	9628413	+	14	0	AGO1,AGO2	0	1	0	0	1	0	0	8
MIMAT0000278	hsa-miR-221-3p	ENSG00000134317	GRHL1	protein_coding	chr2	10141732	10141737	10141732	10141737	+	5	0	AGO1-4,AGO2	1	0	0	0	0	0	0	5
MIMAT0000278	hsa-miR-221-3p	ENSG00000171848	RRM2	protein_coding	chr2	10269644	10269649	10269644	10269649	+	30	0	AGO1,AGO1-4,AGO2,AGO3	1	0	0	0	0	0	0	4
MIMAT0000278	hsa-miR-221-3p	ENSG00000162976	PQLC3	protein_coding	chr2	11318514	11318520	11318500	11318521	+	2	0	AGO1-4	1	0	0	0	1	0	0	7
MIMAT0000278	hsa-miR-221-3p	ENSG00000196208	GREB1	protein_coding	chr2	11780939	11780944	11780939	11780944	+	6	0	AGO1-4,AGO2	1	0	0	0	0	0	0	11
MIMAT0000278	hsa-miR-221-3p	ENSG00000173960	UBXN2A	protein_coding	chr2	24223607	24223612	24223591	24223613	+	2	0	AGO1,AGO1-4	1	0	0	0	1	0	0	7
MIMAT0000278	hsa-miR-221-3p	ENSG00000138018	SELENOI	protein_coding	chr2	26616338	26616343	26616338	26616343	+	4	0	AGO2	1	0	0	0	0	0	0	9
MIMAT0000278	hsa-miR-221-3p	ENSG00000213699	SLC35F6	protein_coding	chr2	27002190	27002195	27002190	27002195	+	4	0	AGO1-4,AGO2	1	0	0	0	0	0	0	5
MIMAT0000278	hsa-miR-221-3p	ENSG00000115163	CENPA	protein_coding	chr2	27017206	27017211	27017206	27017211	+	2	0	AGO2	1	0	0	0	0	0	0	6
MIMAT0000278	hsa-miR-221-3p	ENSG00000243147	MRPL33	protein_coding	chr2	28002419	28002424	28002419	28002424	+	3	0	AGO1,AGO1-4,AGO2	1	0	0	0	0	0	0	11
MIMAT0000278	hsa-miR-221-3p	ENSG00000075426	FOSL2	protein_coding	chr2	28637461	28637466	28637461	28637466	+	6	0	AGO1-4,AGO2	1	0	0	0	0	0	0	4
MIMAT0000278	hsa-miR-221-3p	ENSG00000213626	LBH	protein_coding	chr2	30481865	30481870	30481865	30481870	+	1	0	AGO1-4	1	0	0	0	0	0	0	7
MIMAT0000278	hsa-miR-221-3p	ENSG00000172954	LCLAT1	protein_coding	chr2	30864265	30864270	30864265	30864270	+	1	0	AGO1-4	1	0	1	0	0	0	0	11
MIMAT0000278	hsa-miR-221-3p	ENSG00000162878	PKDCC	protein_coding	chr2	42285170	42285193	42285170	42285193	+	2	0	AGO2	0	0	0	0	1	0	0	13
MIMAT0000278	hsa-miR-221-3p	ENSG00000143924	EML4	protein_coding	chr2	42558449	42558454	42558449	42558454	+	1	0	AGO1-4	1	0	0	0	0	0	0	10
MIMAT0000278	hsa-miR-221-3p	ENSG00000138032	PPM1B	protein_coding	chr2	44459667	44459672	44459667	44459672	+	8	0	AGO1-4,AGO2	1	0	0	0	0	0	0	14
MIMAT0000278	hsa-miR-221-3p	ENSG00000171150	SOCS5	protein_coding	chr2	46989554	46989559	46989538	46989560	+	4	0	AGO1-4,AGO2	1	0	0	0	1	0	1	10
MIMAT0000278	hsa-miR-221-3p	ENSG00000170802	FOXN2	protein_coding	chr2	48606206	48606211	48606184	48606212	+	11	0	AGO1,AGO1-4,AGO2,AGO3	1	0	0	1	1	1	1	6
MIMAT0000278	hsa-miR-221-3p	ENSG00000115421	PAPOLG	protein_coding	chr2	61024467	61024472	61024467	61024473	+	2	0	AGO1-4,AGO2	1	0	1	0	0	0	1	10
MIMAT0000278	hsa-miR-221-3p	ENSG00000162928	PEX13	protein_coding	chr2	61276510	61276531	61276510	61276531	+	1	0	AGO2	0	0	0	0	1	0	0	13
MIMAT0000278	hsa-miR-221-3p	ENSG00000119862	LGALSL	protein_coding	chr2	64685945	64685950	64685945	64685951	+	15	0	AGO1,AGO2,AGO3	1	0	0	0	0	0	1	11
MIMAT0000278	hsa-miR-221-3p	ENSG00000011523	CEP68	protein_coding	chr2	65311007	65311012	65311007	65311012	+	1	0	AGO1-4	1	0	0	0	0	0	0	14
MIMAT0000278	hsa-miR-221-3p	ENSG00000138071	ACTR2	protein_coding	chr2	65497479	65497485	65497464	65497486	+	5	0	AGO1-4,AGO2	1	0	1	0	1	0	0	5
MIMAT0000278	hsa-miR-221-3p	ENSG00000143995	MEIS1	protein_coding	chr2	66798402	66798408	66798387	66798409	+	2	0	AGO1-4	1	0	0	0	1	0	1	9
MIMAT0000278	hsa-miR-221-3p	ENSG00000115946	PNO1	protein_coding	chr2	68402192	68402198	68402173	68402199	+	2	0	AGO2	1	0	0	0	1	0	1	9
MIMAT0000278	hsa-miR-221-3p	ENSG00000059728	MXD1	protein_coding	chr2	70166579	70166584	70166579	70166585	+	13	0	AGO1-4,AGO2	1	0	0	0	0	0	1	5
MIMAT0000278	hsa-miR-221-3p	ENSG00000124356	STAMBP	protein_coding	chr2	74089436	74089441	74089436	74089441	+	11	0	AGO1-4,AGO2	1	0	1	0	0	0	0	10
MIMAT0000278	hsa-miR-221-3p	ENSG00000187605	TET3	protein_coding	chr2	74334787	74334792	74334787	74334792	+	10	0	AGO1-4,AGO2	1	0	0	0	0	0	0	13
MIMAT0000278	hsa-miR-221-3p	ENSG00000115282	TTC31	protein_coding	chr2	74721481	74721486	74721481	74721486	+	1	0	AGO1-4	1	0	0	0	0	0	0	11
MIMAT0000278	hsa-miR-221-3p	ENSG00000159399	HK2	protein_coding	chr2	75119981	75119986	75119981	75119986	+	1	0	AGO2	1	0	0	0	0	0	0	6
MIMAT0000278	hsa-miR-221-3p	ENSG00000168906	MAT2A	protein_coding	chr2	85771413	85771419	85771392	85771420	+	18	0	AGO1,AGO1-4,AGO2,AGO3	1	0	1	1	1	0	0	9
MIMAT0000278	hsa-miR-221-3p	ENSG00000132300	PTCD3	protein_coding	chr2	86367632	86367639	86367632	86367639	+	1	0	AGO1-4	1	0	0	0	0	0	0	13
MIMAT0000278	hsa-miR-221-3p	ENSG00000155066	PROM2	protein_coding	chr2	95956921	95956927	95956903	95956928	+	3	0	AGO1-4	1	0	1	0	1	0	0	3
MIMAT0000278	hsa-miR-221-3p	ENSG00000158158	CNNM4	protein_coding	chr2	97475847	97475852	97475847	97475852	+	1	0	AGO2	1	0	0	0	0	0	0	7
MIMAT0000278	hsa-miR-221-3p	ENSG00000168763	CNNM3	protein_coding	chr2	97498958	97498963	97498958	97498963	+	3	0	AGO1-4,AGO2	1	0	0	0	0	0	0	17
MIMAT0000278	hsa-miR-221-3p	ENSG00000071054	MAP4K4	protein_coding	chr2	102510935	102510940	102510935	102510940	+	1	0	AGO1-4	1	0	0	0	0	0	0	8
MIMAT0000278	hsa-miR-221-3p	ENSG00000233404	FLJ20373	protein_coding	chr2	102510935	102510940	102510935	102510940	+	1	0	AGO1-4	1	0	0	0	0	0	0	0
MIMAT0000278	hsa-miR-221-3p	ENSG00000170417	TMEM182	protein_coding	chr2	103433640	103433645	103433640	103433645	+	2	0	AGO2	1	0	0	0	0	0	0	16
MIMAT0000278	hsa-miR-221-3p	ENSG00000135974	C2orf49	protein_coding	chr2	105962851	105962857	105962851	105962857	+	5	0	AGO1,AGO2	0	0	1	0	0	0	0	14
MIMAT0000278	hsa-miR-221-3p	ENSG00000153201	RANBP2	protein_coding	chr2	109401217	109401222	109401201	109401223	+	5	0	AGO1-4,AGO2	1	0	0	0	1	1	1	11
MIMAT0000278	hsa-miR-221-3p	ENSG00000198142	SOWAHC	protein_coding	chr2	110374733	110374738	110374733	110374738	+	5	0	AGO1-4,AGO2	1	0	0	0	0	0	0	9
MIMAT0000278	hsa-miR-221-3p	ENSG00000153094	BCL2L11	protein_coding	chr2	111925861	111925866	111925848	111925867	+	43	0	AGO1,AGO1-4,AGO2,AGO3,AGO4	1	0	0	0	1	1	1	14
MIMAT0000278	hsa-miR-221-3p	ENSG00000144152	FBLN7	protein_coding	chr2	112945466	112945471	112945466	112945471	+	1	0	AGO1-4	1	0	0	0	0	0	0	7
MIMAT0000278	hsa-miR-221-3p	ENSG00000188177	ZC3H6	protein_coding	chr2	113090870	113090876	113090870	113090876	+	1	0	AGO1-4	1	0	0	0	0	0	1	10
MIMAT0000278	hsa-miR-221-3p	ENSG00000114999	TTL	protein_coding	chr2	113289828	113289833	113289828	113289833	+	8	0	AGO1-4,AGO2	1	0	0	0	0	0	0	9
MIMAT0000278	hsa-miR-221-3p	ENSG00000115091	ACTR3	protein_coding	chr2	114716816	114716822	114716795	114716823	+	4	0	AGO1-4,AGO2	0	0	1	1	0	0	0	4
MIMAT0000278	hsa-miR-221-3p	ENSG00000088205	DDX18	protein_coding	chr2	118589440	118589445	118589440	118589445	+	3	0	AGO1-4	1	0	0	0	0	0	0	7
MIMAT0000278	hsa-miR-221-3p	ENSG00000125629	INSIG2	protein_coding	chr2	118866865	118866870	118866865	118866870	+	3	1	AGO1-4,AGO2	1	0	0	0	0	0	0	9
MIMAT0000278	hsa-miR-221-3p	ENSG00000074047	GLI2	protein_coding	chr2	121749044	121749051	121749028	121749052	+	7	0	AGO1-4,AGO2	1	0	0	0	1	0	0	10
MIMAT0000278	hsa-miR-221-3p	ENSG00000173349	SFT2D3	protein_coding	chr2	128460150	128460156	128460135	128460157	+	13	0	AGO1-4,AGO2	1	0	0	0	1	0	0	0
MIMAT0000278	hsa-miR-221-3p	ENSG00000115762	PLEKHB2	protein_coding	chr2	131905681	131905686	131905681	131905686	+	2	0	AGO1,AGO2	1	0	0	0	0	0	0	6
MIMAT0000278	hsa-miR-221-3p	ENSG00000152127	MGAT5	protein_coding	chr2	135211637	135211642	135211637	135211642	+	1	0	AGO1-4	0	0	1	0	0	0	0	7
MIMAT0000278	hsa-miR-221-3p	ENSG00000082258	CCNT2	protein_coding	chr2	135712549	135712554	135712533	135712555	+	6	0	AGO1-4,AGO2	1	0	1	0	1	0	0	11
MIMAT0000278	hsa-miR-221-3p	ENSG00000115839	RAB3GAP1	protein_coding	chr2	135927325	135927330	135927325	135927330	+	3	0	AGO1-4,AGO2	1	0	0	0	0	0	0	9
MIMAT0000278	hsa-miR-221-3p	ENSG00000150540	HNMT	protein_coding	chr2	138771806	138771829	138771806	138771829	+	1	0	AGO2	0	0	0	0	1	0	0	11
MIMAT0000278	hsa-miR-221-3p	ENSG00000115919	KYNU	protein_coding	chr2	143746956	143746962	143746939	143746963	+	2	0	AGO1-4,AGO2	1	0	1	0	1	0	0	0
MIMAT0000278	hsa-miR-221-3p	ENSG00000121989	ACVR2A	protein_coding	chr2	148685100	148685106	148685085	148685107	+	3	0	AGO2	1	0	1	0	1	0	0	13
MIMAT0000278	hsa-miR-221-3p	ENSG00000168280	KIF5C	protein_coding	chr2	149882516	149882523	149882496	149882524	+	2	1	AGO2	1	0	0	1	1	0	0	20
MIMAT0000278	hsa-miR-221-3p	ENSG00000187123	LYPD6	protein_coding	chr2	150327532	150327537	150327532	150327537	+	1	0	AGO2	1	0	1	0	0	0	0	6
MIMAT0000278	hsa-miR-221-3p	ENSG00000115159	GPD2	protein_coding	chr2	157442162	157442168	157442147	157442169	+	15	0	AGO1-4,AGO2,AGO3	1	0	0	0	1	0	0	5
MIMAT0000278	hsa-miR-221-3p	ENSG00000091409	ITGA6	protein_coding	chr2	173369307	173369314	173369307	173369314	+	4	0	AGO1-4,AGO2	1	0	0	0	0	0	0	3
MIMAT0000278	hsa-miR-221-3p	ENSG00000091436	MAP3K20	protein_coding	chr2	174091246	174091251	174091246	174091251	+	4	0	AGO1-4,AGO2	1	0	0	0	0	0	0	7
MIMAT0000278	hsa-miR-221-3p	ENSG00000128710	HOXD10	protein_coding	chr2	176984556	176984561	176984556	176984561	+	1	0	AGO2	1	0	0	0	0	0	0	4
MIMAT0000278	hsa-miR-221-3p	ENSG00000170144	HNRNPA3	protein_coding	chr2	178084400	178084405	178084378	178084406	+	12	0	AGO1,AGO1-4,AGO2,AGO3	1	0	1	1	0	0	0	11
MIMAT0000278	hsa-miR-221-3p	ENSG00000155636	RBM45	protein_coding	chr2	178994349	178994354	178994332	178994355	+	1	0	AGO1-4	1	0	0	0	1	0	0	11
MIMAT0000278	hsa-miR-221-3p	ENSG00000116095	PLEKHA3	protein_coding	chr2	179368948	179368953	179368948	179368953	+	6	0	AGO1-4,AGO2	1	0	0	0	0	0	0	11
MIMAT0000278	hsa-miR-221-3p	ENSG00000170035	UBE2E3	protein_coding	chr2	181927794	181927799	181927772	181927800	+	3	4	AGO1-4,AGO2	1	0	1	1	1	0	0	8
MIMAT0000278	hsa-miR-221-3p	ENSG00000077232	DNAJC10	protein_coding	chr2	183642953	183642958	183642937	183642959	+	2	0	AGO2	1	0	0	0	1	0	0	15
MIMAT0000278	hsa-miR-221-3p	ENSG00000162999	DUSP19	protein_coding	chr2	183963919	183963926	183963899	183963927	+	4	0	AGO2	1	0	0	1	1	0	0	16
MIMAT0000278	hsa-miR-221-3p	ENSG00000163002	NUP35	protein_coding	chr2	184026013	184026018	184026013	184026018	+	12	0	AGO1,AGO1-4,AGO2	1	0	0	0	0	0	0	15
MIMAT0000278	hsa-miR-221-3p	ENSG00000115419	GLS	protein_coding	chr2	191798957	191798962	191798941	191798963	+	4	0	AGO1-4,AGO2	0	0	1	0	1	0	0	6
MIMAT0000278	hsa-miR-221-3p	ENSG00000196950	SLC39A10	protein_coding	chr2	196601074	196601080	196601057	196601081	+	3	0	AGO1-4,AGO2	1	0	0	0	1	0	0	10
MIMAT0000278	hsa-miR-221-3p	ENSG00000144395	CCDC150	protein_coding	chr2	197597314	197597319	197597314	197597319	+	1	0	AGO2	1	0	0	0	0	0	0	10
MIMAT0000278	hsa-miR-221-3p	ENSG00000115540	MOB4	protein_coding	chr2	198417098	198417105	198417098	198417105	+	4	0	AGO1-4,AGO2	1	0	0	0	0	0	0	7
MIMAT0000278	hsa-miR-221-3p	ENSG00000247626	MARS2	protein_coding	chr2	198572051	198572056	198572051	198572056	+	6	0	AGO1-4,AGO2	1	0	0	0	0	0	0	8
MIMAT0000278	hsa-miR-221-3p	ENSG00000196141	SPATS2L	protein_coding	chr2	201343061	201343066	201343061	201343067	+	16	0	AGO1-4,AGO2	1	0	0	0	0	1	0	5
MIMAT0000278	hsa-miR-221-3p	ENSG00000082153	BZW1	protein_coding	chr2	201688157	201688164	201688143	201688165	+	4	0	AGO1,AGO1-4,AGO2	1	0	0	0	1	0	0	9
MIMAT0000278	hsa-miR-221-3p	ENSG00000119013	NDUFB3	protein_coding	chr2	201950398	201950403	201950382	201950404	+	7	0	AGO1,AGO1-4,AGO2	1	0	0	0	1	0	0	7
MIMAT0000278	hsa-miR-221-3p	ENSG00000003400	CASP10	protein_coding	chr2	202084852	202084858	202084833	202084859	+	2	0	AGO2	1	0	0	0	1	0	1	3
MIMAT0000278	hsa-miR-221-3p	ENSG00000204217	BMPR2	protein_coding	chr2	203428830	203428835	203428830	203428835	+	1	0	AGO1-4	1	0	0	0	0	0	0	10
MIMAT0000278	hsa-miR-221-3p	ENSG00000138443	ABI2	protein_coding	chr2	204292347	204292352	204292347	204292352	+	5	0	AGO1,AGO1-4	1	0	0	0	0	0	0	13
MIMAT0000278	hsa-miR-221-3p	ENSG00000116117	PARD3B	protein_coding	chr2	206483810	206483815	206483810	206483815	+	1	0	AGO1-4	0	0	1	0	0	0	0	13
MIMAT0000278	hsa-miR-221-3p	ENSG00000118260	CREB1	protein_coding	chr2	208466834	208466840	208466834	208466840	+	4	0	AGO2	0	0	0	0	0	0	1	11
MIMAT0000278	hsa-miR-221-3p	ENSG00000197713	RPE	protein_coding	chr2	210885704	210885709	210885704	210885709	+	1	0	AGO1-4	1	0	0	0	0	0	0	5
MIMAT0000278	hsa-miR-221-3p	ENSG00000021826	CPS1	protein_coding	chr2	211542979	211542984	211542961	211542985	+	3	0	AGO1-4,AGO2	1	0	0	0	1	0	0	7
MIMAT0000278	hsa-miR-221-3p	ENSG00000127838	PNKD	protein_coding	chr2	219210074	219210079	219210059	219210080	+	1	0	AGO2	1	1	0	0	0	0	0	7
MIMAT0000278	hsa-miR-221-3p	ENSG00000123983	ACSL3	protein_coding	chr2	223807086	223807091	223807086	223807091	+	5	0	AGO1,AGO1-4,AGO2,AGO3	1	0	1	0	0	0	0	8
MIMAT0000278	hsa-miR-221-3p	ENSG00000173744	AGFG1	protein_coding	chr2	228420011	228420034	228420006	228420034	+	1	0	AGO2	0	0	0	1	1	0	0	5
MIMAT0000278	hsa-miR-221-3p	ENSG00000204120	GIGYF2	protein_coding	chr2	233722576	233722581	233722576	233722581	+	5	0	AGO1-4,AGO2	1	0	0	0	0	0	0	10
MIMAT0000278	hsa-miR-221-3p	ENSG00000130147	SH3BP4	protein_coding	chr2	235964237	235964242	235964221	235964243	+	7	0	AGO1-4,AGO2	1	0	0	0	1	1	1	11
MIMAT0000278	hsa-miR-221-3p	ENSG00000157985	AGAP1	protein_coding	chr2	237033291	237033296	237033269	237033297	+	2	0	AGO1,AGO1-4	1	0	1	1	0	0	0	16
MIMAT0000278	hsa-miR-221-3p	ENSG00000168385	44441	protein_coding	chr2	242292638	242292643	242292638	242292643	+	18	0	AGO1,AGO1-4,AGO2,AGO3	1	0	0	0	0	0	0	15
MIMAT0000278	hsa-miR-221-3p	ENSG00000101266	CSNK2A1	protein_coding	chr20	462340	462345	462339	462367	-	4	0	AGO1,AGO1-4,AGO2,AGO3	0	0	1	1	0	0	0	12
MIMAT0000278	hsa-miR-221-3p	ENSG00000125895	TMEM74B	protein_coding	chr20	1161285	1161290	1161285	1161290	-	2	0	AGO2	1	0	0	0	0	0	0	6
MIMAT0000278	hsa-miR-221-3p	ENSG00000101236	RNF24	protein_coding	chr20	3913925	3913932	3913925	3913932	-	1	0	AGO2	1	0	0	0	0	0	0	5
MIMAT0000278	hsa-miR-221-3p	ENSG00000125772	GPCPD1	protein_coding	chr20	5525359	5525364	5525359	5525364	-	3	0	AGO1-4,AGO2	1	0	0	0	0	0	0	8
MIMAT0000278	hsa-miR-221-3p	ENSG00000101311	FERMT1	protein_coding	chr20	6057424	6057429	6057424	6057429	-	1	0	AGO1-4	1	0	0	0	0	0	0	4
MIMAT0000278	hsa-miR-221-3p	ENSG00000089177	KIF16B	protein_coding	chr20	16252993	16252998	16252992	16253020	-	6	0	AGO1-4,AGO2	1	0	1	1	1	1	1	10
MIMAT0000278	hsa-miR-221-3p	ENSG00000178726	THBD	protein_coding	chr20	23026916	23026921	23026916	23026921	-	1	0	AGO1-4	1	0	0	0	0	0	0	7
MIMAT0000278	hsa-miR-221-3p	ENSG00000125810	CD93	protein_coding	chr20	23061336	23061341	23061336	23061341	-	1	0	AGO1-4	1	0	0	0	0	0	0	9
MIMAT0000278	hsa-miR-221-3p	ENSG00000100991	TRPC4AP	protein_coding	chr20	33590444	33590449	33590444	33590449	-	7	0	AGO1-4,AGO2	1	0	0	0	0	0	0	9
MIMAT0000278	hsa-miR-221-3p	ENSG00000101019	UQCC1	protein_coding	chr20	33890879	33890884	33890879	33890884	-	2	0	AGO2	1	0	0	0	0	0	0	10
MIMAT0000278	hsa-miR-221-3p	ENSG00000244005	NFS1	protein_coding	chr20	34257096	34257101	34257096	34257101	-	5	0	AGO1-4,AGO2	1	0	0	0	0	0	0	13
MIMAT0000278	hsa-miR-221-3p	ENSG00000124177	CHD6	protein_coding	chr20	40031502	40031507	40031501	40031523	-	2	0	AGO1-4,AGO2	1	0	0	0	1	0	0	14
MIMAT0000278	hsa-miR-221-3p	ENSG00000132824	SERINC3	protein_coding	chr20	43128334	43128339	43128333	43128355	-	12	0	AGO1,AGO1-4,AGO2	1	0	0	0	1	0	0	8
MIMAT0000278	hsa-miR-221-3p	ENSG00000101098	RIMS4	protein_coding	chr20	43380482	43380488	43380482	43380488	-	1	0	AGO1-4	1	0	1	0	0	0	1	11
MIMAT0000278	hsa-miR-221-3p	ENSG00000025772	TOMM34	protein_coding	chr20	43571390	43571395	43571390	43571395	-	3	0	AGO1-4,AGO2	1	0	0	0	0	0	0	5
MIMAT0000278	hsa-miR-221-3p	ENSG00000158480	SPATA2	protein_coding	chr20	48521327	48521333	48521326	48521348	-	12	0	AGO1-4,AGO2	1	0	1	0	1	0	1	9
MIMAT0000278	hsa-miR-221-3p	ENSG00000101096	NFATC2	protein_coding	chr20	50005306	50005313	50005306	50005313	-	2	0	AGO1-4	0	0	0	0	0	0	1	6
MIMAT0000278	hsa-miR-221-3p	ENSG00000054793	ATP9A	protein_coding	chr20	50217404	50217409	50217404	50217409	-	11	0	AGO1-4,AGO2	1	0	0	0	0	0	0	8
MIMAT0000278	hsa-miR-221-3p	ENSG00000019186	CYP24A1	protein_coding	chr20	52770952	52770957	52770952	52770957	-	1	0	AGO2	1	0	0	0	0	0	0	2
MIMAT0000278	hsa-miR-221-3p	ENSG00000101166	PRELID3B	protein_coding	chr20	57608861	57608866	57608861	57608866	-	7	0	AGO1-4,AGO2	1	0	0	0	0	0	0	11
MIMAT0000278	hsa-miR-221-3p	ENSG00000132825	PPP1R3D	protein_coding	chr20	58513501	58513506	58513501	58513506	-	1	0	AGO1-4	1	0	0	0	0	0	0	7
MIMAT0000278	hsa-miR-221-3p	ENSG00000101191	DIDO1	protein_coding	chr20	61518848	61518853	61518848	61518853	-	1	0	AGO2	1	0	0	0	0	0	0	9
MIMAT0000278	hsa-miR-221-3p	ENSG00000247315	ZCCHC3	protein_coding	chr20	279651	279656	279633	279657	+	14	0	AGO1-4,AGO2,AGO3	1	0	0	0	1	0	0	11
MIMAT0000278	hsa-miR-221-3p	ENSG00000125818	PSMF1	protein_coding	chr20	1148315	1148320	1148315	1148320	+	1	0	AGO1-4	1	0	1	0	0	0	0	7
MIMAT0000278	hsa-miR-221-3p	ENSG00000125834	STK35	protein_coding	chr20	2127385	2127390	2127385	2127390	+	4	0	AGO1-4,AGO2	1	0	0	0	0	0	0	7
MIMAT0000278	hsa-miR-221-3p	ENSG00000088826	SMOX	protein_coding	chr20	4168203	4168208	4168203	4168208	+	3	0	AGO1-4,AGO2	1	0	0	0	0	0	0	4
MIMAT0000278	hsa-miR-221-3p	ENSG00000101290	CDS2	protein_coding	chr20	5171784	5171790	5171768	5171791	+	12	0	AGO1-4,AGO2	1	0	0	0	1	0	0	11
MIMAT0000278	hsa-miR-221-3p	ENSG00000132639	SNAP25	protein_coding	chr20	10288013	10288035	10288007	10288035	+	2	0	AGO2	0	0	0	1	1	0	0	15
MIMAT0000278	hsa-miR-221-3p	ENSG00000132640	BTBD3	protein_coding	chr20	11905317	11905322	11905295	11905323	+	11	0	AGO1,AGO1-4,AGO2	1	0	1	1	0	1	0	13
MIMAT0000278	hsa-miR-221-3p	ENSG00000149474	KAT14	protein_coding	chr20	18168468	18168473	18168468	18168473	+	1	0	AGO2	1	0	0	0	0	0	0	12
MIMAT0000278	hsa-miR-221-3p	ENSG00000173404	INSM1	protein_coding	chr20	20350855	20350861	20350841	20350862	+	4	0	AGO1,AGO2	1	0	0	0	1	0	0	14
MIMAT0000278	hsa-miR-221-3p	ENSG00000100994	PYGB	protein_coding	chr20	25277774	25277779	25277774	25277779	+	3	0	AGO1-4,AGO2	1	0	0	0	0	0	0	3
MIMAT0000278	hsa-miR-221-3p	ENSG00000101346	POFUT1	protein_coding	chr20	30824044	30824049	30824044	30824049	+	4	0	AGO1-4,AGO2	1	0	0	0	0	0	0	8
MIMAT0000278	hsa-miR-221-3p	ENSG00000101350	KIF3B	protein_coding	chr20	30921117	30921123	30921102	30921124	+	3	0	AGO1-4,AGO2	1	0	0	0	1	0	0	10
MIMAT0000278	hsa-miR-221-3p	ENSG00000101367	MAPRE1	protein_coding	chr20	31436726	31436731	31436726	31436732	+	7	0	AGO1,AGO1-4	1	0	0	0	0	1	0	9
MIMAT0000278	hsa-miR-221-3p	ENSG00000131061	ZNF341	protein_coding	chr20	32379781	32379808	32379781	32379808	+	1	0	AGO2	0	0	0	0	1	0	0	4
MIMAT0000278	hsa-miR-221-3p	ENSG00000101421	CHMP4B	protein_coding	chr20	32441720	32441727	32441700	32441728	+	5	0	AGO1-4,AGO2	1	0	0	1	1	0	0	4
MIMAT0000278	hsa-miR-221-3p	ENSG00000078804	TP53INP2	protein_coding	chr20	33300308	33300313	33300308	33300314	+	2	1	AGO2	1	0	0	0	0	0	1	18
MIMAT0000278	hsa-miR-221-3p	ENSG00000025293	PHF20	protein_coding	chr20	34536187	34536192	34536187	34536192	+	1	0	AGO2	1	0	0	0	0	0	0	8
MIMAT0000278	hsa-miR-221-3p	ENSG00000101413	RPRD1B	protein_coding	chr20	36720292	36720297	36720274	36720298	+	6	0	AGO1-4,AGO2	1	0	0	0	1	0	0	9
MIMAT0000278	hsa-miR-221-3p	ENSG00000101447	FAM83D	protein_coding	chr20	37581577	37581582	37581577	37581582	+	3	0	AGO1-4,AGO2	1	0	0	0	0	0	0	6
MIMAT0000278	hsa-miR-221-3p	ENSG00000101452	DHX35	protein_coding	chr20	37667997	37668002	37667997	37668002	+	2	0	AGO1-4	1	0	0	0	0	0	0	6
MIMAT0000278	hsa-miR-221-3p	ENSG00000124181	PLCG1	protein_coding	chr20	39803580	39803585	39803580	39803585	+	3	0	AGO1-4,AGO2	1	0	0	0	0	0	0	11
MIMAT0000278	hsa-miR-221-3p	ENSG00000124120	TTPAL	protein_coding	chr20	43118957	43118962	43118957	43118962	+	10	0	AGO1-4,AGO2	1	0	0	0	0	0	0	9
MIMAT0000278	hsa-miR-221-3p	ENSG00000101109	STK4	protein_coding	chr20	43707378	43707383	43707378	43707383	+	1	0	AGO1-4	1	0	1	0	0	0	0	4
MIMAT0000278	hsa-miR-221-3p	ENSG00000196396	PTPN1	protein_coding	chr20	49200684	49200689	49200684	49200689	+	3	0	AGO1-4,AGO2	1	0	0	0	0	0	0	4
MIMAT0000278	hsa-miR-221-3p	ENSG00000124209	RAB22A	protein_coding	chr20	56942132	56942137	56942132	56942137	+	4	0	AGO1-4,AGO3	1	0	0	0	0	0	0	6
MIMAT0000278	hsa-miR-221-3p	ENSG00000124164	VAPB	protein_coding	chr20	57020561	57020566	57020539	57020567	+	27	0	AGO1,AGO1-4,AGO2,AGO3	1	0	1	1	1	1	1	12
MIMAT0000278	hsa-miR-221-3p	ENSG00000196227	FAM217B	protein_coding	chr20	58521558	58521564	58521545	58521565	+	5	0	AGO1-4,AGO2	1	0	0	0	1	0	0	7
MIMAT0000278	hsa-miR-221-3p	ENSG00000130703	OSBPL2	protein_coding	chr20	60869270	60869275	60869270	60869275	+	3	0	AGO1-4,AGO2	1	0	1	0	0	0	0	10
MIMAT0000278	hsa-miR-221-3p	ENSG00000101189	MRGBP	protein_coding	chr20	61431785	61431790	61431785	61431790	+	17	0	AGO1,AGO1-4,AGO2,AGO3	1	0	0	0	0	0	0	6
MIMAT0000278	hsa-miR-221-3p	ENSG00000101193	GID8	protein_coding	chr20	61577403	61577408	61577403	61577408	+	3	0	AGO1-4	1	0	0	0	0	0	0	10
MIMAT0000278	hsa-miR-221-3p	ENSG00000101152	DNAJC5	protein_coding	chr20	62563113	62563120	62563113	62563120	+	4	0	AGO1-4	1	0	0	0	0	0	0	7
MIMAT0000278	hsa-miR-221-3p	ENSG00000154642	C21orf91	protein_coding	chr21	19162482	19162487	19162482	19162487	-	7	0	AGO1-4,AGO2	1	0	0	0	0	0	0	5
MIMAT0000278	hsa-miR-221-3p	ENSG00000154736	ADAMTS5	protein_coding	chr21	28290433	28290438	28290433	28290438	-	5	0	AGO1-4,AGO2	1	0	0	0	0	0	0	11
MIMAT0000278	hsa-miR-221-3p	ENSG00000156299	TIAM1	protein_coding	chr21	32492538	32492544	32492537	32492558	-	4	0	AGO1-4,AGO2	1	0	0	0	1	0	0	7
MIMAT0000278	hsa-miR-221-3p	ENSG00000159086	PAXBP1	protein_coding	chr21	34106749	34106754	34106749	34106754	-	3	0	AGO1-4	1	0	0	0	0	0	0	9
MIMAT0000278	hsa-miR-221-3p	ENSG00000159200	RCAN1	protein_coding	chr21	35889907	35889912	35889907	35889912	-	6	0	AGO1-4	1	0	0	0	0	0	0	8
MIMAT0000278	hsa-miR-221-3p	ENSG00000157538	VPS26C	protein_coding	chr21	38597454	38597460	38597454	38597460	-	2	0	AGO1-4,AGO2	1	0	0	0	0	0	0	9
MIMAT0000278	hsa-miR-221-3p	ENSG00000185658	BRWD1	protein_coding	chr21	40558167	40558173	40558166	40558188	-	6	0	AGO1,AGO1-4,AGO2	1	0	0	0	1	0	1	13
MIMAT0000278	hsa-miR-221-3p	ENSG00000157617	C2CD2	protein_coding	chr21	43306104	43306109	43306104	43306109	-	1	0	AGO2	1	0	0	0	0	0	0	8
MIMAT0000278	hsa-miR-221-3p	ENSG00000160183	TMPRSS3	protein_coding	chr21	43792057	43792062	43792057	43792062	-	3	0	AGO1-4,AGO2	1	0	0	0	0	0	0	4
MIMAT0000278	hsa-miR-221-3p	ENSG00000160193	WDR4	protein_coding	chr21	44263299	44263305	44263298	44263318	-	3	0	AGO1-4	1	0	0	0	1	0	0	5
MIMAT0000278	hsa-miR-221-3p	ENSG00000184787	UBE2G2	protein_coding	chr21	46190882	46190887	46190882	46190887	-	3	0	AGO1-4,AGO2	1	0	0	0	0	0	0	8
MIMAT0000278	hsa-miR-221-3p	ENSG00000173638	SLC19A1	protein_coding	chr21	46935144	46935149	46935144	46935149	-	5	0	AGO1-4,AGO2	1	0	0	0	0	0	0	10
MIMAT0000278	hsa-miR-221-3p	ENSG00000154639	CXADR	protein_coding	chr21	18938289	18938295	18938275	18938296	+	1	0	AGO2	1	0	0	0	1	0	0	7
MIMAT0000278	hsa-miR-221-3p	ENSG00000154727	GABPA	protein_coding	chr21	27141832	27141837	27141832	27141837	+	2	0	AGO2	1	0	0	0	0	0	0	12
MIMAT0000278	hsa-miR-221-3p	ENSG00000205726	ITSN1	protein_coding	chr21	35138234	35138257	35138234	35138257	+	4	0	AGO1-4,AGO2	0	0	0	0	1	0	0	6
MIMAT0000278	hsa-miR-221-3p	ENSG00000198743	SLC5A3	protein_coding	chr21	35472881	35472887	35472881	35472887	+	1	0	AGO1-4	1	0	0	0	0	0	0	1
MIMAT0000278	hsa-miR-221-3p	ENSG00000159263	SIM2	protein_coding	chr21	38121151	38121157	38121134	38121158	+	3	1	AGO1,AGO2	1	0	0	0	1	0	0	10
MIMAT0000278	hsa-miR-221-3p	ENSG00000157540	DYRK1A	protein_coding	chr21	38884312	38884317	38884290	38884318	+	8	0	AGO1,AGO1-4,AGO2,AGO3	1	0	1	1	1	1	1	10
MIMAT0000278	hsa-miR-221-3p	ENSG00000157557	ETS2	protein_coding	chr21	40195939	40195944	40195920	40195945	+	6	0	AGO1-4,AGO2	1	0	0	0	1	1	1	6
MIMAT0000278	hsa-miR-221-3p	ENSG00000160209	PDXK	protein_coding	chr21	45179952	45179957	45179952	45179957	+	2	0	AGO1-4	1	0	0	0	0	0	0	2
MIMAT0000278	hsa-miR-221-3p	ENSG00000160218	TRAPPC10	protein_coding	chr21	45524240	45524245	45524240	45524245	+	2	0	AGO1-4	1	0	0	0	0	0	0	4
MIMAT0000278	hsa-miR-221-3p	ENSG00000280433	FP565260.7	protein_coding	chr21	45524240	45524245	45524240	45524245	+	2	0	AGO1-4	1	0	0	0	0	0	0	4
MIMAT0000278	hsa-miR-221-3p	ENSG00000241945	PWP2	protein_coding	chr21	45550803	45550809	45550803	45550809	+	2	0	AGO2	1	0	0	0	0	0	0	1
MIMAT0000278	hsa-miR-221-3p	ENSG00000275464	FP565260.1	protein_coding	chr21	45550803	45550809	45550803	45550809	+	2	0	AGO2	1	0	0	0	0	0	0	2
MIMAT0000278	hsa-miR-221-3p	ENSG00000160221	C21orf33	protein_coding	chr21	45565322	45565327	45565322	45565327	+	2	0	AGO1-4	1	0	0	0	0	0	0	1
MIMAT0000278	hsa-miR-221-3p	ENSG00000276612	FP565260.2	protein_coding	chr21	45565322	45565327	45565322	45565327	+	2	0	AGO1-4	1	0	0	0	0	0	0	2
MIMAT0000278	hsa-miR-221-3p	ENSG00000280071	FP565260.6	protein_coding	chr21	45565322	45565327	45565322	45565327	+	2	0	AGO1-4	1	0	0	0	0	0	0	7
MIMAT0000278	hsa-miR-221-3p	ENSG00000160233	LRRC3	protein_coding	chr21	45877886	45877891	45877886	45877891	+	1	0	AGO1-4	1	0	0	0	0	0	0	6
MIMAT0000278	hsa-miR-221-3p	ENSG00000197381	ADARB1	protein_coding	chr21	46642746	46642751	46642746	46642751	+	4	0	AGO2	1	0	0	0	0	0	0	7
MIMAT0000278	hsa-miR-221-3p	ENSG00000131100	ATP6V1E1	protein_coding	chr22	18075353	18075358	18075353	18075358	-	10	0	AGO1,AGO1-4,AGO2	1	0	0	0	0	0	0	5
MIMAT0000278	hsa-miR-221-3p	ENSG00000243156	MICAL3	protein_coding	chr22	18271235	18271240	18271235	18271240	-	1	0	AGO1-4	1	0	0	0	0	0	0	8
MIMAT0000278	hsa-miR-221-3p	ENSG00000100056	ESS2	protein_coding	chr22	19117869	19117893	19117869	19117893	-	3	0	AGO1,AGO2	0	0	0	0	1	0	0	5
MIMAT0000278	hsa-miR-221-3p	ENSG00000100075	SLC25A1	protein_coding	chr22	19163315	19163320	19163315	19163320	-	4	0	AGO1,AGO1-4	1	0	0	0	0	0	0	9
MIMAT0000278	hsa-miR-221-3p	ENSG00000242259	C22orf39	protein_coding	chr22	19428818	19428843	19428818	19428843	-	1	0	AGO2	0	0	0	0	1	0	0	16
MIMAT0000278	hsa-miR-221-3p	ENSG00000100030	MAPK1	protein_coding	chr22	22116066	22116071	22116066	22116071	-	2	0	AGO1-4,AGO2	1	0	0	0	0	0	0	6
MIMAT0000278	hsa-miR-221-3p	ENSG00000100034	PPM1F	protein_coding	chr22	22274087	22274092	22274087	22274092	-	1	0	AGO1-4	1	0	0	0	0	0	0	7
MIMAT0000278	hsa-miR-221-3p	ENSG00000275004	ZNF280B	protein_coding	chr22	22841613	22841618	22841613	22841618	-	1	0	AGO2	1	0	0	0	0	0	0	9
MIMAT0000278	hsa-miR-221-3p	ENSG00000187792	ZNF70	protein_coding	chr22	24084646	24084651	24084646	24084651	-	3	0	AGO1-4,AGO2	1	0	0	0	0	0	0	8
MIMAT0000278	hsa-miR-221-3p	ENSG00000180957	PITPNB	protein_coding	chr22	28249032	28249054	28249032	28249054	-	1	0	AGO2	0	0	0	0	1	0	0	5
MIMAT0000278	hsa-miR-221-3p	ENSG00000100219	XBP1	protein_coding	chr22	29190609	29190616	29190609	29190616	-	10	0	AGO1-4,AGO2	1	0	0	0	0	0	0	0
MIMAT0000278	hsa-miR-221-3p	ENSG00000099995	SF3A1	protein_coding	chr22	30728484	30728490	30728484	30728490	-	3	0	AGO1,AGO2	1	0	0	0	0	0	0	9
MIMAT0000278	hsa-miR-221-3p	ENSG00000099999	RNF215	protein_coding	chr22	30775263	30775270	30775263	30775270	-	1	0	AGO1-4	1	0	0	0	0	0	0	8
MIMAT0000278	hsa-miR-221-3p	ENSG00000167065	DUSP18	protein_coding	chr22	31058752	31058757	31058751	31058772	-	1	0	AGO1-4	1	1	1	0	0	0	0	6
MIMAT0000278	hsa-miR-221-3p	ENSG00000133422	MORC2	protein_coding	chr22	31322739	31322744	31322738	31322759	-	1	0	AGO2	1	1	0	0	0	0	0	8
MIMAT0000278	hsa-miR-221-3p	ENSG00000183530	PRR14L	protein_coding	chr22	32078378	32078384	32078378	32078384	-	7	0	AGO1-4,AGO2	0	0	0	0	0	0	1	9
MIMAT0000278	hsa-miR-221-3p	ENSG00000100320	RBFOX2	protein_coding	chr22	36136019	36136024	36136019	36136024	-	2	0	AGO1-4,AGO2	1	0	0	0	0	0	0	7
MIMAT0000278	hsa-miR-221-3p	ENSG00000128335	APOL2	protein_coding	chr22	36622994	36622999	36622994	36622999	-	1	0	AGO3	1	0	0	0	0	0	0	0
MIMAT0000278	hsa-miR-221-3p	ENSG00000100201	DDX17	protein_coding	chr22	38881188	38881193	38881188	38881193	-	13	0	AGO1,AGO1-4,AGO2	1	0	0	0	0	0	0	12
MIMAT0000278	hsa-miR-221-3p	ENSG00000100242	SUN2	protein_coding	chr22	39132011	39132016	39132010	39132038	-	12	0	AGO1,AGO1-4,AGO2	1	0	1	1	1	1	1	6
MIMAT0000278	hsa-miR-221-3p	ENSG00000100413	POLR3H	protein_coding	chr22	41922771	41922776	41922771	41922776	-	2	0	AGO1,AGO2	1	0	0	0	0	0	0	7
MIMAT0000278	hsa-miR-221-3p	ENSG00000100162	CENPM	protein_coding	chr22	42334862	42334867	42334862	42334867	-	2	0	AGO1-4,AGO2	1	0	0	0	0	0	0	5
MIMAT0000278	hsa-miR-221-3p	ENSG00000100227	POLDIP3	protein_coding	chr22	42980968	42980973	42980968	42980973	-	1	0	AGO1-4	1	0	0	0	0	0	0	6
MIMAT0000278	hsa-miR-221-3p	ENSG00000100304	TTLL12	protein_coding	chr22	43562840	43562845	43562840	43562845	-	6	0	AGO1,AGO1-4,AGO2	1	0	0	0	0	0	0	7
MIMAT0000278	hsa-miR-221-3p	ENSG00000188636	RTL6	protein_coding	chr22	44891642	44891647	44891642	44891647	-	1	0	AGO1-4	1	0	0	0	0	0	0	12
MIMAT0000278	hsa-miR-221-3p	ENSG00000100425	BRD1	protein_coding	chr22	50167615	50167621	50167614	50167635	-	18	0	AGO1,AGO1-4,AGO2,AGO3	1	0	1	0	1	0	0	13
MIMAT0000278	hsa-miR-221-3p	ENSG00000196576	PLXNB2	protein_coding	chr22	50713969	50713974	50713969	50713974	-	8	0	AGO1,AGO1-4,AGO2	1	0	0	0	0	0	0	4
MIMAT0000278	hsa-miR-221-3p	ENSG00000128191	DGCR8	protein_coding	chr22	20098589	20098596	20098589	20098596	+	1	0	AGO1-4	1	0	0	0	0	0	0	6
MIMAT0000278	hsa-miR-221-3p	ENSG00000185252	ZNF74	protein_coding	chr22	20762153	20762158	20762153	20762158	+	4	0	AGO2	1	0	0	0	0	0	0	16
MIMAT0000278	hsa-miR-221-3p	ENSG00000099940	SNAP29	protein_coding	chr22	21243585	21243591	21243568	21243592	+	3	0	AGO1,AGO2	1	0	0	0	1	0	1	7
MIMAT0000278	hsa-miR-221-3p	ENSG00000099942	CRKL	protein_coding	chr22	21305179	21305185	21305179	21305185	+	9	0	AGO1-4,AGO2	1	0	0	0	0	0	0	8
MIMAT0000278	hsa-miR-221-3p	ENSG00000100228	RAB36	protein_coding	chr22	23506080	23506085	23506080	23506085	+	1	0	AGO1-4	1	0	0	0	0	0	0	10
MIMAT0000278	hsa-miR-221-3p	ENSG00000159873	CCDC117	protein_coding	chr22	29184745	29184750	29184745	29184750	+	4	0	AGO1-4,AGO2	1	0	1	0	0	0	0	12
MIMAT0000278	hsa-miR-221-3p	ENSG00000183579	ZNRF3	protein_coding	chr22	29452026	29452031	29452026	29452031	+	2	0	AGO2	1	0	0	0	0	0	0	7
MIMAT0000278	hsa-miR-221-3p	ENSG00000100285	NEFH	protein_coding	chr22	29886928	29886934	29886912	29886935	+	2	0	AGO1-4	1	0	1	0	1	0	0	8
MIMAT0000278	hsa-miR-221-3p	ENSG00000100330	MTMR3	protein_coding	chr22	30426445	30426450	30426445	30426450	+	1	0	AGO1-4	1	0	0	0	0	0	0	10
MIMAT0000278	hsa-miR-221-3p	ENSG00000100003	SEC14L2	protein_coding	chr22	30818455	30818460	30818455	30818460	+	1	0	AGO1-4	1	0	0	0	0	0	0	6
MIMAT0000278	hsa-miR-221-3p	ENSG00000100225	FBXO7	protein_coding	chr22	32887064	32887086	32887064	32887086	+	2	0	AGO1-4	0	0	0	0	1	0	0	4
MIMAT0000278	hsa-miR-221-3p	ENSG00000100234	TIMP3	protein_coding	chr22	33257808	33257813	33257792	33257814	+	8	0	AGO1-4,AGO2	1	0	0	0	1	1	1	9
MIMAT0000278	hsa-miR-221-3p	ENSG00000189060	H1F0	protein_coding	chr22	38202825	38202831	38202825	38202831	+	4	0	AGO1-4	1	0	0	0	0	0	0	7
MIMAT0000278	hsa-miR-221-3p	ENSG00000100335	MIEF1	protein_coding	chr22	39911738	39911743	39911738	39911743	+	5	0	AGO1-4,AGO2	1	0	0	0	0	0	0	8
MIMAT0000278	hsa-miR-221-3p	ENSG00000128272	ATF4	protein_coding	chr22	39918651	39918656	39918651	39918656	+	22	0	AGO1,AGO1-4,AGO2	1	0	0	0	0	0	0	5
MIMAT0000278	hsa-miR-221-3p	ENSG00000100354	TNRC6B	protein_coding	chr22	40721362	40721390	40721362	40721390	+	1	0	AGO2	0	0	0	1	0	0	0	11
MIMAT0000278	hsa-miR-221-3p	ENSG00000100387	RBX1	protein_coding	chr22	41368619	41368624	41368603	41368625	+	11	3	AGO1-4,AGO2	1	0	0	0	1	0	0	5
MIMAT0000278	hsa-miR-221-3p	ENSG00000100403	ZC3H7B	protein_coding	chr22	41753906	41753913	41753888	41753914	+	3	0	AGO1-4,AGO2	1	0	0	0	1	0	0	7
MIMAT0000278	hsa-miR-221-3p	ENSG00000196419	XRCC6	protein_coding	chr22	42059979	42059984	42059979	42059984	+	14	0	AGO1,AGO1-4,AGO2	1	0	0	0	0	0	0	7
MIMAT0000278	hsa-miR-221-3p	ENSG00000198911	SREBF2	protein_coding	chr22	42302160	42302165	42302160	42302165	+	6	0	AGO1-4	1	0	0	0	0	0	0	8
MIMAT0000278	hsa-miR-221-3p	ENSG00000177096	FAM109B	protein_coding	chr22	42474761	42474766	42474761	42474766	+	1	0	AGO1	1	0	0	0	0	0	0	9
MIMAT0000278	hsa-miR-221-3p	ENSG00000077942	FBLN1	protein_coding	chr22	45996436	45996441	45996420	45996442	+	7	0	AGO1-4,AGO2	1	0	0	0	1	0	0	8
MIMAT0000278	hsa-miR-221-3p	ENSG00000100426	ZBED4	protein_coding	chr22	50282695	50282720	50282695	50282720	+	1	0	AGO2	0	0	0	0	1	0	0	10
MIMAT0000278	hsa-miR-221-3p	ENSG00000144560	VGLL4	protein_coding	chr3	11598150	11598155	11598149	11598177	-	11	0	AGO1,AGO1-4,AGO2	1	0	1	1	1	1	1	12
MIMAT0000278	hsa-miR-221-3p	ENSG00000131368	MRPS25	protein_coding	chr3	15093670	15093675	15093670	15093675	-	2	0	AGO2	1	0	0	0	0	0	0	8
MIMAT0000278	hsa-miR-221-3p	ENSG00000131381	RBSN	protein_coding	chr3	15111695	15111700	15111695	15111700	-	4	0	AGO1-4,AGO2	1	0	1	0	0	0	0	7
MIMAT0000278	hsa-miR-221-3p	ENSG00000206560	ANKRD28	protein_coding	chr3	15709388	15709416	15709388	15709416	-	1	0	AGO2	0	0	0	1	0	0	0	7
MIMAT0000278	hsa-miR-221-3p	ENSG00000182568	SATB1	protein_coding	chr3	18390276	18390281	18390275	18390297	-	3	0	AGO1,AGO2	1	0	0	0	1	0	0	10
MIMAT0000278	hsa-miR-221-3p	ENSG00000033867	SLC4A7	protein_coding	chr3	27416378	27416383	27416378	27416383	-	9	0	AGO1,AGO1-4,AGO2	1	0	1	0	0	0	0	5
MIMAT0000278	hsa-miR-221-3p	ENSG00000163512	AZI2	protein_coding	chr3	28363989	28363995	28363988	28364010	-	2	0	AGO1-4	0	0	1	0	1	0	1	9
MIMAT0000278	hsa-miR-221-3p	ENSG00000144645	OSBPL10	protein_coding	chr3	31700185	31700190	31700185	31700190	-	3	0	AGO1,AGO1-4,AGO2	0	0	1	0	0	0	0	4
MIMAT0000278	hsa-miR-221-3p	ENSG00000091317	CMTM6	protein_coding	chr3	32522911	32522916	32522911	32522916	-	1	0	AGO1-4	1	0	0	0	0	0	0	4
MIMAT0000278	hsa-miR-221-3p	ENSG00000173705	SUSD5	protein_coding	chr3	33192069	33192074	33192068	33192090	-	1	0	AGO2	1	0	0	0	1	1	0	12
MIMAT0000278	hsa-miR-221-3p	ENSG00000178567	EPM2AIP1	protein_coding	chr3	37030370	37030375	37030370	37030375	-	2	0	AGO1-4,AGO2	1	0	0	0	0	0	0	10
MIMAT0000278	hsa-miR-221-3p	ENSG00000093183	SEC22C	protein_coding	chr3	42591816	42591821	42591816	42591821	-	2	0	AGO2	0	0	1	0	0	0	0	12
MIMAT0000278	hsa-miR-221-3p	ENSG00000047849	MAP4	protein_coding	chr3	48015192	48015197	48015192	48015197	-	1	0	AGO1-4	1	0	0	0	0	0	0	4
MIMAT0000278	hsa-miR-221-3p	ENSG00000213672	NCKIPSD	protein_coding	chr3	48711311	48711316	48711311	48711316	-	7	0	AGO2	1	0	0	0	0	0	0	5
MIMAT0000278	hsa-miR-221-3p	ENSG00000114302	PRKAR2A	protein_coding	chr3	48786334	48786339	48786333	48786361	-	4	0	AGO1-4,AGO2	0	0	1	1	0	0	0	4
MIMAT0000278	hsa-miR-221-3p	ENSG00000114316	USP4	protein_coding	chr3	49315695	49315700	49315695	49315700	-	1	0	AGO2	1	0	0	0	0	0	0	1
MIMAT0000278	hsa-miR-221-3p	ENSG00000176095	IP6K1	protein_coding	chr3	49762229	49762234	49762229	49762236	-	3	0	AGO2	1	0	1	0	0	0	0	14
MIMAT0000278	hsa-miR-221-3p	ENSG00000068028	RASSF1	protein_coding	chr3	50367834	50367839	50367834	50367839	-	1	0	AGO1-4	1	0	0	0	0	0	0	5
MIMAT0000278	hsa-miR-221-3p	ENSG00000164091	WDR82	protein_coding	chr3	52289709	52289715	52289708	52289728	-	15	0	AGO1-4,AGO2,AGO3	1	0	0	0	1	0	0	6
MIMAT0000278	hsa-miR-221-3p	ENSG00000163946	FAM208A	protein_coding	chr3	56657593	56657615	56657593	56657615	-	1	0	AGO2	0	0	0	0	1	0	0	12
MIMAT0000278	hsa-miR-221-3p	ENSG00000168374	ARF4	protein_coding	chr3	57557543	57557548	57557542	57557570	-	12	0	AGO1-4,AGO2,AGO3	1	0	1	1	1	1	1	6
MIMAT0000278	hsa-miR-221-3p	ENSG00000163637	PRICKLE2	protein_coding	chr3	64081234	64081240	64081233	64081259	-	2	0	AGO1-4	1	0	0	0	1	0	0	12
MIMAT0000278	hsa-miR-221-3p	ENSG00000151276	MAGI1	protein_coding	chr3	65339981	65339986	65339981	65339986	-	5	0	AGO1-4,AGO2	1	0	0	0	0	0	0	10
MIMAT0000278	hsa-miR-221-3p	ENSG00000163378	EOGT	protein_coding	chr3	69024890	69024918	69024890	69024918	-	1	0	AGO2	0	0	0	1	0	0	0	6
MIMAT0000278	hsa-miR-221-3p	ENSG00000114861	FOXP1	protein_coding	chr3	71005583	71005588	71005582	71005610	-	7	0	AGO1-4,AGO2	1	0	1	1	1	1	1	7
MIMAT0000278	hsa-miR-221-3p	ENSG00000144736	SHQ1	protein_coding	chr3	72798905	72798912	72798904	72798926	-	1	0	AGO1-4	1	0	0	0	1	0	0	10
MIMAT0000278	hsa-miR-221-3p	ENSG00000114480	GBE1	protein_coding	chr3	81538902	81538907	81538901	81538926	-	7	0	AGO1-4,AGO2	1	0	0	0	1	0	0	6
MIMAT0000278	hsa-miR-221-3p	ENSG00000206538	VGLL3	protein_coding	chr3	86995793	86995798	86995793	86995798	-	1	0	AGO1-4	1	0	0	0	0	0	0	5
MIMAT0000278	hsa-miR-221-3p	ENSG00000163320	CGGBP1	protein_coding	chr3	88104003	88104008	88104003	88104008	-	1	0	AGO1-4	1	0	0	0	0	0	0	8
MIMAT0000278	hsa-miR-221-3p	ENSG00000080822	CLDND1	protein_coding	chr3	98234416	98234421	98234415	98234437	-	23	1	AGO1,AGO1-4,AGO2	1	0	0	0	1	1	0	2
MIMAT0000278	hsa-miR-221-3p	ENSG00000057019	DCBLD2	protein_coding	chr3	98514830	98514835	98514830	98514835	-	2	0	AGO2	1	0	1	0	0	0	0	3
MIMAT0000278	hsa-miR-221-3p	ENSG00000138468	SENP7	protein_coding	chr3	101043798	101043803	101043797	101043819	-	2	0	AGO1-4,AGO2	1	0	1	0	1	0	0	13
MIMAT0000278	hsa-miR-221-3p	ENSG00000114423	CBLB	protein_coding	chr3	105377423	105377428	105377423	105377428	-	3	0	AGO1-4,AGO2	1	0	0	0	0	0	0	9
MIMAT0000278	hsa-miR-221-3p	ENSG00000196776	CD47	protein_coding	chr3	107764327	107764332	107764327	107764332	-	2	0	AGO1-4,AGO2	1	0	1	0	0	0	0	2
MIMAT0000278	hsa-miR-221-3p	ENSG00000163507	CIP2A	protein_coding	chr3	108269456	108269461	108269455	108269477	-	1	0	AGO2	1	0	0	0	1	0	0	6
MIMAT0000278	hsa-miR-221-3p	ENSG00000163608	NEPRO	protein_coding	chr3	112723912	112723917	112723912	112723917	-	1	0	AGO1-4	1	0	0	0	0	0	0	8
MIMAT0000278	hsa-miR-221-3p	ENSG00000163611	SPICE1	protein_coding	chr3	113162690	113162695	113162690	113162695	-	1	0	AGO1-4	1	0	0	0	0	0	0	13
MIMAT0000278	hsa-miR-221-3p	ENSG00000176542	USF3	protein_coding	chr3	113368582	113368587	113368582	113368587	-	2	0	AGO1-4,AGO2	1	0	1	0	0	0	0	6
MIMAT0000278	hsa-miR-221-3p	ENSG00000163428	LRRC58	protein_coding	chr3	120047477	120047483	120047477	120047483	-	3	0	AGO1-4,AGO2	1	0	0	0	0	0	0	7
MIMAT0000278	hsa-miR-221-3p	ENSG00000114030	KPNA1	protein_coding	chr3	122144703	122144709	122144702	122144724	-	12	0	AGO1,AGO1-4,AGO2	1	0	0	0	1	0	1	7
MIMAT0000278	hsa-miR-221-3p	ENSG00000138496	PARP9	protein_coding	chr3	122254256	122254278	122254256	122254278	-	1	0	AGO2	0	0	0	0	1	0	0	2
MIMAT0000278	hsa-miR-221-3p	ENSG00000173706	HEG1	protein_coding	chr3	124684659	124684664	124684658	124684664	-	9	0	AGO1-4,AGO2	1	0	1	0	0	0	1	7
MIMAT0000278	hsa-miR-221-3p	ENSG00000163848	ZNF148	protein_coding	chr3	124946565	124946570	124946564	124946570	-	3	0	AGO1-4,AGO2	1	0	0	0	0	1	0	9
MIMAT0000278	hsa-miR-221-3p	ENSG00000114520	SNX4	protein_coding	chr3	125165821	125165826	125165820	125165842	-	26	0	AGO1,AGO1-4,AGO2,AGO3	1	0	1	0	1	1	1	15
MIMAT0000278	hsa-miR-221-3p	ENSG00000184897	H1FX	protein_coding	chr3	129033932	129033938	129033931	129033952	-	5	0	AGO1-4,AGO2	1	0	0	0	1	0	0	8
MIMAT0000278	hsa-miR-221-3p	ENSG00000004399	PLXND1	protein_coding	chr3	129274446	129274451	129274446	129274451	-	4	0	AGO1-4	1	0	0	0	0	0	0	7
MIMAT0000278	hsa-miR-221-3p	ENSG00000172765	TMCC1	protein_coding	chr3	129370097	129370102	129370096	129370124	-	16	0	AGO1,AGO1-4,AGO2,AGO3	1	0	1	1	1	1	1	9
MIMAT0000278	hsa-miR-221-3p	ENSG00000163781	TOPBP1	protein_coding	chr3	133319789	133319794	133319789	133319794	-	9	0	AGO1-4,AGO2	1	0	0	0	0	0	0	6
MIMAT0000278	hsa-miR-221-3p	ENSG00000174579	MSL2	protein_coding	chr3	135869451	135869456	135869450	135869478	-	3	0	AGO1-4,AGO2	1	0	0	1	1	1	1	9
MIMAT0000278	hsa-miR-221-3p	ENSG00000175066	GK5	protein_coding	chr3	141882162	141882167	141882162	141882167	-	1	0	AGO1-4	1	0	0	0	0	0	0	10
MIMAT0000278	hsa-miR-221-3p	ENSG00000114127	XRN1	protein_coding	chr3	142026126	142026131	142026126	142026131	-	2	0	AGO1-4,AGO2	1	0	0	0	0	0	0	1
MIMAT0000278	hsa-miR-221-3p	ENSG00000152952	PLOD2	protein_coding	chr3	145787341	145787346	145787340	145787362	-	8	0	AGO1-4,AGO2	1	0	0	0	1	0	0	5
MIMAT0000278	hsa-miR-221-3p	ENSG00000114698	PLSCR4	protein_coding	chr3	145911143	145911149	145911142	145911164	-	7	0	AGO1-4,AGO2	1	0	0	0	1	0	0	9
MIMAT0000278	hsa-miR-221-3p	ENSG00000188313	PLSCR1	protein_coding	chr3	146233734	146233739	146233734	146233739	-	5	0	AGO1-4,AGO2	1	0	0	0	0	0	0	3
MIMAT0000278	hsa-miR-221-3p	ENSG00000071794	HLTF	protein_coding	chr3	148749189	148749195	148749188	148749216	-	1	0	AGO2	1	0	1	1	1	0	0	10
MIMAT0000278	hsa-miR-221-3p	ENSG00000018408	WWTR1	protein_coding	chr3	149237972	149237977	149237972	149237977	-	1	0	AGO2	0	0	1	0	0	0	0	9
MIMAT0000278	hsa-miR-221-3p	ENSG00000070087	PFN2	protein_coding	chr3	149683560	149683565	149683560	149683565	-	7	0	AGO1-4,AGO2	1	0	0	0	0	0	0	10
MIMAT0000278	hsa-miR-221-3p	ENSG00000114850	SSR3	protein_coding	chr3	156258965	156258972	156258965	156258972	-	3	0	AGO1-4	1	0	0	0	0	0	0	6
MIMAT0000278	hsa-miR-221-3p	ENSG00000186432	KPNA4	protein_coding	chr3	160214479	160214484	160214479	160214484	-	2	0	AGO1-4	0	0	1	0	0	0	0	2
MIMAT0000278	hsa-miR-221-3p	ENSG00000114200	BCHE	protein_coding	chr3	165491072	165491078	165491071	165491093	-	1	0	AGO2	1	0	1	0	1	0	0	11
MIMAT0000278	hsa-miR-221-3p	ENSG00000114209	PDCD10	protein_coding	chr3	167401928	167401933	167401927	167401955	-	8	0	AGO1,AGO1-4,AGO2	1	0	1	1	1	1	1	3
MIMAT0000278	hsa-miR-221-3p	ENSG00000173889	PHC3	protein_coding	chr3	169813800	169813805	169813800	169813805	-	3	0	AGO1-4	1	0	0	0	0	0	0	9
MIMAT0000278	hsa-miR-221-3p	ENSG00000163577	EIF5A2	protein_coding	chr3	170610798	170610803	170610797	170610825	-	6	0	AGO1,AGO1-4,AGO2,AGO3	1	0	1	1	1	1	1	3
MIMAT0000278	hsa-miR-221-3p	ENSG00000177565	TBL1XR1	protein_coding	chr3	176738972	176738977	176738972	176738977	-	6	0	AGO1-4,AGO2	0	0	1	0	0	0	0	8
MIMAT0000278	hsa-miR-221-3p	ENSG00000114450	GNB4	protein_coding	chr3	179115946	179115951	179115946	179115951	-	1	0	AGO2	1	0	0	0	0	0	0	6
MIMAT0000278	hsa-miR-221-3p	ENSG00000043093	DCUN1D1	protein_coding	chr3	182660713	182660718	182660712	182660740	-	6	0	AGO1,AGO2	1	0	1	1	1	1	1	8
MIMAT0000278	hsa-miR-221-3p	ENSG00000114770	ABCC5	protein_coding	chr3	183638791	183638796	183638790	183638814	-	7	0	AGO1-4,AGO2	1	0	0	0	1	0	0	6
MIMAT0000278	hsa-miR-221-3p	ENSG00000187068	C3orf70	protein_coding	chr3	184800565	184800570	184800564	184800592	-	1	0	AGO2	1	0	0	1	1	1	1	14
MIMAT0000278	hsa-miR-221-3p	ENSG00000163900	TMEM41A	protein_coding	chr3	185209123	185209128	185209123	185209128	-	1	0	AGO2	1	0	0	0	0	0	0	3
MIMAT0000278	hsa-miR-221-3p	ENSG00000073792	IGF2BP2	protein_coding	chr3	185363279	185363284	185363278	185363306	-	5	0	AGO1,AGO2	1	0	1	1	1	1	1	1
MIMAT0000278	hsa-miR-221-3p	ENSG00000244405	ETV5	protein_coding	chr3	185764412	185764417	185764412	185764417	-	5	0	AGO1-4	1	0	0	0	0	0	0	6
MIMAT0000278	hsa-miR-221-3p	ENSG00000163347	CLDN1	protein_coding	chr3	190024970	190024975	190024970	190024975	-	2	0	AGO2	1	0	0	0	0	0	0	4
MIMAT0000278	hsa-miR-221-3p	ENSG00000041802	LSG1	protein_coding	chr3	194361992	194361997	194361992	194361997	-	2	0	AGO2	1	0	0	0	0	0	0	8
MIMAT0000278	hsa-miR-221-3p	ENSG00000184203	PPP1R2	protein_coding	chr3	195242924	195242930	195242923	195242946	-	2	0	AGO1-4,AGO2	1	0	1	0	1	0	0	3
MIMAT0000278	hsa-miR-221-3p	ENSG00000072274	TFRC	protein_coding	chr3	195778341	195778348	195778340	195778361	-	4	0	AGO1-4,AGO2	1	0	0	0	1	0	0	4
MIMAT0000278	hsa-miR-221-3p	ENSG00000145016	RUBCN	protein_coding	chr3	197400665	197400670	197400665	197400670	-	7	0	AGO1-4,AGO2	1	0	0	0	0	0	0	3
MIMAT0000278	hsa-miR-221-3p	ENSG00000150995	ITPR1	protein_coding	chr3	4888298	4888303	4888298	4888303	+	12	0	AGO1-4,AGO2	1	0	0	0	0	0	0	12
MIMAT0000278	hsa-miR-221-3p	ENSG00000134107	BHLHE40	protein_coding	chr3	5025653	5025658	5025653	5025658	+	1	0	AGO1-4	1	0	0	0	0	0	0	2
MIMAT0000278	hsa-miR-221-3p	ENSG00000134109	EDEM1	protein_coding	chr3	5260268	5260273	5260268	5260273	+	11	0	AGO1-4,AGO2	1	0	0	0	0	0	0	5
MIMAT0000278	hsa-miR-221-3p	ENSG00000168137	SETD5	protein_coding	chr3	9518099	9518104	9518099	9518104	+	23	0	AGO1,AGO1-4,AGO2,AGO3	1	0	0	0	0	0	0	10
MIMAT0000278	hsa-miR-221-3p	ENSG00000144554	FANCD2	protein_coding	chr3	10143455	10143460	10143438	10143461	+	2	0	AGO2	1	0	1	0	1	1	0	6
MIMAT0000278	hsa-miR-221-3p	ENSG00000254999	BRK1	protein_coding	chr3	10168706	10168712	10168694	10168713	+	8	0	AGO2	1	0	1	0	1	0	0	5
MIMAT0000278	hsa-miR-221-3p	ENSG00000197548	ATG7	protein_coding	chr3	11597984	11597990	11597984	11597990	+	3	0	AGO1-4,AGO2	0	0	0	0	0	0	1	4
MIMAT0000278	hsa-miR-221-3p	ENSG00000131389	SLC6A6	protein_coding	chr3	14526942	14526947	14526942	14526947	+	3	0	AGO1-4,AGO2	1	0	0	0	0	0	0	8
MIMAT0000278	hsa-miR-221-3p	ENSG00000177463	NR2C2	protein_coding	chr3	15085930	15085935	15085930	15085935	+	9	0	AGO1,AGO1-4,AGO2	1	0	0	0	0	0	0	9
MIMAT0000278	hsa-miR-221-3p	ENSG00000131375	CAPN7	protein_coding	chr3	15293420	15293426	15293405	15293427	+	7	0	AGO1,AGO1-4,AGO2	1	0	1	0	1	0	0	14
MIMAT0000278	hsa-miR-221-3p	ENSG00000144597	EAF1	protein_coding	chr3	15483265	15483270	15483265	15483270	+	4	0	AGO1-4	1	0	0	0	0	0	0	11
MIMAT0000278	hsa-miR-221-3p	ENSG00000154822	PLCL2	protein_coding	chr3	17131558	17131564	17131537	17131565	+	5	0	AGO2	1	0	1	1	1	0	1	11
MIMAT0000278	hsa-miR-221-3p	ENSG00000170293	CMTM8	protein_coding	chr3	32411639	32411644	32411623	32411645	+	2	0	AGO2	1	0	0	0	1	0	0	7
MIMAT0000278	hsa-miR-221-3p	ENSG00000170248	PDCD6IP	protein_coding	chr3	33910026	33910033	33910015	33910034	+	1	0	AGO1-4	1	0	0	0	1	0	0	4
MIMAT0000278	hsa-miR-221-3p	ENSG00000144681	STAC	protein_coding	chr3	36588161	36588167	36588140	36588168	+	3	0	AGO1-4	1	0	1	1	1	0	0	8
MIMAT0000278	hsa-miR-221-3p	ENSG00000144674	GOLGA4	protein_coding	chr3	37407681	37407687	37407664	37407688	+	6	0	AGO1-4,AGO2	1	0	0	0	1	0	0	7
MIMAT0000278	hsa-miR-221-3p	ENSG00000172939	OXSR1	protein_coding	chr3	38295061	38295066	38295061	38295066	+	2	0	AGO1-4,AGO2	1	0	0	0	0	0	0	7
MIMAT0000278	hsa-miR-221-3p	ENSG00000114739	ACVR2B	protein_coding	chr3	38527401	38527406	38527382	38527407	+	3	0	AGO1-4,AGO2	1	1	0	0	0	1	0	17
MIMAT0000278	hsa-miR-221-3p	ENSG00000114742	WDR48	protein_coding	chr3	39136631	39136636	39136631	39136636	+	3	0	AGO1-4,AGO2	1	0	0	0	0	0	0	12
MIMAT0000278	hsa-miR-221-3p	ENSG00000168036	CTNNB1	protein_coding	chr3	41281652	41281657	41281637	41281658	+	20	0	AGO1,AGO1-4,AGO2,AGO3	1	0	0	0	1	0	0	8
MIMAT0000278	hsa-miR-221-3p	ENSG00000114857	NKTR	protein_coding	chr3	42689365	42689370	42689365	42689370	+	3	0	AGO1-4,AGO2	1	0	0	0	0	0	0	9
MIMAT0000278	hsa-miR-221-3p	ENSG00000186448	ZNF197	protein_coding	chr3	44670645	44670667	44670645	44670667	+	1	0	AGO2	0	0	0	0	1	0	0	11
MIMAT0000278	hsa-miR-221-3p	ENSG00000163808	KIF15	protein_coding	chr3	44894499	44894504	44894499	44894504	+	1	0	AGO1-4	1	0	0	0	0	0	0	7
MIMAT0000278	hsa-miR-221-3p	ENSG00000211456	SACM1L	protein_coding	chr3	45785537	45785542	45785537	45785542	+	6	0	AGO1-4,AGO2	1	0	0	0	0	0	0	9
MIMAT0000278	hsa-miR-221-3p	ENSG00000114648	KLHL18	protein_coding	chr3	47387014	47387020	47386999	47387021	+	1	0	AGO2	1	0	0	0	1	0	1	7
MIMAT0000278	hsa-miR-221-3p	ENSG00000145022	TCTA	protein_coding	chr3	49453616	49453621	49453616	49453621	+	1	0	AGO1-4	1	0	0	0	0	0	0	7
MIMAT0000278	hsa-miR-221-3p	ENSG00000003756	RBM5	protein_coding	chr3	50156156	50156162	50156143	50156163	+	1	0	AGO1-4	1	0	1	0	1	0	0	10
MIMAT0000278	hsa-miR-221-3p	ENSG00000114353	GNAI2	protein_coding	chr3	50296613	50296618	50296591	50296619	+	10	0	AGO1-4,AGO2	1	0	0	1	1	1	1	4
MIMAT0000278	hsa-miR-221-3p	ENSG00000056736	IL17RB	protein_coding	chr3	53899491	53899497	53899470	53899498	+	2	0	AGO2	1	0	1	1	1	0	0	12
MIMAT0000278	hsa-miR-221-3p	ENSG00000157500	APPL1	protein_coding	chr3	57303837	57303842	57303837	57303842	+	6	0	AGO1-4,AGO2	1	0	0	0	0	0	0	10
MIMAT0000278	hsa-miR-221-3p	ENSG00000168301	KCTD6	protein_coding	chr3	58487921	58487926	58487905	58487927	+	2	0	AGO1-4	1	0	0	0	1	0	0	11
MIMAT0000278	hsa-miR-221-3p	ENSG00000163630	SYNPR	protein_coding	chr3	63601451	63601456	63601435	63601457	+	1	0	AGO2	1	0	1	0	1	0	0	5
MIMAT0000278	hsa-miR-221-3p	ENSG00000163376	KBTBD8	protein_coding	chr3	67059764	67059769	67059764	67059769	+	4	0	AGO1-4,AGO2	1	0	1	0	0	0	0	1
MIMAT0000278	hsa-miR-221-3p	ENSG00000144746	ARL6IP5	protein_coding	chr3	69154990	69154995	69154990	69154995	+	12	0	AGO1-4,AGO2	1	0	0	0	0	0	0	7
MIMAT0000278	hsa-miR-221-3p	ENSG00000187098	MITF	protein_coding	chr3	70016079	70016085	70016064	70016086	+	2	0	AGO2	1	0	0	0	1	0	1	10
MIMAT0000278	hsa-miR-221-3p	ENSG00000175161	CADM2	protein_coding	chr3	86116634	86116639	86116612	86116640	+	1	0	AGO2	1	0	1	1	0	0	0	14
MIMAT0000278	hsa-miR-221-3p	ENSG00000169379	ARL13B	protein_coding	chr3	93773876	93773883	93773876	93773883	+	3	0	AGO1-4,AGO2	1	0	0	0	0	0	0	10
MIMAT0000278	hsa-miR-221-3p	ENSG00000080200	CRYBG3	protein_coding	chr3	97662780	97662785	97662780	97662785	+	2	0	AGO1-4,AGO2	1	0	0	0	0	0	0	6
MIMAT0000278	hsa-miR-221-3p	ENSG00000114354	TFG	protein_coding	chr3	100467398	100467404	100467377	100467405	+	15	0	AGO1,AGO1-4,AGO2	1	0	1	1	1	0	0	7
MIMAT0000278	hsa-miR-221-3p	ENSG00000114439	BBX	protein_coding	chr3	107524613	107524618	107524613	107524618	+	2	0	AGO1-4,AGO2	1	0	0	0	0	0	0	7
MIMAT0000278	hsa-miR-221-3p	ENSG00000153767	GTF2E1	protein_coding	chr3	120501687	120501693	120501673	120501694	+	8	0	AGO1-4,AGO2	1	0	1	0	1	0	1	12
MIMAT0000278	hsa-miR-221-3p	ENSG00000075785	RAB7A	protein_coding	chr3	128533523	128533528	128533523	128533528	+	1	0	AGO1-4	1	0	0	0	0	0	0	1
MIMAT0000278	hsa-miR-221-3p	ENSG00000091527	CDV3	protein_coding	chr3	133308204	133308209	133308187	133308210	+	9	0	AGO1,AGO1-4,AGO2,AGO3	1	0	0	0	1	1	0	4
MIMAT0000278	hsa-miR-221-3p	ENSG00000158092	NCK1	protein_coding	chr3	136667321	136667326	136667321	136667326	+	1	0	AGO2	1	0	0	0	0	0	0	6
MIMAT0000278	hsa-miR-221-3p	ENSG00000158258	CLSTN2	protein_coding	chr3	140285327	140285332	140285327	140285332	+	1	0	AGO2	1	0	0	0	0	0	0	12
MIMAT0000278	hsa-miR-221-3p	ENSG00000114120	SLC25A36	protein_coding	chr3	140696477	140696483	140696464	140696484	+	7	0	AGO1-4,AGO2	1	0	0	0	1	0	0	14
MIMAT0000278	hsa-miR-221-3p	ENSG00000155893	PXYLP1	protein_coding	chr3	141012622	141012627	141012622	141012627	+	1	0	AGO1-4	1	0	0	0	0	0	0	14
MIMAT0000278	hsa-miR-221-3p	ENSG00000144935	TRPC1	protein_coding	chr3	142526243	142526249	142526228	142526250	+	1	0	AGO2	1	0	0	0	1	0	0	12
MIMAT0000278	hsa-miR-221-3p	ENSG00000163714	U2SURP	protein_coding	chr3	142775633	142775638	142775611	142775639	+	10	0	AGO1-4,AGO2	1	0	0	1	0	0	0	7
MIMAT0000278	hsa-miR-221-3p	ENSG00000198843	SELENOT	protein_coding	chr3	150348189	150348194	150348189	150348194	+	1	0	AGO1-4	1	0	0	0	0	0	0	5
MIMAT0000278	hsa-miR-221-3p	ENSG00000144893	MED12L	protein_coding	chr3	151152001	151152029	151152001	151152029	+	1	0	AGO1-4	0	0	0	1	0	0	0	5
MIMAT0000278	hsa-miR-221-3p	ENSG00000152601	MBNL1	protein_coding	chr3	152183144	152183149	152183144	152183149	+	12	0	AGO1,AGO1-4,AGO2	1	0	0	0	0	0	0	3
MIMAT0000278	hsa-miR-221-3p	ENSG00000196549	MME	protein_coding	chr3	154899298	154899304	154899298	154899304	+	3	0	AGO1-4	1	0	1	0	0	0	0	5
MIMAT0000278	hsa-miR-221-3p	ENSG00000163659	TIPARP	protein_coding	chr3	156422969	156422974	156422969	156422975	+	19	0	AGO1,AGO1-4,AGO2,AGO3	1	0	0	0	0	1	1	1
MIMAT0000278	hsa-miR-221-3p	ENSG00000151967	SCHIP1	protein_coding	chr3	159614983	159614988	159614983	159614988	+	8	0	AGO1-4,AGO2	1	0	0	0	0	0	0	10
MIMAT0000278	hsa-miR-221-3p	ENSG00000283154	IQCJ-SCHIP1	protein_coding	chr3	159614983	159614988	159614983	159614988	+	8	0	AGO1-4,AGO2	1	0	0	0	0	0	0	0
MIMAT0000278	hsa-miR-221-3p	ENSG00000008952	SEC62	protein_coding	chr3	169710937	169710942	169710915	169710943	+	8	0	AGO2	1	0	1	1	0	1	1	7
MIMAT0000278	hsa-miR-221-3p	ENSG00000013297	CLDN11	protein_coding	chr3	170151004	170151010	170151004	170151010	+	9	0	AGO1-4	1	0	0	0	0	0	0	5
MIMAT0000278	hsa-miR-221-3p	ENSG00000075420	FNDC3B	protein_coding	chr3	172117043	172117048	172117043	172117049	+	19	0	AGO1-4,AGO2	1	0	0	0	0	0	1	5
MIMAT0000278	hsa-miR-221-3p	ENSG00000114346	ECT2	protein_coding	chr3	172538718	172538723	172538718	172538723	+	2	0	AGO2	1	0	0	0	0	0	0	6
MIMAT0000278	hsa-miR-221-3p	ENSG00000136521	NDUFB5	protein_coding	chr3	179342060	179342065	179342046	179342066	+	5	2	AGO1-4,AGO2	1	0	0	0	1	0	0	8
MIMAT0000278	hsa-miR-221-3p	ENSG00000176597	B3GNT5	protein_coding	chr3	182989298	182989304	182989282	182989305	+	1	0	AGO2	1	0	0	0	1	0	0	1
MIMAT0000278	hsa-miR-221-3p	ENSG00000114796	KLHL24	protein_coding	chr3	183402165	183402170	183402165	183402171	+	1	0	AGO2	1	0	0	0	0	0	1	11
MIMAT0000278	hsa-miR-221-3p	ENSG00000163872	YEATS2	protein_coding	chr3	183529122	183529129	183529122	183529129	+	1	0	AGO1-4	1	0	0	0	0	0	0	7
MIMAT0000278	hsa-miR-221-3p	ENSG00000145012	LPP	protein_coding	chr3	188598521	188598527	188598521	188598527	+	4	0	AGO1-4	0	0	1	0	0	0	0	12
MIMAT0000278	hsa-miR-221-3p	ENSG00000073282	TP63	protein_coding	chr3	189612508	189612513	189612508	189612513	+	2	0	AGO1-4	1	0	0	0	0	0	0	1
MIMAT0000278	hsa-miR-221-3p	ENSG00000196083	IL1RAP	protein_coding	chr3	190347506	190347512	190347489	190347513	+	1	0	AGO1-4	1	0	1	0	1	0	0	3
MIMAT0000278	hsa-miR-221-3p	ENSG00000152492	CCDC50	protein_coding	chr3	191109747	191109753	191109726	191109754	+	7	0	AGO1-4,AGO2	1	0	1	1	0	0	0	8
MIMAT0000278	hsa-miR-221-3p	ENSG00000180370	PAK2	protein_coding	chr3	196555769	196555775	196555752	196555776	+	9	0	AGO1-4,AGO2	1	0	0	0	1	0	0	6
MIMAT0000278	hsa-miR-221-3p	ENSG00000122068	FYTTD1	protein_coding	chr3	197509607	197509613	197509592	197509614	+	4	0	AGO1-4,AGO2	1	0	0	0	1	0	0	3
MIMAT0000278	hsa-miR-221-3p	ENSG00000168936	TMEM129	protein_coding	chr4	1717718	1717723	1717718	1717723	-	5	0	AGO1-4,AGO2	1	0	0	0	0	0	0	9
MIMAT0000278	hsa-miR-221-3p	ENSG00000214367	HAUS3	protein_coding	chr4	2232260	2232265	2232260	2232265	-	2	0	AGO1,AGO2	1	0	0	0	0	0	0	10
MIMAT0000278	hsa-miR-221-3p	ENSG00000123933	MXD4	protein_coding	chr4	2250540	2250545	2250540	2250545	-	1	0	AGO1-4	1	0	0	0	0	0	0	12
MIMAT0000278	hsa-miR-221-3p	ENSG00000196526	AFAP1	protein_coding	chr4	7760992	7760999	7760992	7760999	-	4	0	AGO1-4	1	0	0	0	0	0	0	7
MIMAT0000278	hsa-miR-221-3p	ENSG00000038219	BOD1L1	protein_coding	chr4	13616400	13616428	13616400	13616428	-	4	0	AGO1-4,AGO2	0	0	0	1	0	0	0	4
MIMAT0000278	hsa-miR-221-3p	ENSG00000109606	DHX15	protein_coding	chr4	24529350	24529355	24529349	24529371	-	12	0	AGO1,AGO1-4,AGO2	1	0	0	0	1	0	0	8
MIMAT0000278	hsa-miR-221-3p	ENSG00000047365	ARAP2	protein_coding	chr4	36068209	36068215	36068208	36068232	-	4	0	AGO1-4,AGO2,AGO3	1	0	1	0	1	0	0	3
MIMAT0000278	hsa-miR-221-3p	ENSG00000135605	TEC	protein_coding	chr4	48139153	48139158	48139153	48139158	-	2	0	AGO1-4	1	0	0	0	0	0	0	6
MIMAT0000278	hsa-miR-221-3p	ENSG00000128052	KDR	protein_coding	chr4	55944714	55944720	55944713	55944741	-	1	0	AGO2	1	0	1	1	1	0	1	11
MIMAT0000278	hsa-miR-221-3p	ENSG00000145241	CENPC	protein_coding	chr4	68338119	68338124	68338119	68338124	-	1	0	AGO1-4	1	0	0	0	0	0	0	9
MIMAT0000278	hsa-miR-221-3p	ENSG00000083896	YTHDC1	protein_coding	chr4	69179342	69179347	69179341	69179347	-	6	0	AGO1-4,AGO2	1	0	0	0	0	0	1	9
MIMAT0000278	hsa-miR-221-3p	ENSG00000132466	ANKRD17	protein_coding	chr4	73941288	73941293	73941288	73941293	-	2	0	AGO1-4,AGO2	1	0	0	0	0	0	0	9
MIMAT0000278	hsa-miR-221-3p	ENSG00000138757	G3BP2	protein_coding	chr4	76569109	76569114	76569109	76569114	-	8	0	AGO1-4,AGO2	1	0	0	0	0	0	0	7
MIMAT0000278	hsa-miR-221-3p	ENSG00000138760	SCARB2	protein_coding	chr4	77079987	77079993	77079986	77080014	-	5	0	AGO1-4,AGO2	1	0	1	1	1	0	0	10
MIMAT0000278	hsa-miR-221-3p	ENSG00000138767	CNOT6L	protein_coding	chr4	78635057	78635062	78635057	78635062	-	1	0	AGO1-4	1	0	0	0	0	0	0	10
MIMAT0000278	hsa-miR-221-3p	ENSG00000163291	PAQR3	protein_coding	chr4	79840534	79840539	79840534	79840539	-	5	0	AGO1-4,AGO2	1	0	0	0	0	0	0	9
MIMAT0000278	hsa-miR-221-3p	ENSG00000138668	HNRNPD	protein_coding	chr4	83274746	83274751	83274745	83274767	-	3	0	AGO1,AGO2,AGO3	1	0	1	0	1	1	0	4
MIMAT0000278	hsa-miR-221-3p	ENSG00000145284	SCD5	protein_coding	chr4	83551007	83551013	83551006	83551034	-	4	0	AGO1,AGO2	1	0	1	1	1	0	1	10
MIMAT0000278	hsa-miR-221-3p	ENSG00000163625	WDFY3	protein_coding	chr4	85591912	85591917	85591912	85591917	-	1	0	AGO1-4	1	0	0	0	0	0	0	14
MIMAT0000278	hsa-miR-221-3p	ENSG00000145332	KLHL8	protein_coding	chr4	88082897	88082902	88082897	88082902	-	7	0	AGO1-4,AGO2	1	0	0	0	0	0	0	10
MIMAT0000278	hsa-miR-221-3p	ENSG00000118777	ABCG2	protein_coding	chr4	89012307	89012312	89012307	89012312	-	1	0	AGO1-4	1	0	0	0	0	0	0	9
MIMAT0000278	hsa-miR-221-3p	ENSG00000177432	NAP1L5	protein_coding	chr4	89617437	89617442	89617436	89617464	-	2	0	AGO1-4,AGO2	1	0	1	1	0	0	0	11
MIMAT0000278	hsa-miR-221-3p	ENSG00000138640	FAM13A	protein_coding	chr4	89648650	89648655	89648649	89648672	-	2	0	AGO2	1	0	1	0	1	1	0	14
MIMAT0000278	hsa-miR-221-3p	ENSG00000168785	TSPAN5	protein_coding	chr4	99393442	99393447	99393442	99393447	-	2	0	AGO2	1	0	0	0	0	0	0	4
MIMAT0000278	hsa-miR-221-3p	ENSG00000197894	ADH5	protein_coding	chr4	99992626	99992631	99992626	99992631	-	1	0	AGO2	1	0	0	0	0	0	0	9
MIMAT0000278	hsa-miR-221-3p	ENSG00000164031	DNAJB14	protein_coding	chr4	100821905	100821910	100821904	100821926	-	3	0	AGO2	1	0	0	0	1	0	0	4
MIMAT0000278	hsa-miR-221-3p	ENSG00000138821	SLC39A8	protein_coding	chr4	103182934	103182940	103182933	103182955	-	4	1	AGO1-4,AGO2	1	0	0	0	1	0	0	10
MIMAT0000278	hsa-miR-221-3p	ENSG00000109332	UBE2D3	protein_coding	chr4	103717517	103717524	103717517	103717524	-	7	0	AGO1-4,AGO2	1	0	0	0	0	0	0	4
MIMAT0000278	hsa-miR-221-3p	ENSG00000155011	DKK2	protein_coding	chr4	107843047	107843069	107843047	107843069	-	1	0	AGO2	0	0	0	0	1	0	0	8
MIMAT0000278	hsa-miR-221-3p	ENSG00000138801	PAPSS1	protein_coding	chr4	108534982	108534987	108534981	108535003	-	2	0	AGO1-4,AGO2	1	0	0	0	1	0	0	6
MIMAT0000278	hsa-miR-221-3p	ENSG00000145365	TIFA	protein_coding	chr4	113197995	113198000	113197995	113198000	-	4	0	AGO1-4,AGO2	1	0	0	0	0	0	0	11
MIMAT0000278	hsa-miR-221-3p	ENSG00000138738	PRDM5	protein_coding	chr4	121758805	121758811	121758805	121758811	-	1	0	AGO2	0	0	1	0	0	0	0	12
MIMAT0000278	hsa-miR-221-3p	ENSG00000151458	ANKRD50	protein_coding	chr4	125587333	125587338	125587333	125587338	-	2	0	AGO1-4,AGO2	1	0	0	0	0	0	0	7
MIMAT0000278	hsa-miR-221-3p	ENSG00000151466	SCLT1	protein_coding	chr4	129957947	129957952	129957946	129957968	-	1	0	AGO2	0	0	1	0	1	0	0	5
MIMAT0000278	hsa-miR-221-3p	ENSG00000151012	SLC7A11	protein_coding	chr4	139089880	139089885	139089880	139089885	-	2	0	AGO2	1	0	0	0	0	0	0	6
MIMAT0000278	hsa-miR-221-3p	ENSG00000109390	NDUFC1	protein_coding	chr4	140211222	140211227	140211222	140211227	-	11	0	AGO1-4,AGO2	1	0	0	0	0	0	0	5
MIMAT0000278	hsa-miR-221-3p	ENSG00000145391	SETD7	protein_coding	chr4	140431322	140431327	140431322	140431327	-	1	0	AGO1	1	0	0	0	0	0	0	8
MIMAT0000278	hsa-miR-221-3p	ENSG00000153132	CLGN	protein_coding	chr4	141310068	141310074	141310067	141310089	-	3	0	AGO1-4,AGO2	1	0	1	0	1	0	0	12
MIMAT0000278	hsa-miR-221-3p	ENSG00000170153	RNF150	protein_coding	chr4	141786736	141786741	141786736	141786741	-	1	0	AGO2	1	0	0	0	0	0	0	14
MIMAT0000278	hsa-miR-221-3p	ENSG00000109452	INPP4B	protein_coding	chr4	142945524	142945529	142945523	142945551	-	1	0	AGO2	0	0	1	1	0	0	0	6
MIMAT0000278	hsa-miR-221-3p	ENSG00000164164	OTUD4	protein_coding	chr4	146054916	146054921	146054915	146054943	-	5	0	AGO1-4	1	0	1	1	0	0	0	3
MIMAT0000278	hsa-miR-221-3p	ENSG00000120519	SLC10A7	protein_coding	chr4	147177619	147177624	147177619	147177624	-	6	0	AGO1-4,AGO2	1	0	0	0	0	0	0	6
MIMAT0000278	hsa-miR-221-3p	ENSG00000145423	SFRP2	protein_coding	chr4	154701867	154701872	154701867	154701872	-	2	0	AGO2	1	0	0	0	0	0	0	8
MIMAT0000278	hsa-miR-221-3p	ENSG00000171560	FGA	protein_coding	chr4	155505139	155505144	155505139	155505144	-	2	0	AGO1-4,AGO2	1	0	0	0	0	0	0	8
MIMAT0000278	hsa-miR-221-3p	ENSG00000164114	MAP9	protein_coding	chr4	156264090	156264095	156264090	156264095	-	1	0	AGO2	1	0	1	0	0	0	0	12
MIMAT0000278	hsa-miR-221-3p	ENSG00000196104	SPOCK3	protein_coding	chr4	167654875	167654880	167654874	167654896	-	1	0	AGO2	1	0	0	0	1	0	0	11
MIMAT0000278	hsa-miR-221-3p	ENSG00000145439	CBR4	protein_coding	chr4	169910916	169910921	169910916	169910921	-	7	0	AGO1-4,AGO2	1	0	1	0	0	0	0	12
MIMAT0000278	hsa-miR-221-3p	ENSG00000164104	HMGB2	protein_coding	chr4	174253053	174253058	174253053	174253058	-	48	0	AGO1,AGO1-4,AGO2,AGO3,AGO4	1	0	0	0	0	0	0	4
MIMAT0000278	hsa-miR-221-3p	ENSG00000164117	FBXO8	protein_coding	chr4	175158467	175158472	175158467	175158472	-	3	0	AGO2	1	0	0	0	0	0	0	8
MIMAT0000278	hsa-miR-221-3p	ENSG00000150625	GPM6A	protein_coding	chr4	176554216	176554221	176554215	176554243	-	1	0	AGO2	1	0	0	1	0	1	1	13
MIMAT0000278	hsa-miR-221-3p	ENSG00000168310	IRF2	protein_coding	chr4	185308934	185308939	185308933	185308961	-	5	0	AGO1-4,AGO2	1	0	1	1	1	1	1	2
MIMAT0000278	hsa-miR-221-3p	ENSG00000164305	CASP3	protein_coding	chr4	185549270	185549275	185549269	185549292	-	20	0	AGO1,AGO1-4,AGO2	1	0	0	0	1	0	0	2
MIMAT0000278	hsa-miR-221-3p	ENSG00000133256	PDE6B	protein_coding	chr4	664365	664370	664365	664370	+	2	0	AGO1-4	1	0	0	0	0	0	0	11
MIMAT0000278	hsa-miR-221-3p	ENSG00000185619	PCGF3	protein_coding	chr4	761862	761867	761862	761867	+	8	0	AGO1-4,AGO2	1	0	0	0	0	0	0	11
MIMAT0000278	hsa-miR-221-3p	ENSG00000109685	NSD2	protein_coding	chr4	1941807	1941812	1941807	1941812	+	1	0	AGO1-4	1	0	0	0	0	0	0	9
MIMAT0000278	hsa-miR-221-3p	ENSG00000063978	RNF4	protein_coding	chr4	2516207	2516212	2516186	2516213	+	30	0	AGO1,AGO1-4,AGO2,AGO3	1	0	1	0	1	1	1	6
MIMAT0000278	hsa-miR-221-3p	ENSG00000125386	FAM193A	protein_coding	chr4	2734100	2734105	2734100	2734105	+	1	0	AGO1-4	1	0	0	0	0	0	0	12
MIMAT0000278	hsa-miR-221-3p	ENSG00000087274	ADD1	protein_coding	chr4	2930393	2930398	2930393	2930398	+	4	1	AGO1-4	1	0	0	0	0	0	0	7
MIMAT0000278	hsa-miR-221-3p	ENSG00000197386	HTT	protein_coding	chr4	3242487	3242492	3242487	3242492	+	3	0	AGO1-4,AGO2	1	0	0	0	0	0	0	1
MIMAT0000278	hsa-miR-221-3p	ENSG00000072840	EVC	protein_coding	chr4	5815455	5815460	5815455	5815460	+	1	0	AGO1-4	1	0	0	0	0	0	0	8
MIMAT0000278	hsa-miR-221-3p	ENSG00000109501	WFS1	protein_coding	chr4	6304372	6304377	6304372	6304377	+	1	1	AGO1-4	1	0	0	0	0	0	0	10
MIMAT0000278	hsa-miR-221-3p	ENSG00000170871	KIAA0232	protein_coding	chr4	6884592	6884597	6884592	6884597	+	1	0	AGO2	1	0	0	0	0	0	0	11
MIMAT0000278	hsa-miR-221-3p	ENSG00000173011	TADA2B	protein_coding	chr4	7057307	7057312	7057307	7057312	+	5	0	AGO1-4,AGO2	1	0	0	0	0	0	0	10
MIMAT0000278	hsa-miR-221-3p	ENSG00000118579	MED28	protein_coding	chr4	17625613	17625618	17625613	17625618	+	6	0	AGO1-4,AGO2	1	0	0	0	0	0	0	10
MIMAT0000278	hsa-miR-221-3p	ENSG00000168214	RBPJ	protein_coding	chr4	26435329	26435334	26435329	26435334	+	1	0	AGO2	0	0	1	0	0	0	0	4
MIMAT0000278	hsa-miR-221-3p	ENSG00000109680	TBC1D19	protein_coding	chr4	26756896	26756924	26756896	26756924	+	1	0	AGO2	0	0	0	1	0	0	0	11
MIMAT0000278	hsa-miR-221-3p	ENSG00000169851	PCDH7	protein_coding	chr4	31147648	31147653	31147648	31147653	+	2	0	AGO2	1	0	0	0	0	0	0	3
MIMAT0000278	hsa-miR-221-3p	ENSG00000109787	KLF3	protein_coding	chr4	38700204	38700210	38700186	38700211	+	4	0	AGO1-4,AGO2	1	0	0	0	1	0	0	7
MIMAT0000278	hsa-miR-221-3p	ENSG00000078140	UBE2K	protein_coding	chr4	39783199	39783221	39783199	39783221	+	5	0	AGO2	0	0	0	0	1	0	0	4
MIMAT0000278	hsa-miR-221-3p	ENSG00000078177	N4BP2	protein_coding	chr4	40104218	40104221	40104193	40104246	+	1	0	AGO1-4	0	0	0	2	0	0	0	12
MIMAT0000278	hsa-miR-221-3p	ENSG00000179299	NSUN7	protein_coding	chr4	40811851	40811856	40811837	40811857	+	2	0	AGO1-4,AGO2	1	0	1	0	1	0	0	9
MIMAT0000278	hsa-miR-221-3p	ENSG00000151806	GUF1	protein_coding	chr4	44684351	44684374	44684351	44684374	+	2	0	AGO1,AGO2	0	0	0	0	1	0	0	9
MIMAT0000278	hsa-miR-221-3p	ENSG00000145246	ATP10D	protein_coding	chr4	47594759	47594764	47594759	47594764	+	1	0	AGO2	1	0	0	0	0	0	0	4
MIMAT0000278	hsa-miR-221-3p	ENSG00000109171	SLAIN2	protein_coding	chr4	48424733	48424739	48424733	48424739	+	1	0	AGO1-4	1	0	0	0	0	0	1	5
MIMAT0000278	hsa-miR-221-3p	ENSG00000109184	DCUN1D4	protein_coding	chr4	52780151	52780157	52780136	52780158	+	5	0	AGO1-4,AGO2	1	0	1	0	1	0	1	13
MIMAT0000278	hsa-miR-221-3p	ENSG00000157404	KIT	protein_coding	chr4	55605753	55605759	55605732	55605760	+	7	0	AGO2,AGO3	1	0	1	1	1	0	0	14
MIMAT0000278	hsa-miR-221-3p	ENSG00000134851	TMEM165	protein_coding	chr4	56291720	56291725	56291704	56291726	+	14	0	AGO1,AGO1-4,AGO2	1	0	0	0	1	1	0	6
MIMAT0000278	hsa-miR-221-3p	ENSG00000128050	PAICS	protein_coding	chr4	57326447	57326452	57326447	57326452	+	5	0	AGO1-4,AGO2	1	0	0	0	0	0	0	9
MIMAT0000278	hsa-miR-221-3p	ENSG00000126550	HTN1	protein_coding	chr4	70921413	70921419	70921392	70921420	+	1	0	AGO1-4	0	0	1	1	0	0	0	0
MIMAT0000278	hsa-miR-221-3p	ENSG00000173542	MOB1B	protein_coding	chr4	71852628	71852633	71852628	71852633	+	6	0	AGO1,AGO1-4	1	0	0	0	0	0	0	9
MIMAT0000278	hsa-miR-221-3p	ENSG00000080493	SLC4A4	protein_coding	chr4	72434188	72434193	72434188	72434194	+	2	0	AGO2	1	0	1	0	0	1	1	8
MIMAT0000278	hsa-miR-221-3p	ENSG00000138764	CCNG2	protein_coding	chr4	78087396	78087403	78087396	78087403	+	5	0	AGO1-4,AGO2	1	0	0	0	0	0	0	8
MIMAT0000278	hsa-miR-221-3p	ENSG00000138772	ANXA3	protein_coding	chr4	79531452	79531458	79531431	79531459	+	1	0	AGO2	1	0	1	1	1	0	0	2
MIMAT0000278	hsa-miR-221-3p	ENSG00000138756	BMP2K	protein_coding	chr4	79834164	79834170	79834164	79834170	+	1	0	AGO2	0	0	1	0	0	0	0	2
MIMAT0000278	hsa-miR-221-3p	ENSG00000138675	FGF5	protein_coding	chr4	81210576	81210582	81210561	81210583	+	1	0	AGO1-4	1	0	1	0	1	0	0	4
MIMAT0000278	hsa-miR-221-3p	ENSG00000163624	CDS1	protein_coding	chr4	85572067	85572089	85572067	85572089	+	2	0	AGO2	0	0	0	0	1	0	0	10
MIMAT0000278	hsa-miR-221-3p	ENSG00000172493	AFF1	protein_coding	chr4	88058851	88058856	88058851	88058856	+	1	0	AGO1-4	1	0	0	0	0	0	0	9
MIMAT0000278	hsa-miR-221-3p	ENSG00000184305	CCSER1	protein_coding	chr4	91230406	91230429	91230406	91230429	+	2	0	AGO1-4,AGO2	0	1	0	0	1	0	0	9
MIMAT0000278	hsa-miR-221-3p	ENSG00000168743	NPNT	protein_coding	chr4	106890468	106890473	106890468	106890473	+	4	0	AGO1-4,AGO2	1	0	0	0	0	0	0	5
MIMAT0000278	hsa-miR-221-3p	ENSG00000138802	SEC24B	protein_coding	chr4	110461126	110461132	110461105	110461133	+	2	0	AGO1-4,AGO2	1	0	1	1	1	0	0	8
MIMAT0000278	hsa-miR-221-3p	ENSG00000138660	AP1AR	protein_coding	chr4	113190989	113190994	113190989	113190994	+	1	0	AGO2	1	0	0	0	0	0	0	8
MIMAT0000278	hsa-miR-221-3p	ENSG00000164100	NDST3	protein_coding	chr4	119177295	119177323	119177295	119177323	+	1	0	AGO1-4	0	0	0	1	0	0	0	6
MIMAT0000278	hsa-miR-221-3p	ENSG00000145390	USP53	protein_coding	chr4	120215780	120215786	120215759	120215787	+	5	0	AGO1-4,AGO2	1	0	1	1	1	0	0	2
MIMAT0000278	hsa-miR-221-3p	ENSG00000138688	KIAA1109	protein_coding	chr4	123175399	123175422	123175399	123175422	+	1	0	AGO1-4	0	1	0	0	0	0	0	8
MIMAT0000278	hsa-miR-221-3p	ENSG00000138685	FGF2	protein_coding	chr4	123816082	123816088	123816082	123816088	+	3	0	AGO1-4,AGO2	1	0	0	0	0	0	0	6
MIMAT0000278	hsa-miR-221-3p	ENSG00000145375	SPATA5	protein_coding	chr4	124239422	124239427	124239422	124239427	+	1	0	AGO2	1	0	0	0	0	0	0	8
MIMAT0000278	hsa-miR-221-3p	ENSG00000138650	PCDH10	protein_coding	chr4	134112171	134112177	134112150	134112178	+	1	0	AGO2	1	0	0	1	1	0	0	13
MIMAT0000278	hsa-miR-221-3p	ENSG00000153130	SCOC	protein_coding	chr4	141303504	141303510	141303483	141303511	+	7	0	AGO1-4,AGO2	1	0	1	1	1	0	0	6
MIMAT0000278	hsa-miR-221-3p	ENSG00000109445	ZNF330	protein_coding	chr4	142155286	142155291	142155286	142155291	+	6	0	AGO1-4,AGO2	1	0	0	0	0	0	0	8
MIMAT0000278	hsa-miR-221-3p	ENSG00000109458	GAB1	protein_coding	chr4	144391492	144391498	144391476	144391498	+	2	0	AGO2	0	0	0	0	1	1	1	10
MIMAT0000278	hsa-miR-221-3p	ENSG00000153147	SMARCA5	protein_coding	chr4	144475486	144475492	144475464	144475492	+	2	0	AGO1,AGO1-4	0	0	0	1	0	1	1	8
MIMAT0000278	hsa-miR-221-3p	ENSG00000164163	ABCE1	protein_coding	chr4	146041235	146041259	146041235	146041259	+	6	0	AGO1-4,AGO2	0	0	0	0	1	0	0	6
MIMAT0000278	hsa-miR-221-3p	ENSG00000109654	TRIM2	protein_coding	chr4	154256386	154256392	154256365	154256393	+	2	0	AGO2	1	1	1	1	1	0	0	10
MIMAT0000278	hsa-miR-221-3p	ENSG00000120251	GRIA2	protein_coding	chr4	158286618	158286623	158286618	158286623	+	1	0	AGO2	1	0	1	0	0	0	0	8
MIMAT0000278	hsa-miR-221-3p	ENSG00000052795	FNIP2	protein_coding	chr4	159826406	159826412	159826385	159826413	+	6	0	AGO1-4,AGO2	1	0	1	1	1	0	0	10
MIMAT0000278	hsa-miR-221-3p	ENSG00000109756	RAPGEF2	protein_coding	chr4	160280569	160280576	160280569	160280576	+	12	0	AGO1-4,AGO2	1	0	0	0	0	0	0	8
MIMAT0000278	hsa-miR-221-3p	ENSG00000129116	PALLD	protein_coding	chr4	169847889	169847894	169847889	169847894	+	5	0	AGO1-4,AGO2	1	0	0	0	0	0	0	9
MIMAT0000278	hsa-miR-221-3p	ENSG00000109586	GALNT7	protein_coding	chr4	174243619	174243624	174243619	174243624	+	3	0	AGO2	1	0	0	0	0	0	0	7
MIMAT0000278	hsa-miR-221-3p	ENSG00000151718	WWC2	protein_coding	chr4	184239420	184239425	184239420	184239425	+	2	0	AGO2	1	0	0	0	0	0	0	6
MIMAT0000278	hsa-miR-221-3p	ENSG00000173320	STOX2	protein_coding	chr4	184938635	184938640	184938619	184938641	+	1	0	AGO3	1	0	0	0	1	0	1	11
MIMAT0000278	hsa-miR-221-3p	ENSG00000028310	BRD9	protein_coding	chr5	889166	889194	889166	889194	-	1	0	AGO2	0	0	0	1	0	0	0	4
MIMAT0000278	hsa-miR-221-3p	ENSG00000153395	LPCAT1	protein_coding	chr5	1462895	1462900	1462895	1462900	-	2	0	AGO2	1	0	0	0	0	0	0	9
MIMAT0000278	hsa-miR-221-3p	ENSG00000112902	SEMA5A	protein_coding	chr5	9040563	9040568	9040563	9040568	-	1	0	AGO1-4	1	0	0	0	0	0	0	12
MIMAT0000278	hsa-miR-221-3p	ENSG00000154153	RETREG1	protein_coding	chr5	16473483	16473489	16473482	16473510	-	2	0	AGO2	1	0	1	1	1	0	0	16
MIMAT0000278	hsa-miR-221-3p	ENSG00000145555	MYO10	protein_coding	chr5	16665976	16665981	16665975	16665996	-	8	0	AGO1-4,AGO2	1	0	0	0	1	1	1	8
MIMAT0000278	hsa-miR-221-3p	ENSG00000056097	ZFR	protein_coding	chr5	32417856	32417879	32417856	32417879	-	8	0	AGO1,AGO1-4,AGO2	0	1	0	0	0	0	0	10
MIMAT0000278	hsa-miR-221-3p	ENSG00000113494	PRLR	protein_coding	chr5	35056755	35056783	35056755	35056783	-	3	0	AGO1-4	0	0	0	1	0	0	0	8
MIMAT0000278	hsa-miR-221-3p	ENSG00000164187	LMBRD2	protein_coding	chr5	36098691	36098719	36098691	36098719	-	1	0	AGO1-4	0	0	0	1	0	0	0	11
MIMAT0000278	hsa-miR-221-3p	ENSG00000113594	LIFR	protein_coding	chr5	38475622	38475627	38475621	38475629	-	8	0	AGO2	1	0	0	0	0	1	1	13
MIMAT0000278	hsa-miR-221-3p	ENSG00000164327	RICTOR	protein_coding	chr5	38940763	38940768	38940763	38940768	-	5	0	AGO2	1	0	0	0	0	0	0	5
MIMAT0000278	hsa-miR-221-3p	ENSG00000145592	RPL37	protein_coding	chr5	40831667	40831673	40831666	40831689	-	2	0	AGO2	1	0	1	0	1	0	0	5
MIMAT0000278	hsa-miR-221-3p	ENSG00000083720	OXCT1	protein_coding	chr5	41730511	41730516	41730511	41730516	-	2	0	AGO2	1	0	0	0	0	0	0	10
MIMAT0000278	hsa-miR-221-3p	ENSG00000151882	CCL28	protein_coding	chr5	43381804	43381827	43381804	43381832	-	1	0	AGO2	0	0	0	1	1	0	0	8
MIMAT0000278	hsa-miR-221-3p	ENSG00000172239	PAIP1	protein_coding	chr5	43526738	43526743	43526737	43526765	-	2	0	AGO2	1	0	1	1	1	0	0	10
MIMAT0000278	hsa-miR-221-3p	ENSG00000155545	MIER3	protein_coding	chr5	56217979	56217984	56217978	56218006	-	2	0	AGO2	1	0	0	1	0	0	0	14
MIMAT0000278	hsa-miR-221-3p	ENSG00000049192	ADAMTS6	protein_coding	chr5	64445142	64445147	64445142	64445147	-	1	0	AGO2	1	0	1	0	0	0	0	7
MIMAT0000278	hsa-miR-221-3p	ENSG00000197860	SGTB	protein_coding	chr5	64962270	64962275	64962270	64962275	-	2	0	AGO2	1	0	0	0	0	0	0	12
MIMAT0000278	hsa-miR-221-3p	ENSG00000171617	ENC1	protein_coding	chr5	73923475	73923480	73923475	73923480	-	1	0	AGO1-4	1	0	0	0	0	0	0	8
MIMAT0000278	hsa-miR-221-3p	ENSG00000145685	LHFPL2	protein_coding	chr5	77781929	77781934	77781928	77781950	-	24	0	AGO1,AGO1-4,AGO2,AGO3	1	0	0	0	1	1	1	6
MIMAT0000278	hsa-miR-221-3p	ENSG00000113273	ARSB	protein_coding	chr5	78075253	78075258	78075253	78075258	-	2	0	AGO2	1	0	0	0	0	0	0	14
MIMAT0000278	hsa-miR-221-3p	ENSG00000152413	HOMER1	protein_coding	chr5	78671645	78671650	78671645	78671650	-	1	0	AGO1-4	1	0	0	0	0	0	0	9
MIMAT0000278	hsa-miR-221-3p	ENSG00000186468	RPS23	protein_coding	chr5	81569180	81569185	81569180	81569185	-	1	0	AGO2	1	0	0	0	0	0	0	7
MIMAT0000278	hsa-miR-221-3p	ENSG00000174695	TMEM167A	protein_coding	chr5	82348954	82348976	82348954	82348976	-	3	0	AGO1-4,AGO2	0	0	0	0	1	0	0	10
MIMAT0000278	hsa-miR-221-3p	ENSG00000153140	CETN3	protein_coding	chr5	89701256	89701261	89701256	89701261	-	1	0	AGO2	0	0	1	0	0	0	0	9
MIMAT0000278	hsa-miR-221-3p	ENSG00000113391	FAM172A	protein_coding	chr5	92954399	92954404	92954399	92954404	-	2	0	AGO2	1	0	0	0	0	0	0	14
MIMAT0000278	hsa-miR-221-3p	ENSG00000118985	ELL2	protein_coding	chr5	95222861	95222882	95222861	95222882	-	1	0	AGO2	0	0	0	0	1	0	0	3
MIMAT0000278	hsa-miR-221-3p	ENSG00000171444	MCC	protein_coding	chr5	112362059	112362064	112362059	112362064	-	2	0	AGO1-4	1	0	0	0	0	0	0	6
MIMAT0000278	hsa-miR-221-3p	ENSG00000152503	TRIM36	protein_coding	chr5	114460911	114460916	114460911	114460916	-	1	0	AGO2	1	0	0	0	0	0	0	10
MIMAT0000278	hsa-miR-221-3p	ENSG00000164219	PGGT1B	protein_coding	chr5	114548052	114548057	114548051	114548079	-	1	0	AGO1-4	1	0	1	1	0	1	0	15
MIMAT0000278	hsa-miR-221-3p	ENSG00000145780	FEM1C	protein_coding	chr5	114859349	114859354	114859349	114859354	-	3	0	AGO2	1	0	0	0	0	0	0	4
MIMAT0000278	hsa-miR-221-3p	ENSG00000134970	TMED7	protein_coding	chr5	114949756	114949761	114949756	114949761	-	5	0	AGO1,AGO2	1	0	1	0	0	0	0	8
MIMAT0000278	hsa-miR-221-3p	ENSG00000138829	FBN2	protein_coding	chr5	127594394	127594399	127594393	127594399	-	6	0	AGO1-4,AGO2	1	0	0	0	0	1	1	6
MIMAT0000278	hsa-miR-221-3p	ENSG00000217128	FNIP1	protein_coding	chr5	130978253	130978258	130978253	130978258	-	3	0	AGO1-4,AGO2	1	0	0	0	0	0	0	7
MIMAT0000278	hsa-miR-221-3p	ENSG00000164402	44447	protein_coding	chr5	132087025	132087032	132087024	132087046	-	2	0	AGO2	1	0	0	0	1	0	0	7
MIMAT0000278	hsa-miR-221-3p	ENSG00000113583	C5orf15	protein_coding	chr5	133291816	133291821	133291815	133291838	-	3	0	AGO1,AGO2	1	0	0	0	1	0	0	7
MIMAT0000278	hsa-miR-221-3p	ENSG00000113558	SKP1	protein_coding	chr5	133492897	133492903	133492896	133492917	-	10	0	AGO1,AGO1-4,AGO2	1	0	0	0	1	0	1	8
MIMAT0000278	hsa-miR-221-3p	ENSG00000152377	SPOCK1	protein_coding	chr5	136311130	136311136	136311129	136311150	-	8	0	AGO1-4,AGO2	1	0	1	0	1	0	0	11
MIMAT0000278	hsa-miR-221-3p	ENSG00000177733	HNRNPA0	protein_coding	chr5	137087398	137087403	137087397	137087425	-	7	0	AGO1,AGO1-4,AGO2	1	0	1	1	0	1	0	15
MIMAT0000278	hsa-miR-221-3p	ENSG00000112983	BRD8	protein_coding	chr5	137492681	137492686	137492681	137492686	-	3	0	AGO1-4,AGO2	1	0	0	0	0	0	0	12
MIMAT0000278	hsa-miR-221-3p	ENSG00000170464	DNAJC18	protein_coding	chr5	138748301	138748306	138748301	138748306	-	1	0	AGO2	1	0	0	0	0	0	0	15
MIMAT0000278	hsa-miR-221-3p	ENSG00000187678	SPRY4	protein_coding	chr5	141690200	141690205	141690200	141690205	-	3	0	AGO2	1	0	1	0	0	0	0	4
MIMAT0000278	hsa-miR-221-3p	ENSG00000113580	NR3C1	protein_coding	chr5	142658176	142658181	142658176	142658181	-	1	0	AGO1-4	1	0	0	0	0	0	0	8
MIMAT0000278	hsa-miR-221-3p	ENSG00000113657	DPYSL3	protein_coding	chr5	146771756	146771763	146771755	146771776	-	1	0	AGO2	1	0	0	0	1	0	0	9
MIMAT0000278	hsa-miR-221-3p	ENSG00000113712	CSNK1A1	protein_coding	chr5	148875253	148875258	148875253	148875258	-	13	0	AGO1-4,AGO2	1	0	0	0	0	0	0	7
MIMAT0000278	hsa-miR-221-3p	ENSG00000086570	FAT2	protein_coding	chr5	150883956	150883961	150883955	150883979	-	1	0	AGO1-4	1	0	0	0	1	1	1	2
MIMAT0000278	hsa-miR-221-3p	ENSG00000113140	SPARC	protein_coding	chr5	151042883	151042888	151042883	151042888	-	12	0	AGO1-4	1	0	0	0	0	0	0	9
MIMAT0000278	hsa-miR-221-3p	ENSG00000055147	FAM114A2	protein_coding	chr5	153371910	153371915	153371910	153371915	-	2	0	AGO1-4,AGO2	1	0	0	0	0	0	0	7
MIMAT0000278	hsa-miR-221-3p	ENSG00000170271	FAXDC2	protein_coding	chr5	154198666	154198671	154198666	154198671	-	1	0	AGO1-4	1	0	0	0	0	0	0	13
MIMAT0000278	hsa-miR-221-3p	ENSG00000113282	CLINT1	protein_coding	chr5	157213592	157213597	157213591	157213612	-	3	0	AGO1-4,AGO2	1	0	1	0	1	1	0	7
MIMAT0000278	hsa-miR-221-3p	ENSG00000120137	PANK3	protein_coding	chr5	167980125	167980130	167980125	167980130	-	1	0	AGO1-4	0	0	1	0	0	0	0	13
MIMAT0000278	hsa-miR-221-3p	ENSG00000072786	STK10	protein_coding	chr5	171469553	171469558	171469553	171469558	-	1	0	AGO2	1	0	0	0	0	0	0	5
MIMAT0000278	hsa-miR-221-3p	ENSG00000168246	UBTD2	protein_coding	chr5	171637603	171637608	171637603	171637608	-	6	0	AGO1-4,AGO2	1	0	0	0	0	0	0	9
MIMAT0000278	hsa-miR-221-3p	ENSG00000146083	RNF44	protein_coding	chr5	175953899	175953904	175953898	175953920	-	17	0	AGO1,AGO1-4,AGO2,AGO3	1	0	0	0	1	1	1	12
MIMAT0000278	hsa-miR-221-3p	ENSG00000113758	DBN1	protein_coding	chr5	176884144	176884149	176884144	176884149	-	7	0	AGO1-4,AGO2	1	0	0	0	0	0	0	10
MIMAT0000278	hsa-miR-221-3p	ENSG00000197226	TBC1D9B	protein_coding	chr5	179289443	179289448	179289443	179289448	-	2	0	AGO1,AGO2	1	0	0	0	0	0	0	6
MIMAT0000278	hsa-miR-221-3p	ENSG00000063438	AHRR	protein_coding	chr5	438104	438110	438089	438111	+	4	0	AGO1-4,AGO2	1	0	1	0	1	0	0	3
MIMAT0000278	hsa-miR-221-3p	ENSG00000112877	CEP72	protein_coding	chr5	653417	653422	653417	653422	+	1	0	AGO2	1	0	0	0	0	0	0	7
MIMAT0000278	hsa-miR-221-3p	ENSG00000112941	PAPD7	protein_coding	chr5	6756146	6756151	6756146	6756151	+	6	0	AGO2	1	0	0	0	0	0	0	2
MIMAT0000278	hsa-miR-221-3p	ENSG00000150753	CCT5	protein_coding	chr5	10264912	10264918	10264897	10264919	+	19	0	AGO1,AGO1-4,AGO2	1	0	1	0	1	0	0	10
MIMAT0000278	hsa-miR-221-3p	ENSG00000145495	44261	protein_coding	chr5	10434657	10434662	10434657	10434662	+	2	0	AGO2	1	0	0	0	0	0	0	9
MIMAT0000278	hsa-miR-221-3p	ENSG00000082213	C5orf22	protein_coding	chr5	31554378	31554402	31554378	31554402	+	11	0	AGO1,AGO1-4,AGO2,AGO3	0	0	0	0	1	0	0	5
MIMAT0000278	hsa-miR-221-3p	ENSG00000113387	SUB1	protein_coding	chr5	32602086	32602112	32602086	32602112	+	2	0	AGO2	0	0	0	0	1	0	0	7
MIMAT0000278	hsa-miR-221-3p	ENSG00000113389	NPR3	protein_coding	chr5	32786816	32786821	32786800	32786822	+	2	0	AGO2	1	0	0	0	1	0	0	8
MIMAT0000278	hsa-miR-221-3p	ENSG00000039560	RAI14	protein_coding	chr5	34831948	34831953	34831948	34831953	+	4	0	AGO1-4,AGO2	1	0	1	0	0	0	0	7
MIMAT0000278	hsa-miR-221-3p	ENSG00000113460	BRIX1	protein_coding	chr5	34925700	34925705	34925684	34925706	+	13	0	AGO1,AGO1-4,AGO2	1	0	1	0	1	0	0	6
MIMAT0000278	hsa-miR-221-3p	ENSG00000205765	C5orf51	protein_coding	chr5	41918117	41918122	41918117	41918122	+	6	0	AGO1,AGO2	1	0	0	0	0	0	0	7
MIMAT0000278	hsa-miR-221-3p	ENSG00000112964	GHR	protein_coding	chr5	42720152	42720159	42720152	42720159	+	1	0	AGO1-4	1	0	0	0	0	0	0	12
MIMAT0000278	hsa-miR-221-3p	ENSG00000112992	NNT	protein_coding	chr5	43704598	43704603	43704576	43704604	+	5	0	AGO1-4,AGO2	1	0	1	1	0	0	0	8
MIMAT0000278	hsa-miR-221-3p	ENSG00000164171	ITGA2	protein_coding	chr5	52390173	52390178	52390173	52390178	+	2	0	AGO2	1	0	0	0	0	0	0	4
MIMAT0000278	hsa-miR-221-3p	ENSG00000062194	GPBP1	protein_coding	chr5	56559081	56559086	56559059	56559087	+	3	1	AGO2	0	1	1	1	1	1	1	8
MIMAT0000278	hsa-miR-221-3p	ENSG00000123213	NLN	protein_coding	chr5	65120321	65120326	65120321	65120326	+	1	0	AGO1-4	0	0	1	0	0	0	0	6
MIMAT0000278	hsa-miR-221-3p	ENSG00000145675	PIK3R1	protein_coding	chr5	67593951	67593957	67593930	67593958	+	11	0	AGO1-4,AGO2	1	0	1	1	1	0	1	13
MIMAT0000278	hsa-miR-221-3p	ENSG00000152939	MARVELD2	protein_coding	chr5	68738987	68739010	68738982	68739010	+	1	0	AGO1-4	0	0	0	1	1	0	0	13
MIMAT0000278	hsa-miR-221-3p	ENSG00000083312	TNPO1	protein_coding	chr5	72205282	72205288	72205268	72205289	+	1	0	AGO1-4	1	0	1	0	1	0	0	10
MIMAT0000278	hsa-miR-221-3p	ENSG00000157107	FCHO2	protein_coding	chr5	72384906	72384911	72384884	72384912	+	4	0	AGO1-4,AGO2	1	0	1	1	0	0	0	9
MIMAT0000278	hsa-miR-221-3p	ENSG00000164338	UTP15	protein_coding	chr5	72876712	72876717	72876712	72876717	+	2	0	AGO2	1	0	0	0	0	0	0	6
MIMAT0000278	hsa-miR-221-3p	ENSG00000113161	HMGCR	protein_coding	chr5	74656573	74656578	74656573	74656578	+	7	0	AGO1-4,AGO2	1	0	0	0	0	0	0	12
MIMAT0000278	hsa-miR-221-3p	ENSG00000152409	JMY	protein_coding	chr5	78620388	78620409	78620388	78620409	+	5	0	AGO1-4,AGO2	0	0	0	0	1	0	0	11
MIMAT0000278	hsa-miR-221-3p	ENSG00000039319	ZFYVE16	protein_coding	chr5	79773399	79773404	79773377	79773405	+	8	0	AGO1,AGO1-4,AGO2	1	0	1	1	1	0	0	16
MIMAT0000278	hsa-miR-221-3p	ENSG00000131732	ZCCHC9	protein_coding	chr5	80608565	80608570	80608565	80608570	+	12	0	AGO1-4,AGO2	1	0	0	0	0	0	0	1
MIMAT0000278	hsa-miR-221-3p	ENSG00000133302	SLF1	protein_coding	chr5	94031420	94031425	94031420	94031425	+	1	0	AGO2	1	0	0	0	0	0	0	11
MIMAT0000278	hsa-miR-221-3p	ENSG00000164292	RHOBTB3	protein_coding	chr5	95129530	95129535	95129530	95129535	+	1	0	AGO2	1	0	0	0	0	0	0	9
MIMAT0000278	hsa-miR-221-3p	ENSG00000113441	LNPEP	protein_coding	chr5	96369353	96369358	96369353	96369358	+	1	0	AGO1-4	0	0	1	0	0	0	0	6
MIMAT0000278	hsa-miR-221-3p	ENSG00000174136	RGMB	protein_coding	chr5	98129832	98129837	98129832	98129837	+	25	0	AGO1,AGO1-4,AGO2	1	0	0	0	0	0	0	11
MIMAT0000278	hsa-miR-221-3p	ENSG00000181751	C5orf30	protein_coding	chr5	102614352	102614357	102614352	102614357	+	1	0	AGO1-4	1	0	0	0	0	0	0	8
MIMAT0000278	hsa-miR-221-3p	ENSG00000151422	FER	protein_coding	chr5	108525637	108525642	108525637	108525642	+	1	0	AGO1-4	0	0	1	0	0	0	0	8
MIMAT0000278	hsa-miR-221-3p	ENSG00000172795	DCP2	protein_coding	chr5	112349800	112349805	112349800	112349805	+	10	0	AGO1-4,AGO2	1	0	0	0	0	0	0	8
MIMAT0000278	hsa-miR-221-3p	ENSG00000064652	SNX24	protein_coding	chr5	122343677	122343682	122343675	122343682	+	3	0	AGO1-4	1	0	1	0	0	0	0	4
MIMAT0000278	hsa-miR-221-3p	ENSG00000164244	PRRC1	protein_coding	chr5	126887727	126887732	126887727	126887732	+	6	0	AGO1-4,AGO2	1	0	0	0	0	0	0	12
MIMAT0000278	hsa-miR-221-3p	ENSG00000145808	ADAMTS19	protein_coding	chr5	128956404	128956426	128956404	128956426	+	1	0	AGO1-4	0	0	0	0	1	0	0	17
MIMAT0000278	hsa-miR-221-3p	ENSG00000186687	LYRM7	protein_coding	chr5	130535798	130535803	130535798	130535803	+	3	0	AGO2	1	0	0	0	0	0	0	11
MIMAT0000278	hsa-miR-221-3p	ENSG00000158985	CDC42SE2	protein_coding	chr5	130728180	130728185	130728180	130728185	+	6	0	AGO1-4,AGO2	1	0	0	0	0	0	0	5
MIMAT0000278	hsa-miR-221-3p	ENSG00000113522	RAD50	protein_coding	chr5	131979181	131979186	131979181	131979186	+	2	0	AGO1-4	1	0	1	0	0	0	0	6
MIMAT0000278	hsa-miR-221-3p	ENSG00000283782	AC116366.3	protein_coding	chr5	131979181	131979186	131979181	131979186	+	2	0	AGO1-4	1	0	1	0	0	0	0	0
MIMAT0000278	hsa-miR-221-3p	ENSG00000113615	SEC24A	protein_coding	chr5	134062395	134062400	134062395	134062400	+	1	0	AGO2	1	0	0	0	0	0	0	9
MIMAT0000278	hsa-miR-221-3p	ENSG00000145833	DDX46	protein_coding	chr5	134165109	134165130	134165109	134165130	+	1	0	AGO2	0	0	0	0	1	0	0	12
MIMAT0000278	hsa-miR-221-3p	ENSG00000181904	C5orf24	protein_coding	chr5	134191985	134191991	134191971	134191992	+	3	0	AGO2	1	0	0	0	1	0	0	13
MIMAT0000278	hsa-miR-221-3p	ENSG00000112984	KIF20A	protein_coding	chr5	137523354	137523376	137523354	137523376	+	1	0	AGO2	0	0	0	0	1	0	0	3
MIMAT0000278	hsa-miR-221-3p	ENSG00000120727	PAIP2	protein_coding	chr5	138704513	138704518	138704497	138704519	+	29	0	AGO1,AGO1-4,AGO2,AGO3	1	0	0	0	1	1	1	18
MIMAT0000278	hsa-miR-221-3p	ENSG00000185129	PURA	protein_coding	chr5	139496012	139496017	139495996	139496018	+	17	0	AGO1-4,AGO2	1	0	0	0	1	1	1	11
MIMAT0000278	hsa-miR-221-3p	ENSG00000131503	ANKHD1	protein_coding	chr5	139919377	139919382	139919355	139919383	+	11	0	AGO1-4,AGO2,AGO3	1	0	1	1	1	1	1	5
MIMAT0000278	hsa-miR-221-3p	ENSG00000176087	SLC35A4	protein_coding	chr5	139948387	139948394	139948387	139948394	+	20	0	AGO1,AGO1-4,AGO2	1	0	0	0	0	0	0	11
MIMAT0000278	hsa-miR-221-3p	ENSG00000112855	HARS2	protein_coding	chr5	140078515	140078520	140078515	140078520	+	4	0	AGO1,AGO2	1	0	0	0	0	0	0	7
MIMAT0000278	hsa-miR-221-3p	ENSG00000081842	PCDHA6	protein_coding	chr5	140389583	140389588	140389567	140389589	+	5	0	AGO1-4,AGO2	1	0	0	0	1	1	1	8
MIMAT0000278	hsa-miR-221-3p	ENSG00000204961	PCDHA9	protein_coding	chr5	140389583	140389588	140389567	140389589	+	5	0	AGO1-4,AGO2	1	0	0	0	1	1	1	7
MIMAT0000278	hsa-miR-221-3p	ENSG00000204962	PCDHA8	protein_coding	chr5	140389583	140389588	140389567	140389589	+	5	0	AGO1-4,AGO2	1	0	0	0	1	1	1	7
MIMAT0000278	hsa-miR-221-3p	ENSG00000204963	PCDHA7	protein_coding	chr5	140389583	140389588	140389567	140389589	+	5	0	AGO1-4,AGO2	1	0	0	0	1	1	1	5
MIMAT0000278	hsa-miR-221-3p	ENSG00000204965	PCDHA5	protein_coding	chr5	140389583	140389588	140389567	140389589	+	5	0	AGO1-4,AGO2	1	0	0	0	1	1	1	7
MIMAT0000278	hsa-miR-221-3p	ENSG00000204967	PCDHA4	protein_coding	chr5	140389583	140389588	140389567	140389589	+	5	0	AGO1-4,AGO2	1	0	0	0	1	1	1	8
MIMAT0000278	hsa-miR-221-3p	ENSG00000204969	PCDHA2	protein_coding	chr5	140389583	140389588	140389567	140389589	+	5	0	AGO1-4,AGO2	1	0	0	0	1	1	1	10
MIMAT0000278	hsa-miR-221-3p	ENSG00000204970	PCDHA1	protein_coding	chr5	140389583	140389588	140389567	140389589	+	5	0	AGO1-4,AGO2	1	0	0	0	1	1	1	9
MIMAT0000278	hsa-miR-221-3p	ENSG00000239389	PCDHA13	protein_coding	chr5	140389583	140389588	140389567	140389589	+	5	0	AGO1-4,AGO2	1	0	0	0	1	1	1	9
MIMAT0000278	hsa-miR-221-3p	ENSG00000243232	PCDHAC2	protein_coding	chr5	140389583	140389588	140389567	140389589	+	5	0	AGO1-4,AGO2	1	0	0	0	1	1	1	8
MIMAT0000278	hsa-miR-221-3p	ENSG00000248383	PCDHAC1	protein_coding	chr5	140389583	140389588	140389567	140389589	+	5	0	AGO1-4,AGO2	1	0	0	0	1	1	1	8
MIMAT0000278	hsa-miR-221-3p	ENSG00000249158	PCDHA11	protein_coding	chr5	140389583	140389588	140389567	140389589	+	5	0	AGO1-4,AGO2	1	0	0	0	1	1	1	9
MIMAT0000278	hsa-miR-221-3p	ENSG00000250120	PCDHA10	protein_coding	chr5	140389583	140389588	140389567	140389589	+	5	0	AGO1-4,AGO2	1	0	0	0	1	1	1	9
MIMAT0000278	hsa-miR-221-3p	ENSG00000251664	PCDHA12	protein_coding	chr5	140389583	140389588	140389567	140389589	+	5	0	AGO1-4,AGO2	1	0	0	0	1	1	1	10
MIMAT0000278	hsa-miR-221-3p	ENSG00000255408	PCDHA3	protein_coding	chr5	140389583	140389588	140389567	140389589	+	5	0	AGO1-4,AGO2	1	0	0	0	1	1	1	10
MIMAT0000278	hsa-miR-221-3p	ENSG00000081853	PCDHGA2	protein_coding	chr5	140892208	140892215	140892208	140892215	+	2	0	AGO1-4	1	0	0	0	0	0	0	8
MIMAT0000278	hsa-miR-221-3p	ENSG00000204956	PCDHGA1	protein_coding	chr5	140892208	140892215	140892208	140892215	+	2	0	AGO1-4	1	0	0	0	0	0	0	2
MIMAT0000278	hsa-miR-221-3p	ENSG00000240184	PCDHGC3	protein_coding	chr5	140892208	140892215	140892208	140892215	+	2	0	AGO1-4	1	0	0	0	0	0	0	6
MIMAT0000278	hsa-miR-221-3p	ENSG00000240764	PCDHGC5	protein_coding	chr5	140892208	140892215	140892208	140892215	+	2	0	AGO1-4	1	0	0	0	0	0	0	3
MIMAT0000278	hsa-miR-221-3p	ENSG00000242419	PCDHGC4	protein_coding	chr5	140892208	140892215	140892208	140892215	+	2	0	AGO1-4	1	0	0	0	0	0	0	6
MIMAT0000278	hsa-miR-221-3p	ENSG00000253159	PCDHGA12	protein_coding	chr5	140892208	140892215	140892208	140892215	+	2	0	AGO1-4	1	0	0	0	0	0	0	7
MIMAT0000278	hsa-miR-221-3p	ENSG00000253305	PCDHGB6	protein_coding	chr5	140892208	140892215	140892208	140892215	+	2	0	AGO1-4	1	0	0	0	0	0	0	6
MIMAT0000278	hsa-miR-221-3p	ENSG00000253485	PCDHGA5	protein_coding	chr5	140892208	140892215	140892208	140892215	+	2	0	AGO1-4	1	0	0	0	0	0	0	7
MIMAT0000278	hsa-miR-221-3p	ENSG00000253537	PCDHGA7	protein_coding	chr5	140892208	140892215	140892208	140892215	+	2	0	AGO1-4	1	0	0	0	0	0	0	6
MIMAT0000278	hsa-miR-221-3p	ENSG00000253731	PCDHGA6	protein_coding	chr5	140892208	140892215	140892208	140892215	+	2	0	AGO1-4	1	0	0	0	0	0	0	6
MIMAT0000278	hsa-miR-221-3p	ENSG00000253767	PCDHGA8	protein_coding	chr5	140892208	140892215	140892208	140892215	+	2	0	AGO1-4	1	0	0	0	0	0	0	5
MIMAT0000278	hsa-miR-221-3p	ENSG00000253846	PCDHGA10	protein_coding	chr5	140892208	140892215	140892208	140892215	+	2	0	AGO1-4	1	0	0	0	0	0	0	2
MIMAT0000278	hsa-miR-221-3p	ENSG00000253873	PCDHGA11	protein_coding	chr5	140892208	140892215	140892208	140892215	+	2	0	AGO1-4	1	0	0	0	0	0	0	3
MIMAT0000278	hsa-miR-221-3p	ENSG00000253910	PCDHGB2	protein_coding	chr5	140892208	140892215	140892208	140892215	+	2	0	AGO1-4	1	0	0	0	0	0	0	4
MIMAT0000278	hsa-miR-221-3p	ENSG00000253953	PCDHGB4	protein_coding	chr5	140892208	140892215	140892208	140892215	+	2	0	AGO1-4	1	0	0	0	0	0	0	6
MIMAT0000278	hsa-miR-221-3p	ENSG00000254122	PCDHGB7	protein_coding	chr5	140892208	140892215	140892208	140892215	+	2	0	AGO1-4	1	0	0	0	0	0	0	7
MIMAT0000278	hsa-miR-221-3p	ENSG00000254221	PCDHGB1	protein_coding	chr5	140892208	140892215	140892208	140892215	+	2	0	AGO1-4	1	0	0	0	0	0	0	5
MIMAT0000278	hsa-miR-221-3p	ENSG00000254245	PCDHGA3	protein_coding	chr5	140892208	140892215	140892208	140892215	+	2	0	AGO1-4	1	0	0	0	0	0	0	9
MIMAT0000278	hsa-miR-221-3p	ENSG00000261934	PCDHGA9	protein_coding	chr5	140892208	140892215	140892208	140892215	+	2	0	AGO1-4	1	0	0	0	0	0	0	8
MIMAT0000278	hsa-miR-221-3p	ENSG00000262209	PCDHGB3	protein_coding	chr5	140892208	140892215	140892208	140892215	+	2	0	AGO1-4	1	0	0	0	0	0	0	10
MIMAT0000278	hsa-miR-221-3p	ENSG00000262576	PCDHGA4	protein_coding	chr5	140892208	140892215	140892208	140892215	+	2	0	AGO1-4	1	0	0	0	0	0	0	7
MIMAT0000278	hsa-miR-221-3p	ENSG00000276547	PCDHGB5	protein_coding	chr5	140892208	140892215	140892208	140892215	+	2	0	AGO1-4	1	0	0	0	0	0	0	7
MIMAT0000278	hsa-miR-221-3p	ENSG00000131507	NDFIP1	protein_coding	chr5	141532334	141532339	141532334	141532340	+	8	0	AGO1-4,AGO2,AGO3	1	0	0	0	0	1	1	11
MIMAT0000278	hsa-miR-221-3p	ENSG00000183111	ARHGEF37	protein_coding	chr5	149012980	149012986	149012965	149012987	+	1	0	AGO1-4	1	0	1	0	1	0	0	6
MIMAT0000278	hsa-miR-221-3p	ENSG00000155850	SLC26A2	protein_coding	chr5	149361548	149361553	149361548	149361553	+	9	0	AGO1-4,AGO2	1	0	0	0	0	0	0	11
MIMAT0000278	hsa-miR-221-3p	ENSG00000171992	SYNPO	protein_coding	chr5	150038486	150038491	150038486	150038491	+	1	0	AGO1-4	1	0	0	0	0	0	0	8
MIMAT0000278	hsa-miR-221-3p	ENSG00000123643	SLC36A1	protein_coding	chr5	150871238	150871243	150871238	150871243	+	4	0	AGO1-4,AGO2	1	0	1	0	0	0	0	10
MIMAT0000278	hsa-miR-221-3p	ENSG00000037749	MFAP3	protein_coding	chr5	153432501	153432529	153432501	153432529	+	5	0	AGO1,AGO2	0	0	0	1	0	0	0	8
MIMAT0000278	hsa-miR-221-3p	ENSG00000164574	GALNT10	protein_coding	chr5	153798264	153798269	153798264	153798269	+	4	0	AGO1-4,AGO2	1	0	1	0	0	0	0	7
MIMAT0000278	hsa-miR-221-3p	ENSG00000155506	LARP1	protein_coding	chr5	154196570	154196575	154196570	154196575	+	4	0	AGO1-4,AGO2	1	0	0	0	0	0	0	6
MIMAT0000278	hsa-miR-221-3p	ENSG00000231989	PPP1R2B	protein_coding	chr5	156278931	156278954	156278931	156278954	+	1	0	AGO1-4	0	0	0	0	1	0	0	1
MIMAT0000278	hsa-miR-221-3p	ENSG00000172548	NIPAL4	protein_coding	chr5	156900290	156900295	156900277	156900296	+	1	0	AGO2	1	0	0	0	1	1	1	2
MIMAT0000278	hsa-miR-221-3p	ENSG00000022355	GABRA1	protein_coding	chr5	161325830	161325835	161325808	161325836	+	1	0	AGO2	1	0	1	1	1	1	1	6
MIMAT0000278	hsa-miR-221-3p	ENSG00000113742	CPEB4	protein_coding	chr5	173383238	173383243	173383216	173383244	+	6	0	AGO1-4,AGO2	1	0	1	1	0	0	0	12
MIMAT0000278	hsa-miR-221-3p	ENSG00000164466	SFXN1	protein_coding	chr5	174953784	174953789	174953784	174953789	+	10	0	AGO1-4,AGO2	1	0	1	0	0	0	0	11
MIMAT0000278	hsa-miR-221-3p	ENSG00000113194	FAF2	protein_coding	chr5	175935316	175935321	175935316	175935321	+	5	0	AGO1-4,AGO2	1	0	0	0	0	0	0	8
MIMAT0000278	hsa-miR-221-3p	ENSG00000048140	TSPAN17	protein_coding	chr5	176085674	176085679	176085674	176085679	+	2	0	AGO1-4,AGO2	1	0	0	0	0	0	0	4
MIMAT0000278	hsa-miR-221-3p	ENSG00000145911	N4BP3	protein_coding	chr5	177551770	177551775	177551770	177551775	+	1	0	AGO1-4	1	0	0	0	0	0	0	6
MIMAT0000278	hsa-miR-221-3p	ENSG00000127022	CANX	protein_coding	chr5	179156323	179156328	179156323	179156328	+	14	0	AGO1-4,AGO2	1	0	0	0	0	0	0	10
MIMAT0000278	hsa-miR-221-3p	ENSG00000161021	MAML1	protein_coding	chr5	179202313	179202318	179202297	179202319	+	10	0	AGO2	1	0	0	0	1	0	0	7
MIMAT0000278	hsa-miR-221-3p	ENSG00000161011	SQSTM1	protein_coding	chr5	179264195	179264200	179264195	179264200	+	17	1	AGO1,AGO1-4,AGO2	1	0	0	0	0	0	0	4
MIMAT0000278	hsa-miR-221-3p	ENSG00000113300	CNOT6	protein_coding	chr5	180001537	180001542	180001537	180001543	+	8	0	AGO1-4,AGO2	1	0	0	0	0	0	1	9
MIMAT0000278	hsa-miR-221-3p	ENSG00000112685	EXOC2	protein_coding	chr6	485414	485421	485414	485421	-	2	0	AGO1-4,AGO2	1	0	0	0	0	0	0	10
MIMAT0000278	hsa-miR-221-3p	ENSG00000214113	LYRM4	protein_coding	chr6	5109379	5109384	5109379	5109384	-	2	0	AGO1-4,AGO2	1	0	0	0	0	0	0	14
MIMAT0000278	hsa-miR-221-3p	ENSG00000137203	TFAP2A	protein_coding	chr6	10397750	10397755	10397749	10397755	-	9	0	AGO1,AGO1-4,AGO2,AGO3	1	0	1	0	0	0	1	4
MIMAT0000278	hsa-miR-221-3p	ENSG00000111859	NEDD9	protein_coding	chr6	11190241	11190264	11190241	11190264	-	2	0	AGO1-4,AGO2	0	1	0	0	0	0	0	6
MIMAT0000278	hsa-miR-221-3p	ENSG00000124788	ATXN1	protein_coding	chr6	16301529	16301534	16301528	16301556	-	13	0	AGO1,AGO1-4,AGO2,AGO3	1	0	1	1	0	0	1	11
MIMAT0000278	hsa-miR-221-3p	ENSG00000235109	ZSCAN31	protein_coding	chr6	28292718	28292724	28292717	28292745	-	2	0	AGO2	1	0	1	1	1	0	0	11
MIMAT0000278	hsa-miR-221-3p	ENSG00000158691	ZSCAN12	protein_coding	chr6	28346912	28346934	28346912	28346940	-	1	0	AGO1	0	0	0	1	1	0	0	15
MIMAT0000278	hsa-miR-221-3p	ENSG00000223501	VPS52	protein_coding	chr6	33218159	33218181	33218159	33218181	-	5	0	AGO1-4,AGO2	0	0	0	0	1	0	0	12
MIMAT0000278	hsa-miR-221-3p	ENSG00000231925	TAPBP	protein_coding	chr6	33268808	33268830	33268808	33268830	-	8	0	AGO1-4,AGO2	0	0	0	0	1	0	0	3
MIMAT0000278	hsa-miR-221-3p	ENSG00000124493	GRM4	protein_coding	chr6	33989685	33989690	33989685	33989690	-	1	0	AGO1-4	1	0	0	0	0	0	0	9
MIMAT0000278	hsa-miR-221-3p	ENSG00000064995	TAF11	protein_coding	chr6	34846198	34846204	34846197	34846218	-	4	0	AGO1-4	1	0	1	0	1	0	0	13
MIMAT0000278	hsa-miR-221-3p	ENSG00000137168	PPIL1	protein_coding	chr6	36823277	36823284	36823276	36823298	-	16	0	AGO1,AGO1-4,AGO2	1	1	0	0	1	0	0	13
MIMAT0000278	hsa-miR-221-3p	ENSG00000137207	YIPF3	protein_coding	chr6	43479783	43479788	43479783	43479788	-	2	0	AGO1-4	1	0	0	0	0	0	0	10
MIMAT0000278	hsa-miR-221-3p	ENSG00000124571	XPO5	protein_coding	chr6	43491546	43491551	43491546	43491551	-	2	0	AGO1-4	1	0	0	0	0	0	0	12
MIMAT0000278	hsa-miR-221-3p	ENSG00000112796	ENPP5	protein_coding	chr6	46128833	46128838	46128833	46128838	-	3	0	AGO1-4	1	0	0	0	0	0	0	16
MIMAT0000278	hsa-miR-221-3p	ENSG00000065308	TRAM2	protein_coding	chr6	52362867	52362873	52362866	52362873	-	3	0	AGO2	1	0	1	0	0	0	1	8
MIMAT0000278	hsa-miR-221-3p	ENSG00000170899	GSTA4	protein_coding	chr6	52843000	52843005	52843000	52843005	-	1	0	AGO2	1	0	0	0	0	0	0	14
MIMAT0000278	hsa-miR-221-3p	ENSG00000112144	ICK	protein_coding	chr6	52866556	52866561	52866556	52866561	-	2	0	AGO2	1	0	0	0	0	0	0	15
MIMAT0000278	hsa-miR-221-3p	ENSG00000112210	RAB23	protein_coding	chr6	57054863	57054869	57054862	57054884	-	4	0	AGO1-4	1	0	0	0	1	0	0	14
MIMAT0000278	hsa-miR-221-3p	ENSG00000146247	PHIP	protein_coding	chr6	79646014	79646036	79646014	79646036	-	2	0	AGO1-4,AGO2	0	0	0	0	1	0	0	11
MIMAT0000278	hsa-miR-221-3p	ENSG00000112773	FAM46A	protein_coding	chr6	82456185	82456192	82456184	82456206	-	5	0	AGO1-4,AGO2	1	0	0	0	1	0	0	2
MIMAT0000278	hsa-miR-221-3p	ENSG00000135316	SYNCRIP	protein_coding	chr6	86318052	86318058	86318052	86318058	-	3	0	AGO1-4,AGO2	0	0	0	0	0	1	0	7
MIMAT0000278	hsa-miR-221-3p	ENSG00000118432	CNR1	protein_coding	chr6	88849775	88849782	88849774	88849802	-	1	0	AGO2	1	0	0	1	1	0	0	14
MIMAT0000278	hsa-miR-221-3p	ENSG00000111880	RNGTT	protein_coding	chr6	89322027	89322032	89322027	89322032	-	2	0	AGO2	1	0	1	0	0	0	0	9
MIMAT0000278	hsa-miR-221-3p	ENSG00000198833	UBE2J1	protein_coding	chr6	90036835	90036840	90036834	90036862	-	6	0	AGO1-4,AGO2,AGO3	1	0	1	1	1	1	1	9
MIMAT0000278	hsa-miR-221-3p	ENSG00000083099	LYRM2	protein_coding	chr6	90343624	90343631	90343624	90343631	-	2	0	AGO1-4,AGO2	1	0	0	0	0	0	0	12
MIMAT0000278	hsa-miR-221-3p	ENSG00000112237	CCNC	protein_coding	chr6	99991122	99991127	99991121	99991149	-	3	0	AGO1,AGO1-4,AGO2	1	0	0	1	1	0	0	7
MIMAT0000278	hsa-miR-221-3p	ENSG00000112249	ASCC3	protein_coding	chr6	101306333	101306338	101306333	101306338	-	1	0	AGO2	1	0	0	0	0	0	0	5
MIMAT0000278	hsa-miR-221-3p	ENSG00000081087	OSTM1	protein_coding	chr6	108362756	108362762	108362755	108362783	-	2	0	AGO1-4,AGO2	1	0	1	1	1	0	0	6
MIMAT0000278	hsa-miR-221-3p	ENSG00000135535	CD164	protein_coding	chr6	109688131	109688137	109688130	109688154	-	16	0	AGO1,AGO1-4,AGO2,AGO3	1	0	1	0	1	0	0	8
MIMAT0000278	hsa-miR-221-3p	ENSG00000112365	ZBTB24	protein_coding	chr6	109785816	109785821	109785816	109785821	-	1	0	AGO1-4	1	0	0	0	0	0	0	8
MIMAT0000278	hsa-miR-221-3p	ENSG00000155085	AK9	protein_coding	chr6	109953014	109953020	109953013	109953037	-	2	0	AGO1-4	1	0	1	0	1	0	0	13
MIMAT0000278	hsa-miR-221-3p	ENSG00000155111	CDK19	protein_coding	chr6	110931392	110931397	110931391	110931419	-	6	0	AGO1-4,AGO2	1	0	1	1	1	0	0	11
MIMAT0000278	hsa-miR-221-3p	ENSG00000009413	REV3L	protein_coding	chr6	111620629	111620634	111620628	111620653	-	12	0	AGO1-4,AGO2	1	0	0	0	1	1	1	12
MIMAT0000278	hsa-miR-221-3p	ENSG00000111816	FRK	protein_coding	chr6	116263226	116263231	116263225	116263247	-	2	0	AGO2	1	0	0	0	1	0	1	10
MIMAT0000278	hsa-miR-221-3p	ENSG00000047932	GOPC	protein_coding	chr6	117882627	117882632	117882627	117882632	-	1	0	AGO2	1	0	0	0	0	0	0	8
MIMAT0000278	hsa-miR-221-3p	ENSG00000111897	SERINC1	protein_coding	chr6	122765289	122765294	122765289	122765294	-	2	0	AGO2	1	0	0	0	0	0	0	9
MIMAT0000278	hsa-miR-221-3p	ENSG00000152894	PTPRK	protein_coding	chr6	128290906	128290913	128290905	128290927	-	4	0	AGO2	1	0	0	0	1	0	0	4
MIMAT0000278	hsa-miR-221-3p	ENSG00000118523	CTGF	protein_coding	chr6	132270011	132270016	132270011	132270016	-	11	0	AGO1-4	1	0	0	0	0	0	0	6
MIMAT0000278	hsa-miR-221-3p	ENSG00000027697	IFNGR1	protein_coding	chr6	137518847	137518852	137518847	137518852	-	8	0	AGO1,AGO1-4,AGO2	1	0	0	0	0	0	0	4
MIMAT0000278	hsa-miR-221-3p	ENSG00000135540	NHSL1	protein_coding	chr6	138744485	138744510	138744485	138744510	-	6	0	AGO1,AGO2,AGO3	0	0	0	0	1	0	0	9
MIMAT0000278	hsa-miR-221-3p	ENSG00000164440	TXLNB	protein_coding	chr6	139562504	139562509	139562504	139562509	-	1	0	AGO1-4	1	0	0	0	0	0	0	9
MIMAT0000278	hsa-miR-221-3p	ENSG00000164442	CITED2	protein_coding	chr6	139694062	139694067	139694061	139694083	-	7	0	AGO1-4,AGO2	1	0	0	0	1	0	0	10
MIMAT0000278	hsa-miR-221-3p	ENSG00000001036	FUCA2	protein_coding	chr6	143816773	143816778	143816773	143816778	-	5	0	AGO1-4,AGO2	1	0	0	0	0	0	0	5
MIMAT0000278	hsa-miR-221-3p	ENSG00000146414	SHPRH	protein_coding	chr6	146206247	146206253	146206246	146206265	-	2	0	AGO1-4,AGO2	1	0	0	0	1	0	0	12
MIMAT0000278	hsa-miR-221-3p	ENSG00000153721	CNKSR3	protein_coding	chr6	154727002	154727009	154727002	154727009	-	2	0	AGO2	1	0	0	0	0	0	0	15
MIMAT0000278	hsa-miR-221-3p	ENSG00000112096	SOD2	protein_coding	chr6	160102974	160102981	160102973	160102994	-	13	0	AGO1-4,AGO2	1	0	0	0	1	0	0	6
MIMAT0000278	hsa-miR-221-3p	ENSG00000186340	THBS2	protein_coding	chr6	169616178	169616185	169616177	169616199	-	5	0	AGO1-4	1	0	0	0	1	0	0	7
MIMAT0000278	hsa-miR-221-3p	ENSG00000130024	PHF10	protein_coding	chr6	170107381	170107405	170107381	170107405	-	7	1	AGO1-4,AGO2	0	0	0	0	1	0	0	17
MIMAT0000278	hsa-miR-221-3p	ENSG00000137265	IRF4	protein_coding	chr6	408321	408326	408321	408326	+	2	0	AGO1-4,AGO2	1	0	1	0	0	0	0	5
MIMAT0000278	hsa-miR-221-3p	ENSG00000112739	PRPF4B	protein_coding	chr6	4062144	4062149	4062144	4062149	+	1	0	AGO1-4	1	0	0	0	0	0	0	13
MIMAT0000278	hsa-miR-221-3p	ENSG00000124782	RREB1	protein_coding	chr6	7251352	7251358	7251335	7251358	+	20	0	AGO1,AGO1-4,AGO2	0	0	0	0	1	1	1	7
MIMAT0000278	hsa-miR-221-3p	ENSG00000168566	SNRNP48	protein_coding	chr6	7612123	7612129	7612108	7612130	+	2	0	AGO2	1	0	0	0	1	0	0	9
MIMAT0000278	hsa-miR-221-3p	ENSG00000153162	BMP6	protein_coding	chr6	7880779	7880784	7880779	7880784	+	1	0	AGO2	1	0	1	0	0	0	0	14
MIMAT0000278	hsa-miR-221-3p	ENSG00000224531	SMIM13	protein_coding	chr6	11136819	11136824	11136819	11136824	+	2	0	AGO1-4	0	0	1	0	0	0	0	7
MIMAT0000278	hsa-miR-221-3p	ENSG00000205269	TMEM170B	protein_coding	chr6	11576202	11576208	11576202	11576208	+	8	0	AGO1-4,AGO2	1	0	0	0	0	0	0	17
MIMAT0000278	hsa-miR-221-3p	ENSG00000112149	CD83	protein_coding	chr6	14136579	14136584	14136579	14136584	+	1	0	AGO2	1	0	0	0	0	0	0	3
MIMAT0000278	hsa-miR-221-3p	ENSG00000007944	MYLIP	protein_coding	chr6	16148261	16148266	16148239	16148267	+	60	0	AGO1,AGO1-4,AGO2,AGO3	1	0	1	1	1	1	1	18
MIMAT0000278	hsa-miR-221-3p	ENSG00000112183	RBM24	protein_coding	chr6	17293546	17293571	17293543	17293571	+	1	0	AGO2	0	0	0	1	1	0	0	17
MIMAT0000278	hsa-miR-221-3p	ENSG00000137393	RNF144B	protein_coding	chr6	18466810	18466817	18466810	18466817	+	3	0	AGO1-4,AGO2	1	0	0	0	0	0	0	5
MIMAT0000278	hsa-miR-221-3p	ENSG00000112242	E2F3	protein_coding	chr6	20491427	20491432	20491427	20491432	+	21	0	AGO1-4,AGO2,AGO3	1	0	0	0	0	0	0	8
MIMAT0000278	hsa-miR-221-3p	ENSG00000124766	SOX4	protein_coding	chr6	21598257	21598262	21598257	21598262	+	7	0	AGO1,AGO1-4,AGO2	1	0	0	0	0	0	0	13
MIMAT0000278	hsa-miR-221-3p	ENSG00000124532	MRS2	protein_coding	chr6	24424617	24424622	24424617	24424622	+	1	0	AGO1-4	1	0	0	0	0	0	0	17
MIMAT0000278	hsa-miR-221-3p	ENSG00000112312	GMNN	protein_coding	chr6	24786088	24786093	24786088	24786093	+	26	0	AGO1,AGO1-4,AGO2	1	0	0	0	0	0	0	10
MIMAT0000278	hsa-miR-221-3p	ENSG00000186470	BTN3A2	protein_coding	chr6	26377945	26377951	26377945	26377951	+	1	0	AGO2	1	0	0	0	0	0	0	5
MIMAT0000278	hsa-miR-221-3p	ENSG00000196787	HIST1H2AG	protein_coding	chr6	27101411	27101416	27101409	27101416	+	1	0	AGO1-4	1	0	1	0	0	0	0	3
MIMAT0000278	hsa-miR-221-3p	ENSG00000198315	ZKSCAN8	protein_coding	chr6	28122276	28122282	28122255	28122283	+	7	0	AGO1,AGO1-4,AGO2,AGO3	1	0	1	1	1	0	0	14
MIMAT0000278	hsa-miR-221-3p	ENSG00000204580	DDR1	protein_coding	chr6	30867675	30867680	30867675	30867680	+	4	0	AGO1-4,AGO2	0	0	1	0	0	0	0	7
MIMAT0000278	hsa-miR-221-3p	ENSG00000204220	PFDN6	protein_coding	chr6	33258682	33258687	33258663	33258688	+	2	4	AGO2	0	0	1	0	1	0	0	6
MIMAT0000278	hsa-miR-221-3p	ENSG00000197283	SYNGAP1	protein_coding	chr6	33424892	33424897	33424892	33424897	+	15	0	AGO1-4,AGO2	1	0	0	0	0	0	0	11
MIMAT0000278	hsa-miR-221-3p	ENSG00000213588	ZBTB9	protein_coding	chr6	33424892	33424897	33424892	33424897	+	15	0	AGO1-4,AGO2	1	0	0	0	0	0	0	2
MIMAT0000278	hsa-miR-221-3p	ENSG00000096433	ITPR3	protein_coding	chr6	33664067	33664072	33664067	33664072	+	2	0	AGO1-4,AGO2	1	0	0	0	0	0	0	5
MIMAT0000278	hsa-miR-221-3p	ENSG00000146197	SCUBE3	protein_coding	chr6	35217207	35217212	35217207	35217212	+	1	0	AGO1-4	1	0	0	0	0	0	0	10
MIMAT0000278	hsa-miR-221-3p	ENSG00000112078	KCTD20	protein_coding	chr6	36456754	36456759	36456754	36456759	+	2	0	AGO2	1	0	0	0	0	0	0	15
MIMAT0000278	hsa-miR-221-3p	ENSG00000198663	C6orf89	protein_coding	chr6	36893299	36893304	36893299	36893304	+	2	0	AGO1-4	1	0	0	0	0	0	0	13
MIMAT0000278	hsa-miR-221-3p	ENSG00000065491	TBC1D22B	protein_coding	chr6	37299817	37299822	37299801	37299823	+	2	0	AGO2	1	0	0	0	1	0	1	6
MIMAT0000278	hsa-miR-221-3p	ENSG00000124593	AL365205.1	protein_coding	chr6	41757062	41757067	41757062	41757067	+	4	0	AGO1-4,AGO2	1	0	0	0	0	0	0	9
MIMAT0000278	hsa-miR-221-3p	ENSG00000214736	TOMM6	protein_coding	chr6	41757062	41757067	41757062	41757067	+	4	0	AGO1-4,AGO2	1	0	0	0	0	0	0	0
MIMAT0000278	hsa-miR-221-3p	ENSG00000024048	UBR2	protein_coding	chr6	42647490	42647496	42647474	42647497	+	3	0	AGO1-4,AGO2	0	0	1	0	1	0	0	6
MIMAT0000278	hsa-miR-221-3p	ENSG00000124702	KLHDC3	protein_coding	chr6	42988631	42988636	42988631	42988636	+	8	0	AGO1-4,AGO2	1	0	0	0	0	0	0	15
MIMAT0000278	hsa-miR-221-3p	ENSG00000137171	KLC4	protein_coding	chr6	43038561	43038585	43038561	43038585	+	1	0	AGO2	0	0	0	0	1	0	0	18
MIMAT0000278	hsa-miR-221-3p	ENSG00000124813	RUNX2	protein_coding	chr6	45518554	45518559	45518538	45518560	+	4	0	AGO2	1	0	1	0	1	1	1	3
MIMAT0000278	hsa-miR-221-3p	ENSG00000198087	CD2AP	protein_coding	chr6	47594602	47594607	47594602	47594608	+	31	0	AGO1,AGO1-4,AGO2	1	0	0	0	0	1	1	7
MIMAT0000278	hsa-miR-221-3p	ENSG00000031691	CENPQ	protein_coding	chr6	49460393	49460398	49460393	49460398	+	2	0	AGO2	1	0	0	0	0	0	0	8
MIMAT0000278	hsa-miR-221-3p	ENSG00000112146	FBXO9	protein_coding	chr6	52963435	52963441	52963420	52963442	+	1	0	AGO2	1	0	0	0	1	0	0	17
MIMAT0000278	hsa-miR-221-3p	ENSG00000146242	TPBG	protein_coding	chr6	83076257	83076262	83076235	83076263	+	8	0	AGO1-4,AGO2	1	0	1	1	0	0	0	5
MIMAT0000278	hsa-miR-221-3p	ENSG00000146281	PM20D2	protein_coding	chr6	89873100	89873105	89873100	89873105	+	2	0	AGO1-4,AGO2	1	0	0	0	0	0	0	9
MIMAT0000278	hsa-miR-221-3p	ENSG00000184486	POU3F2	protein_coding	chr6	99286482	99286487	99286466	99286488	+	2	0	AGO1,AGO2	1	0	0	0	1	0	0	11
MIMAT0000278	hsa-miR-221-3p	ENSG00000057657	PRDM1	protein_coding	chr6	106556845	106556852	106556831	106556853	+	6	0	AGO1-4,AGO2	1	0	0	0	1	0	0	6
MIMAT0000278	hsa-miR-221-3p	ENSG00000112320	SOBP	protein_coding	chr6	107980583	107980588	107980583	107980588	+	8	0	AGO1-4,AGO2	1	0	0	0	0	0	0	12
MIMAT0000278	hsa-miR-221-3p	ENSG00000118689	FOXO3	protein_coding	chr6	109002898	109002903	109002898	109002903	+	5	0	AGO1-4,AGO2	1	0	0	0	0	0	0	7
MIMAT0000278	hsa-miR-221-3p	ENSG00000168438	CDC40	protein_coding	chr6	110551900	110551905	110551884	110551906	+	4	0	AGO1,AGO2	1	0	0	0	1	0	0	9
MIMAT0000278	hsa-miR-221-3p	ENSG00000155115	GTF3C6	protein_coding	chr6	111289072	111289077	111289072	111289077	+	2	0	AGO1-4	1	0	0	0	0	0	0	6
MIMAT0000278	hsa-miR-221-3p	ENSG00000277443	MARCKS	protein_coding	chr6	114182813	114182818	114182796	114182819	+	7	3	AGO1-4,AGO2	1	0	1	0	1	0	1	6
MIMAT0000278	hsa-miR-221-3p	ENSG00000153989	NUS1	protein_coding	chr6	118030179	118030184	118030179	118030184	+	1	0	AGO2	1	0	0	0	0	0	0	6
MIMAT0000278	hsa-miR-221-3p	ENSG00000111907	TPD52L1	protein_coding	chr6	125584411	125584417	125584397	125584418	+	8	0	AGO1-4,AGO2	1	0	1	0	1	0	0	7
MIMAT0000278	hsa-miR-221-3p	ENSG00000118513	MYB	protein_coding	chr6	135539352	135539357	135539352	135539357	+	1	0	AGO1-4	1	0	1	0	0	0	0	9
MIMAT0000278	hsa-miR-221-3p	ENSG00000112419	PHACTR2	protein_coding	chr6	144145671	144145676	144145656	144145677	+	5	0	AGO1-4,AGO2	1	0	0	0	1	0	0	5
MIMAT0000278	hsa-miR-221-3p	ENSG00000118508	RAB32	protein_coding	chr6	146876042	146876047	146876042	146876047	+	3	0	AGO1-4,AGO2	1	0	0	0	0	0	0	4
MIMAT0000278	hsa-miR-221-3p	ENSG00000111962	UST	protein_coding	chr6	149397057	149397062	149397057	149397062	+	1	0	AGO1-4	1	0	0	0	0	0	0	10
MIMAT0000278	hsa-miR-221-3p	ENSG00000091831	ESR1	protein_coding	chr6	152420650	152420655	152420628	152420656	+	3	0	AGO1-4	1	0	0	1	1	0	0	14
MIMAT0000278	hsa-miR-221-3p	ENSG00000130338	TULP4	protein_coding	chr6	158928444	158928449	158928444	158928449	+	1	0	AGO2	1	0	0	0	0	0	0	11
MIMAT0000278	hsa-miR-221-3p	ENSG00000146477	SLC22A3	protein_coding	chr6	160872300	160872306	160872286	160872307	+	1	0	AGO2	1	0	1	0	1	0	0	4
MIMAT0000278	hsa-miR-221-3p	ENSG00000112531	QKI	protein_coding	chr6	163992724	163992729	163992708	163992730	+	12	0	AGO1,AGO1-4,AGO2	1	0	0	0	1	1	1	10
MIMAT0000278	hsa-miR-221-3p	ENSG00000130396	AFDN	protein_coding	chr6	168363500	168363505	168363500	168363505	+	2	0	AGO1-4,AGO2	1	0	0	0	0	0	0	11
MIMAT0000278	hsa-miR-221-3p	ENSG00000197461	PDGFA	protein_coding	chr7	538008	538013	538007	538013	-	8	0	AGO1,AGO1-4,AGO2,AGO3	1	0	0	0	0	1	1	6
MIMAT0000278	hsa-miR-221-3p	ENSG00000086232	EIF2AK1	protein_coding	chr7	6063615	6063620	6063615	6063620	-	13	0	AGO1,AGO1-4,AGO2,AGO3	1	0	0	0	0	0	0	13
MIMAT0000278	hsa-miR-221-3p	ENSG00000008256	CYTH3	protein_coding	chr7	6202807	6202813	6202807	6202813	-	2	0	AGO2	1	0	0	0	0	0	0	6
MIMAT0000278	hsa-miR-221-3p	ENSG00000136240	KDELR2	protein_coding	chr7	6500942	6500947	6500942	6500947	-	2	0	AGO1,AGO1-4	1	0	1	0	0	0	0	10
MIMAT0000278	hsa-miR-221-3p	ENSG00000164631	ZNF12	protein_coding	chr7	6728830	6728835	6728830	6728835	-	7	0	AGO1,AGO1-4,AGO2	1	0	0	0	0	0	0	14
MIMAT0000278	hsa-miR-221-3p	ENSG00000071189	SNX13	protein_coding	chr7	17830772	17830793	17830772	17830793	-	3	0	AGO2	0	0	0	0	1	0	0	8
MIMAT0000278	hsa-miR-221-3p	ENSG00000105849	TWISTNB	protein_coding	chr7	19736498	19736505	19736497	19736516	-	3	0	AGO1-4,AGO2	1	0	0	0	1	0	0	6
MIMAT0000278	hsa-miR-221-3p	ENSG00000164649	CDCA7L	protein_coding	chr7	21940787	21940793	21940786	21940811	-	2	0	AGO1-4,AGO2	1	0	0	0	1	0	0	6
MIMAT0000278	hsa-miR-221-3p	ENSG00000196683	TOMM7	protein_coding	chr7	22852652	22852657	22852652	22852657	-	14	0	AGO1-4,AGO2	1	0	0	0	0	0	0	5
MIMAT0000278	hsa-miR-221-3p	ENSG00000070882	OSBPL3	protein_coding	chr7	24836192	24836198	24836191	24836219	-	3	1	AGO1-4,AGO2	1	0	1	1	1	0	1	2
MIMAT0000278	hsa-miR-221-3p	ENSG00000122592	HOXA7	protein_coding	chr7	27193519	27193524	27193518	27193524	-	1	0	AGO3	1	0	0	0	0	1	1	5
MIMAT0000278	hsa-miR-221-3p	ENSG00000136193	SCRN1	protein_coding	chr7	29961773	29961778	29961773	29961778	-	4	0	AGO1-4,AGO2	1	0	0	0	0	0	0	3
MIMAT0000278	hsa-miR-221-3p	ENSG00000006625	GGCT	protein_coding	chr7	30536392	30536397	30536392	30536397	-	20	0	AGO1-4,AGO2	1	0	0	0	0	0	0	5
MIMAT0000278	hsa-miR-221-3p	ENSG00000173852	DPY19L1	protein_coding	chr7	34969012	34969017	34969012	34969017	-	2	0	AGO1-4,AGO2	1	0	0	0	0	0	0	7
MIMAT0000278	hsa-miR-221-3p	ENSG00000164542	KIAA0895	protein_coding	chr7	36364736	36364741	36364736	36364741	-	6	0	AGO1-4,AGO2	1	0	0	0	0	0	0	13
MIMAT0000278	hsa-miR-221-3p	ENSG00000106571	GLI3	protein_coding	chr7	42003362	42003367	42003362	42003367	-	1	0	AGO1	1	0	0	0	0	0	0	8
MIMAT0000278	hsa-miR-221-3p	ENSG00000062582	MRPS24	protein_coding	chr7	43906267	43906272	43906267	43906272	-	6	0	AGO1-4,AGO2	1	0	0	0	0	0	0	6
MIMAT0000278	hsa-miR-221-3p	ENSG00000270617	URGCP-MRPS24	protein_coding	chr7	43906267	43906272	43906267	43906272	-	6	0	AGO1-4,AGO2	1	0	0	0	0	0	0	5
MIMAT0000278	hsa-miR-221-3p	ENSG00000146676	PURB	protein_coding	chr7	44920447	44920452	44920447	44920452	-	1	0	AGO1-4	1	0	0	0	0	0	0	8
MIMAT0000278	hsa-miR-221-3p	ENSG00000136273	HUS1	protein_coding	chr7	48004553	48004558	48004553	48004558	-	1	0	AGO2	1	0	0	0	0	0	0	8
MIMAT0000278	hsa-miR-221-3p	ENSG00000132436	FIGNL1	protein_coding	chr7	50512075	50512080	50512075	50512080	-	3	0	AGO2	1	0	0	0	0	0	0	10
MIMAT0000278	hsa-miR-221-3p	ENSG00000106070	GRB10	protein_coding	chr7	50658236	50658242	50658235	50658263	-	6	0	AGO1-4,AGO2	1	0	1	1	1	0	1	10
MIMAT0000278	hsa-miR-221-3p	ENSG00000154997	44453	protein_coding	chr7	55861624	55861647	55861624	55861652	-	1	0	AGO2	0	0	0	1	1	0	0	3
MIMAT0000278	hsa-miR-221-3p	ENSG00000146733	PSPH	protein_coding	chr7	56078892	56078897	56078891	56078913	-	7	0	AGO1-4,AGO2	1	0	0	0	1	0	0	10
MIMAT0000278	hsa-miR-221-3p	ENSG00000106635	BCL7B	protein_coding	chr7	72951470	72951475	72951470	72951475	-	3	0	AGO1-4	1	0	0	0	0	0	0	5
MIMAT0000278	hsa-miR-221-3p	ENSG00000176410	DNAJC30	protein_coding	chr7	73096732	73096737	73096732	73096737	-	5	0	AGO1-4	1	0	0	0	0	0	0	7
MIMAT0000278	hsa-miR-221-3p	ENSG00000170027	YWHAG	protein_coding	chr7	75956151	75956156	75956150	75956178	-	18	4	AGO1-4,AGO2	1	0	1	1	1	1	1	7
MIMAT0000278	hsa-miR-221-3p	ENSG00000075223	SEMA3C	protein_coding	chr7	80372089	80372095	80372088	80372110	-	7	0	AGO1-4,AGO2	1	0	1	0	1	0	0	3
MIMAT0000278	hsa-miR-221-3p	ENSG00000164659	KIAA1324L	protein_coding	chr7	86509769	86509786	86509769	86509786	-	1	0	AGO1-4	0	0	0	0	1	0	0	12
MIMAT0000278	hsa-miR-221-3p	ENSG00000001631	KRIT1	protein_coding	chr7	91829409	91829415	91829408	91829436	-	7	0	AGO1-4,AGO2	1	0	1	1	1	0	0	11
MIMAT0000278	hsa-miR-221-3p	ENSG00000127980	PEX1	protein_coding	chr7	92116406	92116411	92116405	92116426	-	3	0	AGO2	1	0	0	0	1	0	0	14
MIMAT0000278	hsa-miR-221-3p	ENSG00000105810	CDK6	protein_coding	chr7	92237481	92237486	92237481	92237486	-	1	0	AGO2	1	0	0	0	0	0	0	5
MIMAT0000278	hsa-miR-221-3p	ENSG00000004864	SLC25A13	protein_coding	chr7	95749818	95749824	95749817	95749838	-	5	0	AGO1-4,AGO2	1	0	0	0	1	0	0	12
MIMAT0000278	hsa-miR-221-3p	ENSG00000198742	SMURF1	protein_coding	chr7	98625652	98625658	98625652	98625658	-	5	0	AGO1-4,AGO2	1	0	0	0	0	0	0	1
MIMAT0000278	hsa-miR-221-3p	ENSG00000106244	PDAP1	protein_coding	chr7	98992755	98992760	98992755	98992760	-	3	0	AGO1-4,AGO2	1	0	0	0	0	0	0	6
MIMAT0000278	hsa-miR-221-3p	ENSG00000146833	TRIM4	protein_coding	chr7	99489542	99489547	99489542	99489547	-	2	0	AGO2	1	0	0	0	0	0	0	8
MIMAT0000278	hsa-miR-221-3p	ENSG00000176402	GJC3	protein_coding	chr7	99521068	99521074	99521068	99521074	-	1	0	AGO1-4	0	0	1	0	0	0	0	12
MIMAT0000278	hsa-miR-221-3p	ENSG00000166526	ZNF3	protein_coding	chr7	99667638	99667643	99667637	99667643	-	11	0	AGO1-4,AGO2	1	0	0	0	0	1	0	14
MIMAT0000278	hsa-miR-221-3p	ENSG00000106327	TFR2	protein_coding	chr7	100218287	100218294	100218286	100218309	-	1	1	AGO1-4	1	1	0	0	0	0	0	9
MIMAT0000278	hsa-miR-221-3p	ENSG00000146830	GIGYF1	protein_coding	chr7	100278245	100278250	100278245	100278250	-	6	0	AGO1-4,AGO2	1	0	0	0	0	0	0	8
MIMAT0000278	hsa-miR-221-3p	ENSG00000161048	NAPEPLD	protein_coding	chr7	102741587	102741592	102741587	102741592	-	8	0	AGO1-4,AGO2	1	0	0	0	0	0	0	10
MIMAT0000278	hsa-miR-221-3p	ENSG00000135250	SRPK2	protein_coding	chr7	104757703	104757709	104757702	104757723	-	2	0	AGO1-4,AGO2	1	0	0	0	1	0	1	10
MIMAT0000278	hsa-miR-221-3p	ENSG00000146776	ATXN7L1	protein_coding	chr7	105247905	105247910	105247904	105247923	-	2	0	AGO1-4,AGO2	0	1	1	0	0	0	0	11
MIMAT0000278	hsa-miR-221-3p	ENSG00000164597	COG5	protein_coding	chr7	106843561	106843567	106843561	106843567	-	3	0	AGO1,AGO1-4,AGO2	1	0	0	0	0	0	0	10
MIMAT0000278	hsa-miR-221-3p	ENSG00000146802	TMEM168	protein_coding	chr7	112407138	112407143	112407138	112407143	-	9	0	AGO1,AGO2	1	0	0	0	0	0	0	15
MIMAT0000278	hsa-miR-221-3p	ENSG00000106025	TSPAN12	protein_coding	chr7	120428407	120428412	120428407	120428412	-	1	0	AGO2	1	0	0	0	0	0	0	19
MIMAT0000278	hsa-miR-221-3p	ENSG00000106299	WASL	protein_coding	chr7	123323862	123323867	123323862	123323867	-	1	0	AGO2	1	0	0	0	0	0	0	9
MIMAT0000278	hsa-miR-221-3p	ENSG00000146842	TMEM209	protein_coding	chr7	129806147	129806153	129806146	129806174	-	4	0	AGO1-4,AGO2	1	0	1	1	1	0	0	10
MIMAT0000278	hsa-miR-221-3p	ENSG00000128567	PODXL	protein_coding	chr7	131185314	131185319	131185314	131185319	-	3	0	AGO1-4,AGO2	1	0	1	0	0	0	0	9
MIMAT0000278	hsa-miR-221-3p	ENSG00000205060	SLC35B4	protein_coding	chr7	133975493	133975498	133975493	133975498	-	5	0	AGO2	1	0	0	0	0	0	0	10
MIMAT0000278	hsa-miR-221-3p	ENSG00000080802	CNOT4	protein_coding	chr7	135072893	135072898	135072892	135072914	-	9	0	AGO1,AGO1-4,AGO2,AGO3	1	0	0	0	1	0	0	10
MIMAT0000278	hsa-miR-221-3p	ENSG00000064393	HIPK2	protein_coding	chr7	139249842	139249847	139249841	139249869	-	15	0	AGO1-4,AGO2	0	0	1	1	0	1	1	11
MIMAT0000278	hsa-miR-221-3p	ENSG00000006459	KDM7A	protein_coding	chr7	139787534	139787539	139787534	139787539	-	1	0	AGO1-4	1	0	0	0	0	0	0	10
MIMAT0000278	hsa-miR-221-3p	ENSG00000157764	BRAF	protein_coding	chr7	140425485	140425491	140425485	140425491	-	2	0	AGO1-4	0	0	1	0	0	0	0	13
MIMAT0000278	hsa-miR-221-3p	ENSG00000055609	KMT2C	protein_coding	chr7	151832664	151832669	151832663	151832691	-	9	0	AGO1-4,AGO2	1	0	1	1	1	1	1	14
MIMAT0000278	hsa-miR-221-3p	ENSG00000157212	PAXIP1	protein_coding	chr7	154767409	154767437	154767409	154767437	-	1	0	AGO1	0	0	0	1	0	0	0	15
MIMAT0000278	hsa-miR-221-3p	ENSG00000105983	LMBR1	protein_coding	chr7	156473346	156473353	156473346	156473353	-	1	0	AGO1-4	0	0	0	0	0	0	1	8
MIMAT0000278	hsa-miR-221-3p	ENSG00000117868	ESYT2	protein_coding	chr7	158523861	158523866	158523861	158523866	-	1	0	AGO1-4	1	0	1	0	0	0	0	11
MIMAT0000278	hsa-miR-221-3p	ENSG00000106003	LFNG	protein_coding	chr7	2567876	2567881	2567876	2567881	+	4	0	AGO1-4,AGO2	1	0	0	0	0	0	0	9
MIMAT0000278	hsa-miR-221-3p	ENSG00000174945	AMZ1	protein_coding	chr7	2754574	2754580	2754560	2754581	+	2	0	AGO1-4	1	0	0	0	1	0	0	5
MIMAT0000278	hsa-miR-221-3p	ENSG00000157954	WIPI2	protein_coding	chr7	5271406	5271411	5271406	5271411	+	1	0	AGO2	1	0	0	0	0	0	0	3
MIMAT0000278	hsa-miR-221-3p	ENSG00000122584	NXPH1	protein_coding	chr7	8792418	8792424	8792397	8792425	+	1	0	AGO1-4	1	0	1	1	1	0	1	10
MIMAT0000278	hsa-miR-221-3p	ENSG00000106460	TMEM106B	protein_coding	chr7	12272949	12272956	12272935	12272957	+	1	0	AGO1	1	0	0	0	1	0	0	9
MIMAT0000278	hsa-miR-221-3p	ENSG00000122644	ARL4A	protein_coding	chr7	12730455	12730460	12730455	12730460	+	1	0	AGO2	1	0	0	0	0	0	0	7
MIMAT0000278	hsa-miR-221-3p	ENSG00000106537	TSPAN13	protein_coding	chr7	16823475	16823481	16823457	16823482	+	15	1	AGO1,AGO1-4,AGO2,AGO3	1	0	1	0	1	0	0	11
MIMAT0000278	hsa-miR-221-3p	ENSG00000105855	ITGB8	protein_coding	chr7	20449847	20449852	20449847	20449853	+	13	0	AGO1-4,AGO2	1	0	0	0	0	1	1	6
MIMAT0000278	hsa-miR-221-3p	ENSG00000105866	SP4	protein_coding	chr7	21552845	21552850	21552845	21552850	+	8	0	AGO1-4,AGO2	1	0	0	0	0	0	0	12
[truncated: 293 more rows]
